# Supplementary material for: Regioselectivity inversion tuned by iron(iii) salts in palladium-catalyzed carbonylations
Source: Royal Society of Chemistry journal article supplement (doi:10.1039/c8cc01190g), 2018-01-01

**Electronic Supplementary Information (ESI)**  
for

**Regioselectivity Inversion Tuned by Iron(III) Salts in  
Palladium-Catalyzed Carbonylations**

Zijun Huang,<sup>a, b</sup> Yazhe Cheng,<sup>a</sup> Xipeng Chen,<sup>a</sup> Hui-Fang Wang,<sup>\*, c</sup> Chen-Xia Du,<sup>d</sup> and Yuehui Li<sup>\*, a</sup>

<sup>a</sup>State Key Laboratory for Oxo Synthesis and Selective Oxidation, Suzhou Research Institute of LICP, Lanzhou Institute of Chemical Physics (LICP), Chinese Academy of Sciences, Lanzhou 730000, P. R. China

<sup>b</sup>University of Chinese Academy of Sciences, Beijing 100049, P. R. China.

<sup>c</sup>State and Local Joint Engineering Laboratory for Novel Functional Polymeric Materials, College of Chemistry, Chemical Engineering and Materials Science, Soochow University, Suzhou 215123, P. R. China

<sup>d</sup>College of Chemistry and Molecular Engineering, Zhengzhou University, Zhengzhou 450001, P. R. China  
E-mail: H.-F. Wang (wanghf@suda.edu.cn) or Y.Li (yhli@licp.cas.cn).

**Supporting Information**

|                                                |                |
|------------------------------------------------|----------------|
| <b>1. General information</b>                  | <b>S2</b>      |
| <b>2. Screening of the reaction conditions</b> | <b>S3-9</b>    |
| <b>3. Mechanism study</b>                      | <b>S10-32</b>  |
| <b>4. Characterization data</b>                | <b>S33-46</b>  |
| <b>5. References</b>                           | <b>S47</b>     |
| <b>6. Copies of spectra</b>                    | <b>S48-123</b> |

## 1. General information

Unless otherwise stated, all the materials were purchased from commercial suppliers and were used as received. CO (99.95%) was purchased from Messer (Wujiang, China), the grade of  $^{13}\text{CO}$  (99%, 99 atom %  $^{13}\text{C}$ ) is Sigma (USA). Solvents were dried by solvent purification system from LC Technology Solution Inc. Flash chromatography was performed on silica gel. The products were characterized by  $^1\text{H}$  NMR,  $^{13}\text{C}$  NMR, and HRMS spectroscopy. All  $^1\text{H}$  and  $^{13}\text{C}$  NMR spectra were recorded on Bruker 400 MHz spectrometer and Agilent 600 MHz spectrometer. The NMR chemical shift values refer to  $\text{CDCl}_3$  ( $\delta$  ( $^1\text{H}$ ), 7.26 ppm;  $\delta$  ( $^{13}\text{C}$ ), 77.16 ppm),  $\text{DMSO-}d_6$  ( $\delta$  ( $^1\text{H}$ ), 2.50 ppm;  $\delta$  ( $^{13}\text{C}$ ), 39.52 ppm),  $\text{THF-}d_8$  ( $\delta$  ( $^1\text{H}$ ), 1.72 ppm;  $\delta$  ( $^{13}\text{C}$ ), 25.31 ppm). GC-MS data were obtained Shimadzu GCMS-QP2010 SE, GC data were obtained Shimadzu GC-2010 Plus, HRMS data were obtained on Agilent 6530 spectrometer. UV-Vis spectroscopic data were obtained Shimadzu UV-2600. All measurements were carried out at room temperature unless otherwise stated.

## 2. Screening of the reaction conditions

**General Procedure:** The [Pd] source, ligand (PPh<sub>3</sub>), additive, solvent (2 mL), **1a** (104 mg, 1.0 mmol) and a stirring bar were added into a vial (5 mL) in glovebox. After sealed, the vial was brought out of the glovebox followed by addition of H<sub>2</sub>O with syringe under nitrogen atmosphere. The vial was placed in an alloyed plate, which was then transferred into an autoclave (250 mL) under nitrogen flow. Then, the autoclave was flushed with CO gas for three times and pressurized with CO gas to 50 bar. The reaction was performed at 80 °C for 10 h. After the reaction finished, the autoclave was cooled to room temperature and the pressure was carefully released. Then, dodecane (20 mg) and 2,6-dimethylbenzoic acid (15 mg) were added into the vial. Conversion was determined by GC using dodecane as an internal standard. The yield and regioselectivity were measured by <sup>1</sup>H NMR analysis of the crude reaction mixture using 2,6-dimethylbenzoic acid as an internal standard.

Firstly, different palladium sources were screened in the presence of PPh<sub>3</sub> and FeCl<sub>3</sub> for hydroxycarbonylation of styrene, (Table S1).

**Table S1** Investigation of different palladium sources on catalytic hydroxycarbonylation of **1a**<sup>a</sup>

| Entry | Catalyst/x mol%                                           | Conv. (%) <sup>b</sup> | Yield (%) <sup>c</sup> | <i>iso/n</i> <sup>c</sup> |
|-------|-----------------------------------------------------------|------------------------|------------------------|---------------------------|
| 1     | Pd(OAc) <sub>2</sub> /1                                   | 100                    | 96 (91) <sup>d</sup>   | >99/1                     |
| 2     | -                                                         | 43                     | 0                      | -                         |
| 3     | Pd(CF <sub>3</sub> COO) <sub>2</sub> /1                   | 79                     | 67                     | 96/4                      |
| 4     | Pd(acac) <sub>2</sub> /1                                  | 58                     | 58                     | 98/2                      |
| 5     | PdCl <sub>2</sub> /1                                      | 100                    | 99                     | 99/1                      |
| 6     | PdBr <sub>2</sub> /1                                      | 30                     | 26                     | 89/11                     |
| 7     | PdCl <sub>2</sub> (PPh <sub>3</sub> ) <sub>2</sub> /1     | 100                    | 97                     | 99/1                      |
| 8     | Pd(CH <sub>3</sub> CN) <sub>4</sub> (OTf) <sub>2</sub> /1 | 93                     | 87                     | 97/3                      |
| 9     | Pd(PPh <sub>3</sub> ) <sub>4</sub> /1                     | 58                     | 57                     | 97/3                      |

<sup>a</sup> Reaction conditions: **1a** (1.0 mmol), CO (50 bar), H<sub>2</sub>O (2.0 mmol), [Pd] source (0.01 mmol), 1,4-dioxane (2.0 mL), 80 °C, 10 h. <sup>b</sup> Conversion was determined by GC using dodecane as an internal standard. <sup>c</sup> Yield and ratio of *iso/n* was determined by <sup>1</sup>H NMR analysis of the crude reaction mixture using 2,6-dimethylbenzoic acid as an internal standard. <sup>d</sup> Isolated yield. acac = 2,4-pentanedionato-O,O'. PPh<sub>3</sub> = triphenylphosphine. OTf = triflate.

Different regioselectivity was observed when changing the amounts of ligands (Table S2) or using different type of ligands.

**Table S2** Ligand effect on Pd-catalyzed hydroxycarbonylation of **1a**<sup>a</sup>

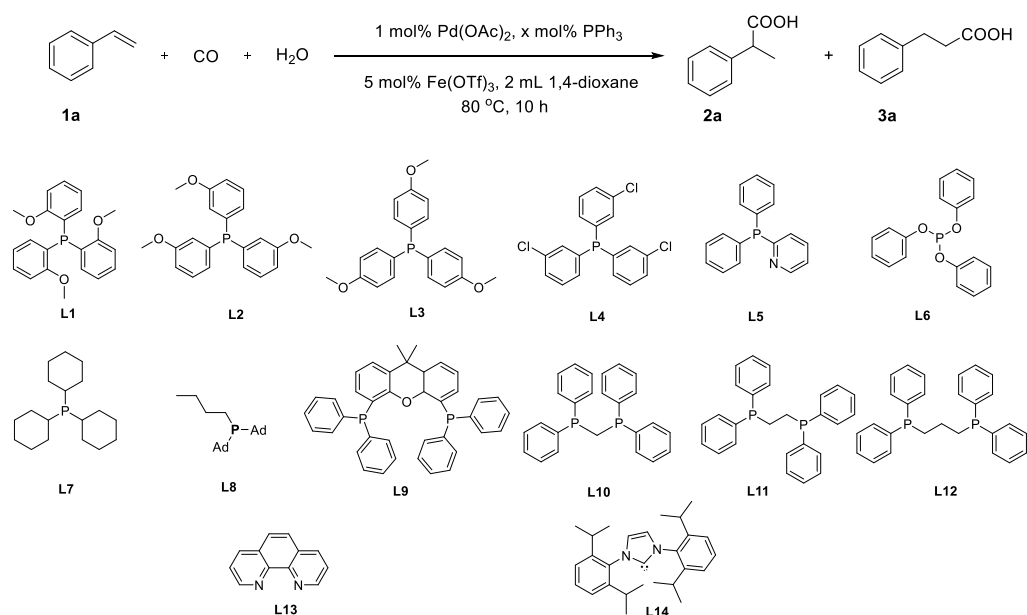

| Entry | Ligand/x mol%            | Conv. (%) <sup>b</sup> | Yield (%) <sup>c</sup>     | <i>iso/n</i> <sup>c</sup> |
|-------|--------------------------|------------------------|----------------------------|---------------------------|
| 1     | 0                        | 41                     | 0                          | -                         |
| 2     | <b>PPh<sub>3</sub>/2</b> | <b>100</b>             | <b>78</b>                  | <b>99/1</b>               |
| 3     | <b>PPh<sub>3</sub>/3</b> | <b>100</b>             | <b>96 (91)<sup>d</sup></b> | <b>&gt;99/1</b>           |
| 4     | <b>PPh<sub>3</sub>/6</b> | <b>78</b>              | <b>68</b>                  | <b>92/8</b>               |
| 5     | <b>L1/3</b>              | 56                     | 39                         | 99/1                      |
| 6     | <b>L2/3</b>              | 100                    | 90                         | 99/1                      |
| 7     | <b>L3/3</b>              | 99                     | 96                         | 98/2                      |
| 8     | <b>L4/3</b>              | 100                    | 95                         | >99/1                     |
| 9     | <b>L5/3</b>              | 68                     | 58                         | 90/10                     |
| 10    | <b>L6/3</b>              | 57                     | 11                         | >99/1                     |
| 11    | <b>L7/3</b>              | 42                     | 12                         | >99/1                     |
| 12    | <b>L8/3</b>              | 13                     | 4                          | >99/1                     |
| 13    | <b>L9/1.5</b>            | 87                     | 79                         | 55/45                     |
| 14    | <b>L10/1.5</b>           | 30                     | 6                          | 99/1                      |
| 15    | <b>L11/1.5</b>           | 33                     | 19                         | 67/33                     |
| 16    | <b>L12/1.5</b>           | 13                     | 6                          | 67/33                     |
| 17    | <b>L13/1.5</b>           | 18                     | 6                          | 75/25                     |
| 18    | <b>L14/1.5</b>           | 16                     | 0                          | -                         |

<sup>a</sup>Reaction conditions: **1a** (1.0 mmol), CO (50 bar), H<sub>2</sub>O (2.0 mmol), Pd(OAc)<sub>2</sub> (0.01 mmol), 1,4-dioxane (2.0 mL), 80 °C, 10 h. <sup>b</sup>Conversion of **1a** was determined by GC using dodecane as an internal standard. <sup>c</sup>Yield and ratio of *iso/n* was determined by <sup>1</sup>H NMR analysis of the crude reaction mixture using 2,6-dimethylbenzoic acid as an internal standard. <sup>d</sup>Isolated yield.

As shown in Table S3 for the hydroxycarbonylation of styrene, high *iso*-regioselectivity was observed when FeCl<sub>3</sub> or FeBr<sub>3</sub> were used as the acidic additive. And, when Fe(OTf)<sub>3</sub> was used, linear product **3a** was generated as the major product (59% selectivity).

**Table S3** Additive effect on Pd-catalyzed hydroxycarbonylation of **1a**.<sup>a</sup>

| Entry              | Additive/x mol%                                   | Conv. (%) <sup>b</sup> | Yield (%) <sup>c</sup>     | <i>iso/n</i> <sup>c</sup> |
|--------------------|---------------------------------------------------|------------------------|----------------------------|---------------------------|
| <b>1</b>           | <b>FeCl<sub>3</sub>/2</b>                         | <b>100</b>             | <b>96 (91)<sup>d</sup></b> | <b>&gt;99/1</b>           |
| 2                  | -                                                 | 5                      | 0                          | -                         |
| 3                  | FeF <sub>3</sub> /2                               | 5                      | trace                      | -                         |
| <b>4</b>           | <b>FeBr<sub>3</sub>/2</b>                         | <b>85</b>              | <b>67</b>                  | <b>96/4</b>               |
| 5                  | FeCl <sub>2</sub> /2                              | 5                      | 0                          | -                         |
| <b>6</b>           | <b>Fe(OTf)<sub>3</sub>/2</b>                      | <b>28</b>              | <b>27</b>                  | <b>41/59</b>              |
| 7                  | Fe(OAc) <sub>3</sub> /2                           | 5                      | trace                      | -                         |
| 8 <sup>e</sup>     | Fe(NTf) <sub>3</sub> /2                           | 5                      | 0                          | -                         |
| 9                  | Fe <sub>3</sub> (CO) <sub>12</sub> /2             | 4                      | 0                          | -                         |
| 10                 | Iron(III) citrate/2                               | 3                      | 0                          | -                         |
| 11                 | Fe <sub>3</sub> O <sub>4</sub> /2                 | 3                      | 0                          | -                         |
| 12                 | Fe(NO <sub>3</sub> ) <sub>3</sub> /2              | 21                     | trace                      | -                         |
| 13                 | Fe(acac) <sub>3</sub> /2                          | 4                      | 0                          | -                         |
| 14                 | LiCl/2                                            | 4                      | 0                          | -                         |
| 15                 | MgCl <sub>2</sub> /2                              | 11                     | trace                      | -                         |
| 16                 | CaCl <sub>2</sub> /2                              | 5                      | trace                      | -                         |
| 17                 | ZnCl <sub>2</sub> /2                              | 67                     | 10                         | 84/16                     |
| 18                 | CuCl <sub>2</sub> /2                              | 100                    | 35                         | >99/1                     |
| 19                 | NaSbF <sub>6</sub> /2                             | 27                     | 0                          | -                         |
| 20                 | (C <sub>6</sub> F <sub>5</sub> ) <sub>3</sub> B/2 | 80                     | 15                         | 73/27                     |
| 21                 | AlCl <sub>3</sub> /2                              | 100                    | 79                         | 99/1                      |
| 22 <sup>f</sup>    | Al(NTf) <sub>3</sub> /2                           | 100                    | 100                        | 63/37                     |
| 23                 | 37% HCl/2                                         | 92                     | 91                         | 99/1                      |
| 24                 | PTSA/2                                            | 19                     | trace                      | -                         |
| 25                 | PTSA/2, LiCl/2                                    | 3                      | 0                          | -                         |
| 26 <sup>g</sup>    | AgBF <sub>4</sub> /2                              | 98                     | 55                         | 99/1                      |
| 27 <sup>g</sup>    | AgSbF <sub>6</sub> /2                             | 18                     | trace                      | -                         |
| 28 <sup>g, e</sup> | AgBF <sub>4</sub> /2                              | 88                     | 25                         | 84/16                     |
| 29 <sup>g, e</sup> | AgSbF <sub>6</sub> /2                             | 6                      | trace                      | 6                         |

<sup>a</sup>Reaction conditions: **1a** (1.0 mmol), CO (50 bar), H<sub>2</sub>O (2.0 mmol), Pd(OAc)<sub>2</sub> (0.01 mmol), 1,4-dioxane (2.0 mL), 80 °C, 10 h. <sup>b</sup>Conversion of **1a** was determined by GC using dodecane as an internal standard. <sup>c</sup>Yield and ratio of *iso/n* was determined by <sup>1</sup>H NMR analysis of the crude reaction mixture using 2,6-dimethylbenzoic acid as an internal standard. <sup>d</sup>Isolated yield. <sup>e</sup>Fe(NTf)<sub>3</sub> made from FeCl<sub>3</sub> and AgNTf<sub>2</sub>; <sup>f</sup>Al(NTf)<sub>3</sub> made from AlCl<sub>3</sub> and AgNTf<sub>2</sub>. NTf = trifluoromethane sulfonimide. PTSA = *p*-Toluenesulfonic acid. <sup>g</sup>PdCl<sub>2</sub> (0.01 mmol). <sup>h</sup>CO (10 bar), H<sub>2</sub>O (1.0 mmol), 120 °C.

Amongst the screened solvents, only 1,4-dioxane or THF was appropriate to reasonable results. When toluene was used, almost no reaction occurred (Table S4, entry 2). Probably, the solubility of water in the solvent is critical for the initiation of the reaction.

**Table S4** Solvent effect on Pd-catalyzed hydroxycarbonylation of **1a**<sup>a</sup>

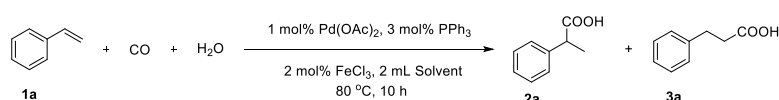

| Entry | Solvent/x mL         | Conv. (%) <sup>b</sup> | Yield (%) <sup>c</sup> | <i>iso/n</i> <sup>c</sup> |
|-------|----------------------|------------------------|------------------------|---------------------------|
| 1     | 1,4-dioxane/2        | 100                    | 96 (91) <sup>d</sup>   | >99/1                     |
| 2     | Toluene/2            | 35                     | trace                  | -                         |
| 3     | THF/2                | 99                     | 76                     | 96/4                      |
| 4     | CH <sub>3</sub> CN/2 | 17                     | trace                  | -                         |
| 5     | DMF/2                | 15                     | trace                  | -                         |
| 6     | DCE/2                | 99                     | 18                     | 92/8                      |

<sup>a</sup>Reaction conditions: **1a** (1.0 mmol), CO (50 bar), H<sub>2</sub>O (2.0 mmol), Pd(OAc)<sub>2</sub> (0.01 mmol), solvent (2.0 mL), 80 °C, 10 h. <sup>b</sup>Conversion of **1a** was determined by GC using dodecane as an internal standard. <sup>c</sup>Yield and ratio of *iso/n* was determined by <sup>1</sup>H NMR analysis of the crude reaction mixture using 2,6-dimethylbenzoic acid as an internal standard. <sup>d</sup>Isolated yield. THF = Tetrahydrofuran. DMF = N,N-Dimethylformamide. DCE = 1,2-Dichloroethane.

When FeCl<sub>3</sub> was used, high CO pressures are favorable. Specifically, *iso*-selectivity decreased to 58% with 1 bar of CO (Table S5, entry 4).

**Table S5** Pressure effect on Pd-catalyzed hydroxycarbonylation of **1a**<sup>a</sup>

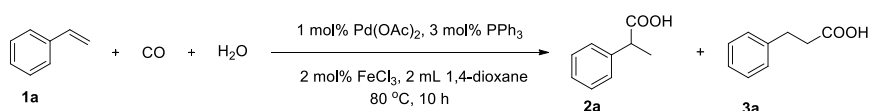

| Entry | CO (bar) | Conv. (%) <sup>b</sup> | Yield (%) <sup>c</sup> | <i>iso/n</i> <sup>c</sup> |
|-------|----------|------------------------|------------------------|---------------------------|
| 1     | 50       | 100                    | 96 (91) <sup>d</sup>   | >99/1                     |
| 2     | 30       | 99                     | 98                     | 93/7                      |
| 3     | 10       | 62                     | 55                     | 93/7                      |
| 4     | 1        | 14                     | 8                      | 58/42                     |

<sup>a</sup>Reaction conditions: **1a** (1.0 mmol), CO, H<sub>2</sub>O (2 mmol), Pd(OAc)<sub>2</sub> (0.01 mmol), 1,4-dioxane (2.0 mL), 80 °C, 10 h. <sup>b</sup>Conversion of **1a** was determined by GC using dodecane as an internal standard. <sup>c</sup>Yield and ratio of *iso/n* was determined by <sup>1</sup>H NMR analysis of the crude reaction mixture using 2,6-dimethylbenzoic acid as an internal standard. <sup>d</sup>Isolated yield.

When FeCl<sub>3</sub> was used, different temperature was screened, and it was found that 80 °C are favorable. (Table S6).

**Table S6** Temperature effect on Pd-catalyzed hydroxycarbonylation of **1a**<sup>a</sup>

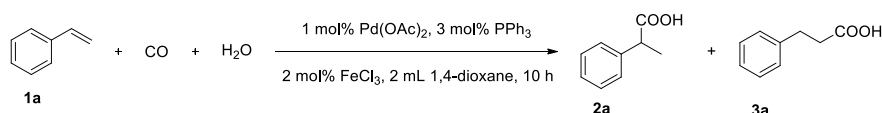

| Entry | T (°C) | Conv. (%) <sup>b</sup> | Yield (%) <sup>c</sup> | <i>iso/n</i> <sup>c</sup> |
|-------|--------|------------------------|------------------------|---------------------------|
| 1     | 50     | 40                     | 21                     | >99/1                     |
| 2     | 80     | 100                    | 96 (91) <sup>d</sup>   | >99/1                     |
| 3     | 120    | 100                    | 85                     | 93/7                      |

<sup>a</sup>Reaction conditions: **1a** (1.0 mmol), CO (50 bar), H<sub>2</sub>O (2 mmol), Pd(OAc)<sub>2</sub> (0.01 mmol), 1,4-dioxane (2.0 mL), 10 h. <sup>b</sup>Conversion of **1a** was determined by GC using dodecane as an internal standard. <sup>c</sup>Yield and ratio of *iso/n* was determined by <sup>1</sup>H NMR analysis of the crude reaction mixture using 2,6-dimethylbenzoic acid as an internal standard. <sup>d</sup>Isolated yield.

Different metal triflates were screened, and it was found that similar regioselectivity was observed in many cases (Table S7).

**Table S7** Additive effect on Pd-catalyzed hydroxycarbonylation of **1a**<sup>a</sup>

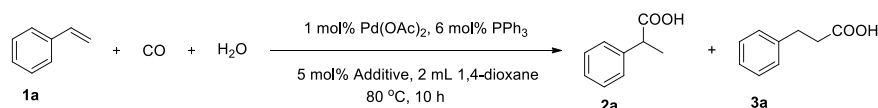

| Entry | Additive/x mol%                                         | Conv. (%) <sup>b</sup> | Yield (%) <sup>c</sup> | <i>iso/n</i> <sup>c</sup> |
|-------|---------------------------------------------------------|------------------------|------------------------|---------------------------|
| 1     | Fe(OTf) <sub>3</sub> /5                                 | 71                     | 66                     | 23/77                     |
| 2     | Fe(OTf) <sub>3</sub> /2                                 | 28                     | 27                     | 41/59                     |
| 3     | Zn(OTf) <sub>2</sub> /10                                | 34                     | 23                     | 23/77                     |
| 4     | Cu(OTf) <sub>2</sub> /10                                | 22                     | 11                     | 23/77                     |
| 5     | LiOTf/10                                                | 19                     | 8                      | 44/56                     |
| 6     | KOTf/10                                                 | 2                      | 0                      | -                         |
| 7     | NaOTf/10                                                | 5                      | 0                      | -                         |
| 8     | Fe(BF <sub>4</sub> ) <sub>2</sub> ·6H <sub>2</sub> O/10 | 6                      | trace                  | -                         |

<sup>a</sup>Reaction conditions: **1a** (1.0 mmol), CO (10 bar), H<sub>2</sub>O (2 mmol), Pd(OAc)<sub>2</sub> (0.01 mmol), 1,4-dioxane (2.0 mL), 80 °C, 10 h. <sup>b</sup>Conversion was determined by GC using dodecane as an internal standard. <sup>c</sup>Yield and ratio of *iso/n* was determined by <sup>1</sup>H NMR analysis of the crude reaction mixture using 2,6-dimethylbenzoic acid as an internal standard. <sup>d</sup>**1a** (1.0 mmol), CO (10 bar), H<sub>2</sub>O (1 mmol), PdCl<sub>2</sub> (0.01 mmol), 1,4-dioxane (2.0 mL), 120 °C, 10 h.

The highest *n*-selectivity was obtained with 10 bar of CO (71%; Table S8, entry 3). Moreover, when 6 mol% PPh<sub>3</sub> was used with 10 bar of CO, linear product **3a** was generated as the major product (77% selectivity; Table S8, entry 4).

**Table S8** Pressure effect on Pd-catalyzed hydroxycarbonylation of **1a**<sup>a</sup>

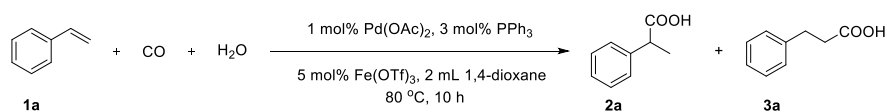

| Entry          | CO (bar) | Conv. (%) <sup>b</sup> | Yield (%) <sup>c</sup> | <i>iso/n</i> <sup>c</sup> |
|----------------|----------|------------------------|------------------------|---------------------------|
| 1              | 50       | 70                     | 59                     | 33/67                     |
| 2              | 30       | 68                     | 61                     | 33/67                     |
| 3              | 10       | 61                     | 60                     | 29/71                     |
| 4 <sup>d</sup> | 10       | 71                     | 66                     | 23/77                     |
| 5              | 1        | 21                     | 11                     | 41/59                     |

<sup>a</sup>Reaction conditions: **1a** (1.0 mmol), H<sub>2</sub>O (2 mmol), Pd(OAc)<sub>2</sub> (0.01 mmol), 1,4-dioxane (2.0 mL), 80 °C, 10 h. <sup>b</sup>Conversion of **1a** was determined by GC using dodecane as an internal standard. <sup>c</sup>Yield and ratio of *iso/n* was determined by <sup>1</sup>H NMR analysis of the crude reaction mixture using 2,6-dimethylbenzoic acid as an internal standard. <sup>d</sup>6 mol% PPh<sub>3</sub>.

When Fe(OTf)<sub>3</sub> was used, different temperature was screened, and it was found that 120 °C are favorable (Table S9, entry2).

**Table S9** Temperature effect on Pd-catalyzed hydroxycarbonylation of **1a**<sup>a</sup>

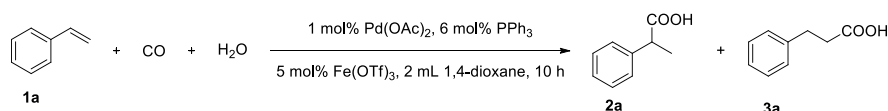

| Entry | T (°C) | Conv. (%) <sup>b</sup> | Yield (%) <sup>c</sup> | <i>iso/n</i> <sup>c</sup> |
|-------|--------|------------------------|------------------------|---------------------------|
| 1     | 80     | 71                     | 66                     | 23/77                     |
| 2     | 120    | 100                    | 90                     | 24/76                     |
| 3     | 140    | 100                    | 49                     | 18/82                     |

<sup>a</sup>Reaction conditions: **1a** (1.0 mmol), CO (10 bar), H<sub>2</sub>O (2 mmol), Pd(OAc)<sub>2</sub> (0.01 mmol), 1,4-dioxane (2.0 mL), 10 h. <sup>b</sup>Conversion of **1a** was determined by GC using dodecane as an internal standard. <sup>c</sup>Yield and ratio of *iso/n* was determined by <sup>1</sup>H NMR analysis of the crude reaction mixture using 2,6-dimethylbenzoic acid as an internal standard.



When Fe(OTf)<sub>3</sub> was used, the highest *n*-selectivity was obtained with 1 mmol H<sub>2</sub>O (85%; Table S10, entry1).

**Table S10** Investigation of the amounts of H<sub>2</sub>O<sup>a</sup>

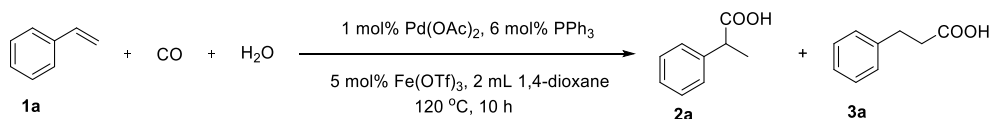

| Entry | H <sub>2</sub> O/x mmol | Conv. (%) <sup>b</sup> | Yield (%) <sup>c</sup> | <i>iso/n</i> <sup>c</sup> |
|-------|-------------------------|------------------------|------------------------|---------------------------|
| 1     | H <sub>2</sub> O/1      | 92                     | 82(75) <sup>d</sup>    | 15/85                     |
| 2     | H <sub>2</sub> O/2      | 100                    | 90                     | 24/76                     |
| 3     | H <sub>2</sub> O/3      | 100                    | 93                     | 21/79                     |

<sup>a</sup>Reaction conditions: **1a** (1.0 mmol), CO (10 bar), H<sub>2</sub>O, Pd(OAc)<sub>2</sub> (0.01 mmol), 1,4-dioxane (2.0 mL), 120 °C, 10 h. <sup>b</sup>Conversion of **1a** was determined by GC using dodecane as an internal standard. <sup>c</sup>Yield and ratio of *iso/n* was determined by <sup>1</sup>H NMR analysis of the crude reaction mixture using 2,6-dimethylbenzoic acid as an internal standard. <sup>d</sup>Isolated yield.

In carbonylation of 1-phenylethanol, it was found that the addition of PTSA is essential for the reactivity in the presence of 2,2'-dipyridine. When further adding Fe(OTs)<sub>3</sub>, higher yield of 93% and *n*-selectivity of 94% were obtained (Table S11, entry 1-2). Interestingly, when FeBr<sub>3</sub> was used, the inverted *iso*-regioselectivity was obtained (87%; Table S11, entry 3).

**Table S11** Palladium-catalyzed hydroxycarbonylation of alcohol<sup>a</sup>

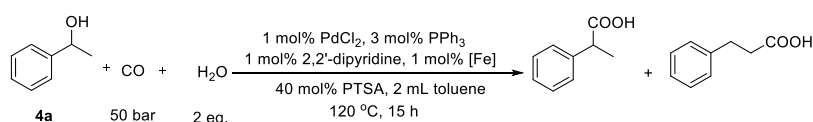

| Entry | Additive 1 (40 mol%) | Additive 2 (1 mol%)        | Yield (%) <sup>b</sup> | <i>iso/n</i> <sup>b</sup> |
|-------|----------------------|----------------------------|------------------------|---------------------------|
| 1     | PTSA                 | -                          | 79                     | 18/82                     |
| 2     | PTSA                 | Fe(OTs) <sub>3</sub>       | 93(90) <sup>c</sup>    | 6/94                      |
| 3     | PTSA                 | FeBr <sub>3</sub>          | 95(91) <sup>c</sup>    | 87/13                     |
| 4     | PTSA                 | FeCl <sub>3</sub>          | 85                     | 22/78                     |
| 5     | PTSA                 | Fe(OTf) <sub>3</sub>       | 5                      | 15/85                     |
| 6     | PTSA                 | FeBr <sub>3</sub> (3 mol%) | 20                     | 93/7                      |

<sup>a</sup>Conditions: 1 mol% PdCl<sub>2</sub>, 3 mol% PPh<sub>3</sub>, 1 mol% 2,2'-dipyridyl were added into 2 mL of toluene followed by stirring at R.T. for 10 min; then **4a**, 40 mol% PTSA and Fe salts were added. <sup>b</sup>Yield and *iso/n* value were determined by <sup>1</sup>H NMR analysis of the crude reaction mixture using 2,6-dimethylbenzoic acid as an internal standard. <sup>c</sup>Isolated yield. OTs = tosylate.

### 3. Mechanism study

#### UV-Vis for Pd-Fe interaction study

To figure out (if there is any) the interaction of iron (III) cation with Pd center, UV-Vis spectroscopic studies were performed in water in the absence/presence of HCl or HOTf to compare the spectra between PdCl<sub>2</sub> and FeCl<sub>3</sub>/PdCl<sub>2</sub> as long as Pd(OTf)<sub>2</sub> and Pd(OTf)<sub>2</sub>/Fe(OTf)<sub>3</sub>, respectively. Even though no clear change could be observed after the addition of FeCl<sub>3</sub> (and HCl) to the solution of PdCl<sub>2</sub> (Figure S1, left), Fe(OTf)<sub>3</sub> caused the red shift of the signal of Pd(OTf)<sub>2</sub> by 5 nm (Figure S1, right). This might be due to the fact that cationic Pd(II) center is more prone to be affected by the coordinated H<sub>2</sub>O exposed to acidic sites of the aquo Fe(III) cations. Hence, the electronic property of Pd(II) center is influenced by Fe(III) salts in the presence of water.

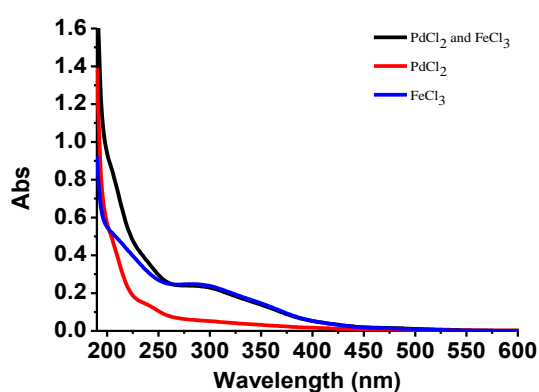

**Figure S1.** The interaction between PdCl<sub>2</sub> and FeCl<sub>3</sub> was studied by UV-Vis spectroscopy. UV-vis spectra of PdCl<sub>2</sub>, FeCl<sub>3</sub>; All spectra were measured in H<sub>2</sub>O solution at 25 °C and the concentrations of PdCl<sub>2</sub>, FeCl<sub>3</sub> are used 0.63 mM, 63 mM, respectively.

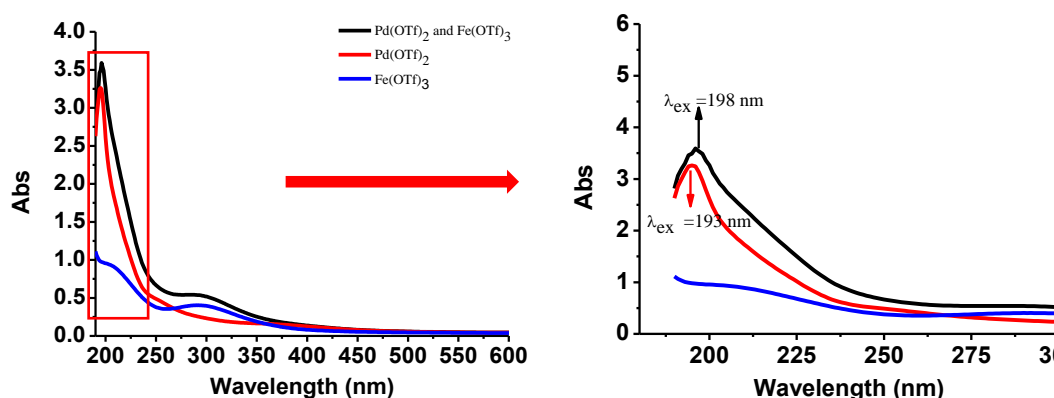

**Figure S2.** The interaction between Pd(OTf)<sub>2</sub> and Fe(OTf)<sub>3</sub> was studied by UV-Vis spectroscopy. UV-Vis spectra of Pd(OTf)<sub>2</sub>, Fe(OTf)<sub>3</sub>; All spectra were measured in H<sub>2</sub>O solution at 25 °C and the concentrations of Pd(OTf)<sub>2</sub>, Fe(OTf)<sub>3</sub> are used 1.3 mM, 0.28 mM, respectively.

## Reaction profiles

Experimental procedure I: The Pd(OAc)<sub>2</sub> (0.01 mmol, 2.2 mg), PPh<sub>3</sub> (0.03 mmol, 7.8 mg), FeCl<sub>3</sub> (0.02 mmol, 3.2 mg, ○) or HCl (0.06 mmol, Δ), 1,4-dioxane (2 mL), **1a** (104 mg, 1.0 mmol), dodecane (25 mg) and a stirring bar were added into a vial (25 mL) in glovebox. After sealed, the vial was brought out of the glovebox followed by addition of H<sub>2</sub>O (2 mmol, 36 μL) with syringe under nitrogen atmosphere. The vial was transferred into an autoclave (25 mL) under nitrogen atmosphere. At room temperature, the autoclave was flushed with CO gas for five times and pressurized with CO gas to 50 bar. The reaction was performed at 80 °C. At different time, the yield and conversion was determined by GC using dodecane as an internal standard.

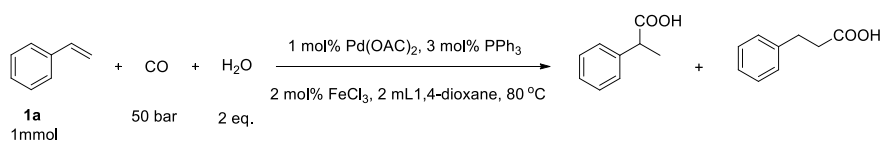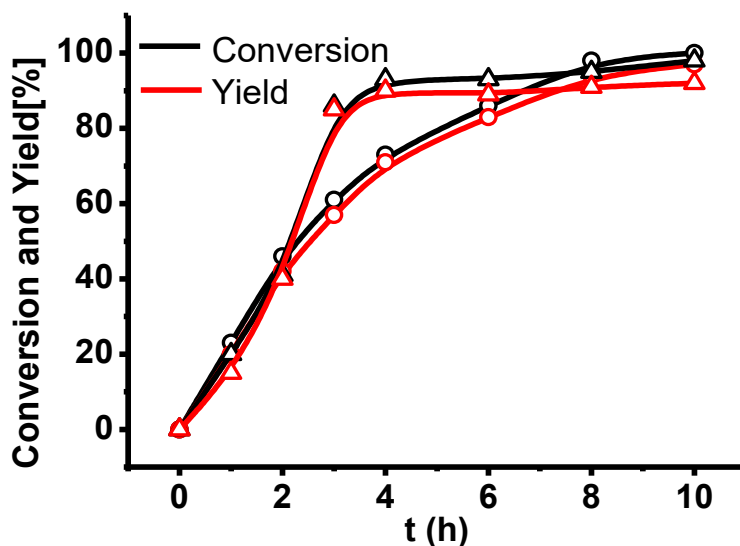

**Figure S3.** Kinetics of conversion and yield changes of styrene at standard condition in the presence of CO (50 bar) at different acidic additives [FeCl<sub>3</sub> (0.02 mmol, 3.2 mg, ○) or HCl (0.06 mmol, Δ)].

Experimental procedure II: The Pd(OAc)<sub>2</sub> (0.01 mmol, 2.2 mg), PPh<sub>3</sub> (0.06 mmol, 15.6 mg), Fe(OTf)<sub>3</sub> (0.05 mmol, 26 mg, ○) or HOTf (0.15 mmol, Δ), 1,4-dioxane (2 mL), **1a** (104 mg, 1.0 mmol), dodecane (25 mg) and a stirring bar were added into a vial (25 mL) in glovebox. After sealed, the vial was brought out of the glovebox followed by addition of H<sub>2</sub>O (1 mmol, 18 μL) with syringe under nitrogen atmosphere. The vial was transferred into an autoclave (25 mL) under nitrogen atmosphere. At room temperature, the autoclave was flushed with CO gas for five times and pressurized with CO gas to 10 bar. The reaction was performed at 120 °C. At different time, the yield and conversion was determined by GC using dodecane as an internal standard.

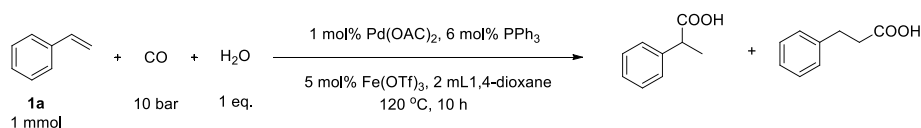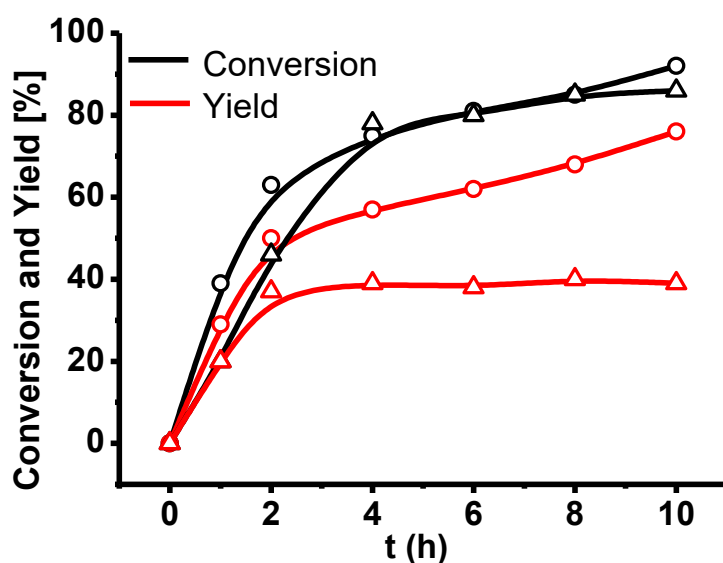

**Figure S4.** Kinetics of conversion and yield changes of styrene at standard condition in the presence of CO (10 bar) at different acidic additives (Fe(OTf)<sub>3</sub> (0.05 mmol, 26 mg, ○) or HOTf (0.15 mmol, Δ)).

## *In situ* NMR study

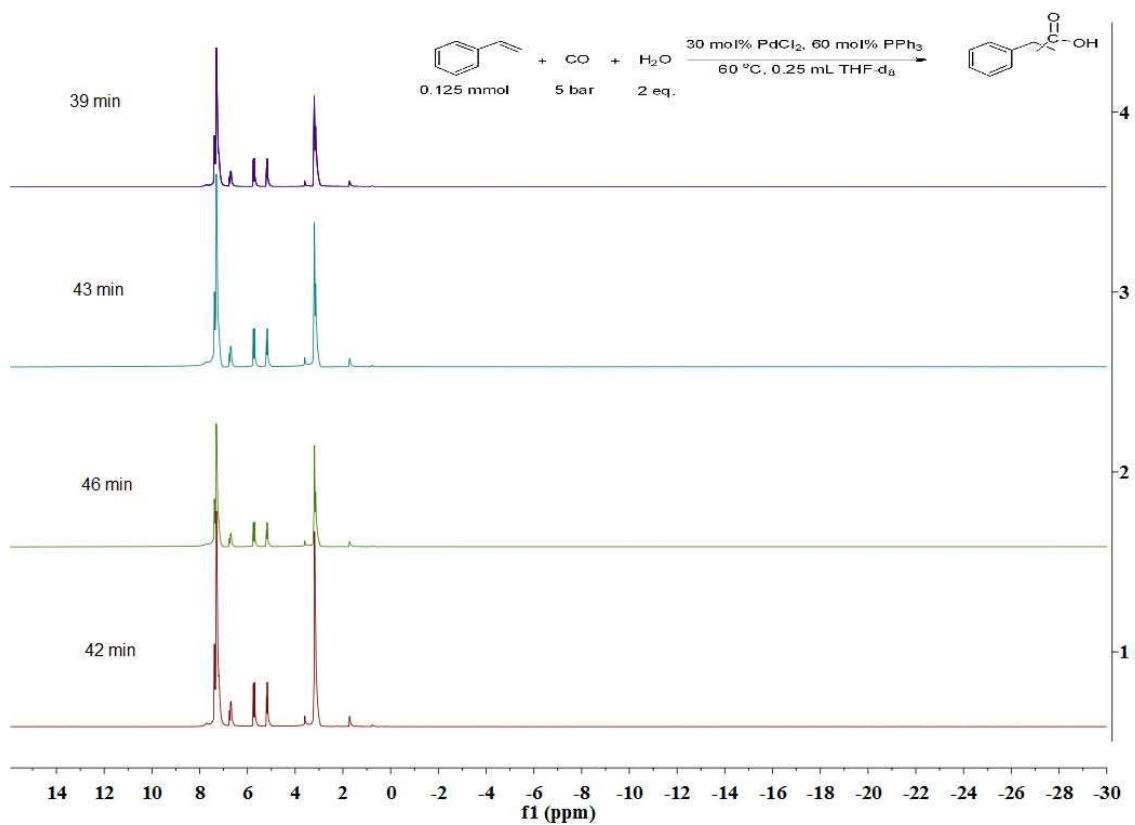

**Figure S5.** *In situ* <sup>1</sup>H NMR spectra

The PdCl<sub>2</sub> (0.037 mmol, 6.6 mg), PPh<sub>3</sub> (0.075 mmol, 19.8 mg) were added into a NMR tube. Then THF-*d*<sub>8</sub> (0.25 mL), **1a** (13 mg, 0.125 mmol) and H<sub>2</sub>O (0.25 mmol, 5 μL) were injected by syringe. At room temperature, the tube was flushed with CO gas for five times and pressurized with CO gas to 5 bar. At Bruker 400 MHz, the NMR tube was heated to 60 °C. Under such conditions, palladium hydride intermediates (-10 ~ -5 ppm) were not detected.

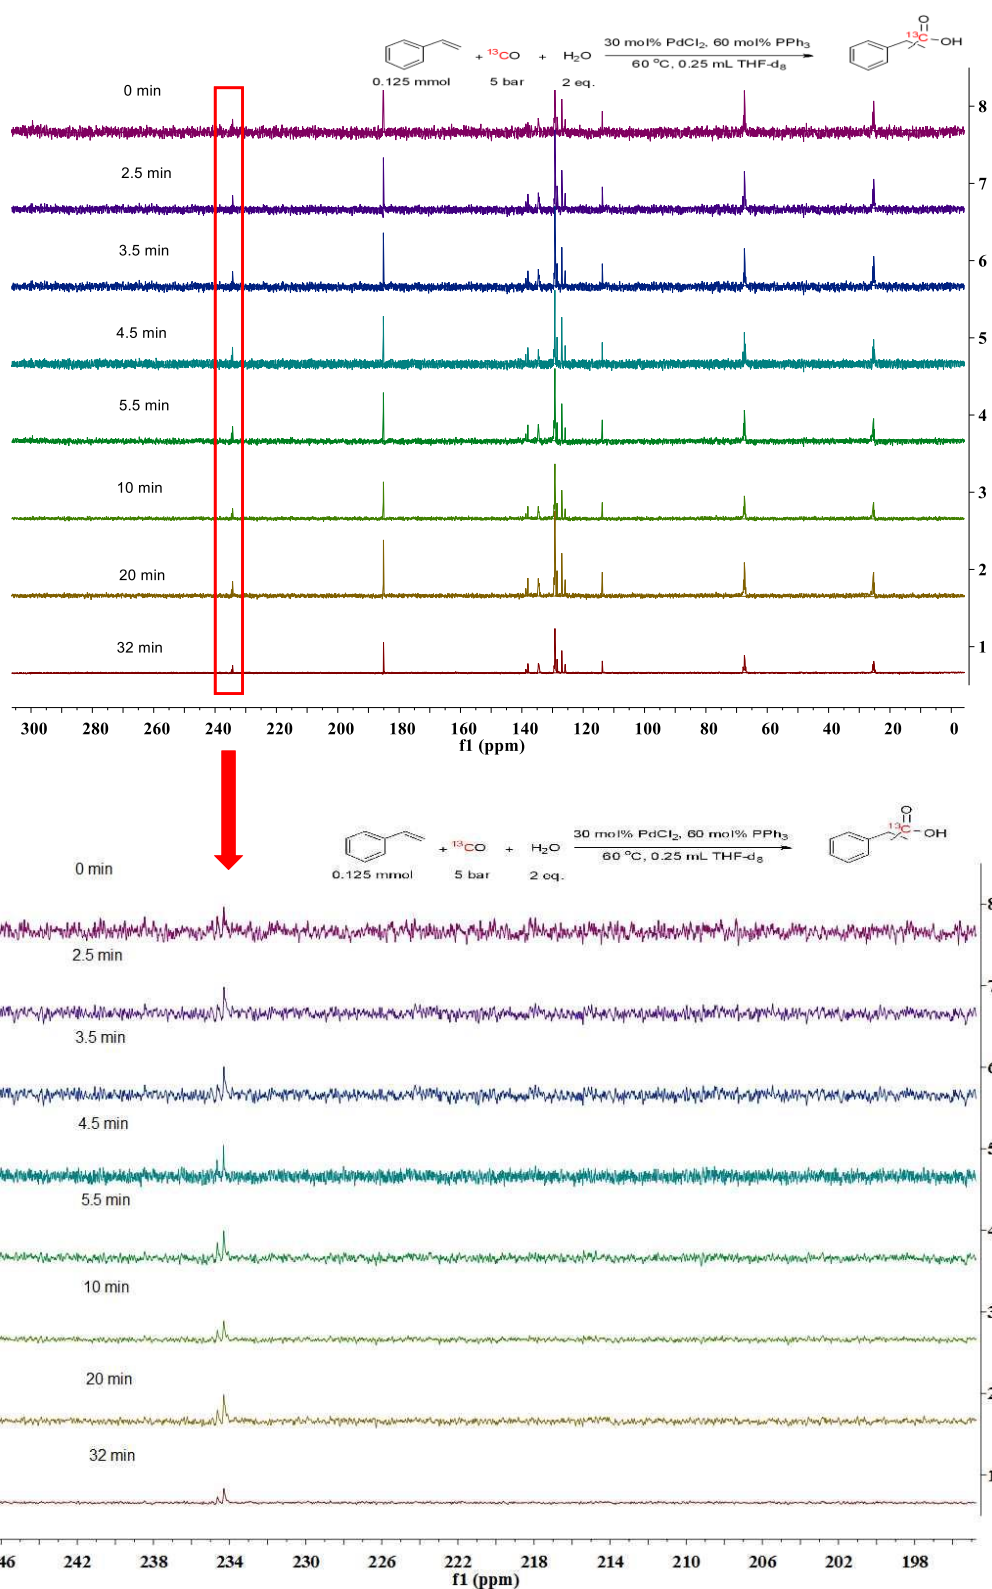

**Figure S6.** *In situ*  $^{13}\text{C}$  NMR spectra

The  $\text{PdCl}_2$  (0.037 mmol, 6.6 mg),  $\text{PPh}_3$  (0.075 mmol, 19.8 mg) were added into a NMR tube in the glovebox. Then  $\text{THF-d}_8$  (0.25 mL), **1a** (13 mg, 0.125 mmol) and  $\text{H}_2\text{O}$  (0.25 mmol, 5  $\mu\text{L}$ ) were injected by syringe. At room temperature, the tube was flushed with CO gas for five times and pressurized with CO gas to 5 bar. At Bruker 400 MHz, the NMR tube was heated to 60 °C. Then the  $^{13}\text{C}$  NMR spectra were collected at different time. Under such conditions, acyl complexes (234.63, 234.29 ppm) were detected.

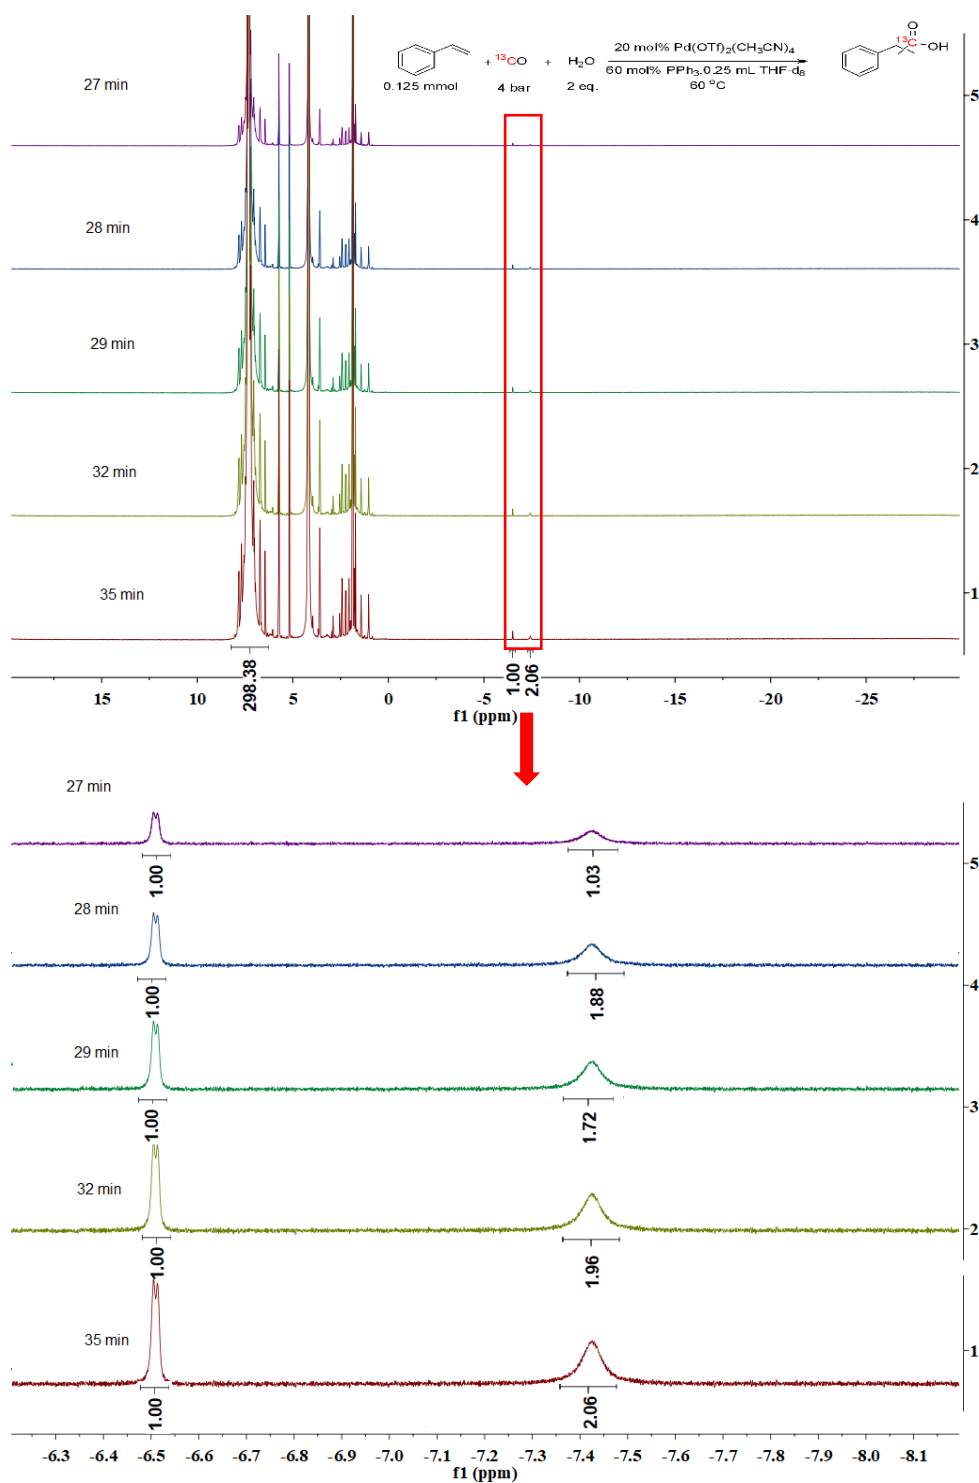

**Figure S7.** *In situ*  $^1\text{H}$  NMR spectra

The  $\text{Pd(OTf)}_2(\text{CH}_3\text{CN})_4$  (0.025 mmol, 14.25 mg),  $\text{PPh}_3$  (0.075 mmol, 19.6 mg) were added into a NMR tube in the glovebox. Then  $\text{THF-}d_8$  (0.25 mL), **1a** (13 mg, 0.125 mmol) and  $\text{H}_2\text{O}$  (5  $\mu\text{L}$ , 0.25 mmol) were injected by syringe. At room temperature, the tube was flushed with  $\text{CO}$  gas for five times and pressurized with  $\text{CO}$  gas to 4 bar. Then, the NMR tube was heated to  $60^\circ\text{C}$  in the Agilent 600 MHz NMR equipment. The  $^1\text{H}$  NMR spectra above were collected at different time. At ca. -6.5 ppm, we can have found a double peak. Besides, we can find the other broad peak at -7.42 ppm.

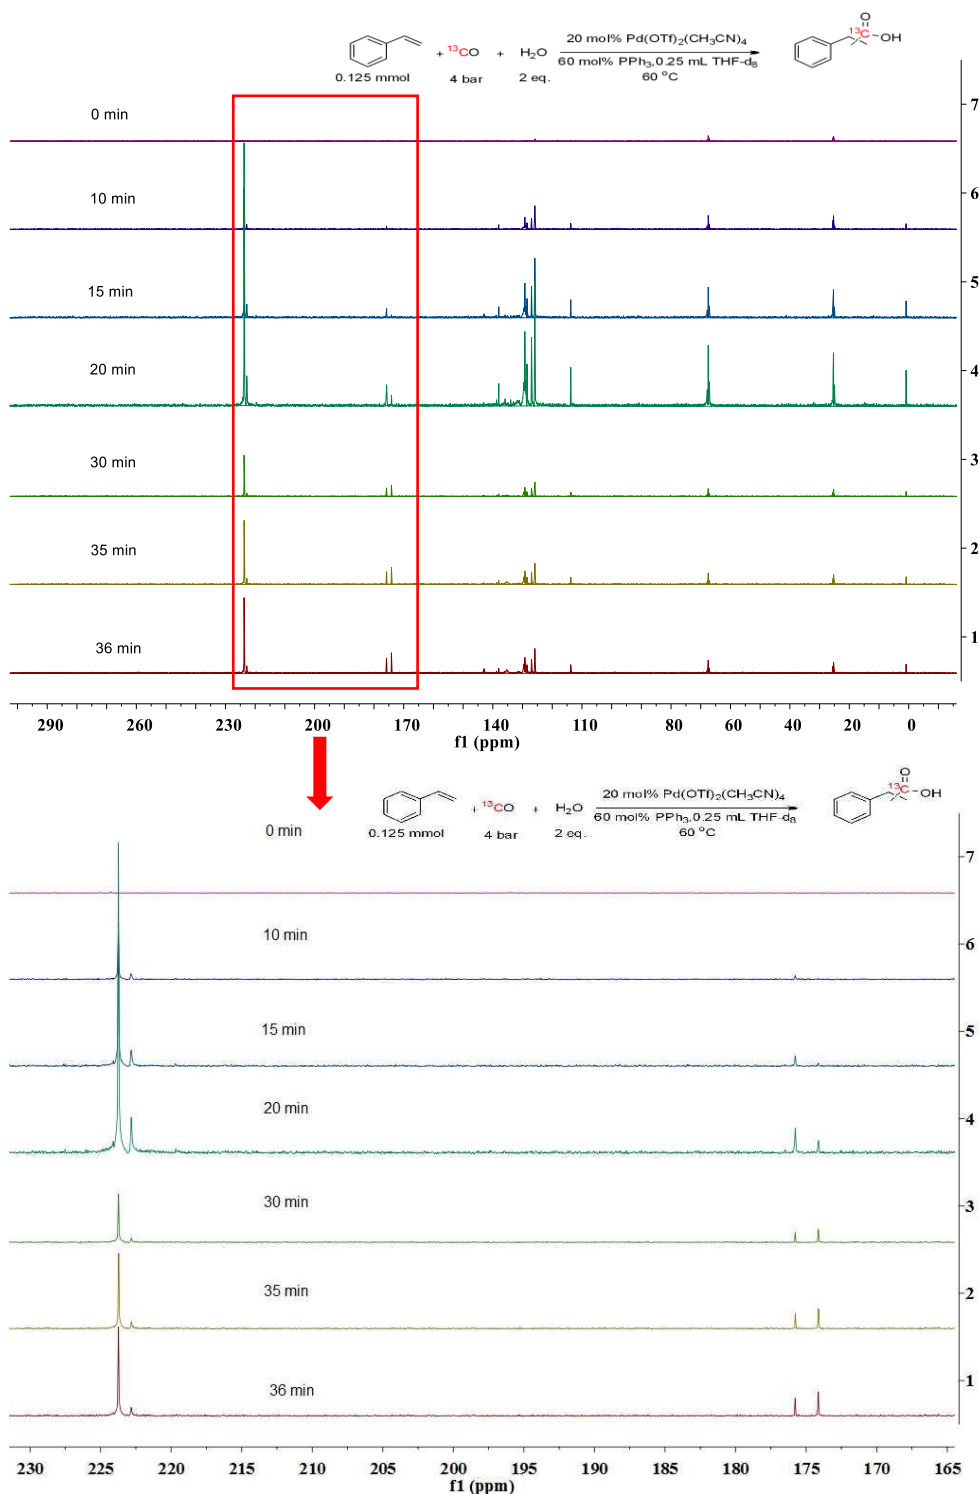

**Figure S8.** *In situ*  $^{13}\text{C}$  NMR spectra

The  $\text{Pd}(\text{OTf})_2(\text{CH}_3\text{CN})_4$  (0.025 mmol, 14.25 mg),  $\text{PPh}_3$  (0.075 mmol, 19.6 mg) were added into a NMR tube. Then  $\text{THF-}d_8$  (0.25 mL), **1a** (13 mg, 0.125 mmol) and  $\text{H}_2\text{O}$  (5  $\mu\text{L}$ , 0.25 mmol) were injected by syringe. At room temperature, the tube was flushed with CO gas for five times and pressurized with CO gas to 4 bar. At Agilent 600 MHz, the NMR tube was heated to 60 °C. Under such conditions, signals of acyl complexes (223.72, 222.82 ppm) were detected. Please also see the magnified spectrum for the changes of spectra.



## Control experiments

**Procedure:** The [Pd] source (0.01 mmol), PPh<sub>3</sub>, additive, 1,4-dioxane (2 mL), **1a** (104 mg, 1.0 mmol) and a stirring bar were added into a vial (5 mL) in glovebox. After sealed, the vial was brought out of the glovebox followed by addition of H<sub>2</sub>O with syringe under nitrogen atmosphere. The vial was transferred into an autoclave (25 mL) under nitrogen atmosphere. At room temperature, the autoclave was flushed with CO gas for five times and pressurized with CO gas. The reaction was performed at 80 °C or 120 °C. After the reaction finished, the autoclave was cooled to room temperature and the pressure was carefully released. Conversion was determined by GC using dodecane as an internal standard. The yield and regioselectivity were measured by <sup>1</sup>H NMR analysis of the crude reaction mixture using 2,6-dimethylbenzoic acid as an internal standard.

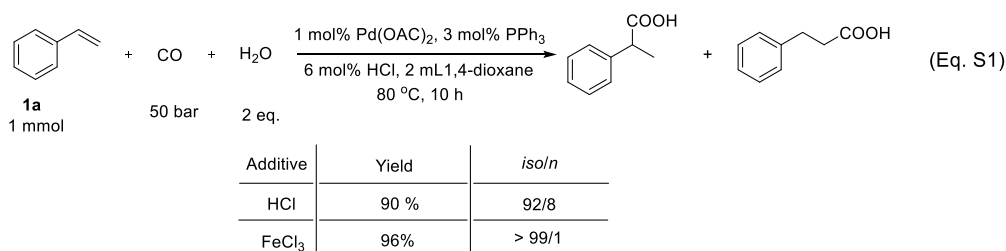

As shown in Equation S1, when 6 mol% HCl was used, the *iso/n* ratio decreased to 92/8.

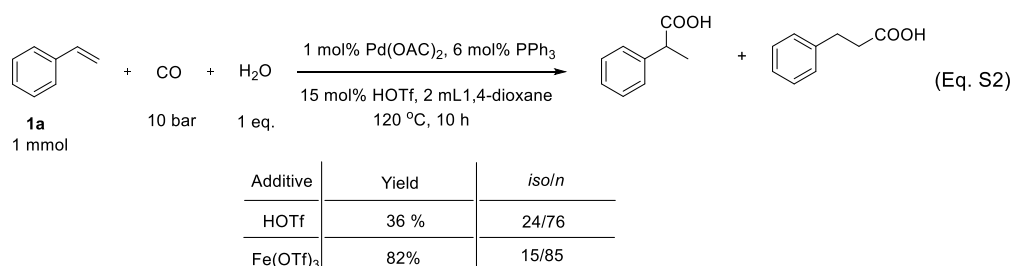

When 15 mol% HOTf was used, branch regioselectivity and the product yield of 36% were obtained.

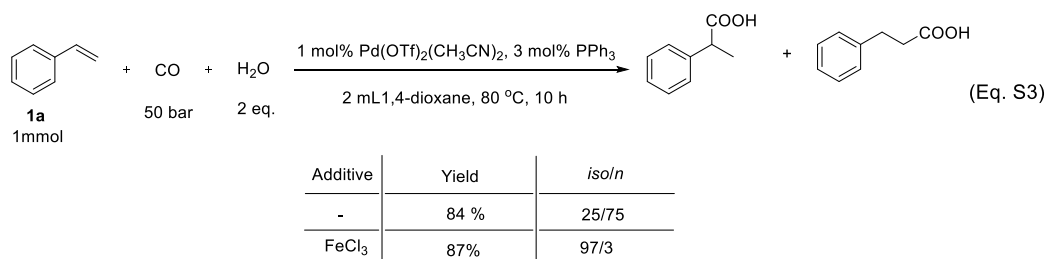

Here, when Pd(OTf)<sub>2</sub>(CH<sub>3</sub>CN) was used as the precursor, the addition of FeCl<sub>3</sub> led to regioselectivity inversion from 25/75 to 97/3 (*iso/n*).

## Scale-up reaction

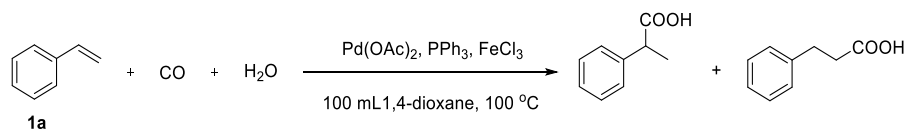

Conversion: 51%, Yield: 40%, *iso/n* > 99/1

**Procedure:** The Pd(OAc)<sub>2</sub> (0.01 mmol, 2.2 mg), PPh<sub>3</sub> (0.15 mmol, 39.5 mg), FeCl<sub>3</sub> (1.28 mmol, 208 mg), 1,4-dioxane (100 mL), **1a** (62400 mg, 600.0 mmol) and a stirring bar were added into a vial (250 mL) in glovebox. After sealed, the vial was brought out of the glovebox followed by addition of H<sub>2</sub>O with syringe under nitrogen atmosphere. The vial was placed in an alloyed plate, which was then transferred into an autoclave (250 mL) under nitrogen atmosphere. At room temperature, the autoclave was flushed with CO gas for five times and pressurized with CO gas to 50 bar. The reaction was performed at 100 °C for 51.5 h. After the reaction finished, the autoclave was cooled to room temperature and the pressure was carefully released. Conversion was determined by GC using dodecane as an internal standard. The yield and regioselectivity were measured by <sup>1</sup>H NMR analysis of the crude reaction mixture using 2,6-dimethylbenzoic acid as an internal standard. (Turnover Number (TON) = 24,000, Turnover Frequency (TOF): 24000/51.5 = 466.0 h<sup>-1</sup>).

**Table S12** Measuring pH value by pH meter

| Entry | [Fe]/x mmol                | H <sub>2</sub> O (mmol) | 1,4-dioxane (mL) | pH  |
|-------|----------------------------|-------------------------|------------------|-----|
| 1     | FeCl <sub>3</sub> /0.02    | 2                       | 2                | 1.7 |
| 2     | Fe(OTf) <sub>3</sub> /0.05 | 1                       | 2                | 1.1 |

**Procedure for pH measurement:** The FeCl<sub>3</sub> (0.02 mmol, 3.2 mg) or Fe(OTf)<sub>3</sub> (0.05 mmol, 26 mg), 1,4-dioxane (2 mL) were added into a vial (25 mL) in glovebox. Then H<sub>2</sub>O (1 mmol or 2 mmol) was injected into the vial by syringe under nitrogen atmosphere. At 25 °C, the pH of mixture solutions were measured by pH meter (PHS-2F; Shanghai INESA).

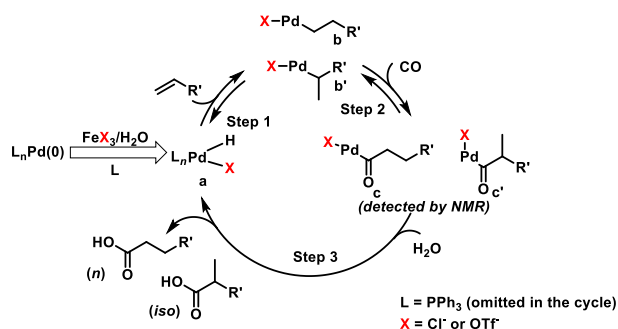

**Catalyst activation:** the use of FeX<sub>3</sub> in the presence of H<sub>2</sub>O leads to 1) slow release of proton; 2) suppress the cluster formation;

**Step 1:** DFT calculations clearly reveal the anion effect on the step 1. In situ NMR, Pd-H hydride signals can be observed for the reaction using Pd(OTf)<sub>2</sub>;

**Step 2:** Insertion of CO to generate acyl Pd(II) species, Pd-acyl signals can be detected for both neutral and cationic Pd-systems under heating conditions;

**Step 3:** Nucleophilic addition of the water to the palladium-acyl complexes to give product (hydrolysis of Pd-acyl species) is the rate-determining step.

**Scheme S1.** Proposed mechanism

## Computational details

All calculations were performed by Gaussian 09 D.01<sup>[1]</sup> using the range-separated hybrid WB97XD functional including dispersion correction. The dispersion correction has been proved to be critical in describing the regioselectivity of Pd-catalyzed alkoxycarbonylation reactions.<sup>[2]</sup> For geometry optimizations, we used double-zeta polarized basis set 6-31g(d) for C, H, P, Cl atoms and Lanl2dz for Pd atom (WB97XD/B1). Frequency calculations at the same level were calculated to verify either local minima or transition states and to estimate the thermal corrections Gibbs free energy at 298K. Then, single-point energies of the optimized structures was calculated with a larger triple-zeta basis set 6-311+G(d,p) (WB97XD/B2) for all atoms except Pd (Lanl2dz for Pd). Also, we carried out self-consistent reaction field (SCRF) single-point energies at WB97XD/B2 level to estimate the solvation effect (WB97XD-SCRF/B2). The polarizable continuum model (PCM) was used with 1,4-dioxane as a solvent. The Gibbs free energies ( $\Delta G$ ) used for our energetic discussions were estimated by sum of the single-point energies at WB97XD/B2 level and thermal corrections at 298K from frequency analysis.

To reveal the anion effect on the olefin insertion into Pd-H bond, we used  $L_2PdHCl$  and  $[L_2PdH]^+$  (L=triphenyl phosphine) complexes as model catalysts to compare the different effect of  $Cl^-$  and  $OTf^-$  ( $OMs^-$ ,  $OTs^-$ , etc.), respectively. Styrene was chosen as the substrate. We firstly got the optimized structures of  $L_2PdHCl$  and  $[L_2Pd]^+$ , both of which Pd adopt a square planar coordination geometry. Then we studied the coordination of styrene to the two [Pd] catalysts. The most stable conformations can be found in Figure S9 and Figure S10. It is shown that in  $[L_2PdH(styrene)]^+$  complex, C=C double bond of styrene is roughly perpendicular to the Pd-H bond, and styrene approaches the square planar of  $L_2PdHCl$  almost parallel with vinyl pointing toward Cl. Subsequently, we located the transition states of the Pd-H insertion to the C=C double bond of styrene for each catalyst with Berny algorithm encoded in G09. Two distinct insertion routes have been investigated: I) H transfer from Pd to the distal C atom of the double bond leading to a  $[L_2Pd(iso\text{-phenylethyl})]X$  ( $X=Cl$  or  $+$ ) intermediate that will finally produce the branched product; II) H transfer from Pd to the proximal C atom of the double bond leading to a  $[L_2Pd(n\text{-phenylethyl})]X$  ( $X=Cl$  or  $+$ ) intermediate that will finally produce the linear product. Transition states with different configurations have been located for each route and we only chose the most stable transition states for discussion and comparison.

As shown in Figure S9, the Pd-H insertion of  $L_2PdHCl$  to styrene has an energy barrier about 10.41 (8.99) kcal/mol via Path I (TS1) and 15.92 (13.96) kcal/mol via Path II (TS2). This barrier discrepancy (more or less -5 kcal/mol) corresponds to an expected *iso/n* regioselectivity about 100/0 according to Arrhenius equation, in good agreement with the experimentally observed regioselectivity when the chloride salts were used as co-catalyst. Seen from Figure S10, the Pd-H insertion of  $[L_2PdH]^+$  to styrene has an energy barrier about 5.83 kcal/mol via Path I (TS1) and 5.49 kcal/mol via Path II (TS2) with the solvation effect included. Such a barrier discrepancy (0.34 kcal/mol) corresponds to an *iso/n* regioselectivity nearly 39/61. It coincides very well with the observed regioselectivity in the presence of  $Fe(OTs)_3$ . Our calculations indeed reproduce the observed anion effect on the regioselectivity.

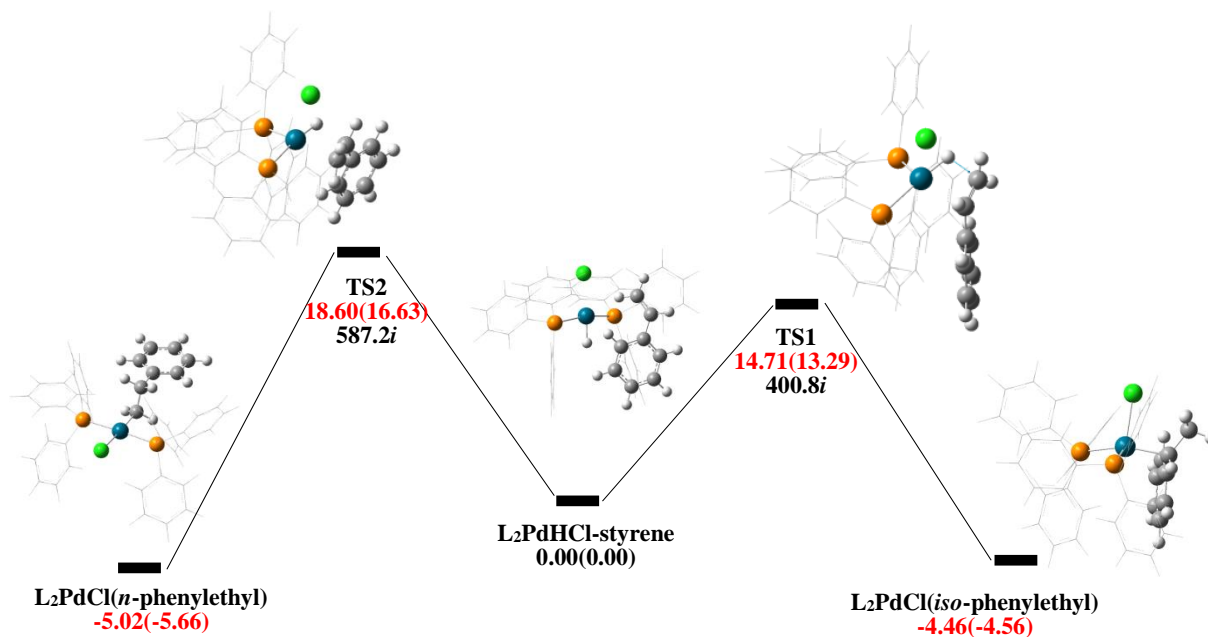

**Figure S9** Calculated Gibbs free energies of Pd-H insertion into styrene in L<sub>2</sub>PdHCl-styrene complex at WB97XD/B2 (WB97XD-SCRF/B2) level.

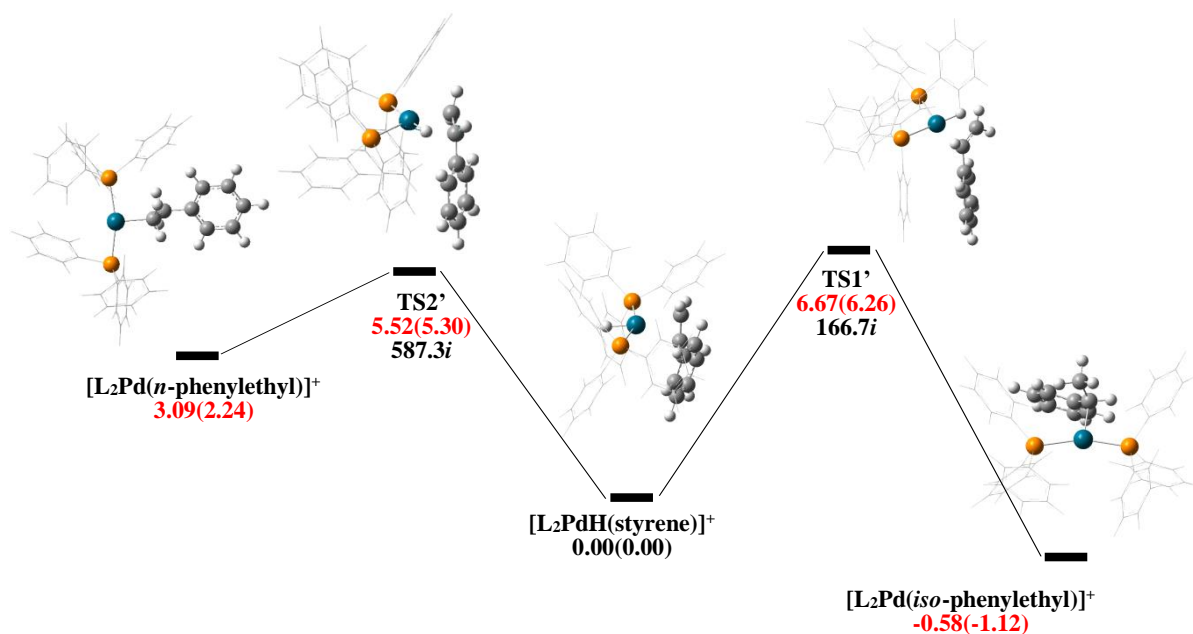

**Figure S10** Calculated Gibbs free energies of Pd-H insertion into styrene in [L<sub>2</sub>PdH(styrene)]<sup>+</sup> complex at WB97XD/B2 (WB97XD-SCRF/B2) level.

Optimized Cartesian coordinates involved in Figure S9 and Figure S10

| L <sub>2</sub> PdHCl-styreen |            |            |            | TS1 |            |            |            |
|------------------------------|------------|------------|------------|-----|------------|------------|------------|
| C                            | 0.2991900  | -3.6584240 | 0.7698280  | C   | 1.6281880  | -1.3657190 | -2.4015230 |
| C                            | -0.6741160 | -4.3904990 | 1.4470820  | C   | 0.4793710  | -1.7091440 | -3.0876940 |
| C                            | -1.9167700 | -4.5997670 | 0.8518410  | Pd  | -0.0860280 | -0.1834770 | -1.3039010 |
| C                            | -2.1776380 | -4.0848990 | -0.4134110 | Cl  | 0.0213650  | 1.6329930  | -3.4012830 |
| C                            | -1.2106160 | -3.3464200 | -1.1074700 | P   | 1.3716230  | 0.9528040  | 0.2327580  |
| C                            | 0.0330900  | -3.1435790 | -0.4949950 | C   | 3.1147870  | 1.0965480  | -0.3181910 |
| Pd                           | 0.1534090  | 0.4425850  | -0.1328160 | C   | 4.2228010  | 0.8555390  | 0.4956260  |
| Cl                           | 0.2631930  | 1.8111440  | -2.1594280 | C   | 5.5099850  | 0.9881230  | -0.0198480 |
| P                            | -2.1444110 | 0.7092850  | 0.1835850  | C   | 5.6977540  | 1.3791040  | -1.3425300 |
| C                            | -2.5570530 | 2.4826130  | 0.3262940  | C   | 4.5934700  | 1.6539170  | -2.1479340 |
| C                            | -3.8115860 | 2.9849570  | -0.0335100 | C   | 3.3053360  | 1.5145770  | -1.6415500 |
| C                            | -4.0953500 | 4.3379720  | 0.1251620  | C   | 1.4074820  | 0.0816460  | 1.8434690  |
| C                            | -3.1289290 | 5.1981500  | 0.6405660  | C   | 0.5902370  | 0.4676290  | 2.9115400  |
| C                            | -1.8754190 | 4.7047950  | 0.9928550  | C   | 0.5025300  | -0.3240930 | 4.0541740  |
| C                            | -1.5877710 | 3.3537120  | 0.8318380  | C   | 1.2225690  | -1.5109640 | 4.1473140  |
| C                            | -2.8712450 | -0.0646440 | 1.6761460  | C   | 2.0343170  | -1.9059190 | 3.0860760  |
| C                            | -2.4061270 | -1.3235430 | 2.0680920  | C   | 2.1210150  | -1.1201220 | 1.9426480  |
| C                            | -2.9855450 | -1.9806570 | 3.1485980  | P   | -2.0846990 | -0.3568300 | -0.1488700 |
| C                            | -4.0219960 | -1.3798480 | 3.8585480  | C   | -3.5821850 | 0.0087740  | -1.1263400 |
| C                            | -4.4834100 | -0.1224460 | 3.4782840  | C   | -3.4475140 | 0.5234490  | -2.4182360 |
| C                            | -3.9162420 | 0.5308100  | 2.3877690  | C   | -4.5873700 | 0.8509830  | -3.1525390 |
| P                            | 2.4633240  | 0.1964920  | 0.0686730  | C   | -5.8520120 | 0.6648030  | -2.6056110 |
| C                            | 3.1747020  | 1.7053050  | 0.8214930  | C   | -5.9882520 | 0.1628950  | -1.3105180 |
| C                            | 2.7049000  | 2.9399970  | 0.3551320  | C   | -4.8576920 | -0.1532610 | -0.5687110 |
| C                            | 3.2268190  | 4.1206840  | 0.8726170  | C   | -2.3730560 | 0.6537950  | 1.3503330  |
| C                            | 4.2109370  | 4.0809270  | 1.8582790  | C   | -2.7029530 | 0.1305140  | 2.6013750  |
| C                            | 4.6791550  | 2.8555600  | 2.3233880  | C   | -2.8749370 | 0.9835150  | 3.6898840  |
| C                            | 4.1652530  | 1.6684840  | 1.8061580  | C   | -2.7104060 | 2.3576850  | 3.5390280  |
| C                            | 3.4261080  | -0.0388800 | -1.4634540 | C   | -2.4014860 | 2.8867750  | 2.2865310  |
| C                            | 4.7668990  | 0.3502050  | -1.5509040 | C   | -2.2459160 | 2.0380280  | 1.1977720  |
| C                            | 5.4898850  | 0.1061020  | -2.7137930 | H   | -1.0082240 | -1.0282720 | -2.2750340 |
| C                            | 4.8804810  | -0.5269750 | -3.7952670 | H   | 0.1937270  | -1.1186440 | -3.9531330 |
| C                            | 3.5450980  | -0.9105580 | -3.7150120 | H   | 0.0416520  | -2.6984640 | -2.9817400 |
| C                            | 2.8184320  | -0.6617690 | -2.5551460 | H   | 4.0895810  | 0.5528800  | 1.5294140  |
| H                            | 1.2735620  | -3.4981740 | 1.2203890  | H   | 6.3666700  | 0.7859190  | 0.6166190  |
| H                            | -0.4612800 | -4.8018780 | 2.4297790  | H   | 6.7021700  | 1.4795650  | -1.7436630 |
| H                            | -2.6832990 | -5.1670600 | 1.3723970  | H   | 4.7316560  | 1.9738340  | -3.1762650 |

|   |            |            |            |   |            |            |            |
|---|------------|------------|------------|---|------------|------------|------------|
| H | -3.1471820 | -4.2507760 | -0.8769080 | H | 2.4427060  | 1.7234480  | -2.2766720 |
| H | 0.8105110  | -2.6012880 | -1.0252180 | H | 0.0039880  | 1.3789450  | 2.8551960  |
| H | -4.5639410 | 2.3185410  | -0.4459450 | H | -0.1456460 | -0.0091540 | 4.8662790  |
| H | -5.0704800 | 4.7216310  | -0.1598770 | H | 1.1495350  | -2.1256330 | 5.0397980  |
| H | -3.3496120 | 6.2548620  | 0.7596130  | H | 2.5969700  | -2.8334690 | 3.1346670  |
| H | -1.1141730 | 5.3749940  | 1.3805250  | H | 2.7450760  | -1.4521590 | 1.1214660  |
| H | -0.6002130 | 2.9740080  | 1.0806870  | H | -2.4587510 | 0.7002350  | -2.8409250 |
| H | -1.5911200 | -1.7943230 | 1.5260980  | H | -4.4756310 | 1.2611920  | -4.1513790 |
| H | -2.6165260 | -2.9616250 | 3.4324730  | H | -6.7369100 | 0.9200830  | -3.1817050 |
| H | -4.4673890 | -1.8878340 | 4.7090920  | H | -6.9748300 | 0.0280480  | -0.8772000 |
| H | -5.2884380 | 0.3536560  | 4.0302910  | H | -4.9636940 | -0.5254910 | 0.4473780  |
| H | -4.2859330 | 1.5098150  | 2.0996170  | H | -2.8097830 | -0.9406650 | 2.7380650  |
| H | 1.9386380  | 2.9690490  | -0.4172930 | H | -3.1280330 | 0.5676220  | 4.6608750  |
| H | 2.8600430  | 5.0738040  | 0.5032780  | H | -2.8277560 | 3.0171170  | 4.3939640  |
| H | 4.6131910  | 5.0045520  | 2.2643470  | H | -2.2651230 | 3.9555140  | 2.1541140  |
| H | 5.4466800  | 2.8201980  | 3.0907900  | H | -2.0083010 | 2.4539770  | 0.2242200  |
| H | 4.5356960  | 0.7164710  | 2.1749300  | C | 0.9849880  | 2.7037070  | 0.6037650  |
| H | 5.2447830  | 0.8482100  | -0.7119410 | C | 0.2917990  | 3.4438310  | -0.3578510 |
| H | 6.5289450  | 0.4151320  | -2.7779680 | C | 1.4373570  | 3.3330040  | 1.7681940  |
| H | 5.4447520  | -0.7121510 | -4.7045850 | C | 0.0202460  | 4.7916010  | -0.1319560 |
| H | 3.0604760  | -1.3895280 | -4.5600130 | H | -0.0201550 | 2.9697450  | -1.2889250 |
| H | 1.7694820  | -0.9311880 | -2.5083830 | C | 1.1517570  | 4.6746720  | 1.9943380  |
| C | -3.2070180 | 0.0970350  | -1.1721890 | H | 2.0098780  | 2.7760230  | 2.5043510  |
| C | -3.0861290 | 0.6976720  | -2.4311330 | C | 0.4359230  | 5.4045800  | 1.0466190  |
| C | -4.0769910 | -0.9812620 | -1.0025540 | H | -0.5164360 | 5.3595430  | -0.8859520 |
| C | -3.8417310 | 0.2295110  | -3.4996820 | H | 1.4970110  | 5.1530720  | 2.9061790  |
| H | -2.3795020 | 1.5100440  | -2.5759950 | H | 0.2190760  | 6.4546350  | 1.2214870  |
| C | -4.8197350 | -1.4547880 | -2.0815640 | C | -2.2176690 | -2.0916590 | 0.4192870  |
| H | -4.1725480 | -1.4635670 | -0.0351730 | C | -3.1603950 | -2.9919480 | -0.0790180 |
| C | -4.7069420 | -0.8490830 | -3.3289320 | C | -1.2415650 | -2.5482350 | 1.3153270  |
| H | -3.7418660 | 0.7022770  | -4.4721660 | C | -3.1314270 | -4.3277790 | 0.3199360  |
| H | -5.4937360 | -2.2951580 | -1.9412610 | H | -3.9137730 | -2.6585710 | -0.7859550 |
| H | -5.2903770 | -1.2177060 | -4.1678420 | C | -1.2254560 | -3.8758740 | 1.7227190  |
| C | 3.0219880  | -1.1717310 | 1.1555770  | H | -0.4824920 | -1.8656290 | 1.6852900  |
| C | 2.4995730  | -1.2512650 | 2.4529290  | C | -2.1701220 | -4.7714790 | 1.2225560  |
| C | 3.9117050  | -2.1551410 | 0.7205730  | H | -3.8659200 | -5.0218720 | -0.0777230 |
| C | 2.8732580  | -2.2850450 | 3.3016730  | H | -0.4650030 | -4.2073880 | 2.4236650  |
| H | 1.7860770  | -0.5052170 | 2.7924900  | H | -2.1528290 | -5.8124810 | 1.5315870  |
| C | 4.2707010  | -3.2036540 | 1.5676040  | H | 2.1946510  | -0.5188170 | -2.7774360 |
| H | 4.3263380  | -2.1122500 | -0.2812710 | C | 2.3172470  | -2.2581560 | -1.4473130 |

|     |            |            |            |                                               |            |            |            |
|-----|------------|------------|------------|-----------------------------------------------|------------|------------|------------|
| C   | 3.7569750  | -3.2692900 | 2.8576840  | C                                             | 3.6931100  | -2.1024300 | -1.2416240 |
| H   | 2.4614510  | -2.3328900 | 4.3052320  | C                                             | 1.6418780  | -3.2657000 | -0.7432300 |
| H   | 4.9559700  | -3.9676450 | 1.2131120  | C                                             | 4.3798610  | -2.9411500 | -0.3678460 |
| H   | 4.0391060  | -4.0850030 | 3.5166970  | H                                             | 4.2250490  | -1.3108860 | -1.7628230 |
| C   | -1.5135270 | -2.8454520 | -2.4622320 | C                                             | 2.3285760  | -4.1040310 | 0.1248210  |
| C   | -1.0036400 | -1.7464800 | -3.0180210 | H                                             | 0.5658060  | -3.3719320 | -0.8494860 |
| H   | -2.2393440 | -3.4316020 | -3.0247550 | C                                             | 3.7020470  | -3.9481160 | 0.3151530  |
| H   | -1.2833890 | -1.4430010 | -4.0213980 | H                                             | 5.4459600  | -2.7997070 | -0.2176880 |
| H   | -0.3477100 | -1.0675170 | -2.4789820 | H                                             | 1.7846450  | -4.8732850 | 0.6656530  |
| H   | 0.0998280  | -0.3752070 | 1.1806130  | H                                             | 4.2384050  | -4.6029020 | 0.9958480  |
| TS2 |            |            |            | L <sub>2</sub> PdCl( <i>iso</i> -phenylethyl) |            |            |            |
| C   | -4.7087770 | 3.5929250  | 0.9216560  | C                                             | 2.1808690  | 3.6317920  | -0.7385150 |
| C   | -4.5685980 | 3.8012100  | -0.4459350 | C                                             | 1.9374480  | 4.1817310  | 0.5117410  |
| C   | -3.3468700 | 3.5344330  | -1.0621640 | C                                             | 0.6439010  | 4.1480200  | 1.0487820  |
| C   | -2.2733670 | 3.0658610  | -0.3183330 | C                                             | -0.3888970 | 3.5582070  | 0.3442120  |
| C   | -2.3977160 | 2.8766440  | 1.0621250  | C                                             | -0.1689210 | 3.0055490  | -0.9391300 |
| C   | -3.6283050 | 3.1327190  | 1.6698950  | C                                             | 1.1390070  | 3.0562600  | -1.4713410 |
| C   | -1.2591940 | 2.4303580  | 1.9077770  | C                                             | -1.2342350 | 2.2653200  | -1.6388760 |
| C   | 0.0823980  | 2.6730590  | 1.6159850  | C                                             | -1.4503060 | 2.4753610  | -3.1202880 |
| Pd  | -0.0788850 | 0.5203930  | 1.0515220  | Pd                                            | -0.0619280 | 0.6039740  | -1.0639870 |
| Cl  | 0.7947120  | 0.0136200  | 3.6258220  | Cl                                            | 0.6814890  | -0.0161320 | -3.4705930 |
| P   | 1.9954570  | 0.5176100  | -0.1116290 | P                                             | -1.9384550 | -0.2094120 | 0.0279720  |
| C   | 3.1404840  | 1.8876520  | 0.3032720  | C                                             | -3.2959000 | -0.6281550 | -1.1246750 |
| C   | 3.8536500  | 2.6302260  | -0.6398610 | C                                             | -4.5716010 | -0.9736220 | -0.6609370 |
| C   | 4.7521040  | 3.6094040  | -0.2220900 | C                                             | -5.5648540 | -1.3437930 | -1.5590100 |
| C   | 4.9540330  | 3.8402730  | 1.1352540  | C                                             | -5.2864250 | -1.3918010 | -2.9251150 |
| C   | 4.2591370  | 3.0864160  | 2.0790260  | C                                             | -4.0134580 | -1.0761720 | -3.3878130 |
| C   | 3.3539080  | 2.1138520  | 1.6692520  | C                                             | -3.0160210 | -0.6941230 | -2.4918030 |
| C   | 1.6601200  | 0.6572420  | -1.9058230 | C                                             | -2.6276600 | 0.9697540  | 1.2390200  |
| C   | 1.6494800  | -0.4560920 | -2.7511140 | C                                             | -1.8801720 | 1.2238710  | 2.3965530  |
| C   | 1.2153880  | -0.3346380 | -4.0701250 | C                                             | -2.2714300 | 2.2173350  | 3.2847810  |
| C   | 0.7849240  | 0.8937290  | -4.5605190 | C                                             | -3.4016700 | 2.9892010  | 3.0179010  |
| C   | 0.7790400  | 2.0073350  | -3.7204920 | C                                             | -4.1401540 | 2.7543910  | 1.8620530  |
| C   | 1.2049850  | 1.8870740  | -2.4031770 | C                                             | -3.7581710 | 1.7479830  | 0.9766780  |
| P   | -1.3017430 | -1.2093620 | 0.0681320  | P                                             | 1.7754440  | -0.5220450 | 0.0472860  |
| C   | -2.2594850 | -2.2486130 | 1.2230520  | C                                             | 3.4006960  | 0.2640770  | -0.2991820 |
| C   | -2.0782000 | -2.0844980 | 2.5982510  | C                                             | 3.6631420  | 0.6424800  | -1.6200640 |
| C   | -2.7828650 | -2.8952960 | 3.4880900  | C                                             | 4.8913430  | 1.2063700  | -1.9528280 |
| C   | -3.6635920 | -3.8598400 | 3.0120050  | C                                             | 5.8619540  | 1.4044290  | -0.9739230 |

|   |            |            |            |   |            |            |            |
|---|------------|------------|------------|---|------------|------------|------------|
| C | -3.8366660 | -4.0331430 | 1.6378040  | C | 5.6080550  | 1.0191990  | 0.3399960  |
| C | -3.1308290 | -3.2368550 | 0.7458770  | C | 4.3864340  | 0.4426250  | 0.6756110  |
| C | -0.4235050 | -2.4629570 | -0.9421230 | C | 2.1498710  | -2.2908270 | -0.2384710 |
| C | -0.7495320 | -2.8004600 | -2.2572420 | C | 2.8808490  | -3.0705470 | 0.6629050  |
| C | 0.0218260  | -3.7297050 | -2.9518120 | C | 3.1379760  | -4.4085250 | 0.3830580  |
| C | 1.1215330  | -4.3275800 | -2.3414970 | C | 2.6875360  | -4.9708530 | -0.8100550 |
| C | 1.4325720  | -4.0183380 | -1.0185450 | C | 1.9942230  | -4.1872560 | -1.7288000 |
| C | 0.6568240  | -3.0987080 | -0.3230870 | C | 1.7255060  | -2.8500400 | -1.4476950 |
| H | -5.6585150 | 3.7885310  | 1.4106080  | H | 3.1832120  | 3.6389090  | -1.1549470 |
| H | -5.4090280 | 4.1586460  | -1.0336170 | H | 2.7486480  | 4.6369930  | 1.0727540  |
| H | -3.2364010 | 3.6706080  | -2.1332170 | H | 0.4493470  | 4.5793180  | 2.0267740  |
| H | -1.3409930 | 2.8135080  | -0.8166130 | H | -1.3889250 | 3.5272670  | 0.7668110  |
| H | -3.7393770 | 2.9758090  | 2.7399150  | H | 1.3323980  | 2.6528060  | -2.4610300 |
| H | -1.5011540 | 0.7048860  | 1.7453620  | H | -2.1792390 | 2.3216710  | -1.0953040 |
| H | 0.3621020  | 3.2293100  | 0.7250590  | H | -1.8826760 | 3.4743960  | -3.2764350 |
| H | 0.8032290  | 2.6343440  | 2.4239890  | H | -2.1566890 | 1.7397570  | -3.5130410 |
| H | 3.7143860  | 2.4496420  | -1.7015670 | H | -0.5320130 | 2.3879500  | -3.7012040 |
| H | 5.2991360  | 4.1876800  | -0.9610890 | H | -4.7858480 | -0.9544780 | 0.4046790  |
| H | 5.6568440  | 4.6027970  | 1.4579260  | H | -6.5543560 | -1.6027610 | -1.1938810 |
| H | 4.4190030  | 3.2549840  | 3.1395450  | H | -6.0624540 | -1.6852890 | -3.6260440 |
| H | 2.8137790  | 1.5225590  | 2.4095040  | H | -3.7872600 | -1.1275900 | -4.4484160 |
| H | 1.9568100  | -1.4295310 | -2.3821610 | H | -2.0153200 | -0.4641170 | -2.8545390 |
| H | 1.2046790  | -1.2142470 | -4.7066660 | H | -0.9800070 | 0.6521910  | 2.5982240  |
| H | 0.4480800  | 0.9848600  | -5.5888980 | H | -1.6805240 | 2.3955600  | 4.1783160  |
| H | 0.4351930  | 2.9688880  | -4.0900360 | H | -3.7027120 | 3.7725720  | 3.7070450  |
| H | 1.1817300  | 2.7577560  | -1.7525540 | H | -5.0183130 | 3.3547390  | 1.6438810  |
| H | -1.3680430 | -1.3489760 | 2.9758780  | H | -4.3406010 | 1.5767390  | 0.0765550  |
| H | -2.6317320 | -2.7677620 | 4.5554560  | H | 2.9018190  | 0.4975270  | -2.3846780 |
| H | -4.2134440 | -4.4864910 | 3.7084320  | H | 5.0848860  | 1.4937490  | -2.9821150 |
| H | -4.5181600 | -4.7920450 | 1.2648970  | H | 6.8162220  | 1.8538520  | -1.2335290 |
| H | -3.2577840 | -3.3791610 | -0.3244480 | H | 6.3638310  | 1.1627110  | 1.1069390  |
| H | -1.5933160 | -2.3306340 | -2.7514500 | H | 4.2016970  | 0.1457410  | 1.7035760  |
| H | -0.2349370 | -3.9795800 | -3.9773750 | H | 3.2469040  | -2.6365240 | 1.5890870  |
| H | 1.7310890  | -5.0371290 | -2.8933400 | H | 3.6974940  | -5.0108710 | 1.0927860  |
| H | 2.2884940  | -4.4730000 | -0.5293890 | H | 2.8892010  | -6.0159740 | -1.0270960 |
| H | 0.9017940  | -2.8586080 | 0.7063810  | H | 1.6600180  | -4.6138650 | -2.6697770 |
| C | 3.1100040  | -0.9140440 | 0.1222640  | H | 1.1963330  | -2.2296510 | -2.1698760 |
| C | 3.0337640  | -1.5974900 | 1.3394490  | C | -1.7569140 | -1.7862550 | 0.9449370  |
| C | 4.0854000  | -1.2718650 | -0.8137210 | C | -1.1123190 | -2.8232790 | 0.2645490  |
| C | 3.9032230  | -2.6551450 | 1.5956260  | C | -2.2239530 | -2.0088640 | 2.2415480  |



|                                             |            |            |            |                                            |            |            |            |
|---------------------------------------------|------------|------------|------------|--------------------------------------------|------------|------------|------------|
| H                                           | 2.3020220  | -1.2957170 | 2.0903490  | C                                          | -0.8969000 | -4.0506220 | 0.8798310  |
| C                                           | 4.9395350  | -2.3391940 | -0.5588210 | H                                          | -0.7603950 | -2.6619090 | -0.7494150 |
| H                                           | 4.1810510  | -0.7217330 | -1.7454570 | C                                          | -2.0174090 | -3.2420170 | 2.8553970  |
| C                                           | 4.8457100  | -3.0362980 | 0.6446270  | H                                          | -2.7358650 | -1.2202020 | 2.7833330  |
| H                                           | 3.8385380  | -3.1777820 | 2.5451120  | C                                          | -1.3448310 | -4.2594450 | 2.1830030  |
| H                                           | 5.6859020  | -2.6202260 | -1.2959000 | H                                          | -0.3639840 | -4.8306660 | 0.3443650  |
| H                                           | 5.5191320  | -3.8647800 | 0.8454590  | H                                          | -2.3805950 | -3.4043120 | 3.8661940  |
| C                                           | -2.5236510 | -0.4571510 | -1.0689910 | H                                          | -1.1748800 | -5.2146240 | 2.6710380  |
| C                                           | -3.8806230 | -0.3618580 | -0.7556650 | C                                          | 1.5583200  | -0.3148820 | 1.8558290  |
| C                                           | -2.0541620 | 0.1295430  | -2.2507580 | C                                          | 1.7312450  | 0.9706640  | 2.3893240  |
| C                                           | -4.7569100 | 0.2805800  | -1.6275380 | C                                          | 1.0683660  | -1.3271230 | 2.6852910  |
| H                                           | -4.2585020 | -0.7882850 | 0.1682700  | C                                          | 1.4566970  | 1.2256590  | 3.7273190  |
| C                                           | -2.9338600 | 0.7483750  | -3.1291930 | H                                          | 2.0738620  | 1.7797230  | 1.7505830  |
| H                                           | -0.9965670 | 0.0941970  | -2.4904790 | C                                          | 0.7833060  | -1.0659590 | 4.0244450  |
| C                                           | -4.2904410 | 0.8220850  | -2.8208390 | H                                          | 0.8914020  | -2.3222150 | 2.2899380  |
| H                                           | -5.8088700 | 0.3567060  | -1.3700630 | C                                          | 0.9834850  | 0.2054320  | 4.5525260  |
| H                                           | -2.5507890 | 1.1831680  | -4.0480370 | H                                          | 1.6034170  | 2.2265640  | 4.1228770  |
| H                                           | -4.9793390 | 1.3146020  | -3.5009200 | H                                          | 0.3955030  | -1.8649100 | 4.6493040  |
| H                                           | -1.4905000 | 2.2315060  | 2.9536520  | H                                          | 0.7668120  | 0.4032300  | 5.5982670  |
| L <sub>2</sub> PdCl( <i>n</i> -phenylethyl) |            |            |            | [L <sub>2</sub> PdH(styrene)] <sup>+</sup> |            |            |            |
| C                                           | 1.2033530  | -5.8136310 | 0.2323710  | Pd                                         | -0.1526580 | 0.1032910  | 0.3655970  |
| C                                           | -0.0002000 | -6.4859560 | 0.4329310  | P                                          | 2.1344140  | 0.6548140  | 0.0114890  |
| C                                           | -1.2036230 | -5.8133860 | 0.2323690  | C                                          | 3.3211660  | 0.1341850  | 1.2968590  |
| C                                           | -1.2011260 | -4.4794440 | -0.1648070 | C                                          | 4.3437460  | -0.7793440 | 1.0325860  |
| C                                           | 0.0000760  | -3.7979980 | -0.3691350 | C                                          | 5.1921060  | -1.1935380 | 2.0576030  |
| C                                           | 1.2011370  | -4.4796810 | -0.1648060 | C                                          | 5.0300990  | -0.6962230 | 3.3470200  |
| C                                           | 0.0001760  | -2.3293400 | -0.7245090 | C                                          | 4.0179650  | 0.2248830  | 3.6149800  |
| C                                           | 0.0000690  | -1.4750950 | 0.5466820  | C                                          | 3.1655960  | 0.6347610  | 2.5964380  |
| Pd                                          | 0.0000250  | 0.5196340  | 0.0353070  | C                                          | 2.4255610  | 2.4529860  | -0.1853570 |
| Cl                                          | 0.0001580  | 2.8378740  | -0.8220050 | C                                          | 1.5696180  | 3.1964410  | -1.0074350 |
| P                                           | 2.3698030  | 0.5669280  | 0.0675130  | C                                          | 1.8025430  | 4.5483130  | -1.2303090 |
| C                                           | 3.0564960  | 1.1836440  | -1.5097220 | C                                          | 2.8906810  | 5.1780270  | -0.6292540 |
| C                                           | 4.2984880  | 1.8184380  | -1.5817180 | C                                          | 3.7500370  | 4.4459080  | 0.1831120  |
| C                                           | 4.8146730  | 2.2075780  | -2.8136310 | C                                          | 3.5244110  | 3.0887850  | 0.4013010  |
| C                                           | 4.0976370  | 1.9598380  | -3.9814560 | P                                          | -2.4709230 | 0.2565650  | -0.0044790 |
| C                                           | 2.8574390  | 1.3306490  | -3.9151590 | C                                          | -3.4845710 | -0.7784900 | 1.1042460  |
| C                                           | 2.3350020  | 0.9509540  | -2.6834530 | C                                          | -3.5829580 | -0.4215530 | 2.4557540  |
| C                                           | 3.2877320  | -1.0047180 | 0.3165250  | C                                          | -4.2426400 | -1.2538040 | 3.3524580  |
| C                                           | 3.2828860  | -1.6092180 | 1.5809710  | C                                          | -4.8024200 | -2.4522020 | 2.9110760  |

|   |            |            |            |   |            |            |            |
|---|------------|------------|------------|---|------------|------------|------------|
| C | 3.9477110  | -2.8105220 | 1.7953350  | C | -4.7065780 | -2.8116720 | 1.5703540  |
| C | 4.6268170  | -3.4295800 | 0.7475580  | C | -4.0489010 | -1.9796210 | 0.6666030  |
| C | 4.6289570  | -2.8433380 | -0.5139110 | C | -2.9303840 | -0.2673180 | -1.6874700 |
| C | 3.9608660  | -1.6391290 | -0.7307280 | C | -4.1894520 | 0.0164160  | -2.2281520 |
| P | -2.3697920 | 0.5668960  | 0.0675080  | C | -4.5260320 | -0.4519240 | -3.4929360 |
| C | -3.0566570 | 1.1838400  | -1.5095650 | C | -3.6137510 | -1.2112910 | -4.2239130 |
| C | -2.3350730 | 0.9518600  | -2.6833730 | C | -2.3596350 | -1.4959700 | -3.6920360 |
| C | -2.8576560 | 1.3318070  | -3.9149470 | C | -2.0166670 | -1.0224800 | -2.4289950 |
| C | -4.0980940 | 1.9605340  | -3.9810250 | H | 4.4756940  | -1.1772500 | 0.0316340  |
| C | -4.8152390 | 2.2075620  | -2.8131090 | H | 5.9838690  | -1.9047490 | 1.8437620  |
| C | -4.2989050 | 1.8181800  | -1.5813420 | H | 5.6943090  | -1.0198320 | 4.1420510  |
| C | -3.0703510 | 1.6566090  | 1.3666460  | H | 3.8937730  | 0.6248110  | 4.6163390  |
| C | -4.3449390 | 1.4431750  | 1.9073230  | H | 2.3816420  | 1.3583080  | 2.8102420  |
| C | -4.8544200 | 2.3087840  | 2.8704120  | H | 0.7232710  | 2.7166210  | -1.4905840 |
| C | -4.0991640 | 3.3963200  | 3.3018590  | H | 1.1339430  | 5.1106230  | -1.8746270 |
| C | -2.8346150 | 3.6166200  | 2.7643950  | H | 3.0694120  | 6.2351140  | -0.7985630 |
| C | -2.3187950 | 2.7524330  | 1.8032570  | H | 4.6051170  | 4.9272670  | 0.6469860  |
| H | 2.1484740  | -6.3282870 | 0.3842870  | H | 4.2120850  | 2.5291660  | 1.0263340  |
| H | -0.0003070 | -7.5278350 | 0.7409100  | H | -3.1551940 | 0.5155220  | 2.8043040  |
| H | -2.1488460 | -6.3278550 | 0.3842820  | H | -4.3231940 | -0.9673250 | 4.3962880  |
| H | -2.1411460 | -3.9563180 | -0.3177600 | H | -5.3163900 | -3.1016980 | 3.6123730  |
| H | 2.1412660  | -3.9567450 | -0.3177460 | H | -5.1482880 | -3.7397500 | 1.2217170  |
| H | -0.8832580 | -2.0978480 | -1.3336710 | H | -3.9825570 | -2.2659520 | -0.3787890 |
| H | -0.8768880 | -1.7156220 | 1.1505800  | H | -4.9052510 | 0.6110470  | -1.6689650 |
| H | 0.8769360  | -1.7155770 | 1.1507320  | H | -5.5011330 | -0.2231550 | -3.9107790 |
| H | 4.8603660  | 2.0203790  | -0.6747360 | H | -3.8801990 | -1.5755310 | -5.2111470 |
| H | 5.7772050  | 2.7079700  | -2.8607110 | H | -1.6435560 | -2.0789170 | -4.2626490 |
| H | 4.5018890  | 2.2659860  | -4.9418350 | H | -1.0304670 | -1.2290020 | -2.0213380 |
| H | 2.2885910  | 1.1492470  | -4.8219360 | C | 2.7605290  | -0.0798590 | -1.5329420 |
| H | 1.3537760  | 0.4888470  | -2.6255090 | C | 2.2146310  | -1.2832820 | -1.9867940 |
| H | 2.7688880  | -1.1270900 | 2.4086680  | C | 3.8112090  | 0.5147710  | -2.2396620 |
| H | 3.9322580  | -3.2658550 | 2.7805710  | C | 2.7194630  | -1.8911680 | -3.1319870 |
| H | 5.1451710  | -4.3691350 | 0.9138350  | H | 1.4006390  | -1.7527430 | -1.4420200 |
| H | 5.1510900  | -3.3209830 | -1.3375200 | C | 4.3079940  | -0.0925600 | -3.3877150 |
| H | 3.9779270  | -1.1883280 | -1.7177160 | H | 4.2391430  | 1.4522750  | -1.8967960 |
| H | -1.3536640 | 0.4901290  | -2.6256010 | C | 3.7639500  | -1.2955780 | -3.8338830 |
| H | -2.2887270 | 1.1509640  | -4.8217840 | H | 2.2929740  | -2.8295480 | -3.4727820 |
| H | -4.5024560 | 2.2668850  | -4.9412930 | H | 5.1208140  | 0.3742320  | -3.9348780 |
| H | -5.7779620 | 2.7076040  | -2.8600120 | H | 4.1547130  | -1.7665310 | -4.7305390 |
| H | -4.8608620 | 2.0195740  | -0.6742870 | C | -3.0952120 | 1.9491300  | 0.2494860  |

|      |            |            |            |      |            |            |            |
|------|------------|------------|------------|------|------------|------------|------------|
| H    | -4.9414100 | 0.5960060  | 1.5824570  | C    | -4.4500910 | 2.1851940  | 0.5178120  |
| H    | -5.8425210 | 2.1312930  | 3.2845890  | C    | -2.2149090 | 3.0325210  | 0.1616010  |
| H    | -4.4969810 | 4.0709950  | 4.0544120  | C    | -4.9163540 | 3.4861330  | 0.6694480  |
| H    | -2.2425180 | 4.4660560  | 3.0913800  | H    | -5.1405490 | 1.3534900  | 0.6262480  |
| H    | -1.3439020 | 2.9416200  | 1.3651100  | C    | -2.6857400 | 4.3328870  | 0.3162310  |
| C    | 3.0704410  | 1.6567490  | 1.3664980  | H    | -1.1573230 | 2.8619310  | -0.0143460 |
| C    | 2.3187540  | 2.7523540  | 1.8034240  | C    | -4.0356790 | 4.5610400  | 0.5651460  |
| C    | 4.3452240  | 1.4435430  | 1.9068110  | H    | -5.9677000 | 3.6605980  | 0.8745200  |
| C    | 2.8346370  | 3.6165620  | 2.7645100  | H    | -1.9920480 | 5.1651860  | 0.2504180  |
| H    | 1.3437060  | 2.9413640  | 1.3655530  | H    | -4.4024610 | 5.5751730  | 0.6887920  |
| C    | 4.8547730  | 2.3091730  | 2.8698430  | H    | -0.2359780 | 0.9603960  | -0.9266490 |
| H    | 4.9417890  | 0.5965310  | 1.5817060  | C    | 1.9520300  | -4.5857120 | -0.6353460 |
| C    | 4.0993830  | 3.3964950  | 3.3016040  | C    | 0.5931360  | -4.4053580 | -0.8856520 |
| H    | 2.2424330  | 4.4658250  | 3.0917490  | C    | -0.1487580 | -3.5397860 | -0.0892540 |
| H    | 5.8430230  | 2.1318650  | 3.2837390  | C    | 0.4606740  | -2.8372450 | 0.9593450  |
| H    | 4.4972510  | 4.0711840  | 4.0541170  | C    | 1.8220500  | -3.0413000 | 1.2149240  |
| C    | -3.2876750 | -1.0047960 | 0.3163920  | C    | 2.5617100  | -3.9065080 | 0.4186360  |
| C    | -3.9607790 | -1.6391360 | -0.7309240 | H    | 2.5341120  | -5.2624470 | -1.2529210 |
| C    | -3.2828160 | -1.6094180 | 1.5807810  | H    | 0.1105660  | -4.9433030 | -1.6957610 |
| C    | -4.6288450 | -2.8433810 | -0.5142180 | H    | -1.2098170 | -3.3958770 | -0.2802540 |
| H    | -3.9778360 | -1.1882550 | -1.7178760 | H    | 2.3031590  | -2.5333040 | 2.0446960  |
| C    | -3.9476290 | -2.8107490 | 1.7950380  | H    | 3.6167100  | -4.0561310 | 0.6252870  |
| H    | -2.7688250 | -1.1273610 | 2.4085220  | C    | -0.3619720 | -1.8925300 | 1.7352940  |
| C    | -4.6267170 | -3.4297270 | 0.7472020  | C    | 0.0843600  | -0.8946160 | 2.5440000  |
| H    | -5.1509470 | -3.3209720 | -1.3378770 | H    | -1.4334990 | -2.0727870 | 1.6922900  |
| H    | -3.9321690 | -3.2661690 | 2.7802330  | H    | -0.6236570 | -0.3363110 | 3.1500940  |
| H    | -5.1450580 | -4.3693040 | 0.9133930  | H    | 1.1378280  | -0.7503900 | 2.7580610  |
| H    | 0.8837660  | -2.0979290 | -1.3334730 |      |            |            |            |
| TS1' |            |            |            | TS2' |            |            |            |
| C    | 0.8852810  | -2.1471290 | -2.6800450 | C    | -3.4780570 | 3.7499730  | 0.0108750  |
| C    | 1.9753950  | -1.5999970 | -2.0081250 | C    | -2.8297820 | 4.7950700  | 0.6671460  |
| Pd   | 0.0822510  | -0.9231650 | -0.9095800 | C    | -1.5090910 | 5.0967790  | 0.3487160  |
| P    | 1.2844200  | 0.9761120  | 0.0279280  | C    | -0.8314180 | 4.3492890  | -0.6114480 |
| C    | 1.5734910  | 2.2479600  | -1.2505060 | C    | -1.4696420 | 3.2877850  | -1.2598860 |
| C    | 2.0658100  | 3.5139610  | -0.9062980 | C    | -2.8047640 | 3.0059990  | -0.9488900 |
| C    | 2.2760780  | 4.4757970  | -1.8874490 | C    | -0.7490170 | 2.4656620  | -2.2789400 |
| C    | 1.9893450  | 4.1895660  | -3.2212370 | C    | 0.6419670  | 2.2703570  | -2.2573980 |
| C    | 1.4891770  | 2.9394080  | -3.5720890 | Pd   | -0.1042300 | 0.5201620  | -1.1835310 |
| C    | 1.2815940  | 1.9747400  | -2.5897910 | P    | 2.0120990  | 0.1569790  | -0.0996560 |

|   |            |            |            |   |            |            |            |
|---|------------|------------|------------|---|------------|------------|------------|
| C | 2.9183290  | 0.4764110  | 0.6696440  | C | 2.1429240  | 1.1737810  | 1.4093890  |
| C | 2.9549040  | -0.6126140 | 1.5506540  | C | 3.0076300  | 0.8480240  | 2.4600650  |
| C | 4.1485280  | -0.9986650 | 2.1456410  | C | 3.0706450  | 1.6578720  | 3.5904530  |
| C | 5.3271550  | -0.3216370 | 1.8388460  | C | 2.2787650  | 2.8007630  | 3.6800450  |
| C | 5.3060590  | 0.7334420  | 0.9330370  | C | 1.4205040  | 3.1350210  | 2.6352110  |
| C | 4.1052290  | 1.1385140  | 0.3529950  | C | 1.3529750  | 2.3235800  | 1.5083040  |
| P | -2.1045210 | -0.5997090 | -0.1110040 | C | 3.4194400  | 0.6399710  | -1.1606230 |
| C | -2.6585280 | 1.0810770  | -0.5485810 | C | 3.3568220  | 0.3210340  | -2.5229220 |
| C | -2.2128440 | 1.6165420  | -1.7623340 | C | 4.4160580  | 0.6307280  | -3.3688970 |
| C | -2.5731630 | 2.9051640  | -2.1387410 | C | 5.5421730  | 1.2764360  | -2.8625240 |
| C | -3.3936730 | 3.6660140  | -1.3077240 | C | 5.6075950  | 1.6032060  | -1.5110910 |
| C | -3.8559340 | 3.1313690  | -0.1076760 | C | 4.5533330  | 1.2830380  | -0.6593330 |
| C | -3.4869380 | 1.8447550  | 0.2761690  | P | -1.5820460 | -1.0226720 | -0.1681700 |
| C | -2.3349970 | -0.8061750 | 1.6826960  | C | -1.3574350 | -1.0772700 | 1.6395390  |
| C | -3.6143850 | -0.9849910 | 2.2254290  | C | -1.0475130 | 0.1180430  | 2.2968330  |
| C | -3.7757390 | -1.1103150 | 3.6002120  | C | -0.7892360 | 0.1245850  | 3.6629870  |
| C | -2.6647950 | -1.0693410 | 4.4418420  | C | -0.8511240 | -1.0661120 | 4.3844860  |
| C | -1.3906800 | -0.9108720 | 3.9063600  | C | -1.1840820 | -2.2553660 | 3.7394330  |
| C | -1.2270370 | -0.7863860 | 2.5307030  | C | -1.4349020 | -2.2653990 | 2.3699430  |
| H | 0.7091920  | -3.2181980 | -2.6419660 | C | -1.4943060 | -2.7456850 | -0.7389660 |
| H | 2.3991390  | -0.6724580 | -2.3879790 | C | -2.6033540 | -3.5967400 | -0.6605430 |
| H | 2.2732570  | 3.7505170  | 0.1333900  | C | -2.4803640 | -4.9322810 | -1.0290000 |
| H | 2.6602800  | 5.4523600  | -1.6105180 | C | -1.2545730 | -5.4254530 | -1.4728740 |
| H | 2.1506770  | 4.9440800  | -3.9847540 | C | -0.1507180 | -4.5810420 | -1.5553980 |
| H | 1.2582390  | 2.7154780  | -4.6088870 | C | -0.2711310 | -3.2428830 | -1.1963090 |
| H | 0.8725120  | 1.0068660  | -2.8675220 | H | -4.5097900 | 3.5086360  | 0.2454670  |
| H | 2.0464890  | -1.1708920 | 1.7643000  | H | -3.3566000 | 5.3789840  | 1.4152770  |
| H | 4.1626760  | -1.8408790 | 2.8294120  | H | -1.0062770 | 5.9268170  | 0.8355930  |
| H | 6.2629710  | -0.6265300 | 2.2966040  | H | 0.1905550  | 4.6124110  | -0.8681750 |
| H | 6.2251610  | 1.2533390  | 0.6812360  | H | -3.3128280 | 2.1807330  | -1.4418230 |
| H | 4.1013360  | 1.9702330  | -0.3441310 | H | -1.2626870 | 2.3198710  | -3.2285120 |
| H | -1.5672330 | 1.0280410  | -2.4086550 | H | 1.1432280  | 1.9302630  | -3.1590030 |
| H | -2.2052390 | 3.3177950  | -3.0726630 | H | 1.2664880  | 2.8155300  | -1.5559420 |
| H | -3.6720540 | 4.6749930  | -1.5954830 | H | 3.6227720  | -0.0452900 | 2.4034450  |
| H | -4.4967560 | 3.7217980  | 0.5397620  | H | 3.7409890  | 1.3943100  | 4.4023830  |
| H | -3.8251710 | 1.4511930  | 1.2292270  | H | 2.3304810  | 3.4284240  | 4.5643440  |
| H | -4.4817400 | -1.0379470 | 1.5730770  | H | 0.7953840  | 4.0207400  | 2.6962750  |
| H | -4.7685110 | -1.2489720 | 4.0162350  | H | 0.6561200  | 2.5788220  | 0.7148010  |
| H | -2.7949830 | -1.1724590 | 5.5144750  | H | 2.4734480  | -0.1734360 | -2.9225050 |
| H | -0.5220950 | -0.8866070 | 4.5568460  | H | 4.3594870  | 0.3761880  | -4.4226070 |

|                                                            |            |            |            |                                                          |            |            |            |
|------------------------------------------------------------|------------|------------|------------|----------------------------------------------------------|------------|------------|------------|
| H                                                          | -0.2333820 | -0.6714250 | 2.1126550  | H                                                        | 6.3660220  | 1.5279290  | -3.5229250 |
| C                                                          | 0.5608570  | 1.9474210  | 1.4086570  | H                                                        | 6.4831370  | 2.1075350  | -1.1148110 |
| C                                                          | -0.4578230 | 2.8655100  | 1.1305970  | H                                                        | 4.6171640  | 1.5418090  | 0.3929370  |
| C                                                          | 0.9723630  | 1.7706280  | 2.7335240  | H                                                        | -0.9928910 | 1.0473320  | 1.7368900  |
| C                                                          | -1.0658290 | 3.5739160  | 2.1612190  | H                                                        | -0.5251180 | 1.0551390  | 4.1553560  |
| H                                                          | -0.7721800 | 3.0444480  | 0.1071500  | H                                                        | -0.6427970 | -1.0670510 | 5.4498650  |
| C                                                          | 0.3567700  | 2.4774430  | 3.7619200  | H                                                        | -1.2408210 | -3.1822590 | 4.3017940  |
| H                                                          | 1.7794270  | 1.0867140  | 2.9736780  | H                                                        | -1.6629370 | -3.2019940 | 1.8714980  |
| C                                                          | -0.6674730 | 3.3759580  | 3.4799120  | H                                                        | -3.5599740 | -3.2161740 | -0.3139230 |
| H                                                          | -1.8520630 | 4.2841330  | 1.9259730  | H                                                        | -3.3425470 | -5.5890490 | -0.9704800 |
| H                                                          | 0.6877850  | 2.3301560  | 4.7852310  | H                                                        | -1.1620340 | -6.4691450 | -1.7567290 |
| H                                                          | -1.1449550 | 3.9278530  | 4.2834890  | H                                                        | 0.8059110  | -4.9600270 | -1.9005470 |
| C                                                          | -3.3756540 | -1.7055860 | -0.8242890 | H                                                        | 0.5917470  | -2.5882270 | -1.2625690 |
| C                                                          | -4.5474890 | -1.2158930 | -1.4026130 | C                                                        | 2.4016070  | -1.5540960 | 0.4156000  |
| C                                                          | -3.1760240 | -3.0879100 | -0.7322470 | C                                                        | 1.8234970  | -2.0788670 | 1.5771300  |
| C                                                          | -5.5068820 | -2.1032850 | -1.8899040 | C                                                        | 3.1627830  | -2.3906890 | -0.4076500 |
| H                                                          | -4.7174780 | -0.1466920 | -1.4803820 | C                                                        | 1.9841660  | -3.4231520 | 1.8937140  |
| C                                                          | -4.1381480 | -3.9681110 | -1.2089470 | H                                                        | 1.2519170  | -1.4403470 | 2.2423170  |
| H                                                          | -2.2656740 | -3.4774390 | -0.2816300 | C                                                        | 3.3215420  | -3.7355030 | -0.0847120 |
| C                                                          | -5.3058200 | -3.4752190 | -1.7919270 | H                                                        | 3.6376880  | -1.9989090 | -1.3014540 |
| H                                                          | -6.4126990 | -1.7154990 | -2.3450620 | C                                                        | 2.7256100  | -4.2565170 | 1.0604650  |
| H                                                          | -3.9787790 | -5.0386220 | -1.1272700 | H                                                        | 1.5256490  | -3.8160230 | 2.7957260  |
| H                                                          | -6.0552330 | -4.1636410 | -2.1695080 | H                                                        | 3.9203470  | -4.3736450 | -0.7271840 |
| H                                                          | -0.6587420 | -2.1169300 | -1.6409180 | H                                                        | 2.8482790  | -5.3062750 | 1.3076100  |
| H                                                          | 0.4522080  | -1.6303830 | -3.5319770 | C                                                        | -3.3292270 | -0.5273660 | -0.4065030 |
| C                                                          | 2.8563550  | -2.4099960 | -1.1422710 | C                                                        | -4.1054580 | -0.0293400 | 0.6387940  |
| C                                                          | 4.2309230  | -2.1576880 | -1.1505330 | C                                                        | -3.8638220 | -0.5748230 | -1.7008070 |
| C                                                          | 2.3599640  | -3.4539220 | -0.3511950 | C                                                        | -5.3981110 | 0.4329460  | 0.3903780  |
| C                                                          | 5.0961750  | -2.9495180 | -0.4051910 | H                                                        | -3.7082480 | 0.0093190  | 1.6477550  |
| H                                                          | 4.6239750  | -1.3380150 | -1.7453920 | C                                                        | -5.1546090 | -0.1234600 | -1.9430100 |
| C                                                          | 3.2246010  | -4.2351620 | 0.4054110  | H                                                        | -3.2672470 | -0.9654280 | -2.5222210 |
| H                                                          | 1.2897240  | -3.6461360 | -0.3170030 | C                                                        | -5.9224120 | 0.3905660  | -0.8961510 |
| C                                                          | 4.5962370  | -3.9896150 | 0.3736630  | H                                                        | -5.9943430 | 0.8217450  | 1.2100860  |
| H                                                          | 6.1624050  | -2.7482010 | -0.4268590 | H                                                        | -5.5649030 | -0.1713750 | -2.9468320 |
| H                                                          | 2.8292920  | -5.0399880 | 1.0174000  | H                                                        | -6.9287580 | 0.7499110  | -1.0866780 |
| H                                                          | 5.2716240  | -4.6059540 | 0.9587180  | H                                                        | -1.4375530 | 0.8993920  | -1.9784530 |
| [L <sub>2</sub> Pd( <i>iso</i> -phenylethyl)] <sup>+</sup> |            |            |            | [L <sub>2</sub> Pd( <i>n</i> -phenylethyl)] <sup>+</sup> |            |            |            |
| C                                                          | -2.6847100 | 3.8036790  | 0.3149380  | C                                                        | 2.1468930  | -5.6668790 | 0.8729500  |
| C                                                          | -2.0969770 | 4.5733110  | -0.6867990 | C                                                        | 1.1547540  | -6.6254600 | 0.6774310  |

|    |            |            |            |    |            |            |            |
|----|------------|------------|------------|----|------------|------------|------------|
| C  | -0.7359150 | 4.4345670  | -0.9592040 | C  | -0.0385610 | -6.2674830 | 0.0557410  |
| C  | 0.0216790  | 3.5127620  | -0.2492670 | C  | -0.2384520 | -4.9555600 | -0.3657130 |
| C  | -0.5660840 | 2.7020200  | 0.7360960  | C  | 0.7511680  | -3.9901750 | -0.1759380 |
| C  | -1.9268360 | 2.8808740  | 1.0251530  | C  | 1.9446280  | -4.3575190 | 0.4507380  |
| C  | 0.2660040  | 1.7000260  | 1.4350030  | C  | 0.5265560  | -2.5479030 | -0.5772470 |
| C  | -0.1467740 | 1.2371560  | 2.8121460  | C  | 0.0897670  | -1.7620860 | 0.6531120  |
| Pd | 0.1842020  | -0.0182870 | 0.2371470  | Pd | -0.2254530 | 0.2016020  | 0.1926830  |
| P  | -2.1730740 | -0.5872880 | -0.0020390 | P  | 2.0764780  | 0.7245960  | 0.0383840  |
| C  | -2.8710940 | 0.0549420  | -1.5606520 | C  | 2.4769480  | 1.1003430  | -1.7004420 |
| C  | -3.9417680 | -0.5777440 | -2.2030150 | C  | 3.4858370  | 2.0058360  | -2.0441890 |
| C  | -4.4731370 | -0.0373170 | -3.3684440 | C  | 3.7689810  | 2.2578810  | -3.3826530 |
| C  | -3.9416510 | 1.1367390  | -3.9008370 | C  | 3.0510790  | 1.6080800  | -4.3847240 |
| C  | -2.8741690 | 1.7673420  | -3.2690680 | C  | 2.0446320  | 0.7058310  | -4.0493260 |
| C  | -2.3367170 | 1.2266720  | -2.1044720 | C  | 1.7551700  | 0.4552700  | -2.7115940 |
| C  | -3.4136600 | -0.2041240 | 1.2780630  | C  | 3.3007310  | -0.5039730 | 0.5909590  |
| C  | -3.2311990 | -0.7355670 | 2.5612660  | C  | 3.3041740  | -0.8753050 | 1.9422470  |
| C  | -4.1214230 | -0.4244170 | 3.5827140  | C  | 4.2061480  | -1.8262070 | 2.4046450  |
| C  | -5.1972460 | 0.4266690  | 3.3337170  | C  | 5.1052470  | -2.4213600 | 1.5201840  |
| C  | -5.3841930 | 0.9556840  | 2.0601120  | C  | 5.0979110  | -2.0644800 | 0.1750790  |
| C  | -4.4982920 | 0.6407670  | 1.0320050  | C  | 4.1988530  | -1.1076770 | -0.2921940 |
| P  | 2.5109590  | -0.0884030 | 0.0499280  | P  | -2.5389450 | 0.2368340  | 0.0876400  |
| C  | 3.2108150  | 0.8597010  | -1.3357390 | C  | -3.4174760 | -0.5116360 | -1.3073300 |
| C  | 2.3655190  | 1.6106600  | -2.1561770 | C  | -3.2500180 | -1.8845820 | -1.5220490 |
| C  | 2.8835190  | 2.3011170  | -3.2497040 | C  | -3.9131200 | -2.5106370 | -2.5715260 |
| C  | 4.2448100  | 2.2388220  | -3.5290350 | C  | -4.7387030 | -1.7678440 | -3.4134750 |
| C  | 5.0910400  | 1.4754130  | -2.7243990 | C  | -4.9068350 | -0.4012570 | -3.2035700 |
| C  | 4.5774070  | 0.7819060  | -1.6360920 | C  | -4.2496860 | 0.2301380  | -2.1514230 |
| C  | 2.9474810  | -1.8155280 | -0.3621520 | C  | -2.2983440 | 2.0111100  | -0.2823770 |
| C  | 3.7633040  | -2.6248250 | 0.4299000  | C  | -2.6195340 | 3.0163710  | 0.6387910  |
| C  | 4.0092310  | -3.9438240 | 0.0542500  | C  | -2.2305710 | 4.3294610  | 0.3977280  |
| C  | 3.4486310  | -4.4599640 | -1.1099280 | C  | -1.5065830 | 4.6526100  | -0.7508220 |
| C  | 2.6452460  | -3.6513130 | -1.9128170 | C  | -1.1751720 | 3.6600820  | -1.6683270 |
| C  | 2.3956310  | -2.3356400 | -1.5414540 | C  | -1.5647380 | 2.3423300  | -1.4377380 |
| H  | -3.7384950 | 3.9232840  | 0.5462730  | H  | 3.0818380  | -5.9406060 | 1.3528310  |
| H  | -2.6929470 | 5.2907790  | -1.2419500 | H  | 1.3126560  | -7.6484390 | 1.0045400  |
| H  | -0.2651980 | 5.0537630  | -1.7165870 | H  | -0.8130030 | -7.0116080 | -0.1041990 |
| H  | 1.0845070  | 3.4124600  | -0.4524620 | H  | -1.1694310 | -4.6829930 | -0.8591280 |
| H  | -2.3994250 | 2.2966730  | 1.8065520  | H  | 2.7208620  | -3.6111210 | 0.6008310  |
| H  | 1.3186140  | 1.9876970  | 1.4194130  | H  | -0.2335490 | -2.4866680 | -1.3646250 |
| H  | -0.1495350 | 2.1063060  | 3.4852350  | H  | -0.8390400 | -2.1531710 | 1.0748510  |

|   |            |            |            |   |            |            |            |
|---|------------|------------|------------|---|------------|------------|------------|
| H | 0.5693600  | 0.5147150  | 3.2109680  | H | 0.8621630  | -1.7567270 | 1.4266450  |
| H | -1.1463220 | 0.7963730  | 2.8375200  | H | 4.0436010  | 2.5211390  | -1.2676870 |
| H | -4.3578730 | -1.4948500 | -1.7961680 | H | 4.5501990  | 2.9644790  | -3.6440790 |
| H | -5.3027210 | -0.5327360 | -3.8629580 | H | 3.2742610  | 1.8072730  | -5.4281710 |
| H | -4.3604640 | 1.5565980  | -4.8101630 | H | 1.4842340  | 0.1985320  | -4.8283840 |
| H | -2.4560470 | 2.6815000  | -3.6789450 | H | 0.9653750  | -0.2456850 | -2.4507800 |
| H | -1.5052320 | 1.7239600  | -1.6141770 | H | 2.6106140  | -0.4073440 | 2.6373010  |
| H | -2.3965090 | -1.4045380 | 2.7592340  | H | 4.2074490  | -2.1032030 | 3.4539600  |
| H | -3.9768320 | -0.8470610 | 4.5719540  | H | 5.8099930  | -3.1638960 | 1.8808550  |
| H | -5.8910360 | 0.6729310  | 4.1312580  | H | 5.7950300  | -2.5275990 | -0.5157980 |
| H | -6.2250320 | 1.6130150  | 1.8615360  | H | 4.2054710  | -0.8313070 | -1.3420840 |
| H | -4.6489720 | 1.0608400  | 0.0424810  | H | -2.6045830 | -2.4638500 | -0.8664100 |
| H | 1.2996130  | 1.6458780  | -1.9469980 | H | -3.7819430 | -3.5753620 | -2.7358930 |
| H | 2.2220350  | 2.8826130  | -3.8840700 | H | -5.2508800 | -2.2555070 | -4.2368880 |
| H | 4.6491900  | 2.7756580  | -4.3813270 | H | -5.5507770 | 0.1759810  | -3.8592780 |
| H | 6.1505860  | 1.4146090  | -2.9511710 | H | -4.3811030 | 1.2965870  | -1.9921560 |
| H | 5.2361400  | 0.1736280  | -1.0218820 | H | -3.1748370 | 2.7703930  | 1.5389760  |
| H | 4.2172850  | -2.2323780 | 1.3339920  | H | -2.4966230 | 5.1054550  | 1.1085230  |
| H | 4.6470900  | -4.5665540 | 0.6734240  | H | -1.2048700 | 5.6796580  | -0.9300050 |
| H | 3.6447990  | -5.4880380 | -1.3973340 | H | -0.6131270 | 3.9043120  | -2.5638450 |
| H | 2.2196630  | -4.0425350 | -2.8318000 | H | -1.3230820 | 1.5774380  | -2.1723100 |
| H | 1.7843660  | -1.7038950 | -2.1836070 | C | 2.4543090  | 2.2477340  | 0.9650620  |
| C | -2.2361910 | -2.4084320 | -0.1561970 | C | 1.4513690  | 3.2188510  | 1.0671080  |
| C | -1.1052040 | -3.0629030 | -0.6555490 | C | 3.7085180  | 2.4888810  | 1.5343070  |
| C | -3.3616710 | -3.1627580 | 0.1911380  | C | 1.7024230  | 4.4195800  | 1.7206710  |
| C | -1.0950990 | -4.4438170 | -0.8135460 | H | 0.4706300  | 3.0464580  | 0.6289210  |
| H | -0.2134300 | -2.4986510 | -0.9240110 | C | 3.9532520  | 3.6902490  | 2.1937410  |
| C | -3.3519430 | -4.5456200 | 0.0312870  | H | 4.4915420  | 1.7391610  | 1.4698050  |
| H | -4.2427070 | -2.6741870 | 0.5971830  | C | 2.9535940  | 4.6552910  | 2.2863220  |
| C | -2.2218820 | -5.1868410 | -0.4707360 | H | 0.9186090  | 5.1671750  | 1.7915080  |
| H | -0.2042720 | -4.9341530 | -1.1939110 | H | 4.9270740  | 3.8707200  | 2.6376760  |
| H | -4.2295250 | -5.1236800 | 0.3034020  | H | 3.1488450  | 5.5905950  | 2.8013910  |
| H | -2.2181780 | -6.2658290 | -0.5894450 | C | -3.5928330 | 0.1067610  | 1.5515630  |
| C | 3.4187650  | 0.3720170  | 1.5575390  | C | -4.9869220 | 0.0446740  | 1.4535600  |
| C | 4.3132050  | 1.4442550  | 1.6031200  | C | -2.9779000 | 0.0951240  | 2.8085830  |
| C | 3.1128190  | -0.3190060 | 2.7393590  | C | -5.7574430 | -0.0164090 | 2.6095350  |
| C | 4.9102170  | 1.8044300  | 2.8096530  | H | -5.4679720 | 0.0362610  | 0.4798480  |
| H | 4.5482340  | 2.0019550  | 0.7023330  | C | -3.7547700 | 0.0414260  | 3.9613330  |
| C | 3.7196980  | 0.0364300  | 3.9374740  | H | -1.8930120 | 0.1266020  | 2.8805090  |
| H | 2.3985390  | -1.1392900 | 2.7200000  | C | -5.1429370 | -0.0150620 | 3.8604320  |

|   |           |            |           |   |            |            |            |
|---|-----------|------------|-----------|---|------------|------------|------------|
| C | 4.6200070 | 1.1004440  | 3.9734580 | H | -6.8387430 | -0.0686360 | 2.5335190  |
| H | 5.6061640 | 2.6368010  | 2.8352100 | H | -3.2770080 | 0.0326190  | 4.9355920  |
| H | 3.4854250 | -0.5109770 | 4.8449720 | H | -5.7484300 | -0.0649950 | 4.7599870  |
| H | 5.0904270 | 1.3813380  | 4.9102800 | H | 1.4553520  | -2.1337610 | -0.9851610 |



## 4. Characterization data

**4.1 General procedure:** Pd(OAc)<sub>2</sub> (0.01 mmol, 2.2 mg), PPh<sub>3</sub> (0.03 mmol, 7.8 mg), FeCl<sub>3</sub> (0.02 mmol, 3.2 mg), 1,4-dioxane (2 mL), **1** (1.0 mmol) and a stirring bar were added into a vial (5 mL) in glovebox. After sealed, the vial was brought out of the glovebox followed by addition of H<sub>2</sub>O (2 mmol, 36 μL) with syringe under nitrogen atmosphere. The vial was placed in an alloyed plate, which was then transferred into an autoclave (250 mL) under nitrogen atmosphere. At room temperature, the autoclave was flushed with CO gas for five times and pressurized with CO gas to 50 bar. The reaction was performed at 80 °C for 10 h. After the reaction finished, the autoclave was cooled to room temperature and the pressure was carefully released. Remove the solvent under vacuum and the residue was directly purified by flash chromatography on silica gel (petroleum ether: ethyl acetate = 10/1 - 3/1) to give the desired carboxylic acid **2** or carboxylic acid **3**. After sealed, the vial was brought out of the glovebox followed by addition of H<sub>2</sub>O with syringe under nitrogen atmosphere.

**Experimental procedure for 2 (2j, 2o):** Pd(OAc)<sub>2</sub> (0.01 mmol, 2.2 mg), PPh<sub>3</sub> (0.03 mmol, 7.8 mg), FeCl<sub>3</sub> (0.02 mmol, 3.2 mg), 1,4-dioxane (2 mL), **1** (1mmol, **1j, 1o**) and a stirring bar were added into a vial (5 mL) in glovebox. After sealed, the vial was brought out of the glovebox followed by addition of H<sub>2</sub>O (2 mmol, 36 μL) with syringe under nitrogen atmosphere. At room temperature, the autoclave pressurized with CO gas to 50 bar. The reaction was performed at 100 °C for 15 h. After the reaction finished, the autoclave was cooled to room temperature and the pressure was carefully released. Remove the solvent under vacuum, and the residue was directly purified by flash chromatography on silica gel (petroleum ether: ethyl acetate = 10/1-3/1) to give the product **2j** or **2o**.

**Experimental procedure for 2 (2l, 2t, 2u, 2x):** Pd(OAc)<sub>2</sub> (0.02 mmol, 4.4 mg), PPh<sub>3</sub> (0.06 mmol, 15.6 mg), FeCl<sub>3</sub> (0.04 mmol, 6.4 mg), 1,4-dioxane (2 mL), **1** (1 mmol, **1l, 1t, 1u, 1x**) and a stirring bar were added into a vial (5 mL) in glovebox. After sealed, the vial was brought out of the glovebox followed by addition of H<sub>2</sub>O (2 mmol, 36 μL) with syringe under nitrogen atmosphere. At room temperature, the autoclave pressurized with CO gas to 50 bar. The reaction was performed at 120 °C for 15 h. After the reaction finished, the autoclave was cooled to room temperature and the pressure was carefully released. Remove the solvent under vacuum, and the residue was directly purified by flash chromatography on silica gel (petroleum ether: ethyl acetate = 10/1-3/1) to give the product **2 (2l, 2t, 2u, 2x)**.

2-phenylpropionic acid, **2a**

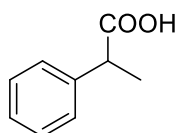

Colourless oil; 91% yield, *iso/n* > 99/1; <sup>1</sup>H NMR (400 MHz, CDCl<sub>3</sub>) 7.37-7.16 (m, 5H), 3.71 (q, *J* = 7.2 Hz, 1H), 1.49 (d, *J* = 7.2 Hz, 3H). <sup>13</sup>C NMR (100 MHz, CDCl<sub>3</sub>) δ 181.3, 139.8, 128.8, 127.7, 127.5, 45.5, 18.2. Data are in accordance with those reported in ref. [3, 4, 5, 6, 7].

2-(4-methylphenyl) propanoic acid, **2b**

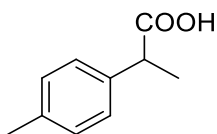

White solid; m.p. 31-32 °C; 90% yield, *iso/n* > 99/1; <sup>1</sup>H NMR (400 MHz, CDCl<sub>3</sub>) δ 11.61 (s, 1H), 7.19-7.15 (m, 4H), 3.70 (q, *J* = 7.0 Hz, 1H), 2.33 (s, 3H), 1.49 (d, *J* = 7.2 Hz, 3H). <sup>13</sup>C NMR (100 MHz, CDCl<sub>3</sub>) δ 181.5, 137.2, 136.9, 129.5, 127.6, 45.2, 21.1, 18.2. Data are in accordance with those reported in ref. [4, 5].

2-(4-methoxyphenyl) propanoic acid, **2c**

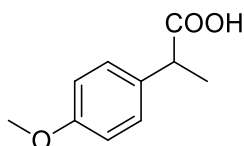

Yellow solid; m.p. 52-53 °C; 71% yield, *iso/n* = 99/1; <sup>1</sup>H NMR (400 MHz, CDCl<sub>3</sub>) δ 10.57 (s, br, 1H), 7.31 (d, *J* = 8.4 Hz, 2H), 6.94 (d, *J* = 8.4 Hz, 2H), 3.85 (s, 3H), 3.76 (d, *J* = 6.9 Hz, 1H), 1.56 (d, *J* = 7.1 Hz, 3H). <sup>13</sup>C NMR (100 MHz, CDCl<sub>3</sub>) δ 181.2, 158.9, 131.9, 128.7, 114.1, 55.3, 44.6, 18.2. Data are in accordance with those reported in ref. [4].

2-(4-(tert-butyl) phenyl) propanoic acid, **2d**

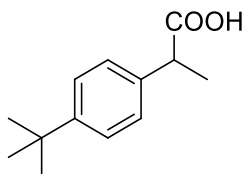

White solid, mp. 90-91 °C; 91% yield, *iso/n* > 99/1; <sup>1</sup>H NMR (400 MHz, CDCl<sub>3</sub>) δ 7.35-7.24 (m, 4H), 3.71 (q, *J* = 6.9 Hz, 1H), 1.49 (d, *J* = 7.1 Hz, 3H), 1.30 (s, 9H). <sup>13</sup>C NMR (100 MHz, CDCl<sub>3</sub>) δ 181.5, 150.3, 136.7, 127.4, 125.7, 45.0, 34.6, 31.4, 18.1. Data are in accordance with those reported in ref. [5].

2-(4-fluorophenyl) propionic acid, **2e**

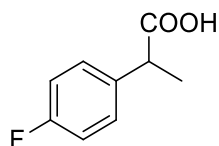

Colourless oil; 72% yield, *iso/n* > 99/1;  $^1\text{H NMR}$  (400 MHz,  $\text{CDCl}_3$ )  $\delta$  11.40 (s, 1H), 7.28-6.99 (m, 4H), 3.83-3.55 (m, 1H), 1.49 (d,  $J = 6.4$  Hz, 3H).  $^{13}\text{C NMR}$  (100 MHz,  $\text{CDCl}_3$ )  $\delta$  181.2, 162.2 (d,  $J = 246$  Hz), 135.5 (d,  $J = 3.0$  Hz), 129.3 (d,  $J = 8.1$  Hz), 115.5 (d,  $J = 21$  Hz), 44.8, 18.3. Data are in accordance with those reported in ref. [4].

2-(4-chlorophenyl) propionic acid, **2f**

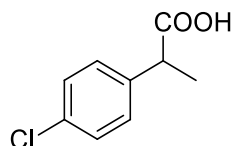

White solid, m.p. 47-49 °C; 86% yield, *iso/n* = 99/1;  $^1\text{H NMR}$  (400 MHz,  $\text{CDCl}_3$ )  $\delta$  7.28-7.22 (m, 4H), 3.74-3.64 (m, 1H), 1.47 (d,  $J = 6.8$  Hz, 3H).  $^{13}\text{C NMR}$  (100 MHz,  $\text{CDCl}_3$ )  $\delta$  180.6, 138.2, 133.4, 129.1, 128.9, 44.9, 18.2. Data are in accordance with those reported in ref. [5, 8].

2-(4-bromophenyl) propanoic acid, **2g**

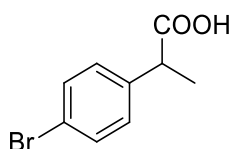

White solid; m.p. 66-67 °C; 85% yield, *iso/n* = 99/1;  $^1\text{H NMR}$  (400 MHz,  $\text{CDCl}_3$ )  $\delta$  7.45 (d,  $J = 7.5$  Hz, 2H), 7.19 (d,  $J = 7.5$  Hz, 2H), 3.70 (q,  $J = 6.9$  Hz, 1H), 1.49 (d,  $J = 6.9$  Hz, 3H).  $^{13}\text{C NMR}$  (100 MHz,  $\text{CDCl}_3$ )  $\delta$  180.4, 138.6, 131.8, 129.4, 121.4, 44.8, 18.0. Data are in accordance with those reported in ref. [9].

2-(4-cyanophenyl) propanoic acid, **2h**

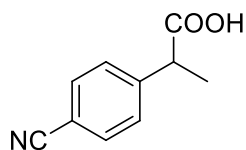

Yellow solid; m.p. 103-105 °C. 67% yield, *iso/n* = 99/1; <sup>1</sup>H NMR (400 MHz, CDCl<sub>3</sub>) δ 10.67 (s, br, 1H), 7.67 (d, *J* = 7.0 Hz, 2H), 7.46 (d, *J* = 13.0 Hz, 2H), δ 3.80 (q, *J* = 7.8, 10.7 Hz, 1H), 1.58 (d, *J* = 6.3 Hz, 3H). <sup>13</sup>C NMR (100 MHz, CDCl<sub>3</sub>) δ 179.6, 144.9, 132.6, 128.7, 118.7, 111.5, 45.5, 18.0. Data are in accordance with those reported in ref. [6, 7].

2-(4-(trifluoromethyl) phenyl) propanoic acid, **2i**

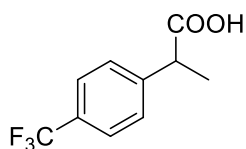

Colorless oil; 64% yield, *iso/n* = 100/0; <sup>1</sup>H NMR (400 MHz, CDCl<sub>3</sub>) δ 7.60 (d, *J* = 8.2 Hz, 2H), 7.44 (d, *J* = 8.1 Hz, 2H), 3.81 (q, *J* = 7.1 Hz, 1H), 1.54 (d, *J* = 7.2 Hz, 3H). <sup>13</sup>C NMR (100 MHz, CDCl<sub>3</sub>) δ 180.4, 143.6, 129.9 (q, *J* = 33 Hz), 128.2, 125.6 (q, *J* = 3.3 Hz), 122.7 (q, *J* = 270 Hz), 45.3, 18.0. Data are in accordance with those reported in ref. [6].

2-phenylpropanoic acid, **2j**

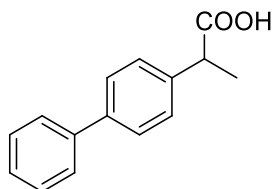

White solid; m.p. 134-136 °C; 70% yield, *iso/n* = 97/3; <sup>1</sup>H NMR (400 MHz, DMSO-*d*<sub>6</sub>) δ 12.41 (s, br, 1H), 7.65-7.60 (m, 4H), 7.50-7.32 (m, 5H), 3.73 (q, *J* = 6.9 Hz, 1H), 1.41 (d, *J* = 7.0 Hz, 3H). <sup>13</sup>C NMR (100 MHz, DMSO-*d*<sub>6</sub>) δ 175.4, 140.5, 140.0, 138.8, 128.9, 128.1, 127.4, 126.8, 126.6, 44.4, 18.5. Data are in accordance with those reported in ref. [4, 5].

2-(4-carboxyphenyl) propionic acid, **2k**

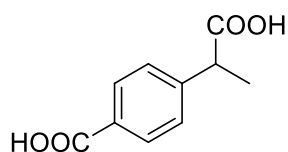

Yellow oil; 56% yield, *iso/n* = 97/3;  $^1\text{H NMR}$  (400 MHz,  $\text{DMSO-}d_6$ )  $\delta$  12.70 (s, 2H), 7.91 (d,  $J$  = 6.0 Hz, 2H), 7.40 (d,  $J$  = 5.9 Hz, 2H), 3.77 (d,  $J$  = 5.2 Hz, 1H), 1.37 (d,  $J$  = 4.5 Hz, 3H).  $^{13}\text{C NMR}$  (100 MHz,  $\text{DMSO-}d_6$ )  $\delta$  175.0, 167.3, 146.3, 129.7, 129.4, 127.8, 44.8, 18.4. Data are in accordance with those reported in ref. [10].

2-(4-isobutylphenyl) propionic acid, **2l**

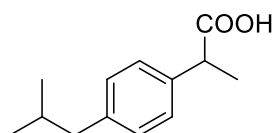

White solid; 77-78 °C; 92% yield, *iso/n* > 99/1;  $^1\text{H NMR}$  (400 MHz,  $\text{CDCl}_3$ )  $\delta$  7.28 (d,  $J$  = 7.2 Hz, 2H), 7.16 (d,  $J$  = 7.4 Hz, 2H), 3.76 (q,  $J$  = 6.7 Hz, 1H), 2.50 (d,  $J$  = 6.9 Hz, 2H), 1.95-1.85 (m, 1H), 1.55 (d,  $J$  = 6.8 Hz, 3H), 0.95 (d,  $J$  = 6.0 Hz, 6H).  $^{13}\text{C NMR}$  (100 MHz,  $\text{CDCl}_3$ )  $\delta$  181.2, 140.9, 136.9, 129.4, 127.3, 45.1, 44.9, 30.2, 22.4, 18.1. HRMS (ESI): Calcd. for  $\text{C}_{13}\text{H}_{17}\text{O}_2$   $[\text{M}]^+$ : 205.12340, Found: 205.1232.

2-(3-methylphenyl) propanoic acid, **2m**

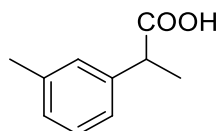

Yellow oil; 91% yield, *iso/n* > 99/1;  $^1\text{H NMR}$  (400 MHz,  $\text{CDCl}_3$ )  $\delta$  11.42 (s, br, 1H), 7.27-7.06 (m, 4H), 3.78-3.61 (m, 1H), 2.33 (s, 3H), 1.49 (d,  $J$  = 6.8 Hz, 3H).  $^{13}\text{C NMR}$  (100 MHz,  $\text{CDCl}_3$ )  $\delta$  181.3, 139.8, 138.4, 128.7, 128.4, 128.3, 124.7, 45.5, 21.5, 18.2. Data are in accordance with those reported in ref. [4, 5].

2-(3-methoxyphenyl) propanoic acid, **2n**

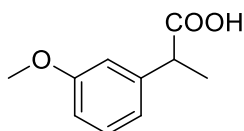

Yellow oil; 96% yield, *iso/n* = 99/1;  $^1\text{H NMR}$  (400 MHz,  $\text{CDCl}_3$ )  $\delta$  11.54 (s, br, 1H), 7.25 (t,  $J = 7.9$  Hz, 1H), 6.96-6.76 (m, 3H), 3.79 (s, 3H), 3.72 (q,  $J = 7.0$  Hz, 1H), 1.51 (d,  $J = 7.1$  Hz, 3H).  $^{13}\text{C NMR}$  (100 MHz,  $\text{CDCl}_3$ )  $\delta$  181.0, 159.8, 141.3, 129.7, 120.0, 113.5, 112.7, 55.2, 45.5, 18.1. Data are in accordance with those reported in ref. [4, 5, 6].

2-(2-methylphenyl) propanoic acid, **2p**

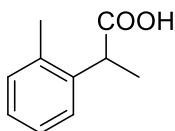

White solid; m.p. 75-76 °C; 94% yield, *iso/n* = 99/1;  $^1\text{H NMR}$  (400 MHz,  $\text{CDCl}_3$ )  $\delta$  11.70 (s, 1H), 7.30 (d,  $J = 6.9$  Hz, 1H), 7.26-7.15 (m, 3H), 3.98 (q,  $J = 7.0$  Hz, 1H), 2.38 (s, 3H), 1.49 (d,  $J = 7.1$  Hz, 3H).  $^{13}\text{C NMR}$  (100 MHz,  $\text{CDCl}_3$ )  $\delta$  181.52, 138.41, 136.03, 130.65, 127.32, 126.65, 126.5, 41.25, 19.75, 17.60. Data are in accordance with those reported in ref. [4, 5, 11].

2-(2-methoxyphenyl) propanoic acid, **2q**

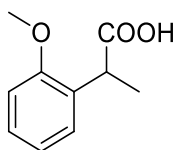

White solid; m.p. 94-96 °C; 96% yield, *iso/n* = 99/1;  $^1\text{H NMR}$  (400 MHz,  $\text{CDCl}_3$ )  $\delta$  11.66 (s, br, 1H), 7.24-7.40 (m, 2H), 6.99-7.76 (m, 2H), 4.09 (q,  $J = 7.1$  Hz, 1H), 3.80 (s, 3H), 1.49 (d,  $J = 7.2$  Hz, 3H). 4.07 (q,  $J = 7.1$  Hz, 1H), 3.77 (s, 3H), 1.46 (d,  $J = 7.2$  Hz, 3H).  $^{13}\text{C NMR}$  (100 MHz,  $\text{CDCl}_3$ )  $\delta$  181.6, 156.7, 128.8, 128.4, 128.0, 120.8, 110.7, 55.4, 39.2, 16.9. Data are in accordance with those reported in ref. [4, 5].

2-(2-fluorophenyl) propionic acid, **2r**

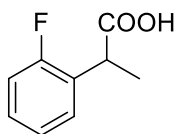

Colorless oil; 86% yield, *iso/n* = 99/1;  $^1\text{H NMR}$  (400 MHz,  $\text{CDCl}_3$ )  $\delta$  11.62 (s, br, 1H), 7.50-7.24 (m, 2H), 7.24-7.01 (m, 2H), 4.13 (q,  $J = 6.9$  Hz, 1H), 1.58 (d,  $J = 7.2$  Hz, 3H).  $^{13}\text{C NMR}$  (100 MHz,  $\text{CDCl}_3$ )  $\delta$  180.4, 161.7, 159.2, 128.9 (q,  $J = 8.3$  Hz), 127.2 (d,  $J = 15.1$  Hz), 124.4 ( $J = 3.8$  Hz), 115.6 (d,  $J = 23.0$  Hz), 38.54, 17.23. Data are in accordance with those reported in ref. [12].

2-(2-chlorophenyl) propionic acid, **2s**

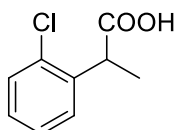

Colorless oil; 92% yield, *iso/n* = 93/7;  $^1\text{H NMR}$  (400 MHz,  $\text{CDCl}_3$ )  $\delta$  7.43-7.32 (m, 2H), 7.30-7.23 (m, 2H), 4.31 (q,  $J = 6.8$  Hz, 1H), 1.56 (d,  $J = 6.8$  Hz, 3H).  $^{13}\text{C NMR}$  (100 MHz,  $\text{CDCl}_3$ )  $\delta$  180.1, 137.7, 134.0, 129.8, 128.7, 128.6, 127.3, 42.1, 17.4. Data are in accordance with those reported in ref. [6, 12].

2-pyridyl propionic acid, **2t**

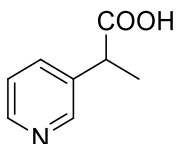

White solid; m.p. 84-85 °C; 73% yield, *iso/n* > 99/1;  $^1\text{H NMR}$  (400 MHz,  $\text{CDCl}_3$ )  $\delta$  9.64 (s, 1H), 8.59 (s, 1H), 8.48 (d,  $J = 4.1$  Hz, 1H), 7.83 (d,  $J = 7.5$  Hz, 1H), 7.41-7.28 (m, 1H), 3.78 (q,  $J = 6.8$  Hz, 1H), 1.55 (d,  $J = 6.8$  Hz, 3H).  $^{13}\text{C NMR}$  (100 MHz,  $\text{CDCl}_3$ )  $\delta$  176.5, 146.9, 145.7, 138.1, 137.3, 124.2, 43.5, 18.4. HRMS (ESI): calcd. for  $\text{C}_8\text{H}_8\text{NO}_2$  150.05550, Found: 150.0558.

Boxylic acid, **2u**

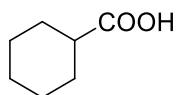

Colorless oil; 86% yield,  $^1\text{H}$  NMR (400 MHz,  $\text{CDCl}_3$ )  $\delta$  11.59 (s, 1H), 2.40-1.32 (m, 1H), 1.99-1.95 (m, 2H), 1.82-1.78 (m, 2H), 1.69-1.66 (m, 2H), 1.53-1.38 (m, 2H), 1.29-1.23 (m, 2H).  $^{13}\text{C}$  NMR (100 MHz,  $\text{CDCl}_3$ )  $\delta$  183.0, 42.9, 28.7, 25.7, 25.3. Data are in accordance with those reported in ref. [12].

3-phenylbutanoic acid, **2x**

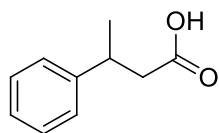

Colorless oil; 79% yield,  $^1\text{H}$  NMR (400 MHz,  $\text{CDCl}_3$ )  $\delta$  10.50 (s, 1H), 7.31 (t,  $J = 7.5$  Hz, 2H), 7.23 (d,  $J = 7.3$  Hz, 3H), 3.41-3.32 (m, 1H), 2.79-2.64 (m, 2H), 1.32 (d,  $J = 6.8$  Hz, 3H).  $^{13}\text{C}$  NMR (100 MHz,  $\text{CDCl}_3$ )  $\delta$  178.92, 145.50, 128.63, 126.77, 126.56, 42.69, 36.19, 21.92. Data are in accordance with those reported in ref. [13].



**4.2 General procedure:** Pd(OAc)<sub>2</sub> (0.01 mmol, 2.2 mg), PPh<sub>3</sub> (0.06 mmol, 15.6 mg), Fe(OTf)<sub>3</sub> (0.05 mmol, 26 mg), 1,4-dioxane (2 mL), **1** (1.0 mmol) and a stirring bar were added into a vial (5 mL) in glovebox. After sealed, the vial was brought out of the glovebox followed by addition of H<sub>2</sub>O (1 mmol, 18 μL) with syringe under nitrogen atmosphere. The vial was placed in an alloyed plate, which was then transferred into an autoclave (250 mL) under nitrogen atmosphere. At room temperature, the autoclave was flushed with CO gas for five times and pressurized with CO gas to 10 bar. The reaction was performed at 120 °C for 10 h. After the reaction finished, the autoclave was cooled to room temperature and the pressure was carefully released. The regioselectivity was measured by <sup>1</sup>H NMR analysis. Remove the solvent under vacuum and the residue was directly purified by flash chromatography on silica gel (petroleum ether: ethyl acetate = 10/1-3/1) to give the desired carboxylic acid **2** or carboxylic acid **3**.

**Experimental procedure for 3 (3u, 3x):** Pd(OTf)<sub>2</sub>(CH<sub>3</sub>CN)<sub>4</sub> (0.01 mmol, 2.2 mg), PPh<sub>3</sub> (0.06 mmol, 15.6 mg), FeCl<sub>3</sub> (0.02 mmol, 3.2 mg), 1,4-dioxane (2 mL), **1 (1u, 1x)**, 1.0 mmol) and a stirring bar were added into a vial (5 mL) in glovebox. After sealed, the vial was brought out of the glovebox followed by addition of H<sub>2</sub>O (1 mmol, 18 μL) with syringe under nitrogen atmosphere. The vial was placed in an alloyed plate, which was then transferred into an autoclave (250 mL) under nitrogen atmosphere. At room temperature, the autoclave was flushed with CO gas for five times and pressurized with CO gas to 10 bar. The reaction was performed at 120 °C for 10 h. After the reaction finished, the autoclave was cooled to room temperature and the pressure was carefully released. The regioselectivity was measured by <sup>1</sup>H NMR analysis. Remove the solvent under vacuum and the residue was directly purified by flash chromatography on silica gel (petroleum ether: ethyl acetate = 10/1-3/1) to give the desired carboxylic acid.

**Experimental procedure for 3z, 3aa, 3ab, 3ac:** Pd(OAc)<sub>2</sub> (0.01 mmol, 2.3 mg), PPh<sub>3</sub> (0.06 mmol, 15.6 mg), Fe(OTf)<sub>3</sub> (0.05 mmol, 25.6 mg), 1,4-dioxane (1 mL), **1 (1z, 1aa, 1ab, 1ac)** and a stirring bar were added into a vial (5 mL) in glovebox. After sealed, the vial was brought out of the glovebox followed by addition of H<sub>2</sub>O (3 mmol, 54 μL) with syringe under nitrogen atmosphere. The vial was placed in an alloyed plate, which was then transferred into an autoclave (250 mL) under nitrogen atmosphere. At room temperature, the autoclave was flushed with CO gas for five times and pressurized with CO gas to 50 bar. The reaction was performed at 120 °C for 15 h. After the reaction finished, the autoclave was cooled to room temperature and the pressure was carefully released. The regioselectivity was measured by GC analysis. Remove the solvent under vacuum and the residue was directly purified by flash chromatography on silica gel (petroleum ether: ethyl acetate = 50/1-10/1) to give the desired aliphatic carboxylic acid.

3-phenylpropionic acid, **3a**

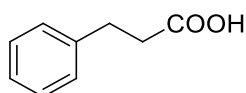

75% yield, *iso/n* = 15/85; <sup>1</sup>H NMR (400 MHz, CDCl<sub>3</sub>) δ 11.47 (s, br, 1H), 7.37-7.30 (m, 3H), 7.28-7.20 (m, 2H), 2.97 (t, *J* = 7.8 Hz, 2H), 2.69 (t, *J* = 7.8 Hz, 2H). <sup>13</sup>C NMR (100 MHz, CDCl<sub>3</sub>) δ 179.6, 140.2, 128.6, 128.3, 126.5, 35.7, 30.6. Data are in accordance with those reported in ref. [5, 14, 15].

3-(4-methylphenyl) propanoic acid, **3b**

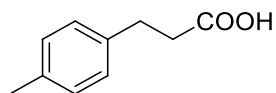

72% yield, *iso/n* = 16/84;  $^1\text{H NMR}$  (400 MHz,  $\text{CDCl}_3$ )  $\delta$  7.24-7.12 (m, 4H), 2.97 (t,  $J = 7.7$  Hz, 2H), 2.71 (t,  $J = 7.7$  Hz, 2H), 2.37 (s, 3H).  $^{13}\text{C NMR}$  (100 MHz,  $\text{CDCl}_3$ )  $\delta$  179.5, 137.2, 136.0, 129.4, 128.4, 35.9, 30.23, 21.1. Data are in accordance with those reported in ref. [5, 15].

3-(4-fluorophenyl) propionic acid, **3e**

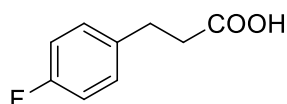

85% yield, *iso/n* = 17/83;  $^1\text{H NMR}$  (400 MHz,  $\text{CDCl}_3$ )  $\delta$  7.31-7.18 (m, 2H), 7.05-7.00 (m, 2H), 2.97 (t,  $J = 7.6$  Hz, 2H), 2.71 (t,  $J = 7.6$  Hz, 2H).  $^{13}\text{C NMR}$  (100 MHz,  $\text{CDCl}_3$ )  $\delta$  179.5, 161.6 (d,  $J = 242.8$  Hz), 135.8 (d,  $J = 3.3$  Hz), 129.8 (d,  $J = 7.9$  Hz), 115.4 (d,  $J = 21.1$  Hz), 35.9, 29.8. Data are in accordance with those reported in ref. [15].

3-(4-chlorophenyl) propionic acid, **3f**

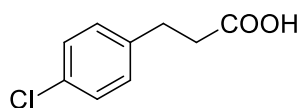

89% yield, *iso/n* = 11/89;  $^1\text{H NMR}$  (400 MHz,  $\text{CDCl}_3$ )  $\delta$  7.30 (d,  $J = 7.3$  Hz, 2H), 7.18 (d,  $J = 7.7$  Hz, 2H), 2.96 (t,  $J = 7.4$  Hz, 2H), 2.71 (t,  $J = 7.4$  Hz, 2H).  $^{13}\text{C NMR}$  (100 MHz,  $\text{CDCl}_3$ )  $\delta$  179.3, 138.6, 132.2, 129.8, 128.7, 35.6, 29.9. Data are in accordance with those reported in ref. [5, 16].

3-(4-bromophenyl) propanoic acid, **3g**

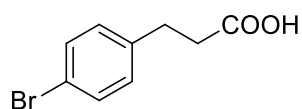

67% yield, *iso/n* = 23/77;  $^1\text{H NMR}$  (400 MHz,  $\text{CDCl}_3$ )  $\delta$  7.41 (d,  $J$  = 8.2 Hz, 2H), 7.09 (d,  $J$  = 8.1 Hz, 2H), 2.91 (t,  $J$  = 7.5 Hz, 2H), 2.67 (t,  $J$  = 7.5 Hz, 2H).  $^{13}\text{C NMR}$  (100 MHz,  $\text{CDCl}_3$ )  $\delta$  179.17, 139.16, 131.73, 130.18, 120.30, 35.47, 30.03. Data are in accordance with those reported in ref. [15].

3-(4-trifluoromethylphenyl) propanoic acid, **3i**

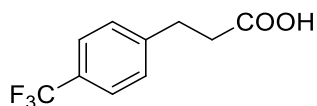

80% yield, *iso/n* = 15/85;  $^1\text{H NMR}$  (400 MHz,  $\text{CDCl}_3$ )  $\delta$  7.56 (d,  $J$  = 7.7 Hz, 2H), 7.33 (d,  $J$  = 7.7 Hz, 2H), 3.02 (t,  $J$  = 7.4 Hz, 2H), 2.72 (t,  $J$  = 7.4 Hz, 2H).  $^{13}\text{C NMR}$  (100 MHz,  $\text{CDCl}_3$ ) 179.0, 144.3, 129.1 (q,  $J$  = 30.3 Hz), 128.2, 125.6 (q,  $J$  = 3.8 Hz), 123.0 (q,  $J$  = 270 Hz), 35.2, 30.4. Data are in accordance with those reported in ref. [15].

3-(4-isobutylphenyl) propionic acid, **3l**

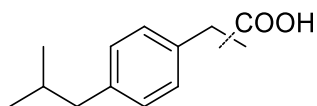

84% yield, *iso/n* = 31/69;  $^1\text{H NMR}$  (400 MHz,  $\text{CDCl}_3$ )  $\delta$  11.72 (s, br, 1H), 7.11-7.05 (m, 4H), 2.91 (t,  $J$  = 7.7 Hz, 2H), 2.66 (t,  $J$  = 7.6 Hz, 2H), 2.43 (d,  $J$  = 6.1 Hz, 2H), 1.88-1.78 (m, 1H), 0.89 (d,  $J$  = 6.4 Hz, 6H).  $^{13}\text{C NMR}$  (100 MHz,  $\text{CDCl}_3$ )  $\delta$  179.8, 139.8, 137.4, 129.3, 128.0, 45.1, 35.8, 30.3, 30.2, 22.4.

3-(3-methylphenyl) propanoic acid, **3m**

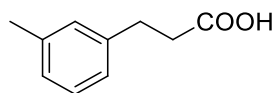

70% yield, *iso/n* = 19/81;  $^1\text{H NMR}$  (400 MHz,  $\text{CDCl}_3$ )  $\delta$  7.25-7.17 (m, 1H), 7.14-7.00 (m, 3H), 2.92 (t,  $J = 7.7$  Hz, 2H), 2.67 (t,  $J = 7.7$  Hz, 2H), 2.33 (s, 3H).  $^{13}\text{C NMR}$  (100 MHz,  $\text{CDCl}_3$ )  $\delta$  179.6, 140.2, 138.3, 129.2, 128.6, 127.2, 125.4, 35.8, 30.6, 21.5. Data are in accordance with those reported in ref. [5, 17].

3-(3-methoxyphenyl) propanoic acid, **3n**

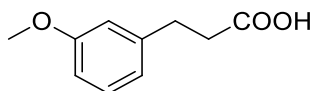

86% yield, *iso/n* = 19/81;  $^1\text{H NMR}$  (400 MHz,  $\text{CDCl}_3$ )  $\delta$  7.25-7.21 (m,  $J = 10.9$ , 1H), 6.90-6.78 (m, 3H), 3.80 (s, 3H), 2.94 (t,  $J = 7.0$  Hz, 2H), 2.69 (t,  $J = 7.0$  Hz, 2H).  $^{13}\text{C NMR}$  (100 MHz,  $\text{CDCl}_3$ )  $\delta$  179.2, 159.7, 141.9, 129.6, 120.7, 114.1, 111.7, 55.2, 35.6, 30.8. Data are in accordance with those reported in ref. [5, 14].

3-naphthalen-2-yl propanoic acid, **3o**

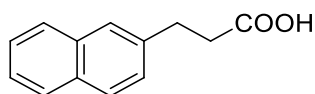

68% yield, *iso/n* = 16/84;  $^1\text{H NMR}$  (400 MHz,  $\text{CDCl}_3$ )  $\delta$  10.35 (s, br, 1H), 7.57-7.06 (m, 7H), 3.04 (t,  $J = 7.8$  Hz, 2H), 2.77 (t,  $J = 7.8$  Hz, 2H).  $^{13}\text{C NMR}$  (100 MHz,  $\text{CDCl}_3$ )  $\delta$  179.5, 140.2, 128.8, 128.6, 128.3, 127.7, 127.5, 126.4, 35.7, 30.6. Data are in accordance with those reported in ref. [14].

3-(2-methylphenyl) propanoic acid, **3p**

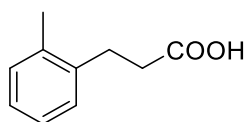

77% yield, *iso/n* = 6/94;  $^1\text{H NMR}$  (400 MHz,  $\text{CDCl}_3$ )  $\delta$  11.40 (s, br, 1H), 7.15 (s, 4H), 3.06-2.88 (m, 2H), 2.76-2.60 (m, 2H), 2.33 (s, 3H).  $^{13}\text{C NMR}$  (100 MHz,  $\text{CDCl}_3$ )  $\delta$  179.8, 138.3, 136.1, 130.5, 128.5, 126.6, 126.3, 34.5, 28.0, 19.4. Data are in accordance with those reported in ref. [5, 15, 18].

3-(2-methoxyphenyl) propanoic acid, **3q**

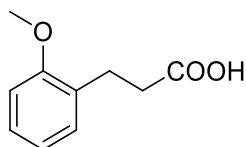

45% yield, *iso/n* = 20/80;  $^1\text{H NMR}$  (400 MHz,  $\text{CDCl}_3$ )  $\delta$  11.76 (s, br, 1H), 7.34-7.22 (m, 2H), 6.99-6.89 (m, 2H), 3.89 (s, 3H), 3.03 (t,  $J = 7.8$  Hz, 2H), 2.75 (t,  $J = 7.8$  Hz, 2H).  $^{13}\text{C NMR}$  (100 MHz,  $\text{CDCl}_3$ )  $\delta$  180.2, 157.5, 130.0, 128.5, 127.8, 120.5, 110.3, 55.2, 34.1, 26. Data are in accordance with those reported in ref. [5].

3-(2-chlorophenyl) propionic acid, **3s**

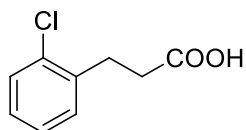

White solid; m.p. 85-86 °C; 76% yield, *iso/n* = 1/99;  $^1\text{H NMR}$  (400 MHz,  $\text{CDCl}_3$ )  $\delta$  7.41-7.24 (m, 4H), 3.12 (t,  $J = 7.6$  Hz, 2H), 2.77 (t,  $J = 7.6$  Hz, 2H).  $^{13}\text{C NMR}$  (100 MHz,  $\text{CDCl}_3$ )  $\delta$  179.0, 137.8, 134.1, 130.6, 129.7, 128.1, 127.1, 33.8, 28.7. Data are in accordance with those reported in ref. [5].

3-(2-bromophenyl) propanoic acid, **3y**

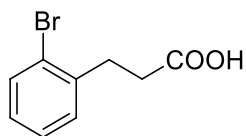

White solid; 99-102 °C; 68% yield, *iso/n* = 2/98;  $^1\text{H NMR}$  (400 MHz,  $\text{CDCl}_3$ )  $\delta$  11.69 (s, br, 1H), 7.42-7.21 (m, 4H), 3.13 (t,  $J$  = 7.7 Hz, 2H), 2.78 (t,  $J$  = 7.7 Hz, 2H).  $^{13}\text{C NMR}$  (100 MHz,  $\text{CDCl}_3$ )  $\delta$  179.5, 137.7, 134.0, 130.54, 129.7, 128.1, 127.1, 33.8, 28.7. Data are in accordance with those reported in ref. [19].

4-phenylbutanoic acid, **3z**

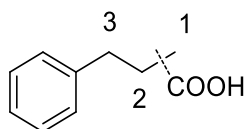

89% yield, 1/2/3 = 82/17/1 (The regioselectivity was measured by GC analysis); **3z**:  $^1\text{H NMR}$  (400 MHz,  $\text{CDCl}_3$ )  $\delta$  7.34-7.29 (m, 2H), 7.24 (t,  $J$  = 7.6 Hz, 3H), 2.72 (t,  $J$  = 7.5 Hz, 2H), 2.42 (t,  $J$  = 7.5 Hz, 2H), 2.05-1.99 (m, 2H).  $^{13}\text{C NMR}$  (100 MHz,  $\text{CDCl}_3$ )  $\delta$  180.3, 141.4, 128.7, 128.6, 126.2, 35.2, 33.6, 26.4. Data are in accordance with those reported in ref. [20].

4-methylhexanoic acid, **3aa**

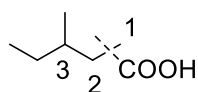

53% yield, 1/2/3 = 93/2/5 (The regioselectivity was measured by GC analysis); **3aa**:  $^1\text{H NMR}$  (400 MHz,  $\text{CDCl}_3$ )  $\delta$  2.47-2.24 (m, 2H), 1.72-1.64 (m, 1H), 1.47-1.33 (m, 3H), 1.20-1.12 (m, 1H), 0.89-0.86 (m, 6H).  $^{13}\text{C NMR}$  (100 MHz,  $\text{CDCl}_3$ )  $\delta$  180.8, 33.9, 31.9, 31.2, 29.1, 18.8, 11.3. Data are in accordance with those reported in ref. [21].

## 5. References:

- (1) M. J. Frisch, W. G. Trucks, H. B. Schlegel, G. E. Scuseria, M. A. Robb, J. R. Cheeseman, G. Scalmani, V. Barone, B. Mennucci, G. A. Petersson, H. Nakatsuji, M. Caricato, X. Li, H. P. Hratchian, A. F. Izmaylov, J. Bloino, G. Zheng, J. L. Sonnenberg, M. Hada, M. Ehara, K. Toyota, R. Fukuda, J. Hasegawa, T. Ishida, Y. Honda, O. Kitao, H. Nakai, T. Vreven, J. A. Montgomery, J. E. Peralta, F. Ogliaro, M. Bearpark, J. J. Heyd, E. Brothers, K. N. Kudin, V. N. Staroverov, T. Keith, R. Kobayashi, J. Normand, K. Raghavachari, A. Rendell, J. C. Burant, S. S. Iyengar, J. Tomasi, M. Cossi, N. Rega, J. M. Millam, M. Klene, J. E. Knox, J. B. Cross, V. Bakken, C. Adamo, J. Jaramillo, R. Gomperts, R. E. Stratmann, O. Yazyev, A. J. Austin, R. Cammi, C. Pomelli, J. W. Ochterski, R. L. Martin, K. Morokuma, V. G. Zakrzewski, G. A. Voth, P. Salvador, J. J. Dannenberg, Dapprich, A. D. Daniels, O. Farkas, J. B. Foresman, V. J. Ortiz, J. Cioslowski, and D. J. Fox, Gaussian, Inc., Wallingford CT, 2013.
- (2) H. Li, K. Dong, H. Jiao, H. Neumann, R. Jackstell, M. Beller, *Nature Chem.*, 2016, **8**, 1159.
- (3) J. E. Milne, T. Storz, J. T. Colyer, *J. Org. Chem.*, 2011, **76**, 9519.
- (4) M. D. Greenhalgh, S. P. Thomas, *J. Am. Chem. Soc.*, 2012, **134**, 11900.
- (5) (a) W. Liu, W. Ren, Y. Shi, et al. *Org. Lett.*, 2017, **19**, 1748.
- (6) C. M. Williams, J. B. Johnson, T. Rovis, *J. Am. Chem. Soc.*, 2008, **130**, 14936.
- (7) M. Ohkoshi, J. Michinishi, H. Senboku, *Tetrahedron*, 2010, **66**, 7732.
- (8) A. Aramini, M. R. Sablone, G. Bianchini, et al., *Tetrahedron*, 2012, **65**, 2015.
- (9) T. Muller, L. Johann, E. D. Charvet, et al. *J. Am. Chem. Soc.*, 2011, **133**, 11557.
- (10) T. M. Konrad, J. T. Durrani, M. L. Clarke, *Chem. Commun.*, 2013, **49**, 3306.
- (11) I. Shiina, K. Nakata, M. Itagaki, et al. *J. Am. Chem. Soc.*, 2010, **132**, 11629.
- (12) (a) A. Mai, M. Artico, J. A. Este, et al. *J. Med. Chem.*, 2007, **50**, 5412. (b) J. Li, D. Liu, W. Zhang, *Org. Lett.*, 2016, **18**, 2122.
- (13) L. R. Cafiero, T. S. Snowden, *Org. Lett.*, 2008, **10**, 3853.
- (14) Y. Zhang, J. Jiao, Flowers, II, R. A. *J. Org. Chem.*, 2006, **71**, 4516.
- (15) N. R. Vautravers, B. Breit, *Synlett*, 2011, **17**, 2517.
- (16) A. J. Pearson, K. Lee, *J. Org. Chem.*, 1994, **59**, 2257.
- (17) J. B. Arterburn, M. Pannala, R. M. Chamberlin, et al., *Tetrahedron Lett.*, 2000, **41**, 7847.
- (18) M. Lima, K. A. D. Castro, H. Rhee, *Appl. Organometal. Chem.*, 2011, **25**, 1.
- (19) A. Stöbel, M. Gütschow, C. E. Müller, et al. *J. Med. Chem.*, 2013, **56**, 4580.
- (20) A. C. Bonaparte, M. P. Betush, S. S. Murphree, et al. *Org. Lett.*, 2011, **13**, 1447.
- (21) K. Mori, S. Kuwahara, H. Ueda, *Tetrahedron*, 1983, **39**, 2439.

## 6. Copies of product spectra

2-phenylpropionic acid, **2a**

400 MHz, CDCl<sub>3</sub>

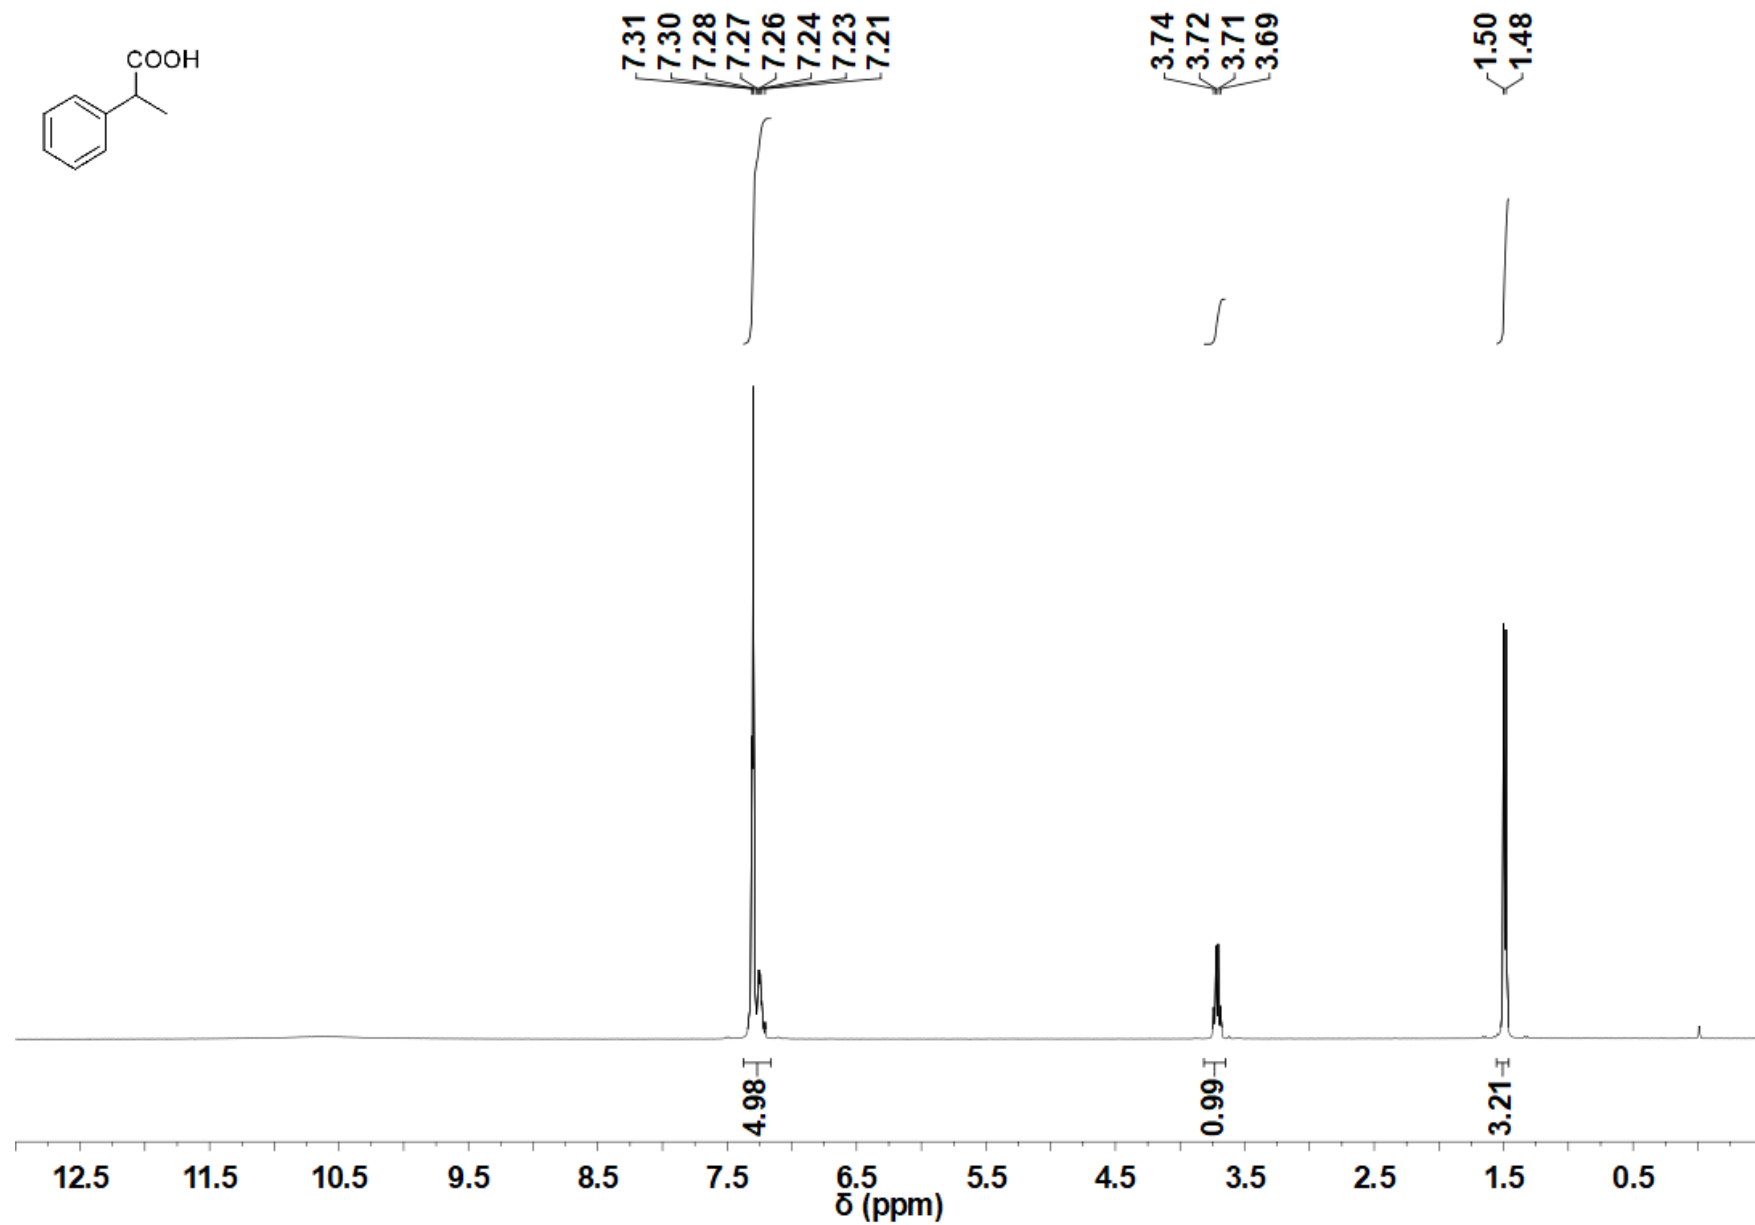



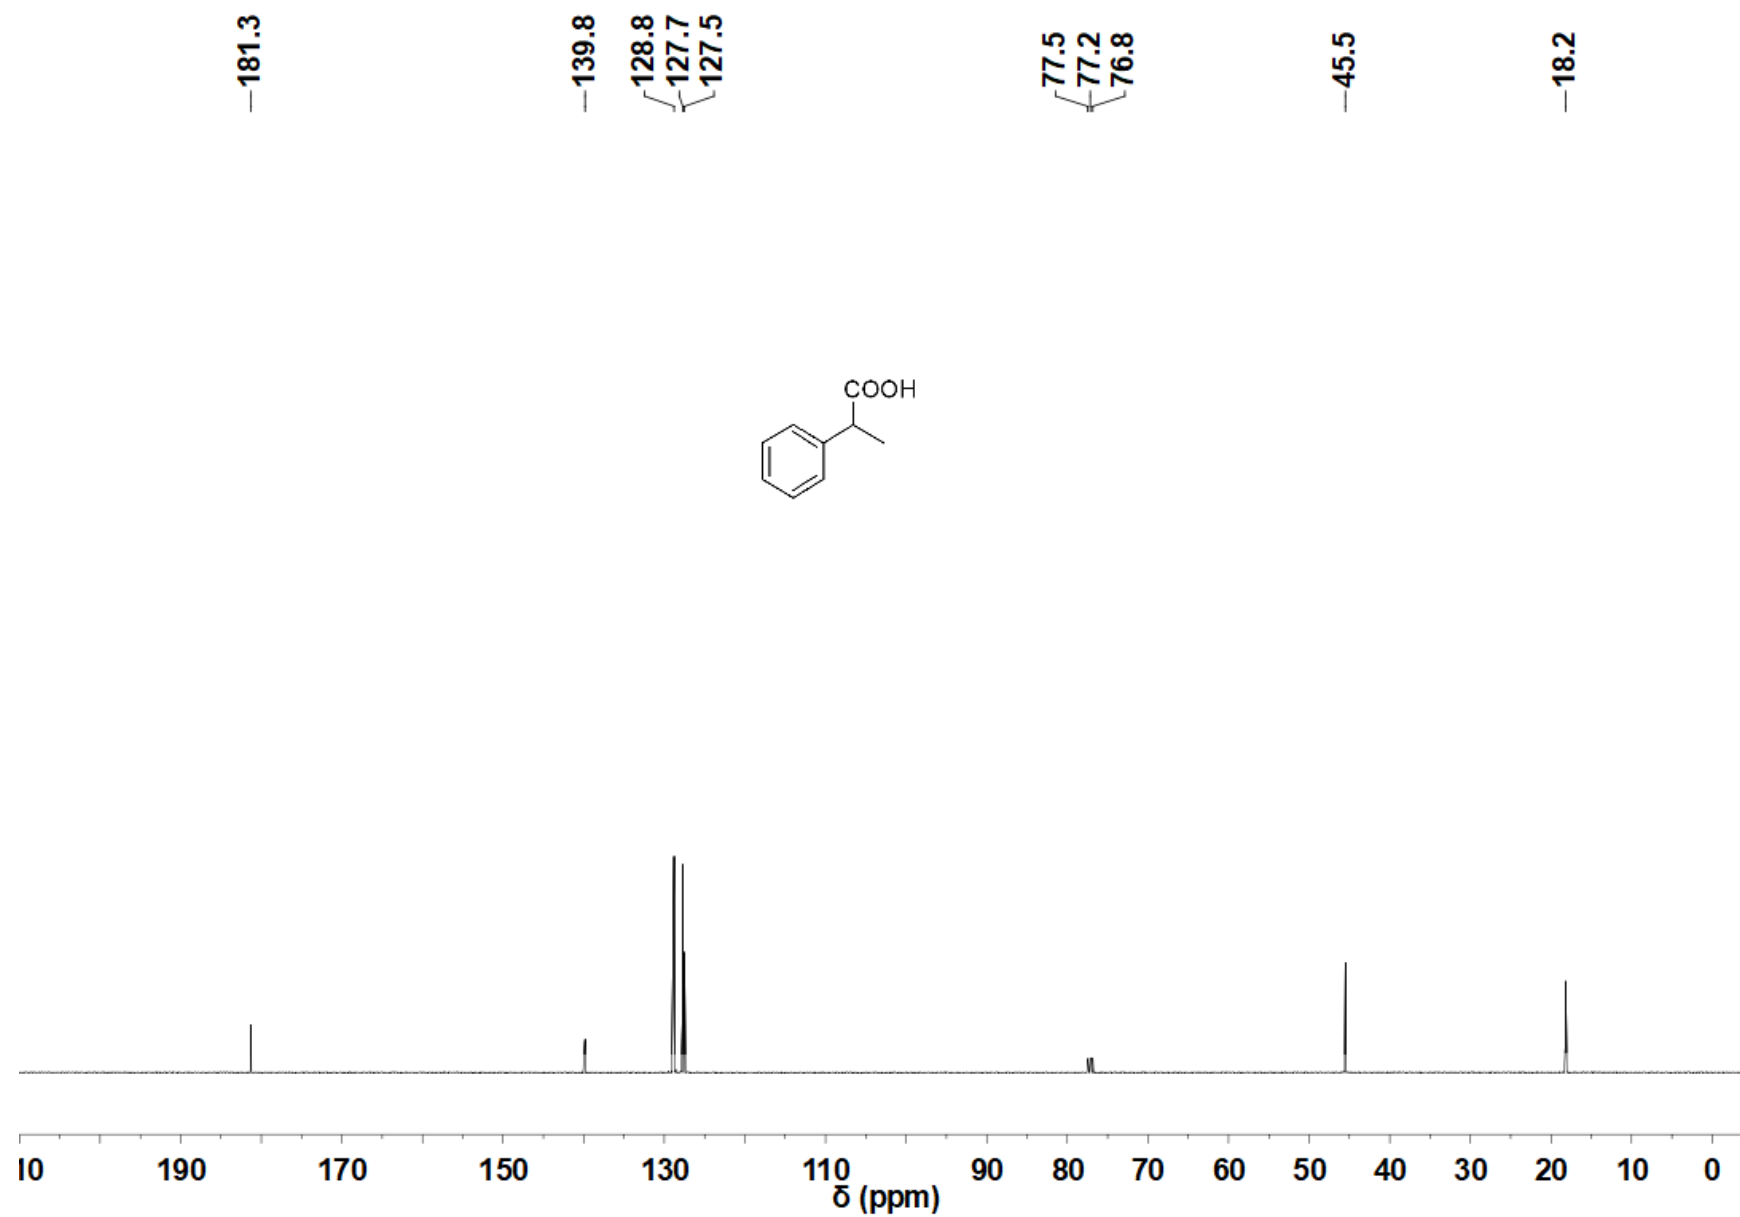

2-(4-methylphenyl) propanoic acid, **2b**  
400 MHz, CDCl<sub>3</sub>

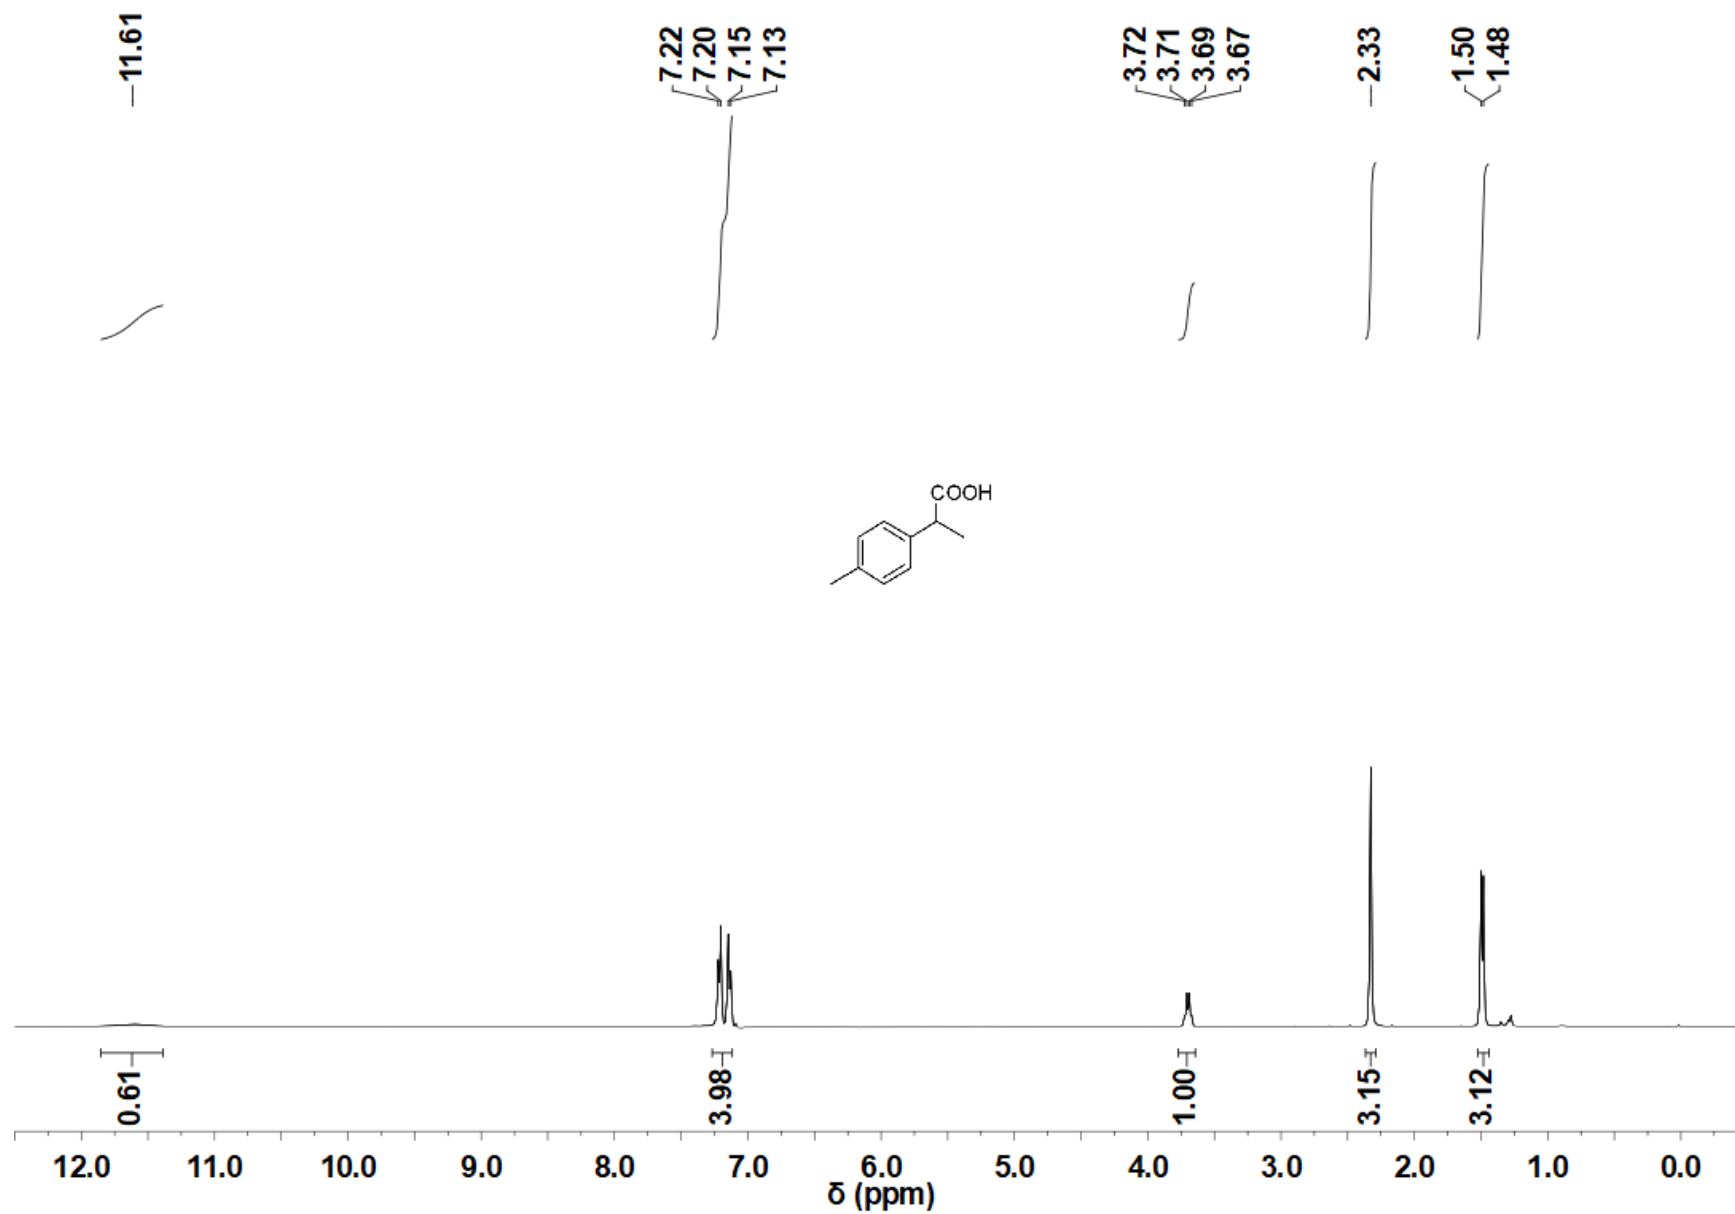

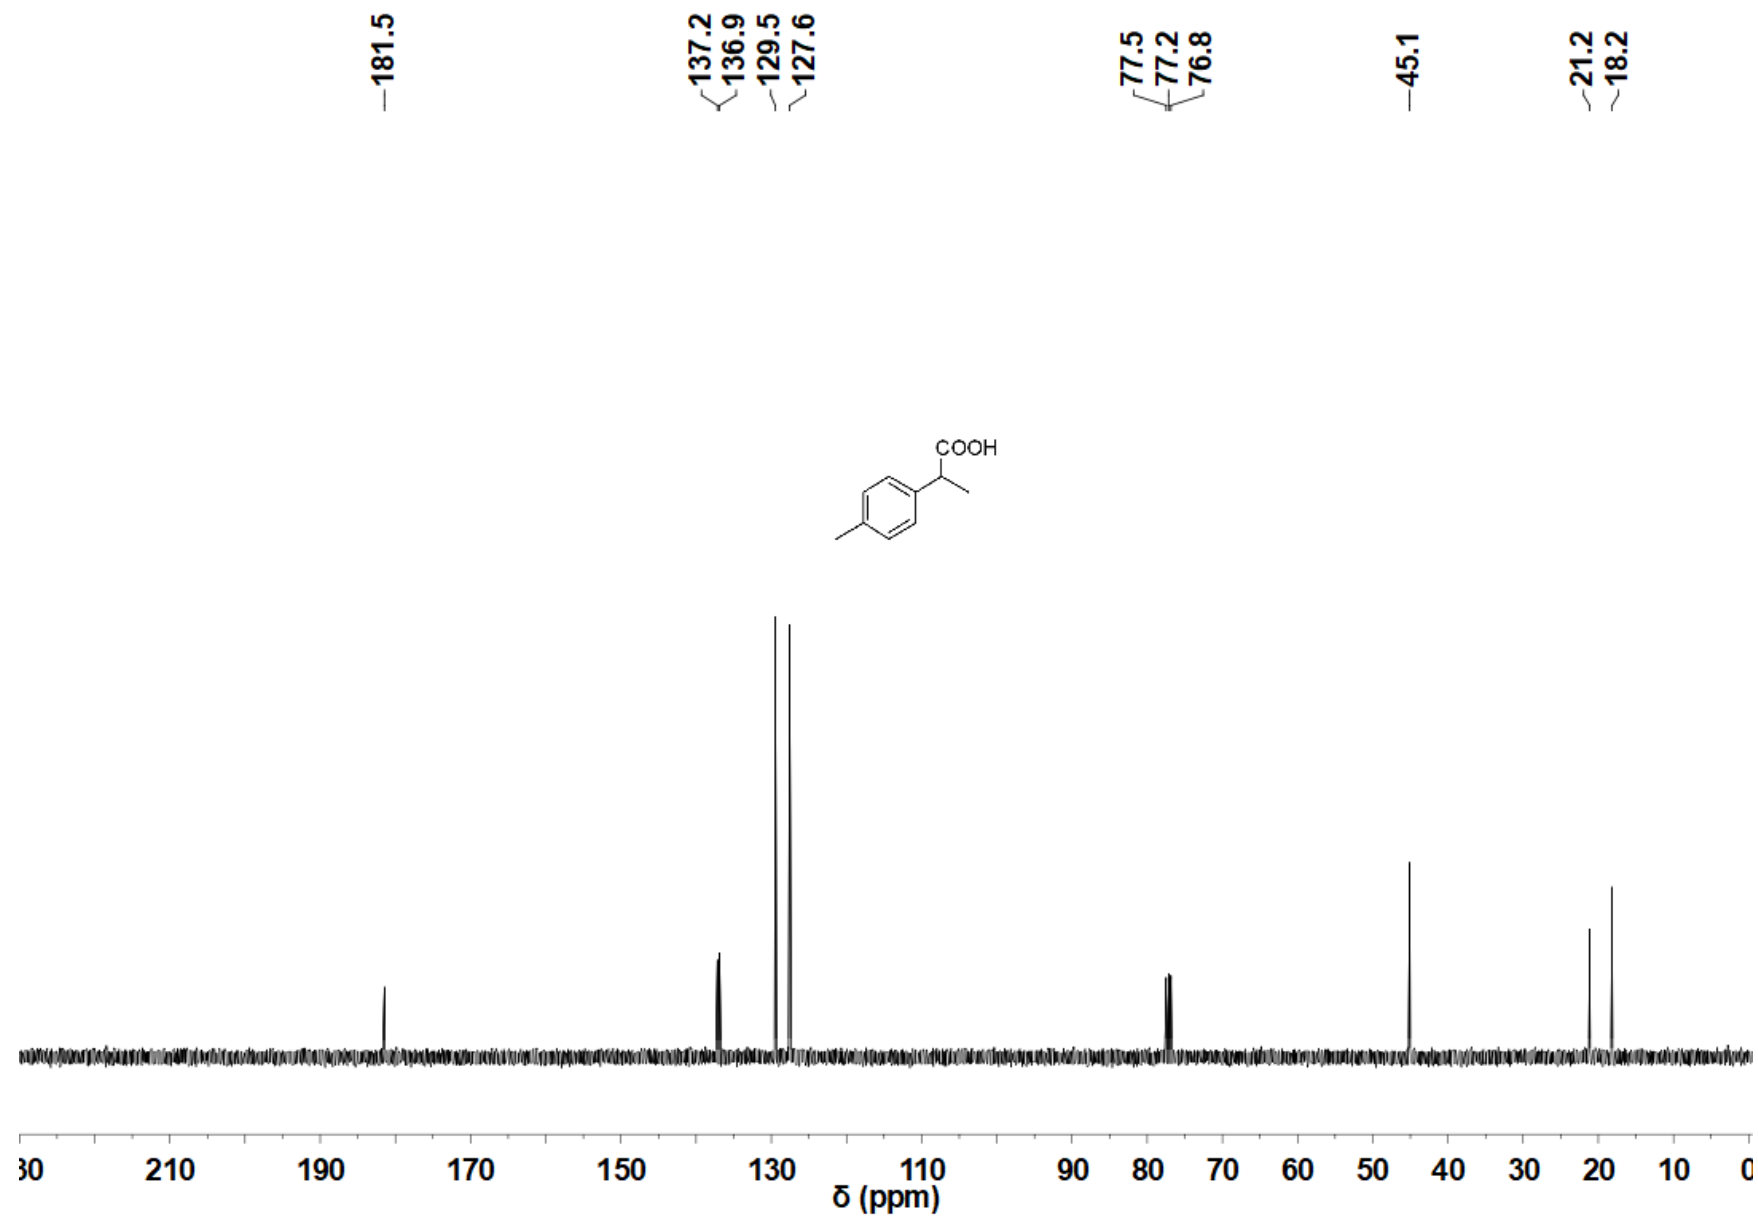

2-(4-methoxyphenyl) propanoic acid, **2c**  
400 MHz, CDCl<sub>3</sub>

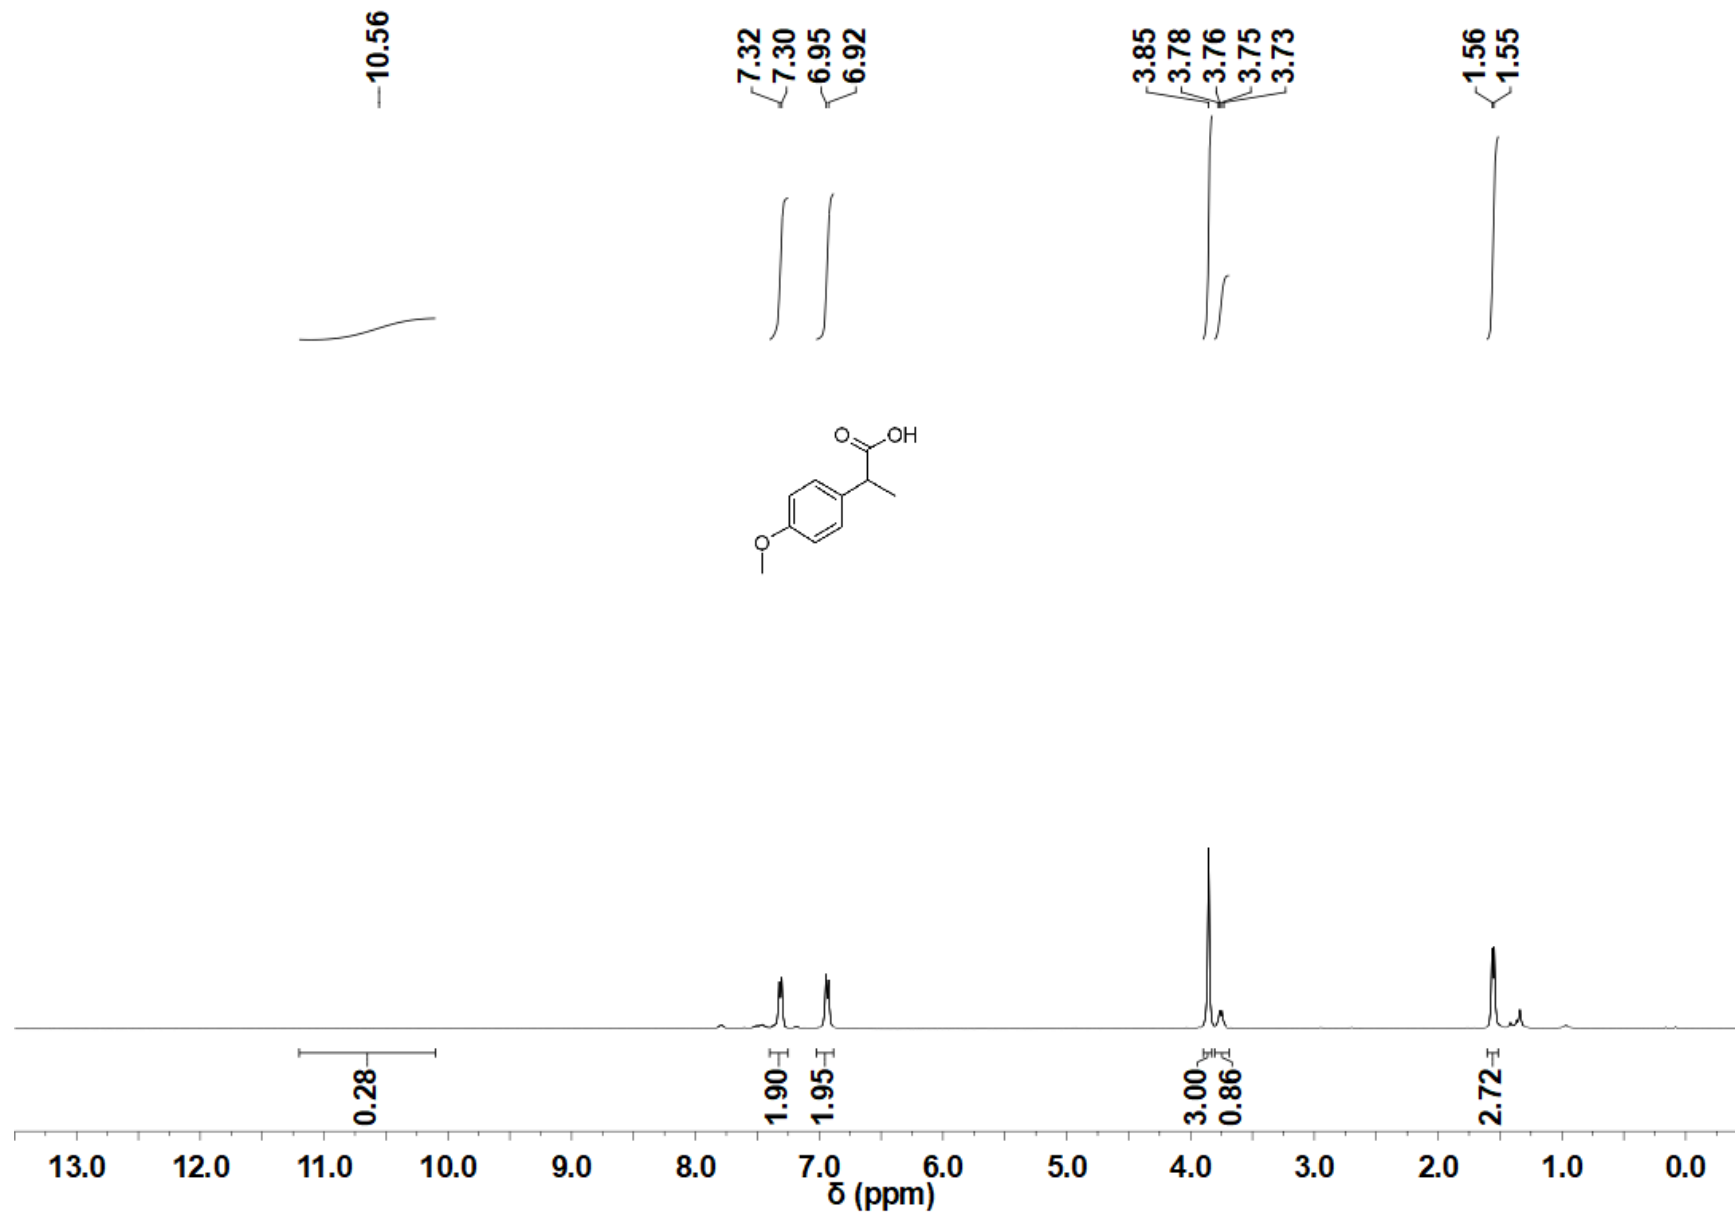

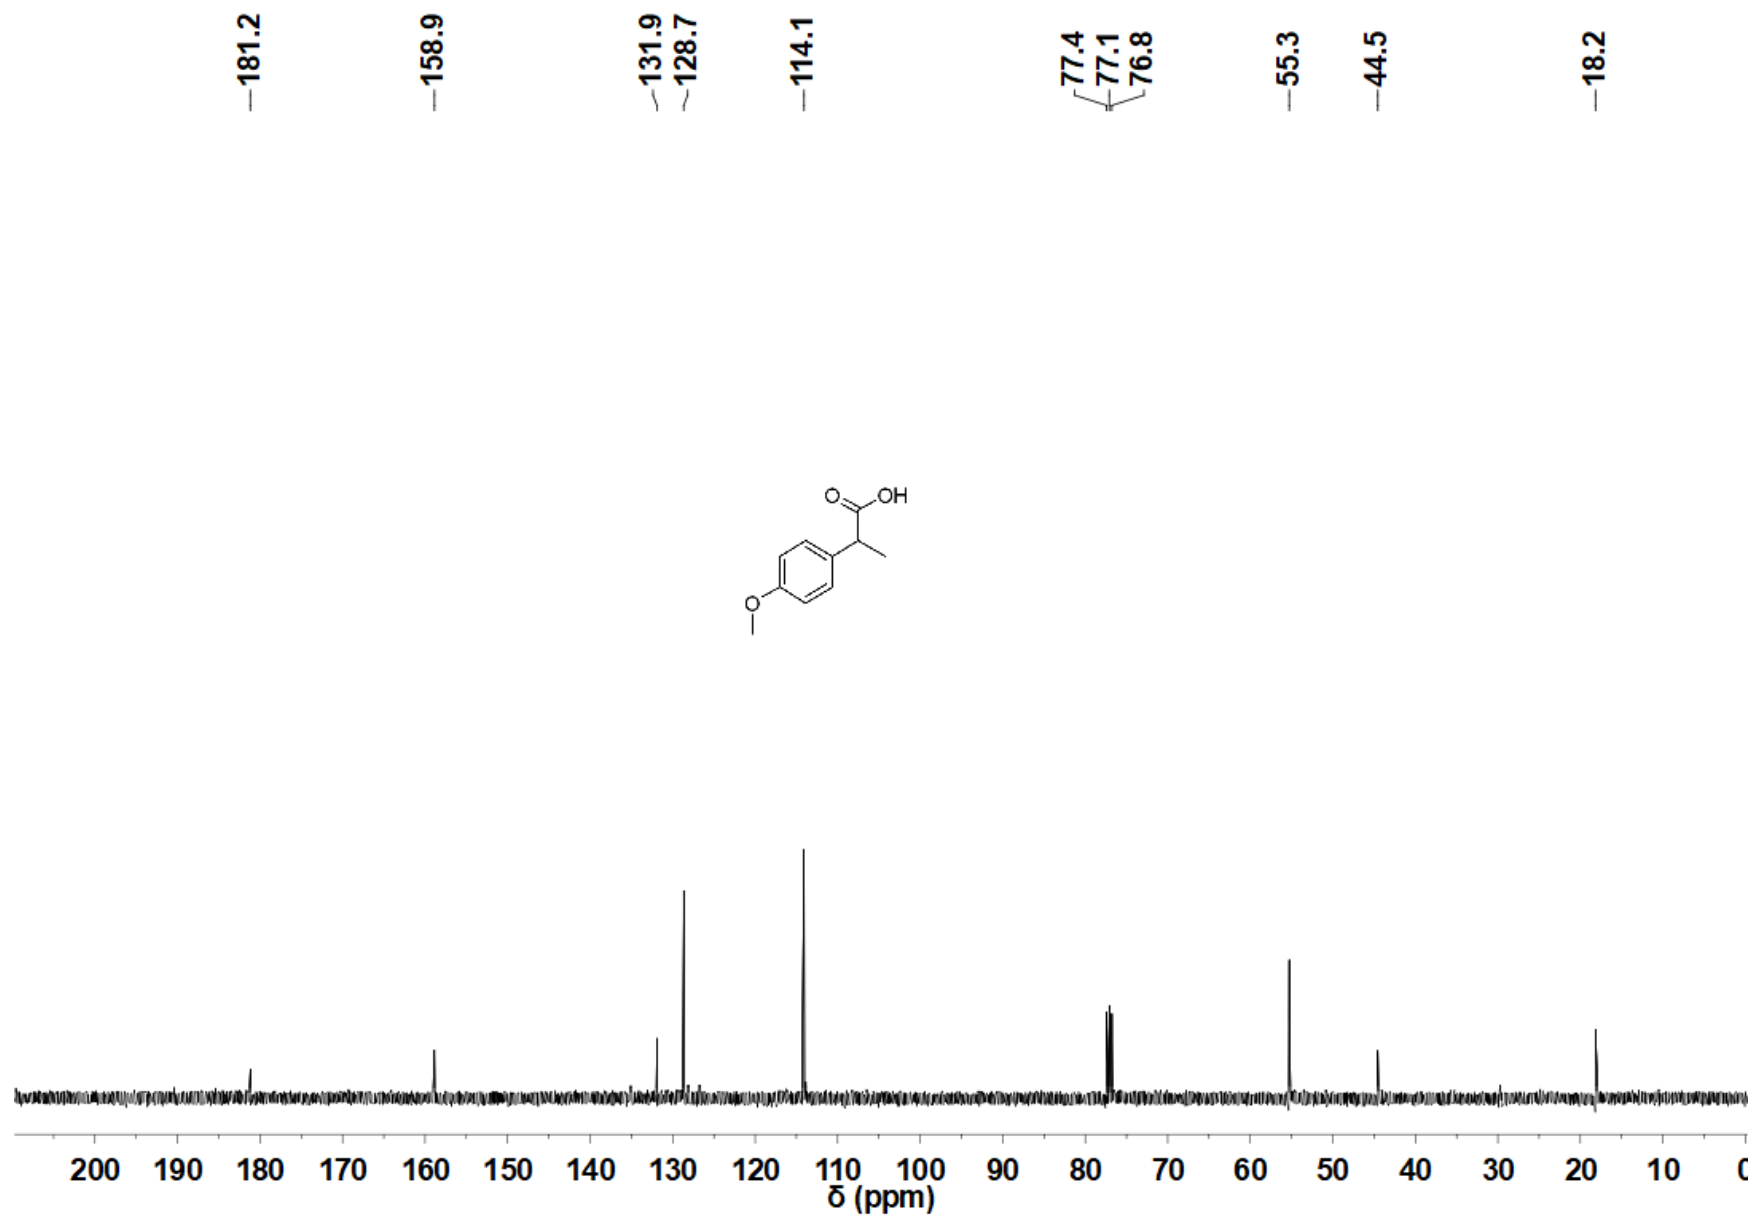

2-(4-(tert-butyl) phenyl) propanoic acid, **2d**  
400 MHz, CDCl<sub>3</sub>

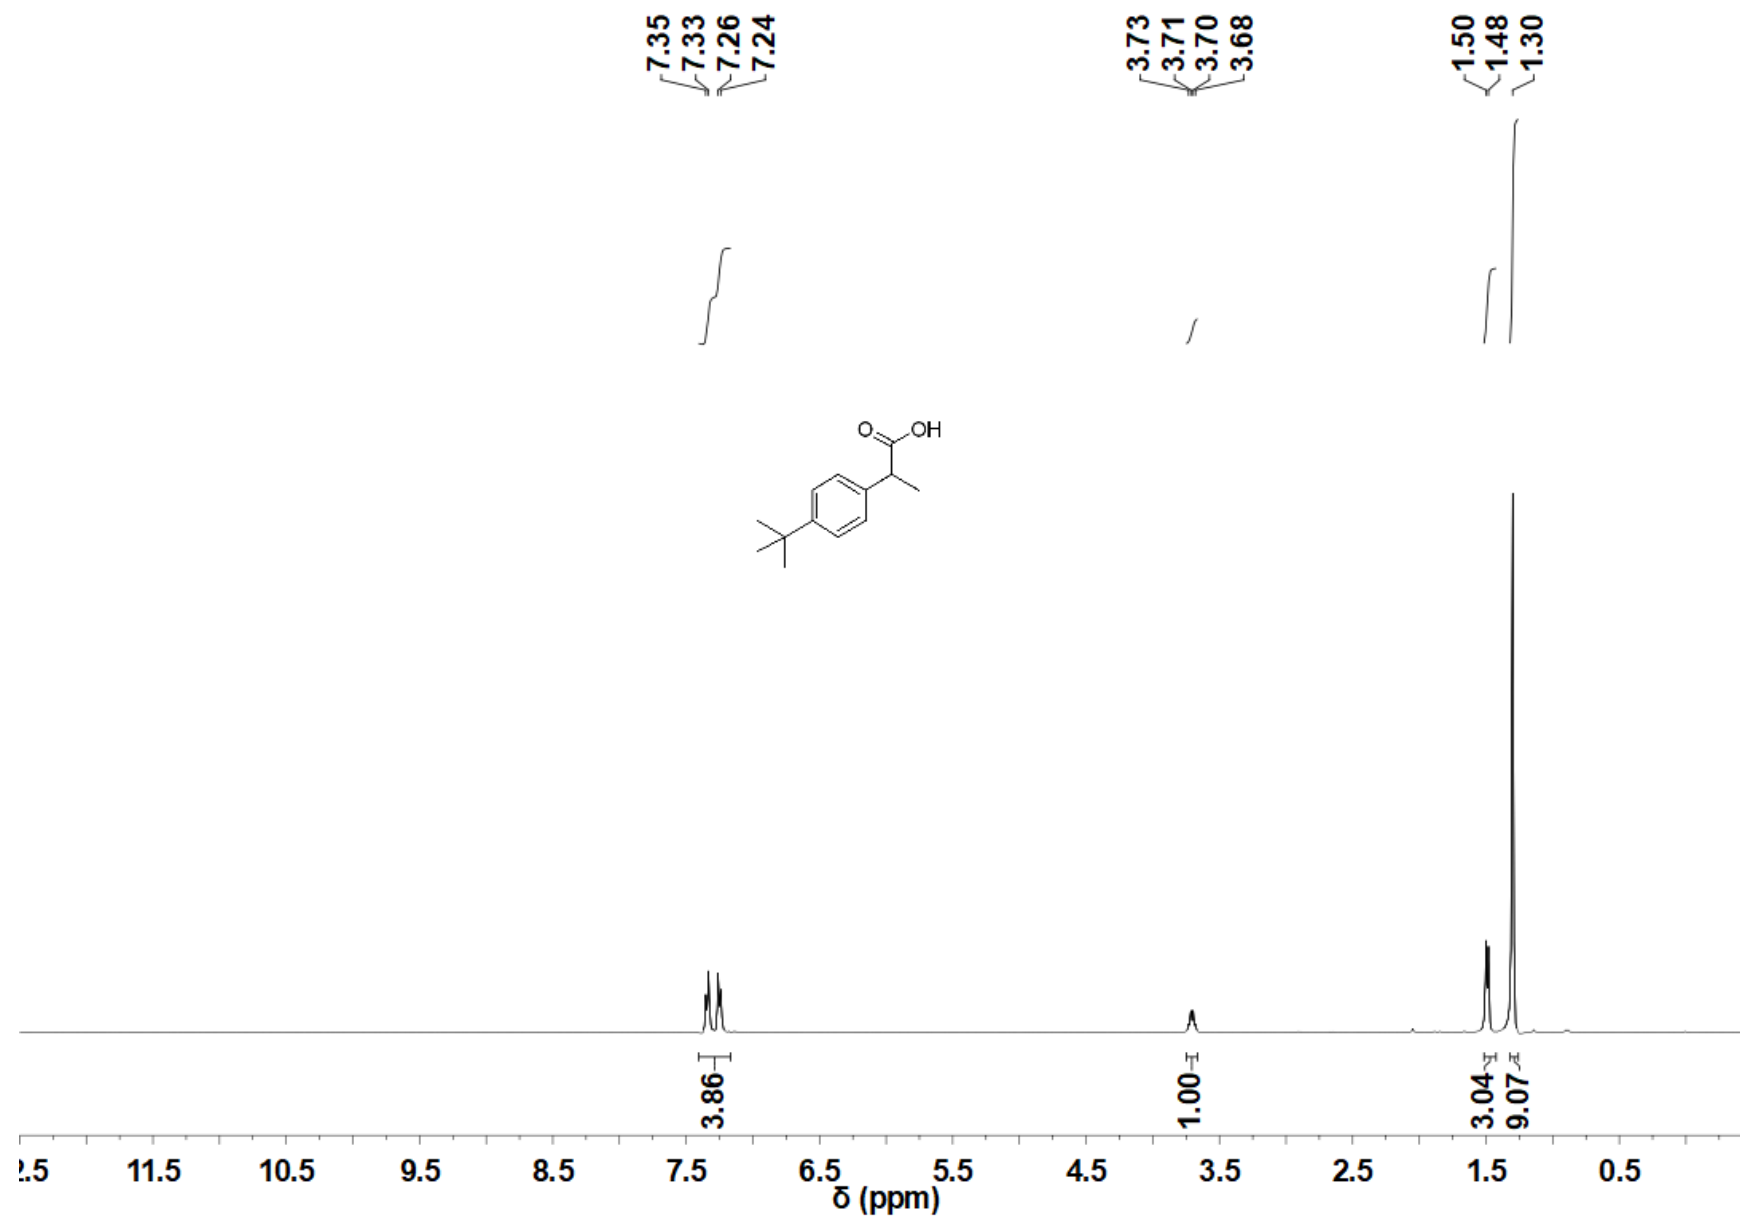

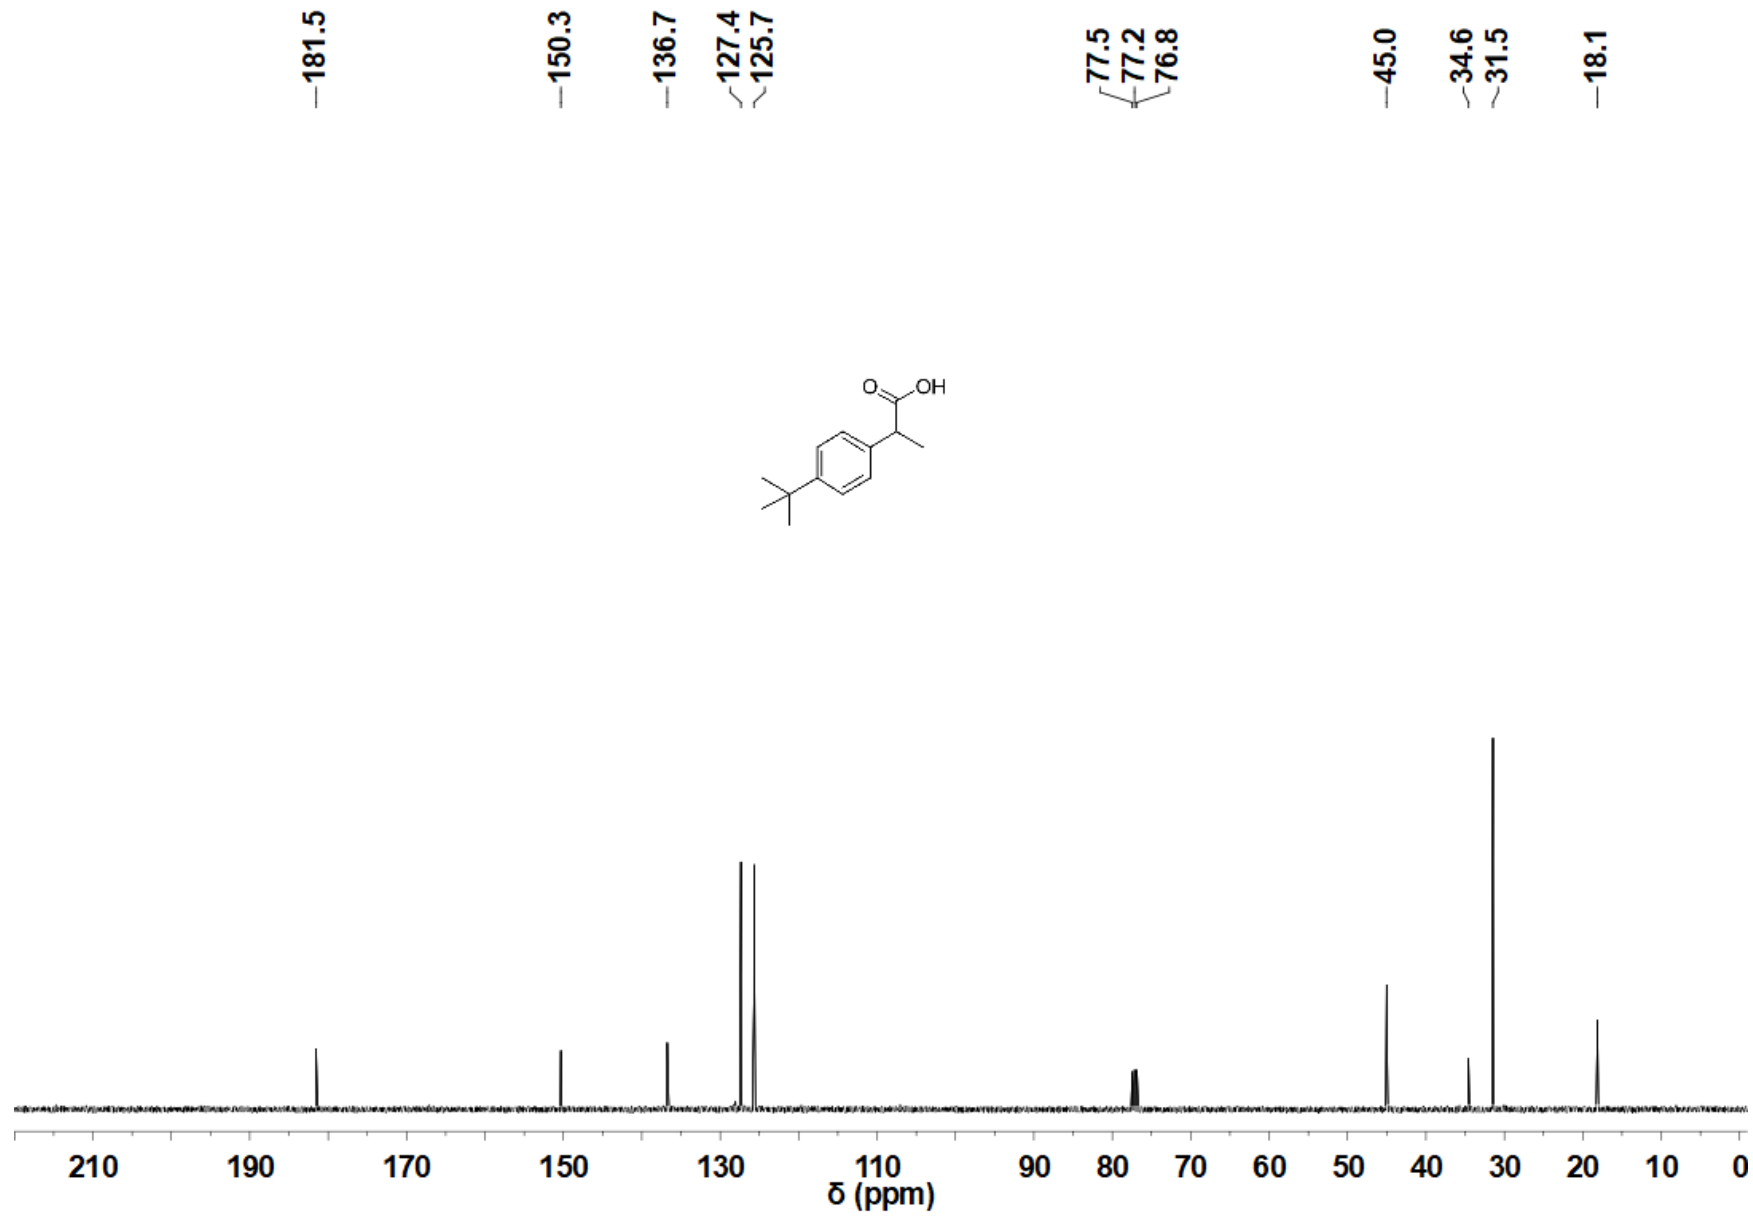

2-(4-fluorophenyl) propionic acid, **2e**  
400 MHz, CDCl<sub>3</sub>

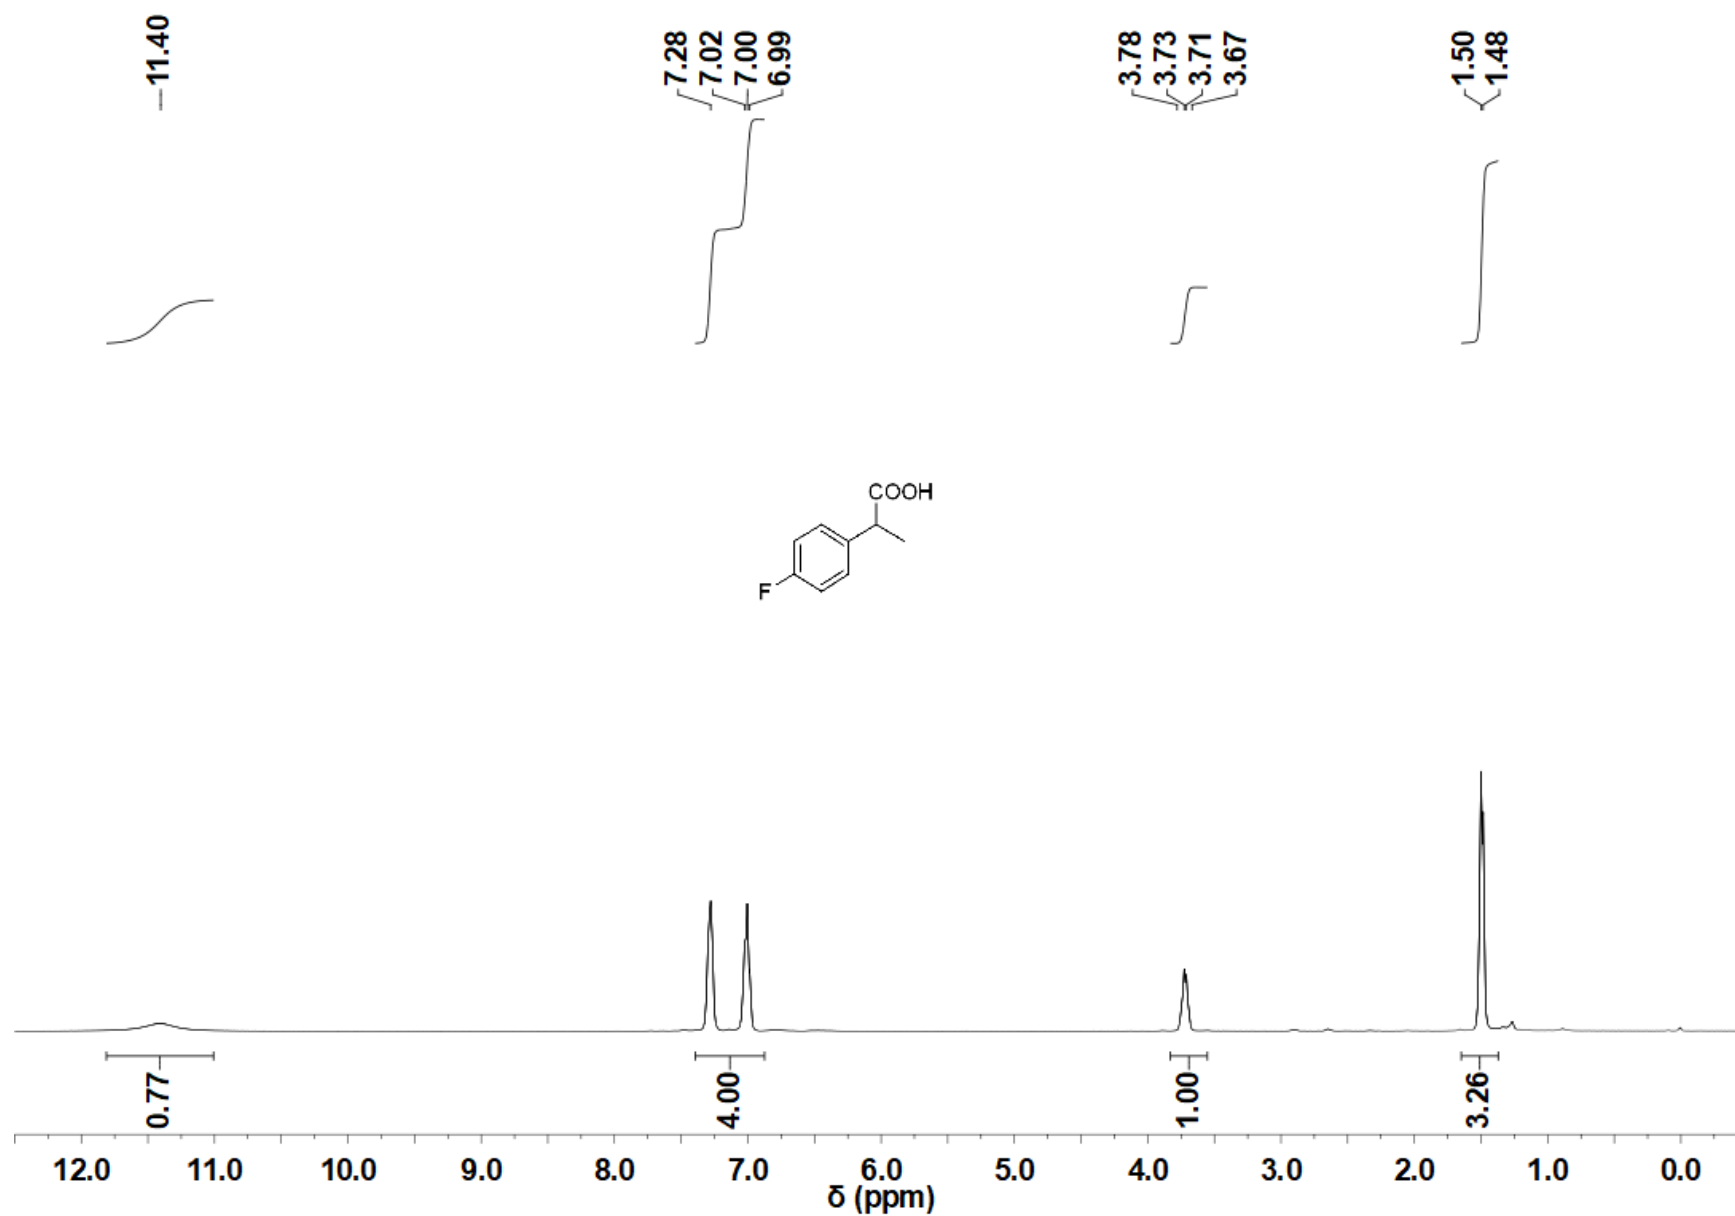



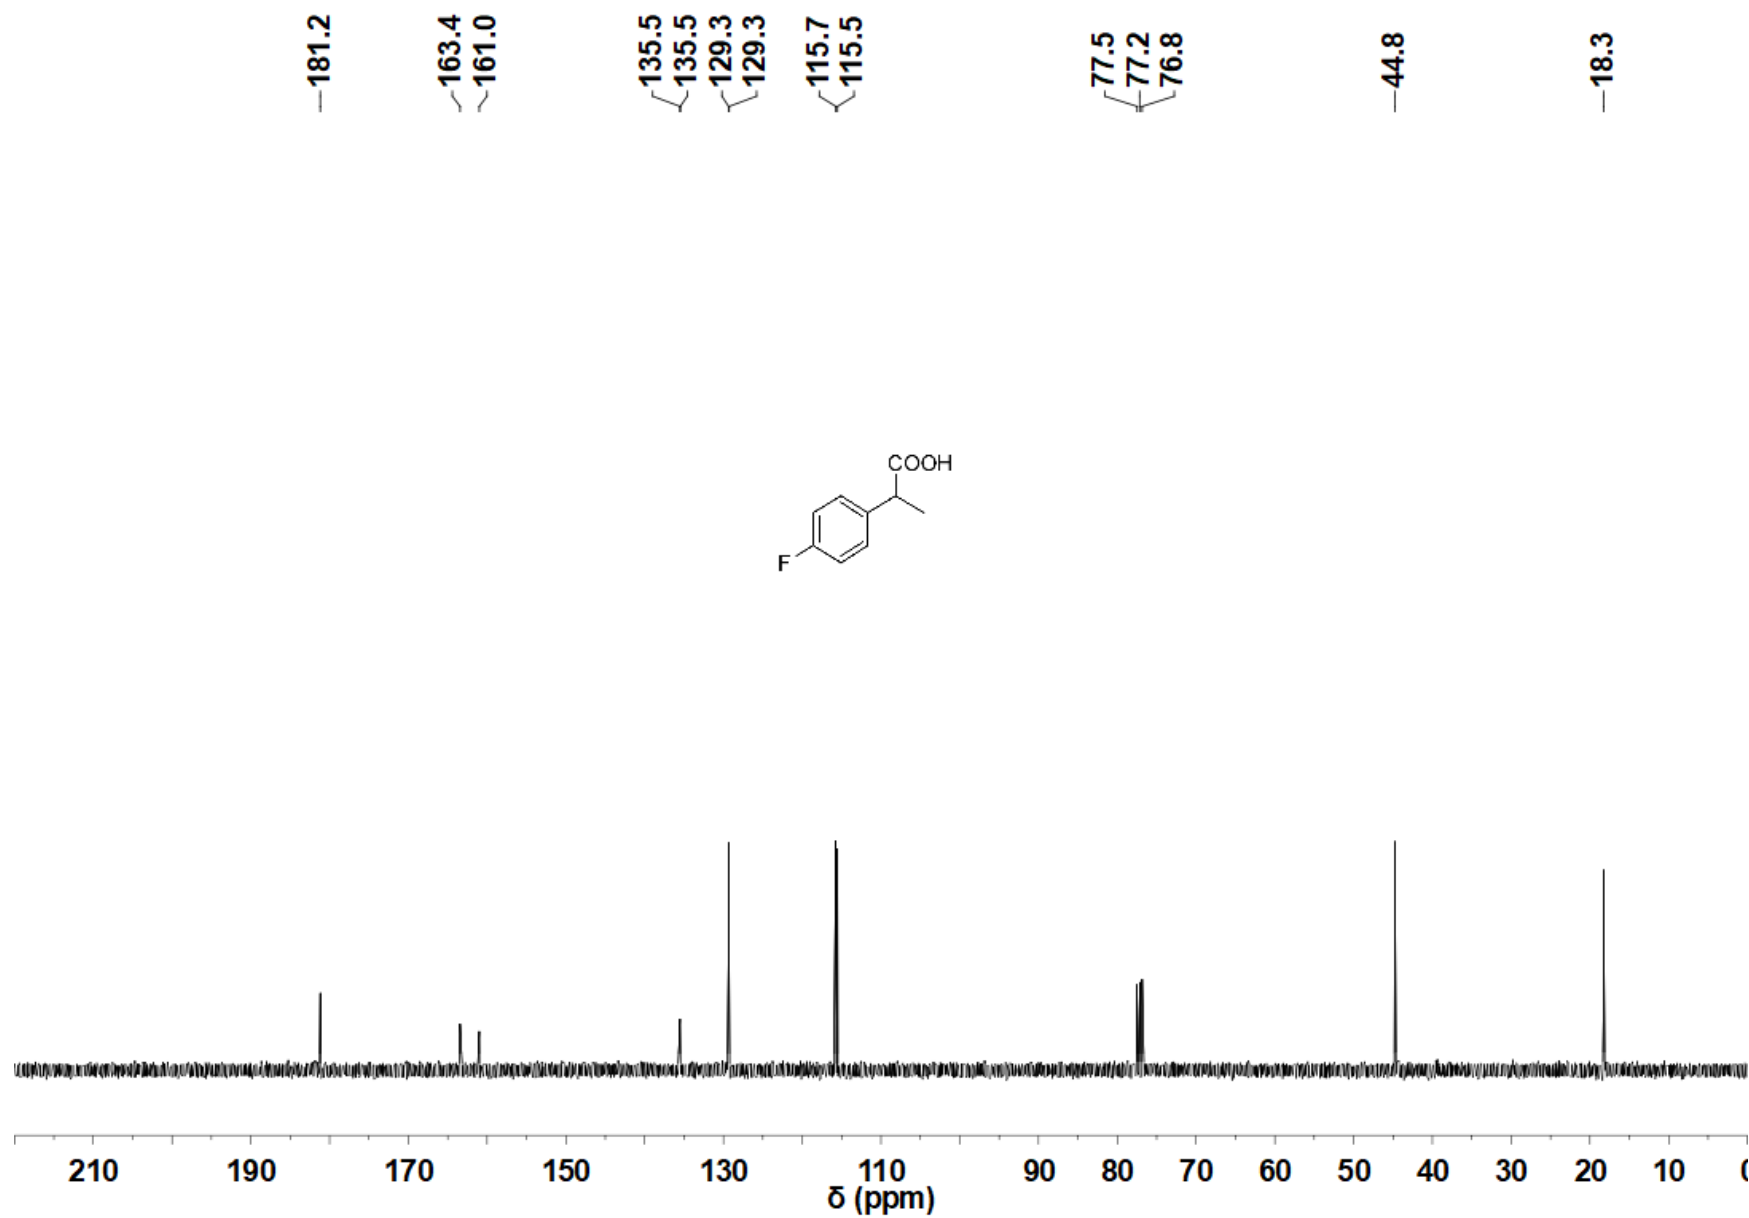

2-(4-chlorophenyl) propionic acid, **2f**  
400 MHz, CDCl<sub>3</sub>

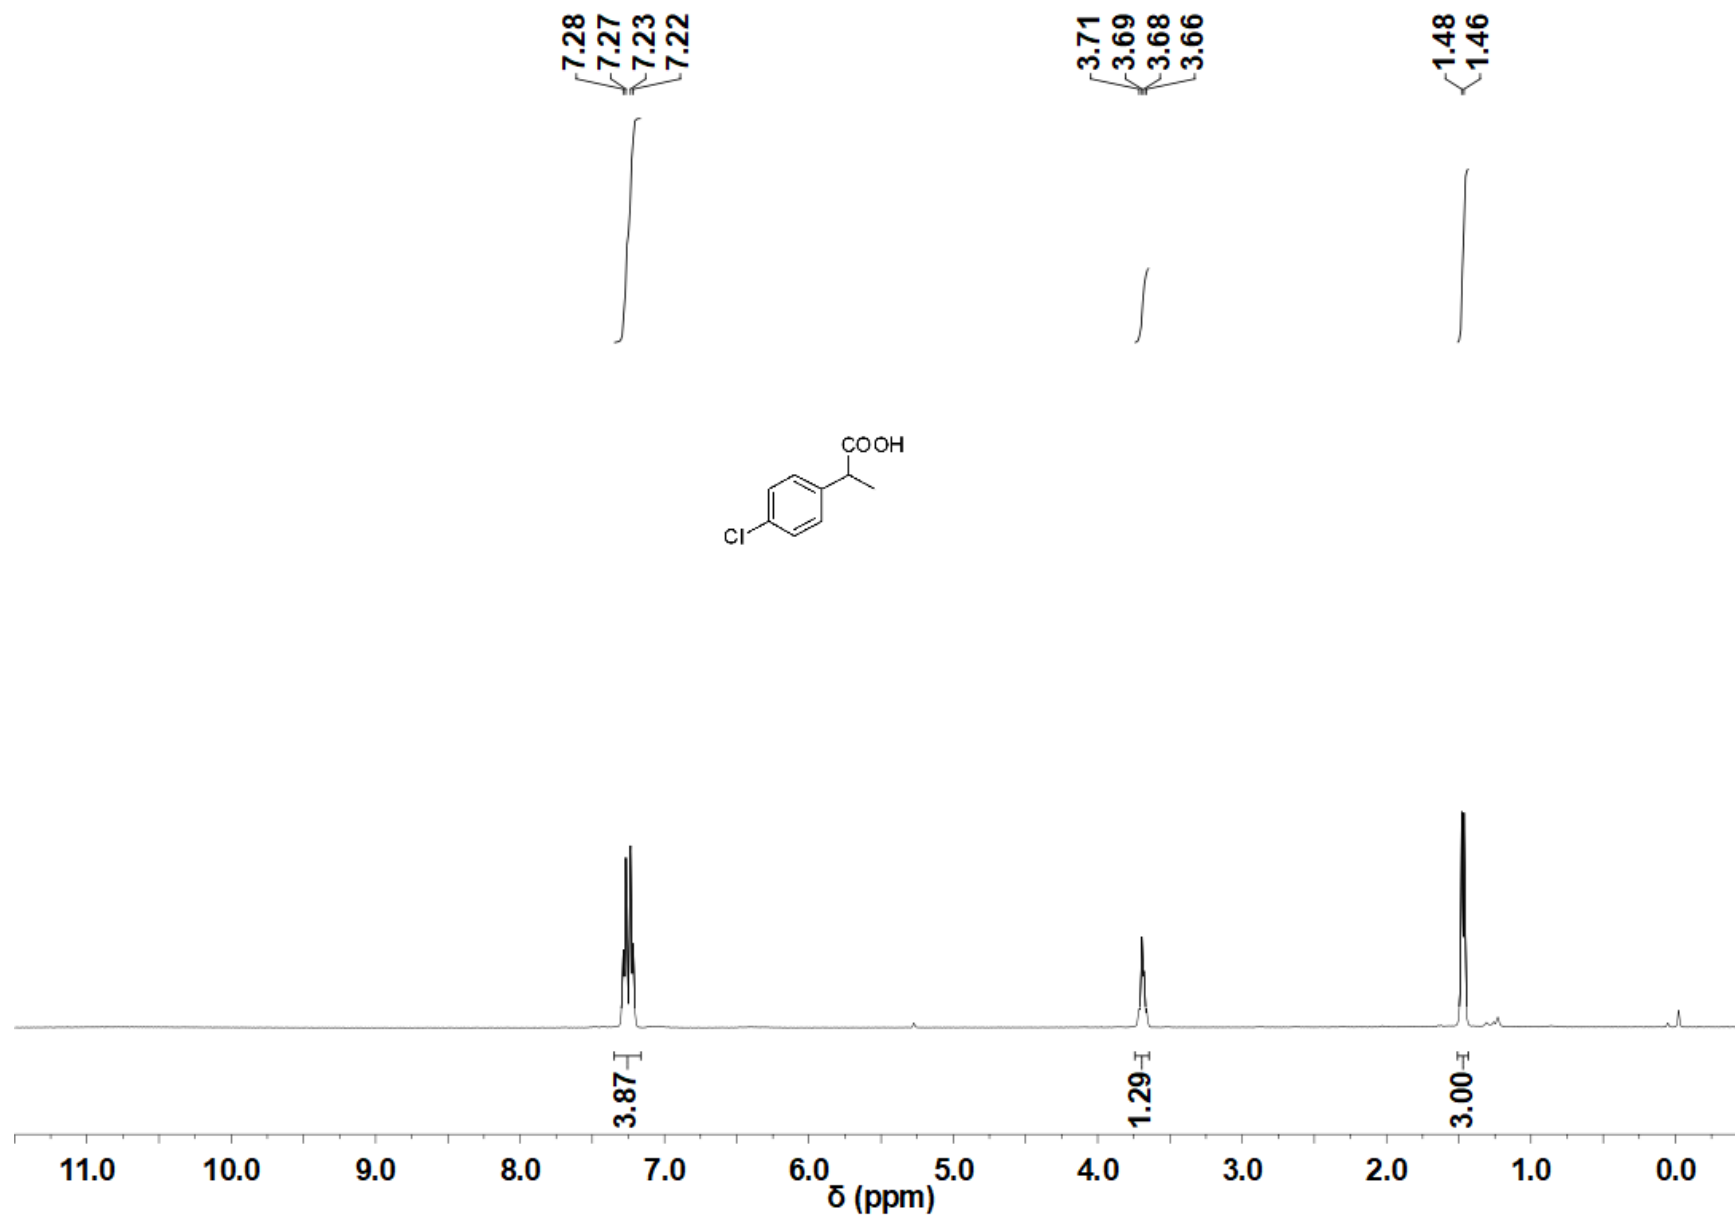

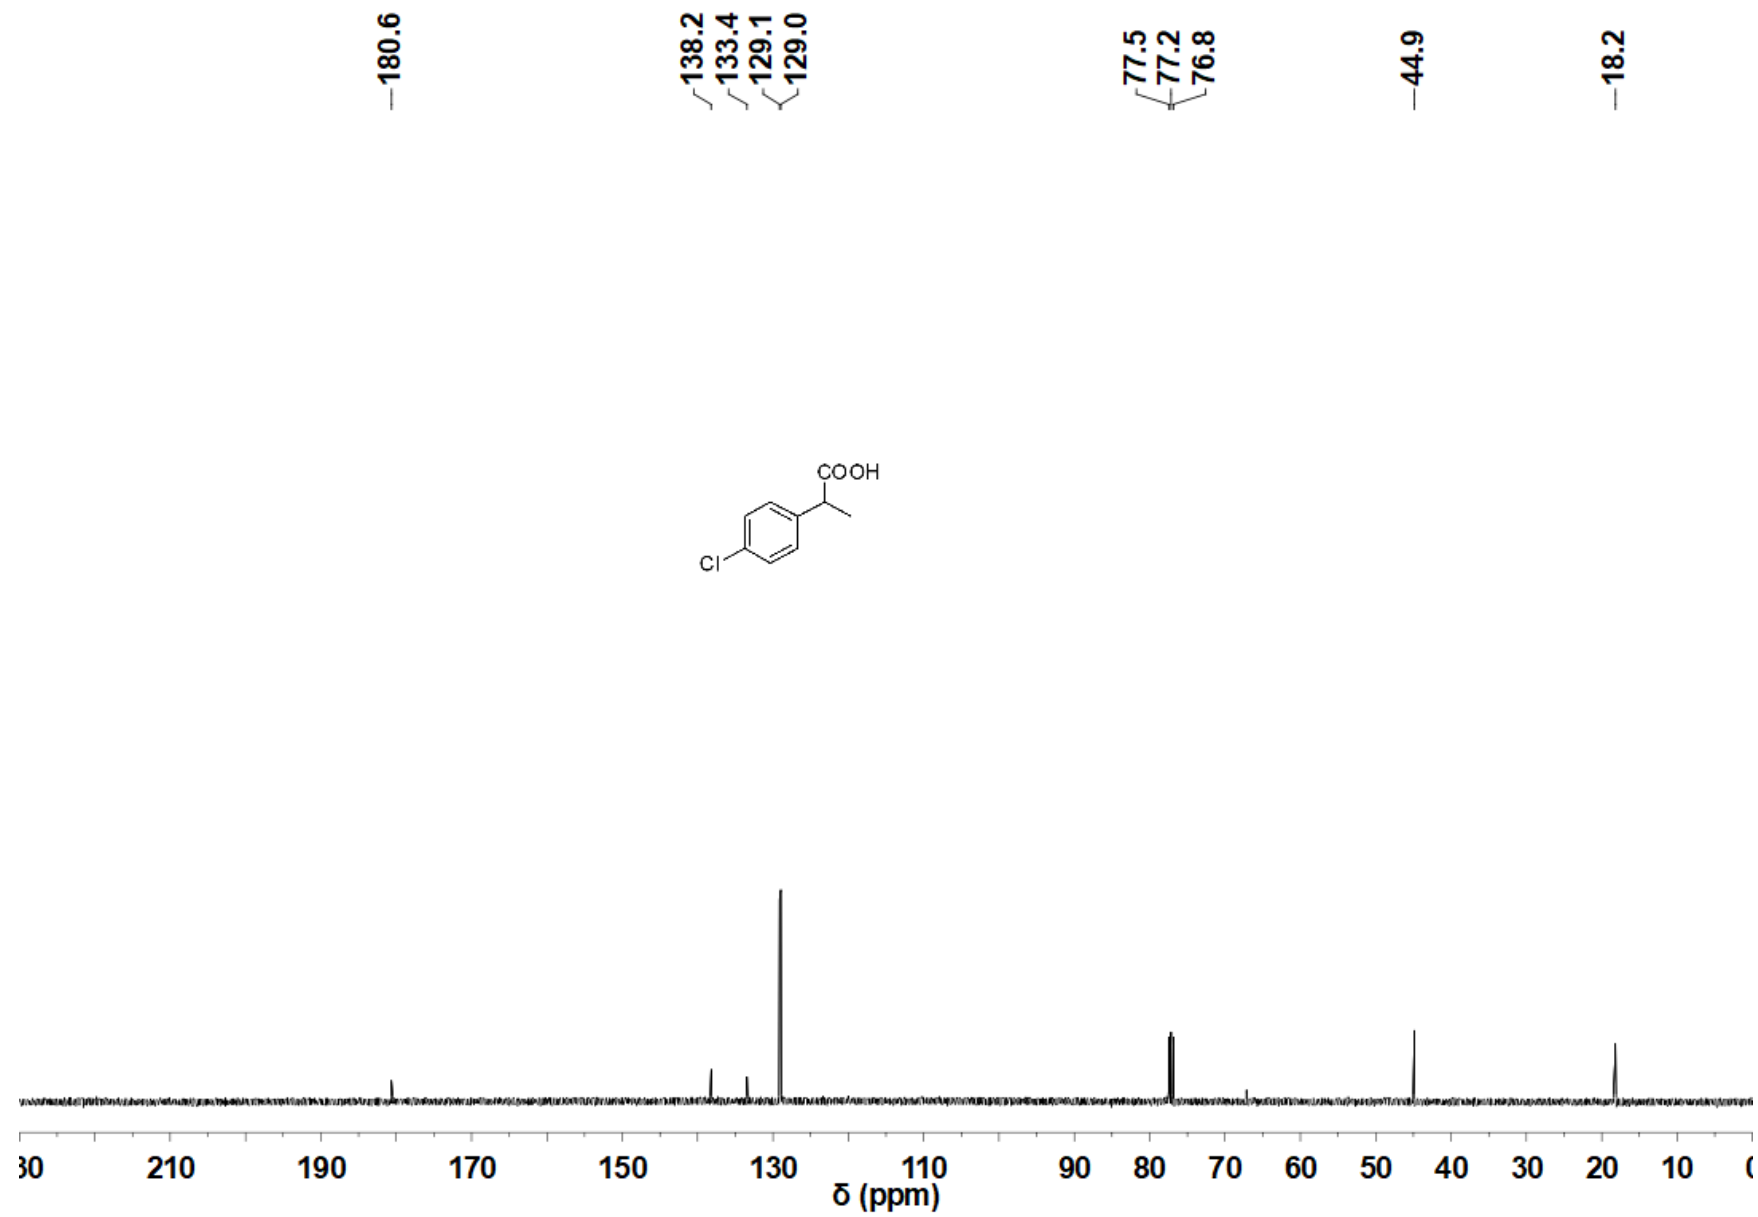

2-(4-bromophenyl) propanoic acid, **2g**  
400 MHz, CDCl<sub>3</sub>

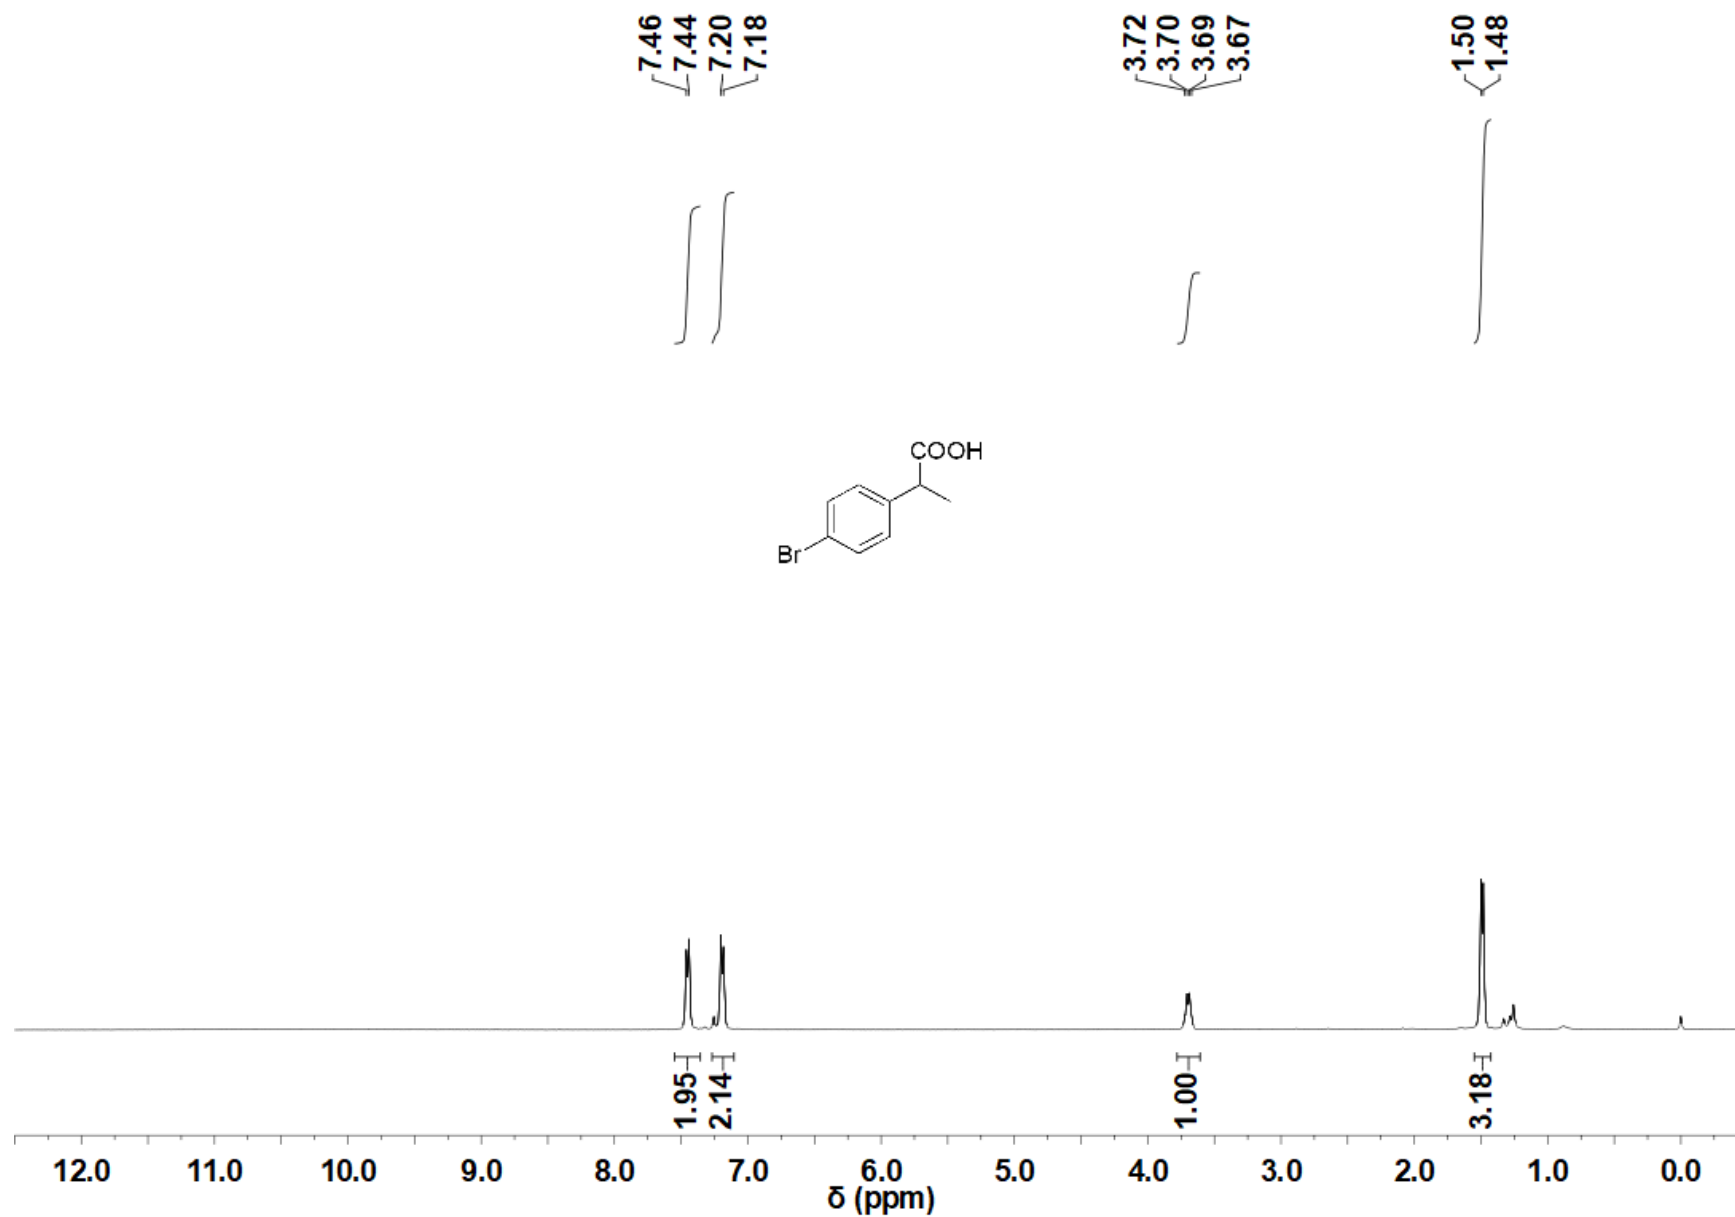

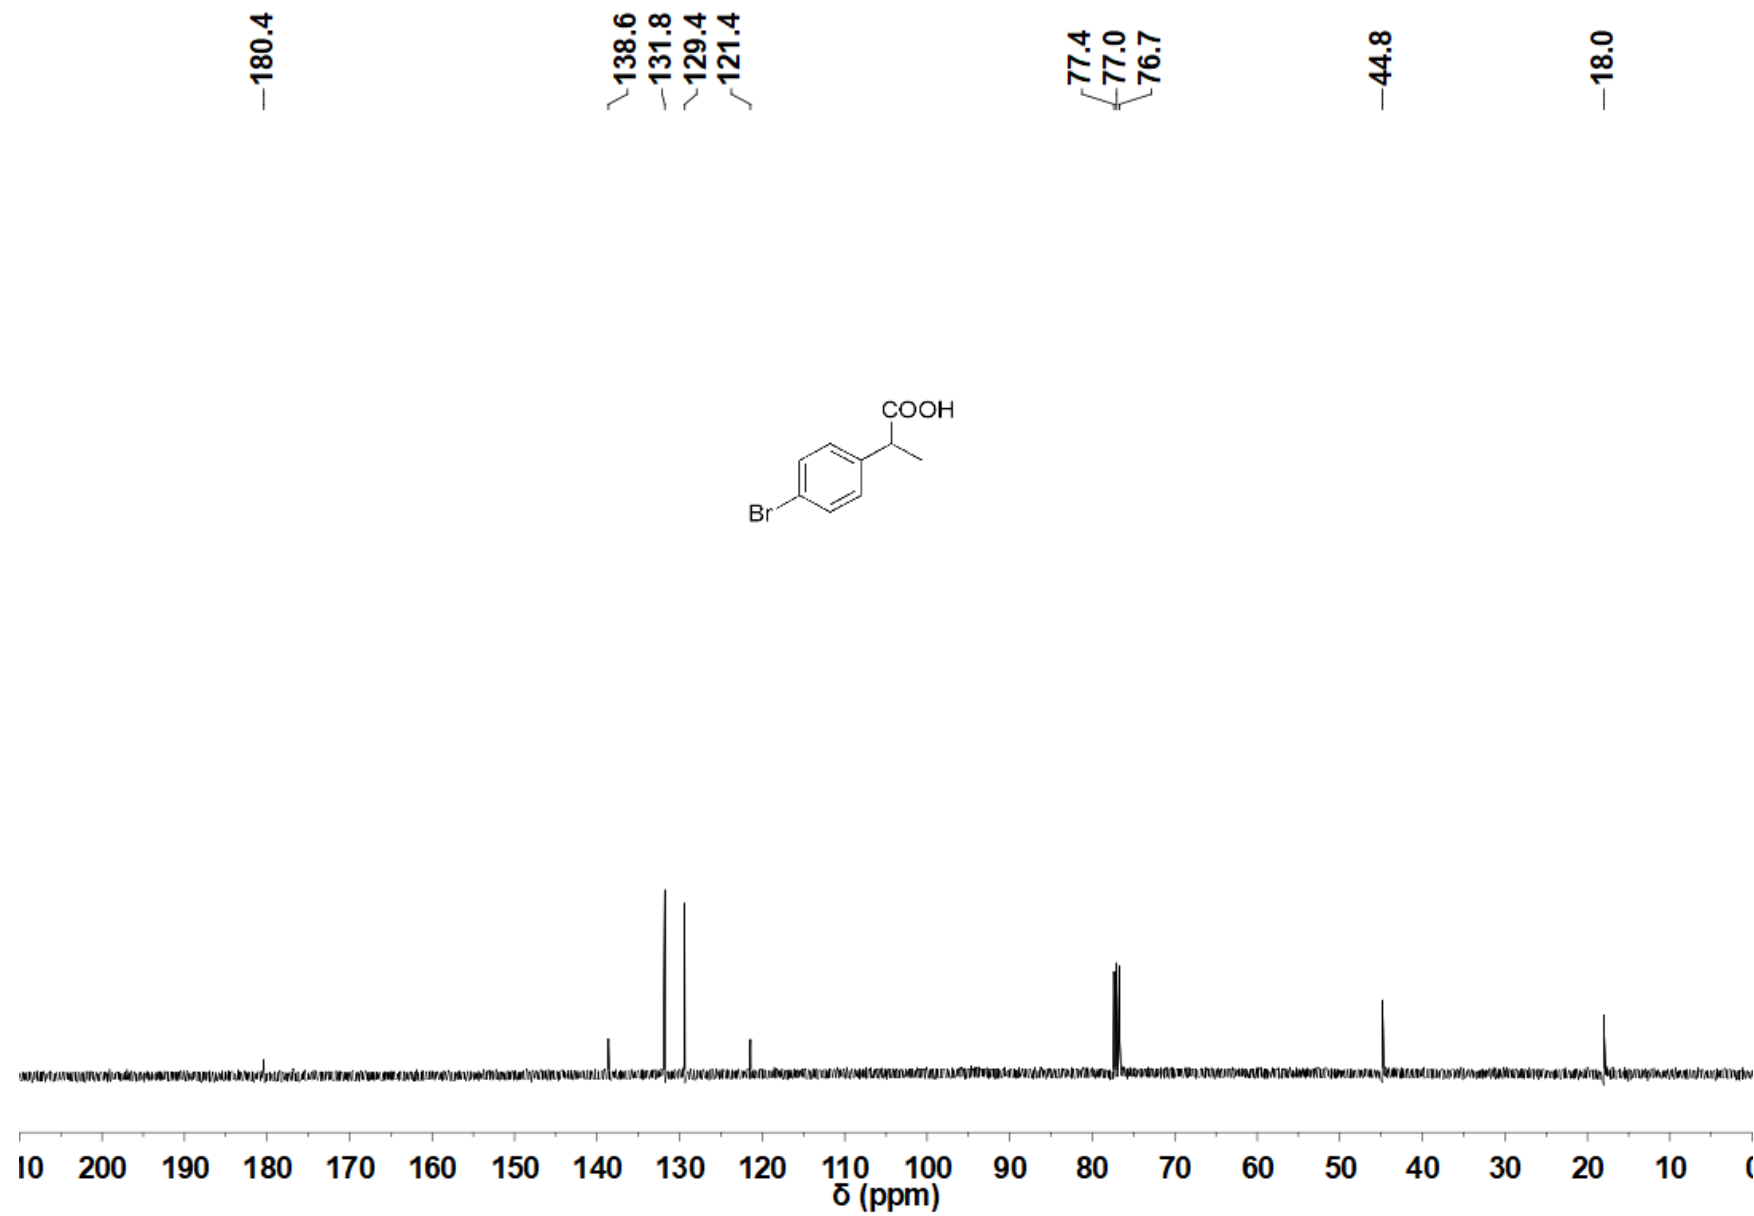

2-(4-cyanophenyl) propanoic acid, **2h**  
400 MHz, CDCl<sub>3</sub>

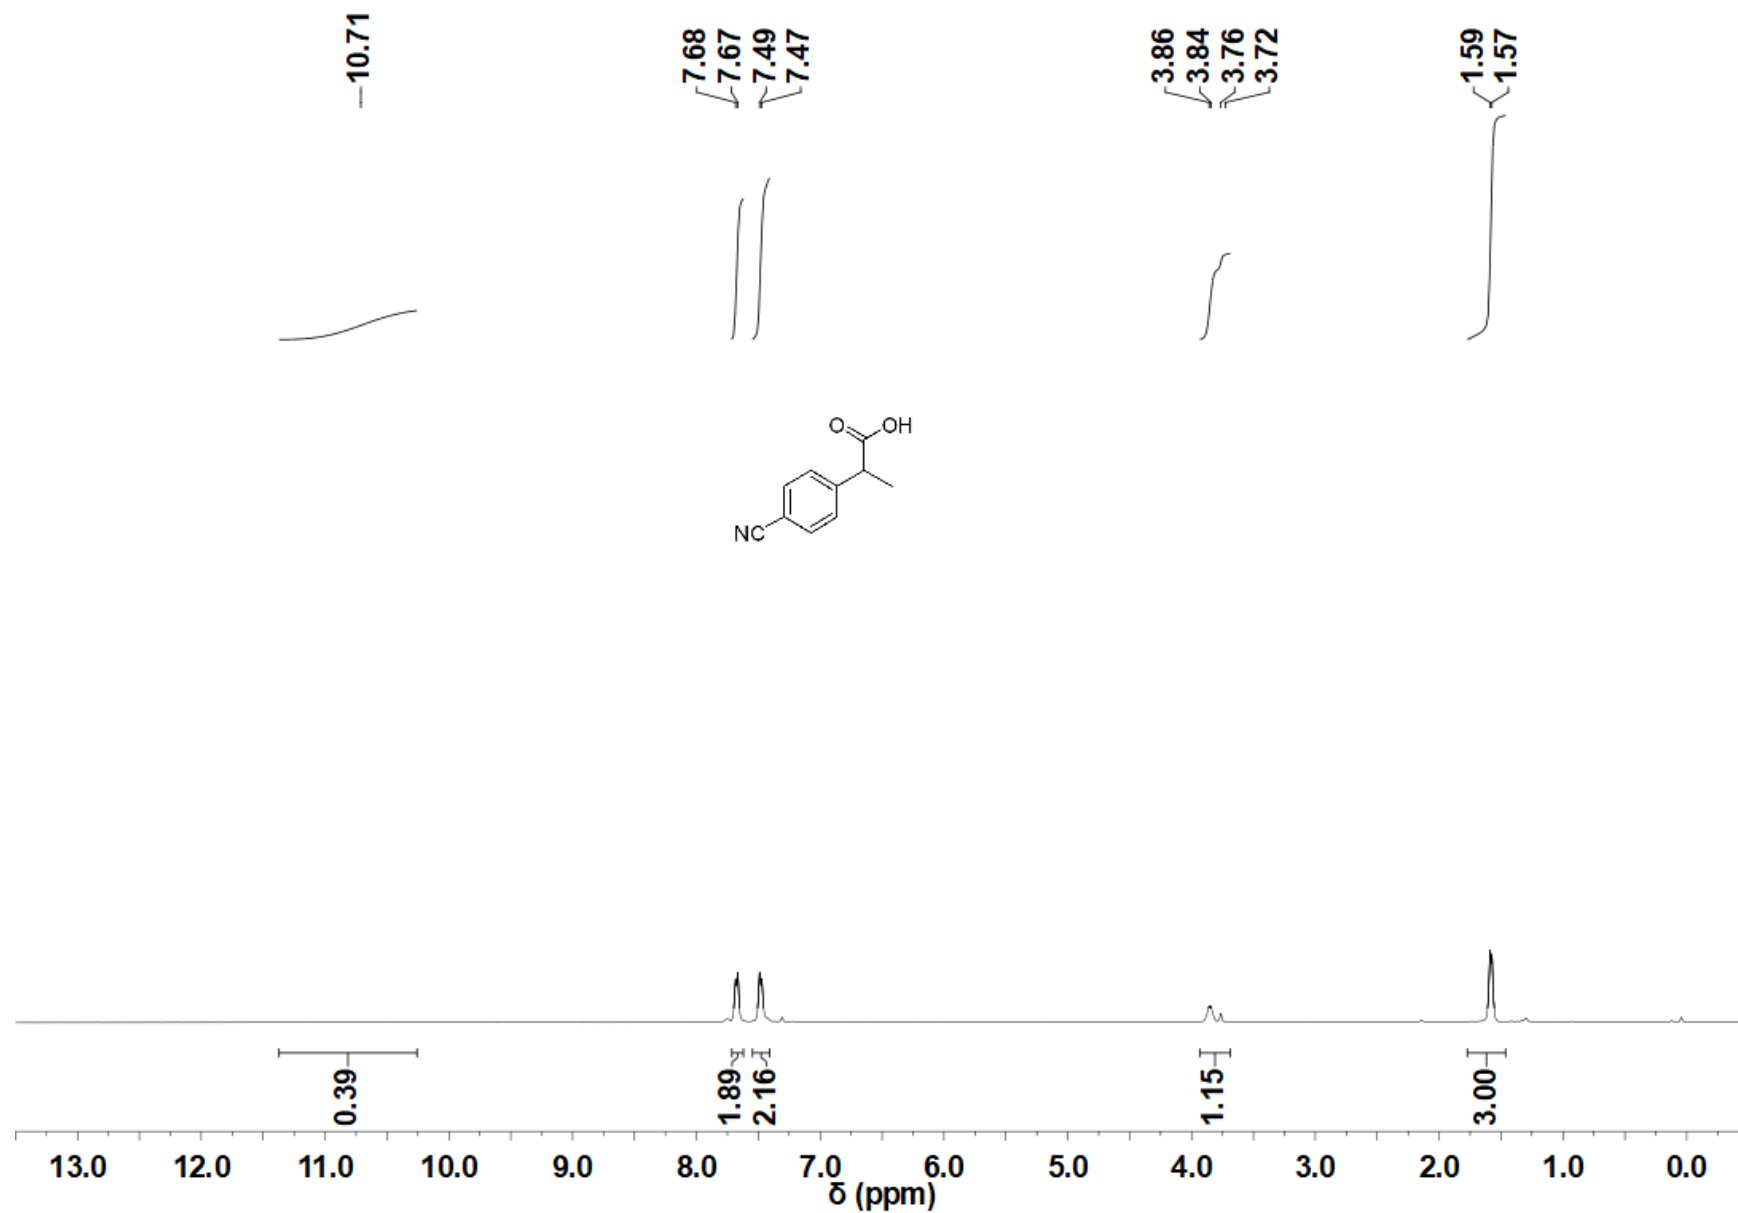

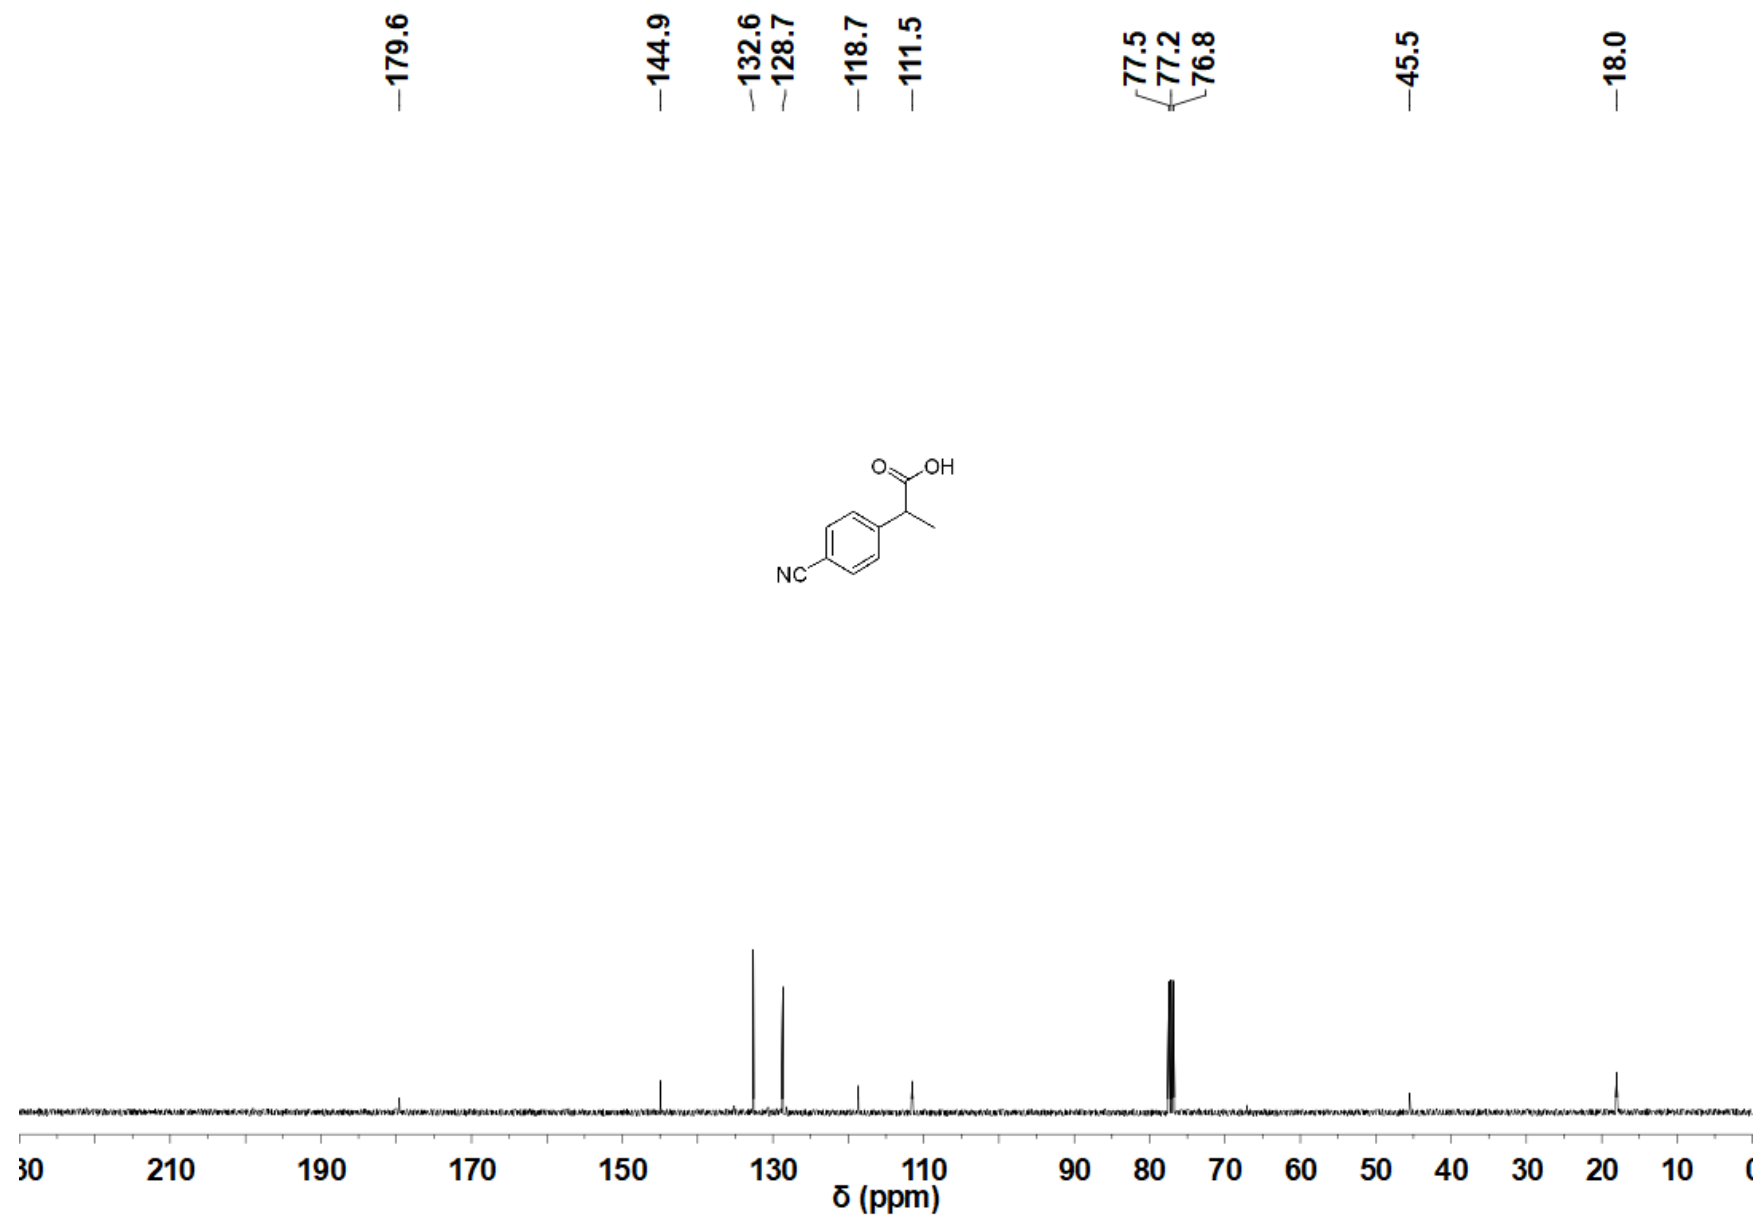

2-(4-(trifluoromethyl) phenyl) propanoic acid, **2i**  
400 MHz, CDCl<sub>3</sub>

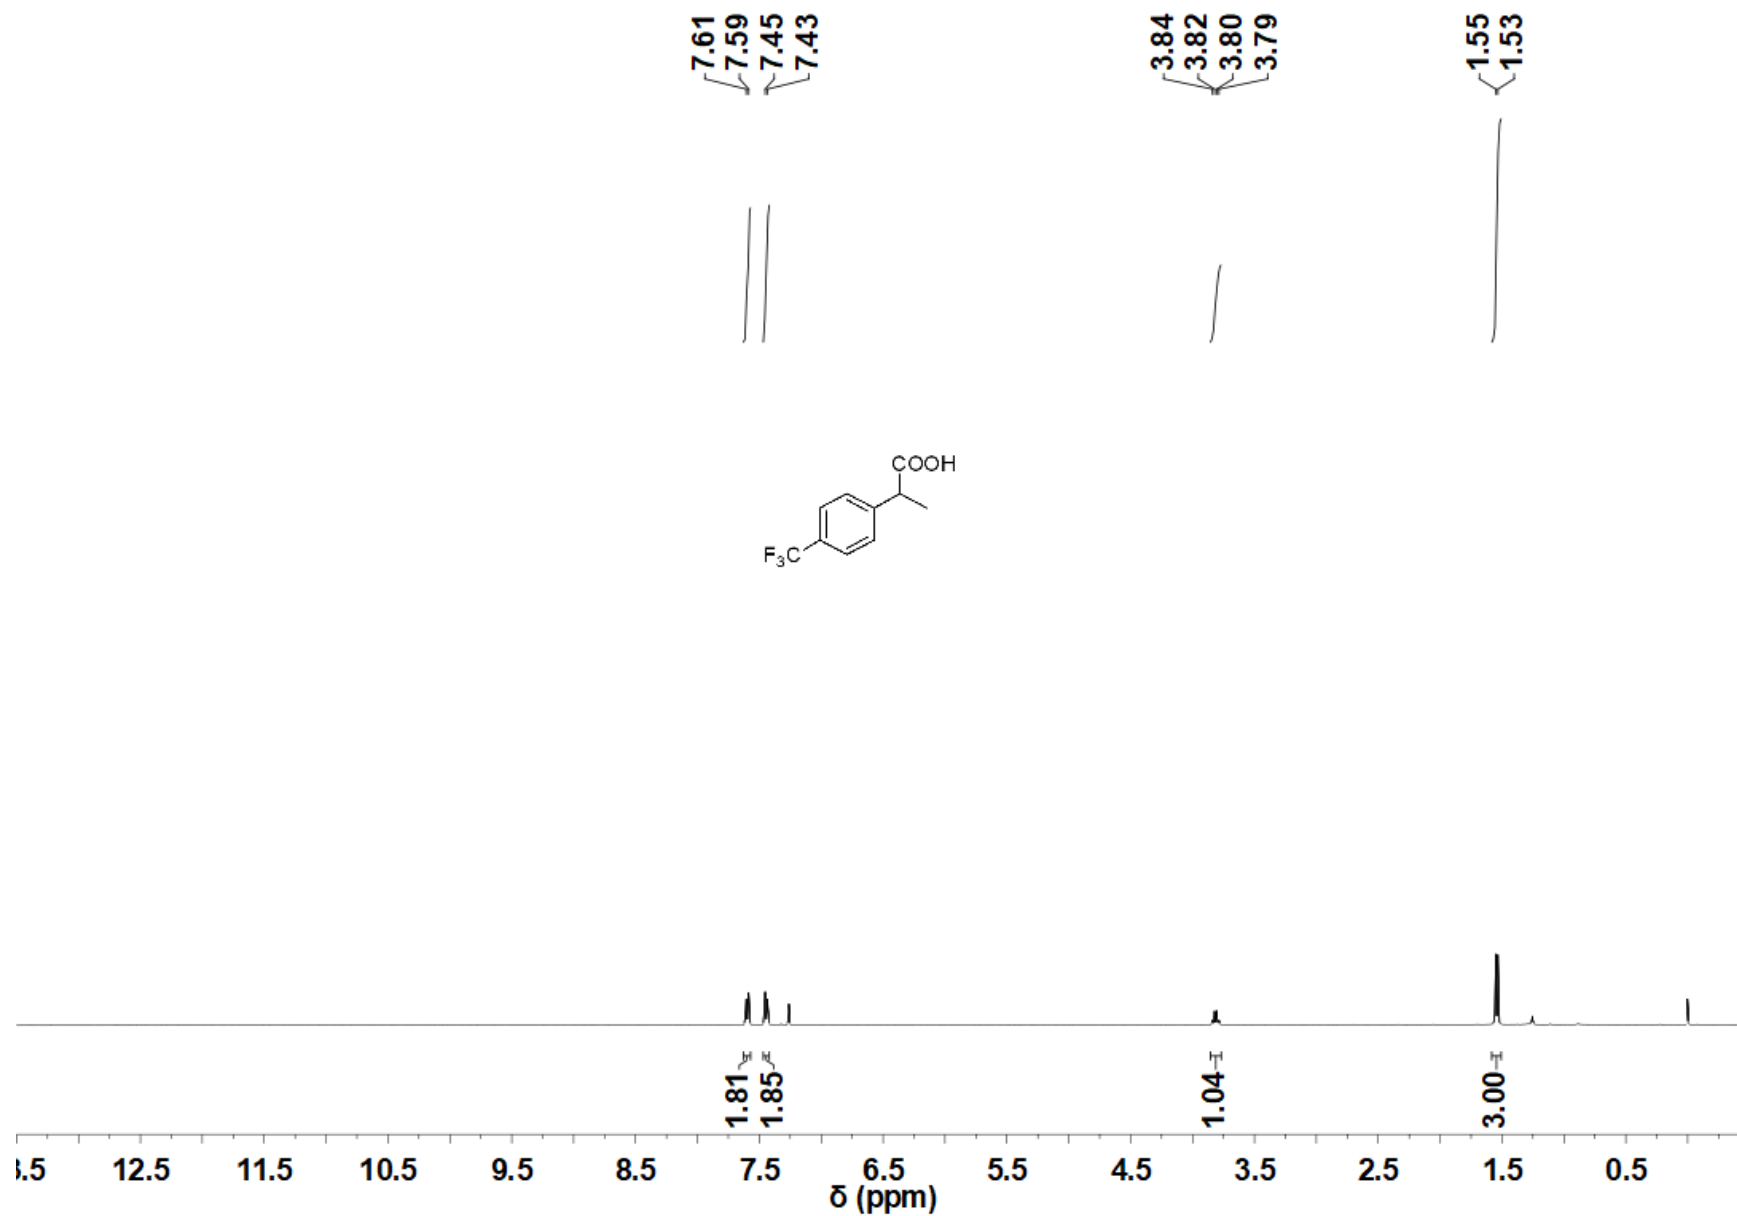



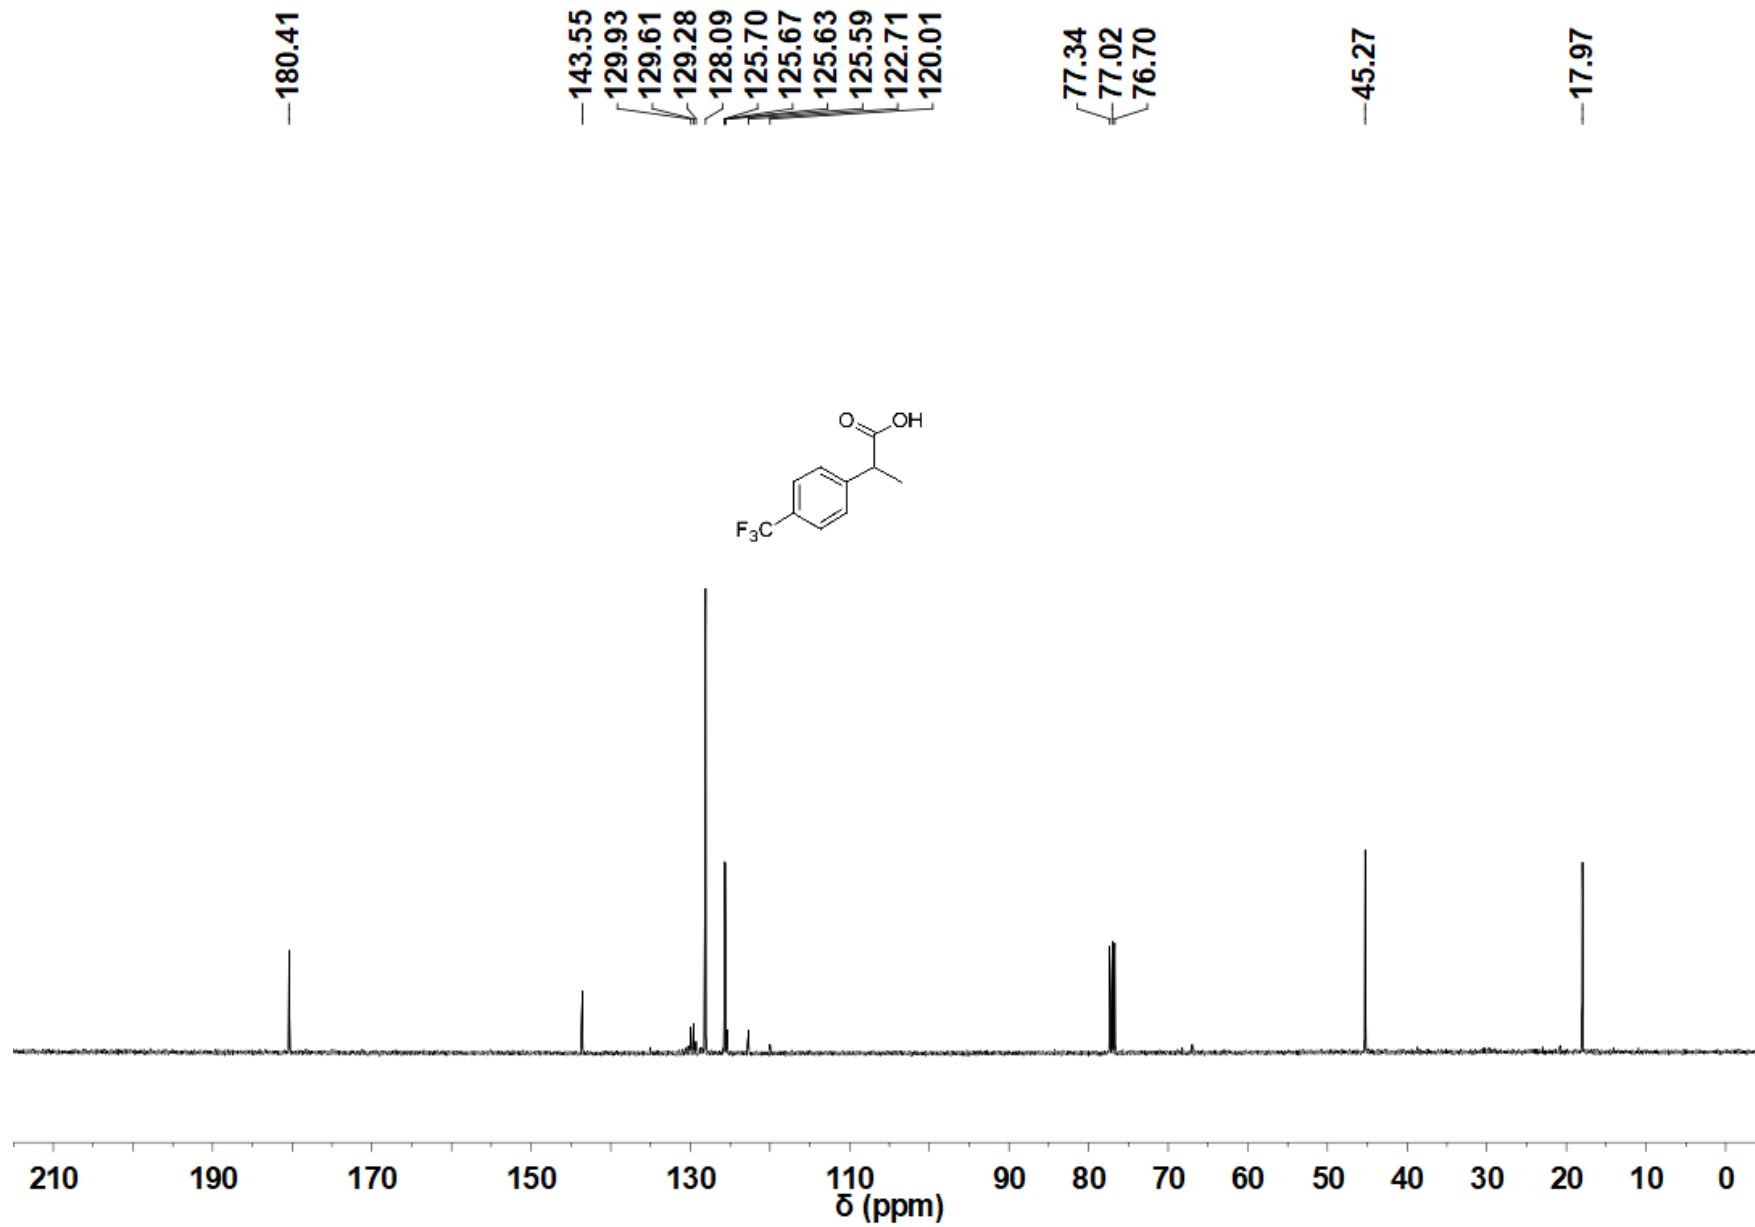

2-phenylpropanoic acid, **2j**  
400 MHz, DMSO-*d*<sub>6</sub>

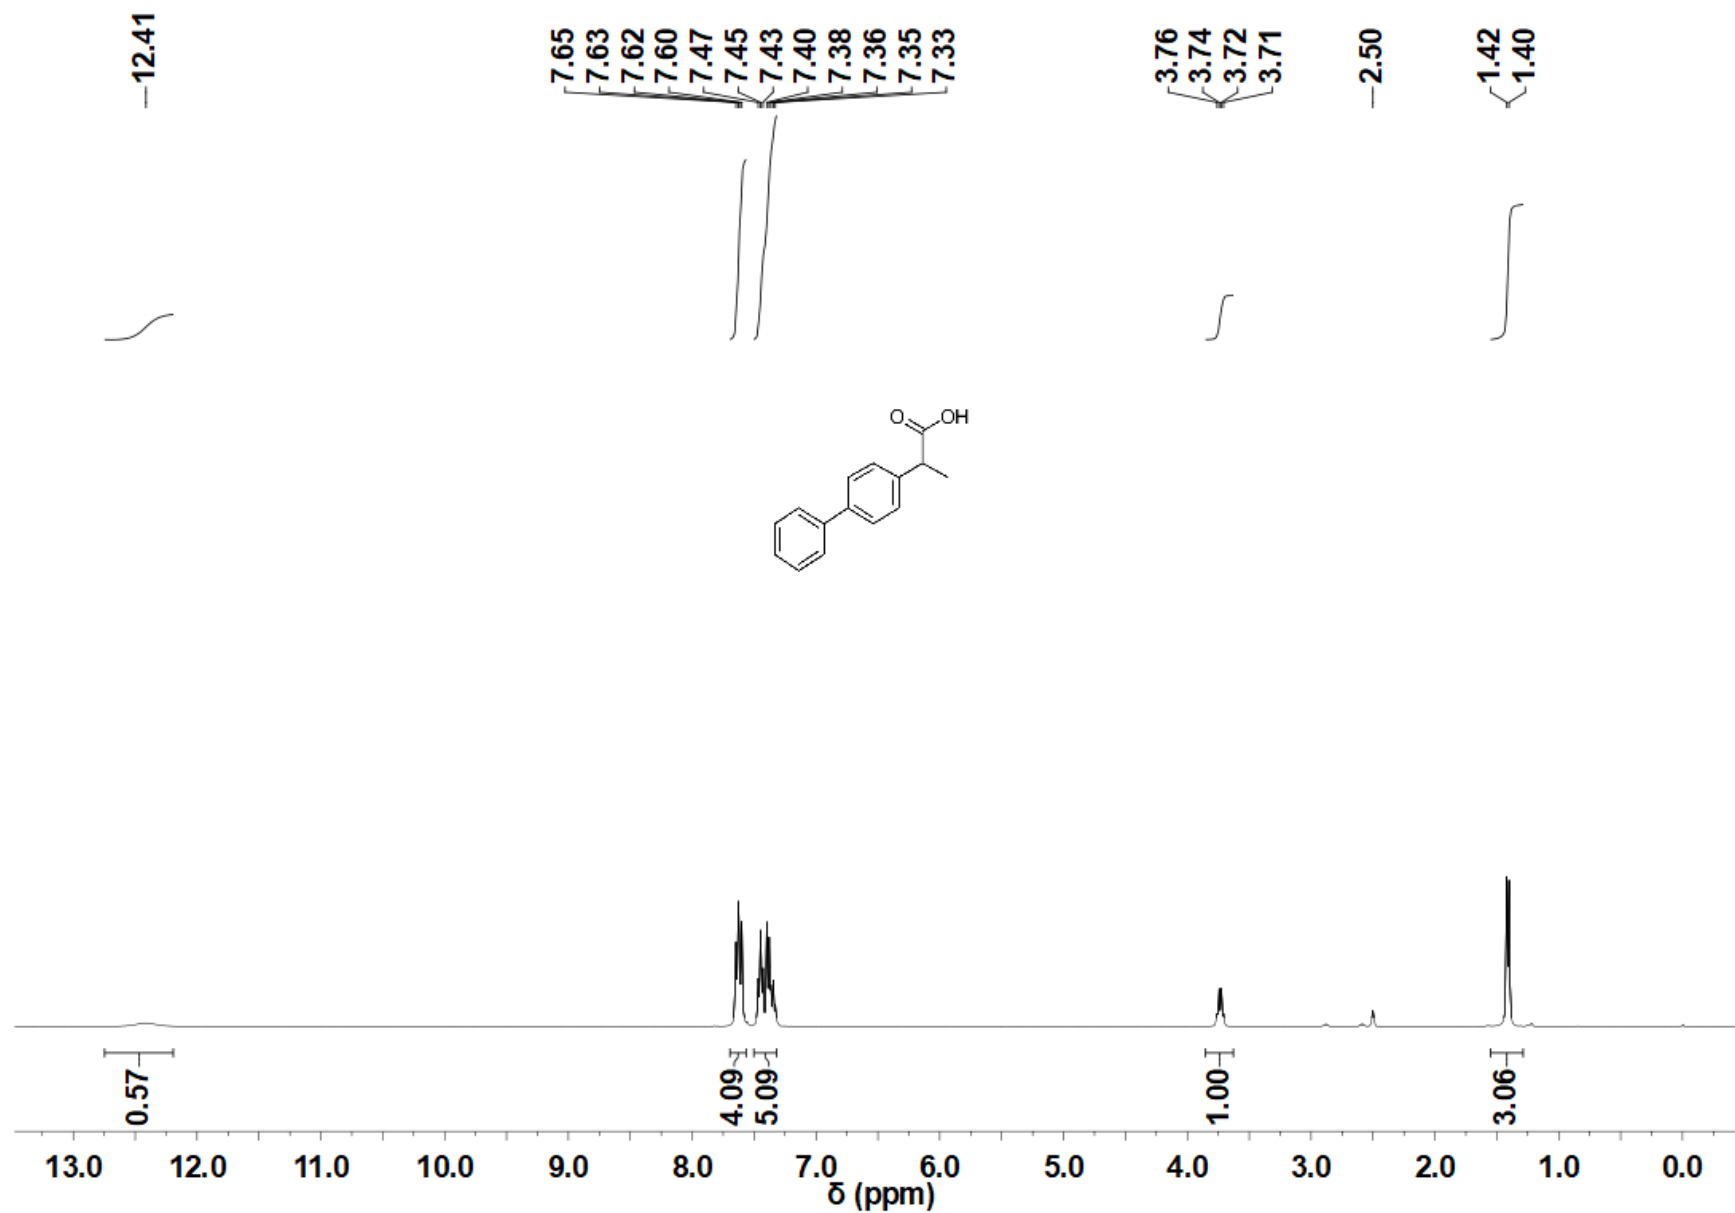

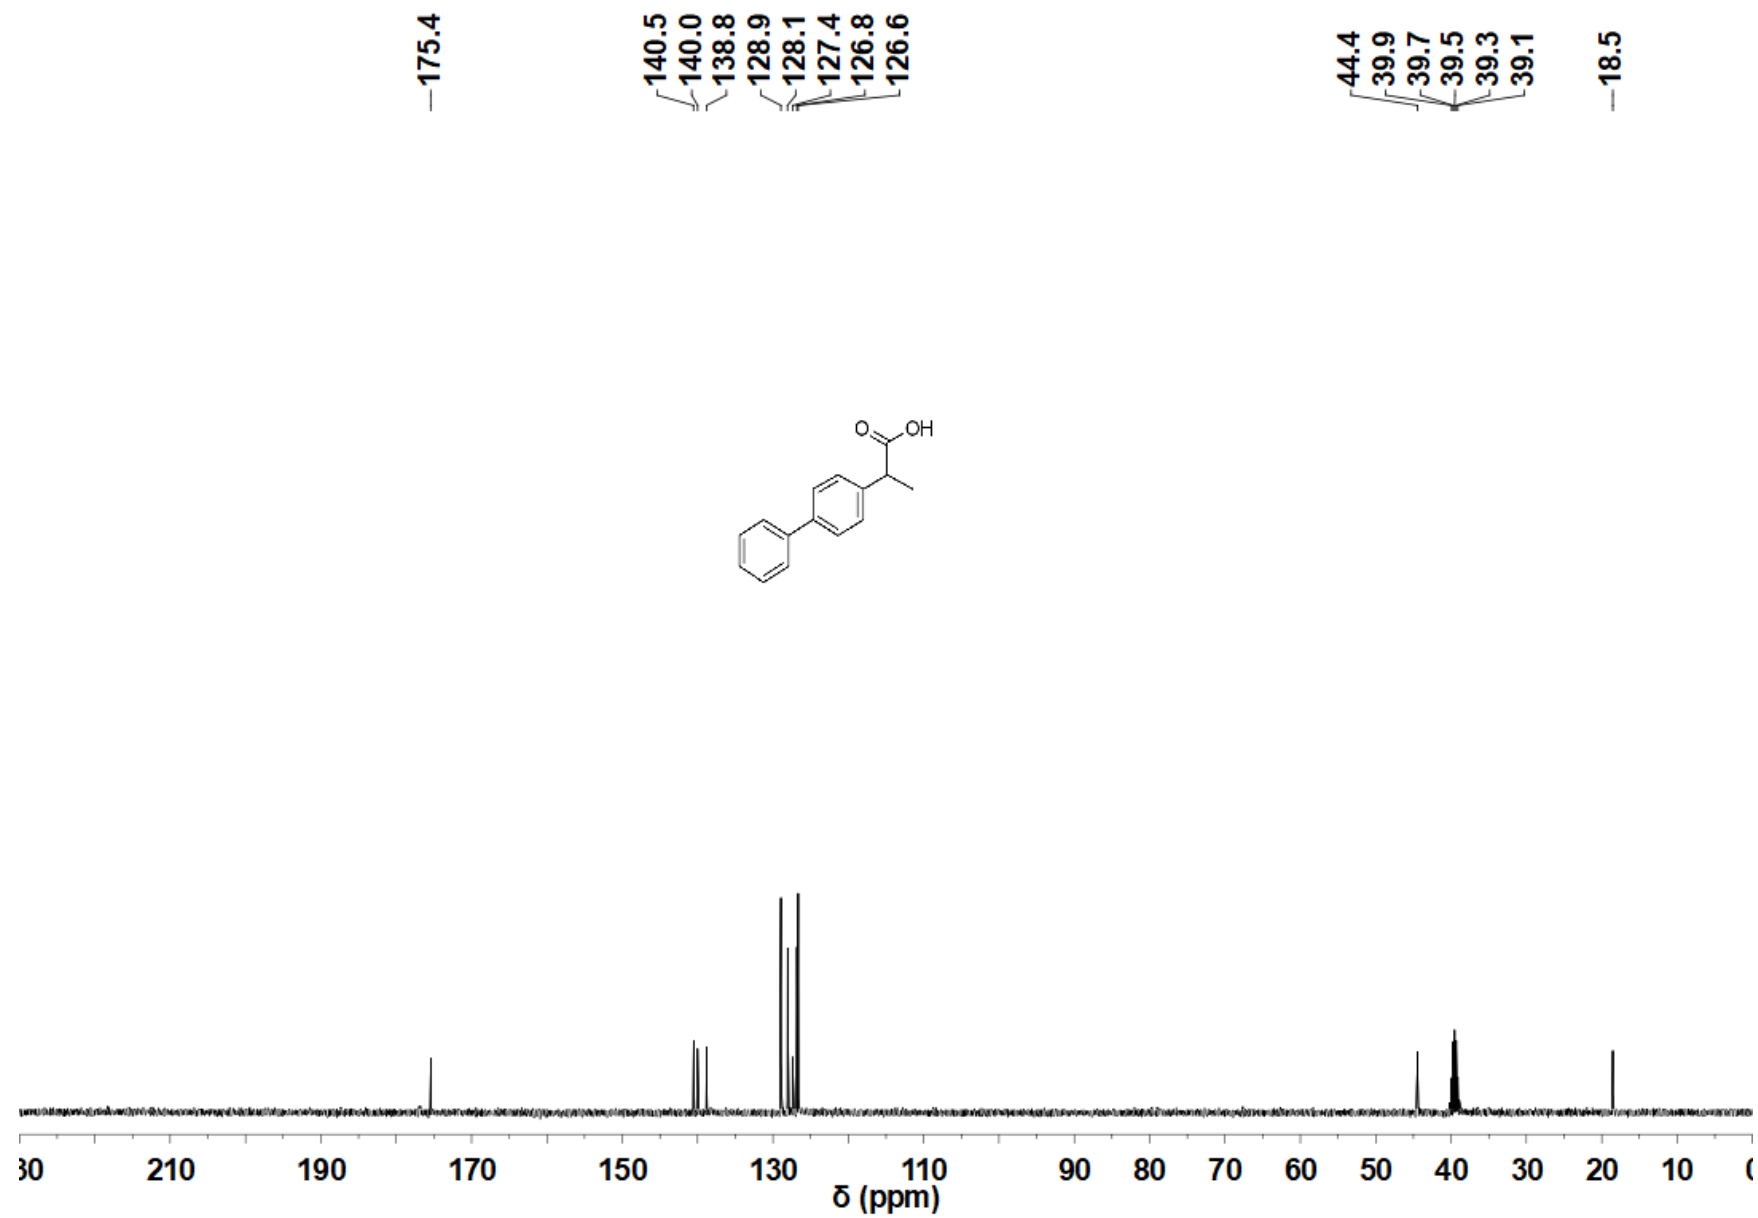

2-(4-carboxyphenyl) propionic acid, **2k**  
400 MHz, DMSO-*d*<sub>6</sub>

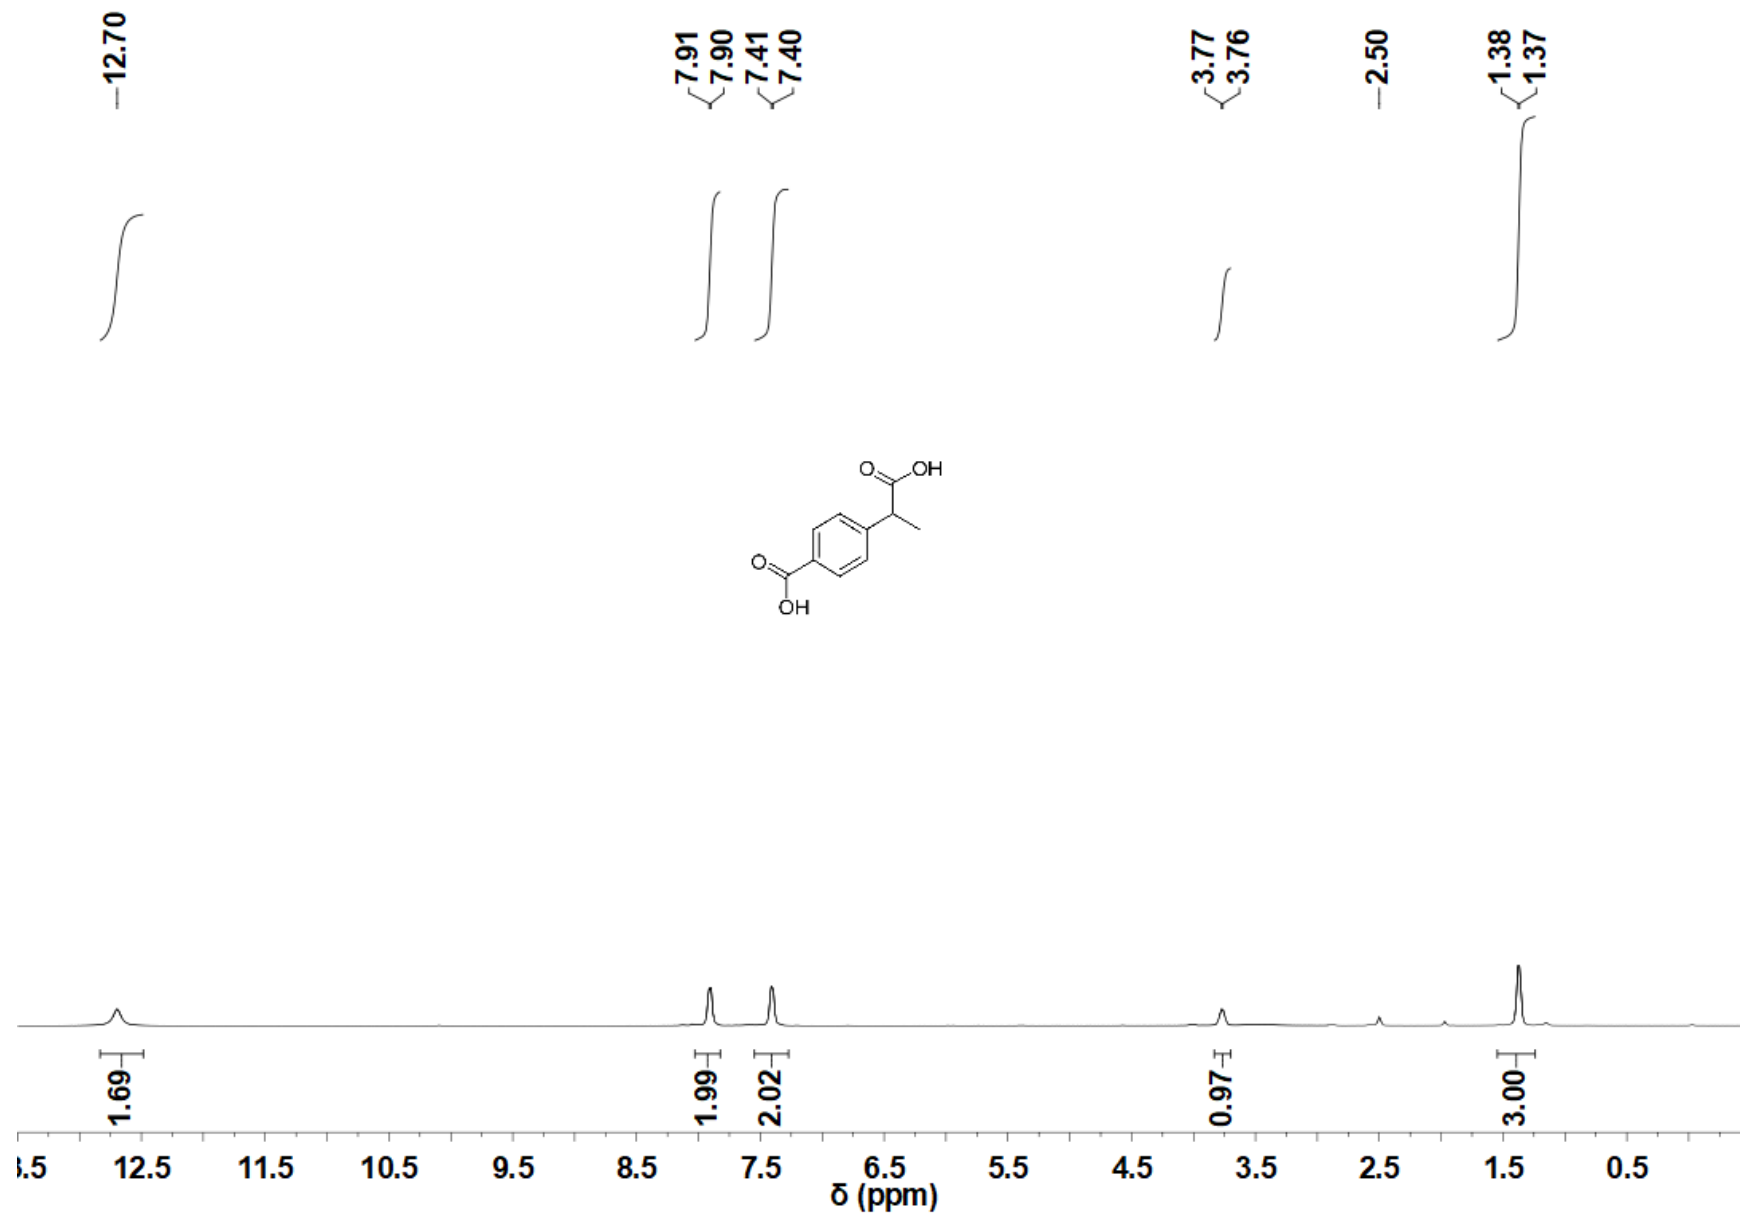

-175.0  
-167.3  
-146.4  
129.7  
129.5  
127.8  
44.8  
40.2  
39.9  
39.7  
39.5  
39.3  
39.1  
38.9  
-18.4

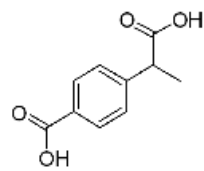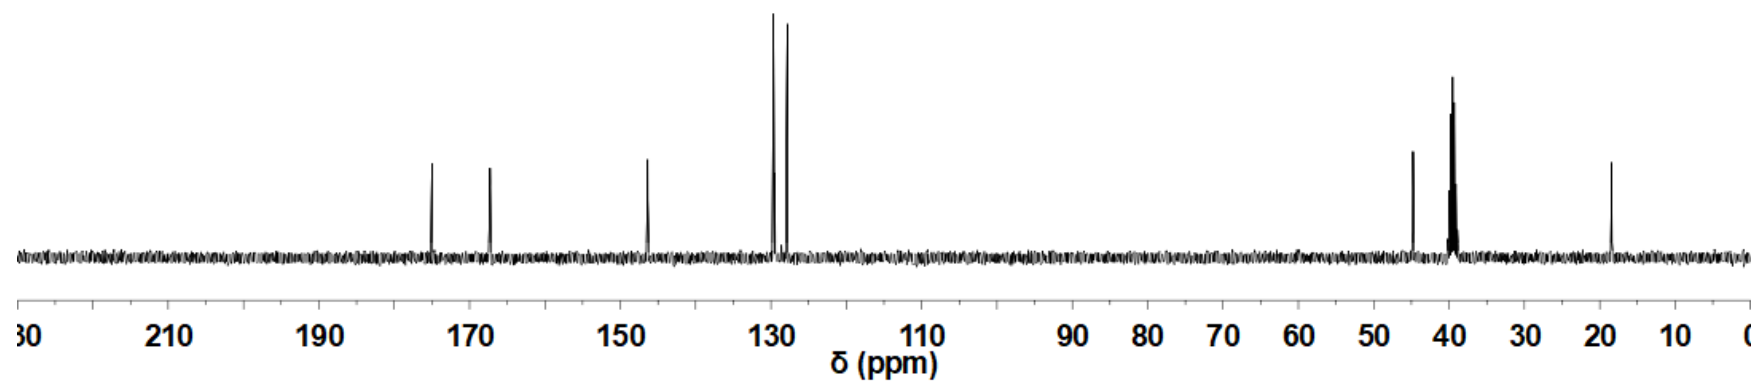

2-(4-isobutylphenyl) propionic acid, **21**  
400 MHz, CDCl<sub>3</sub>

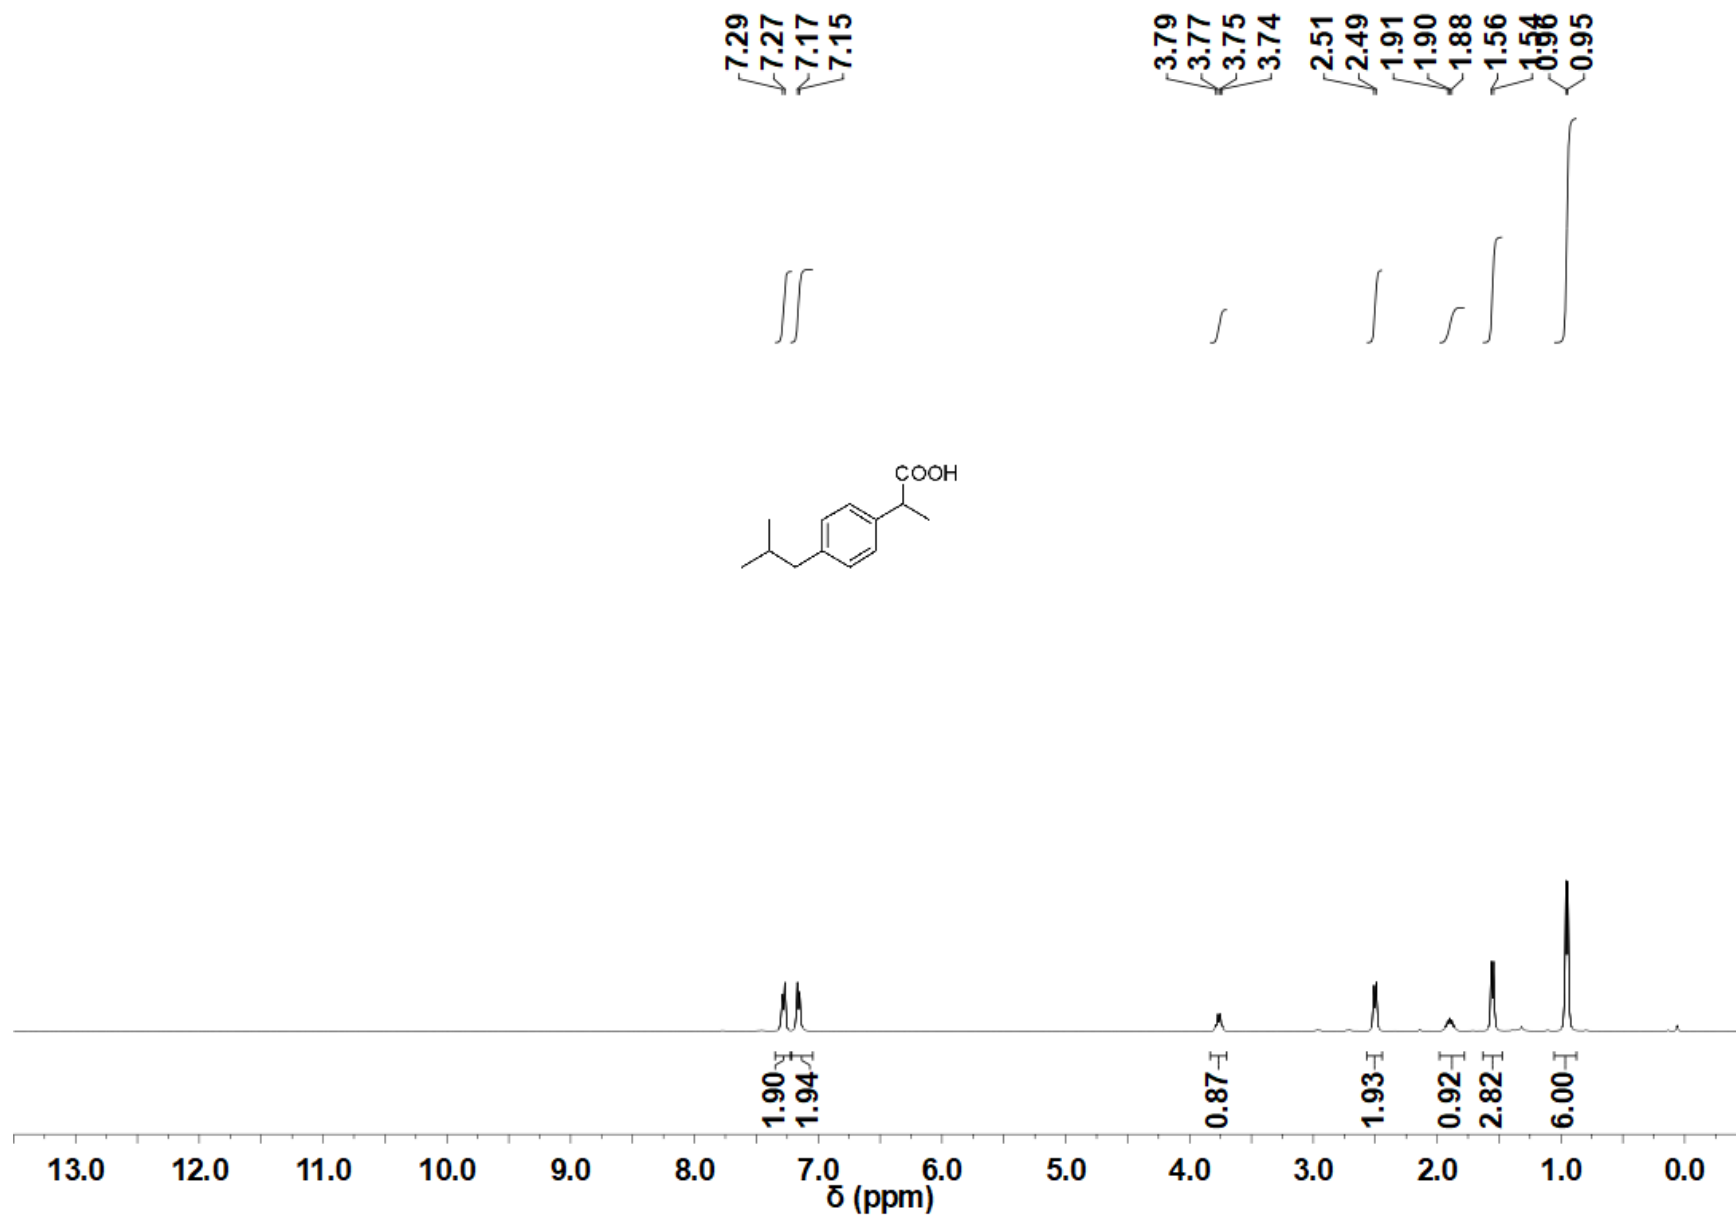

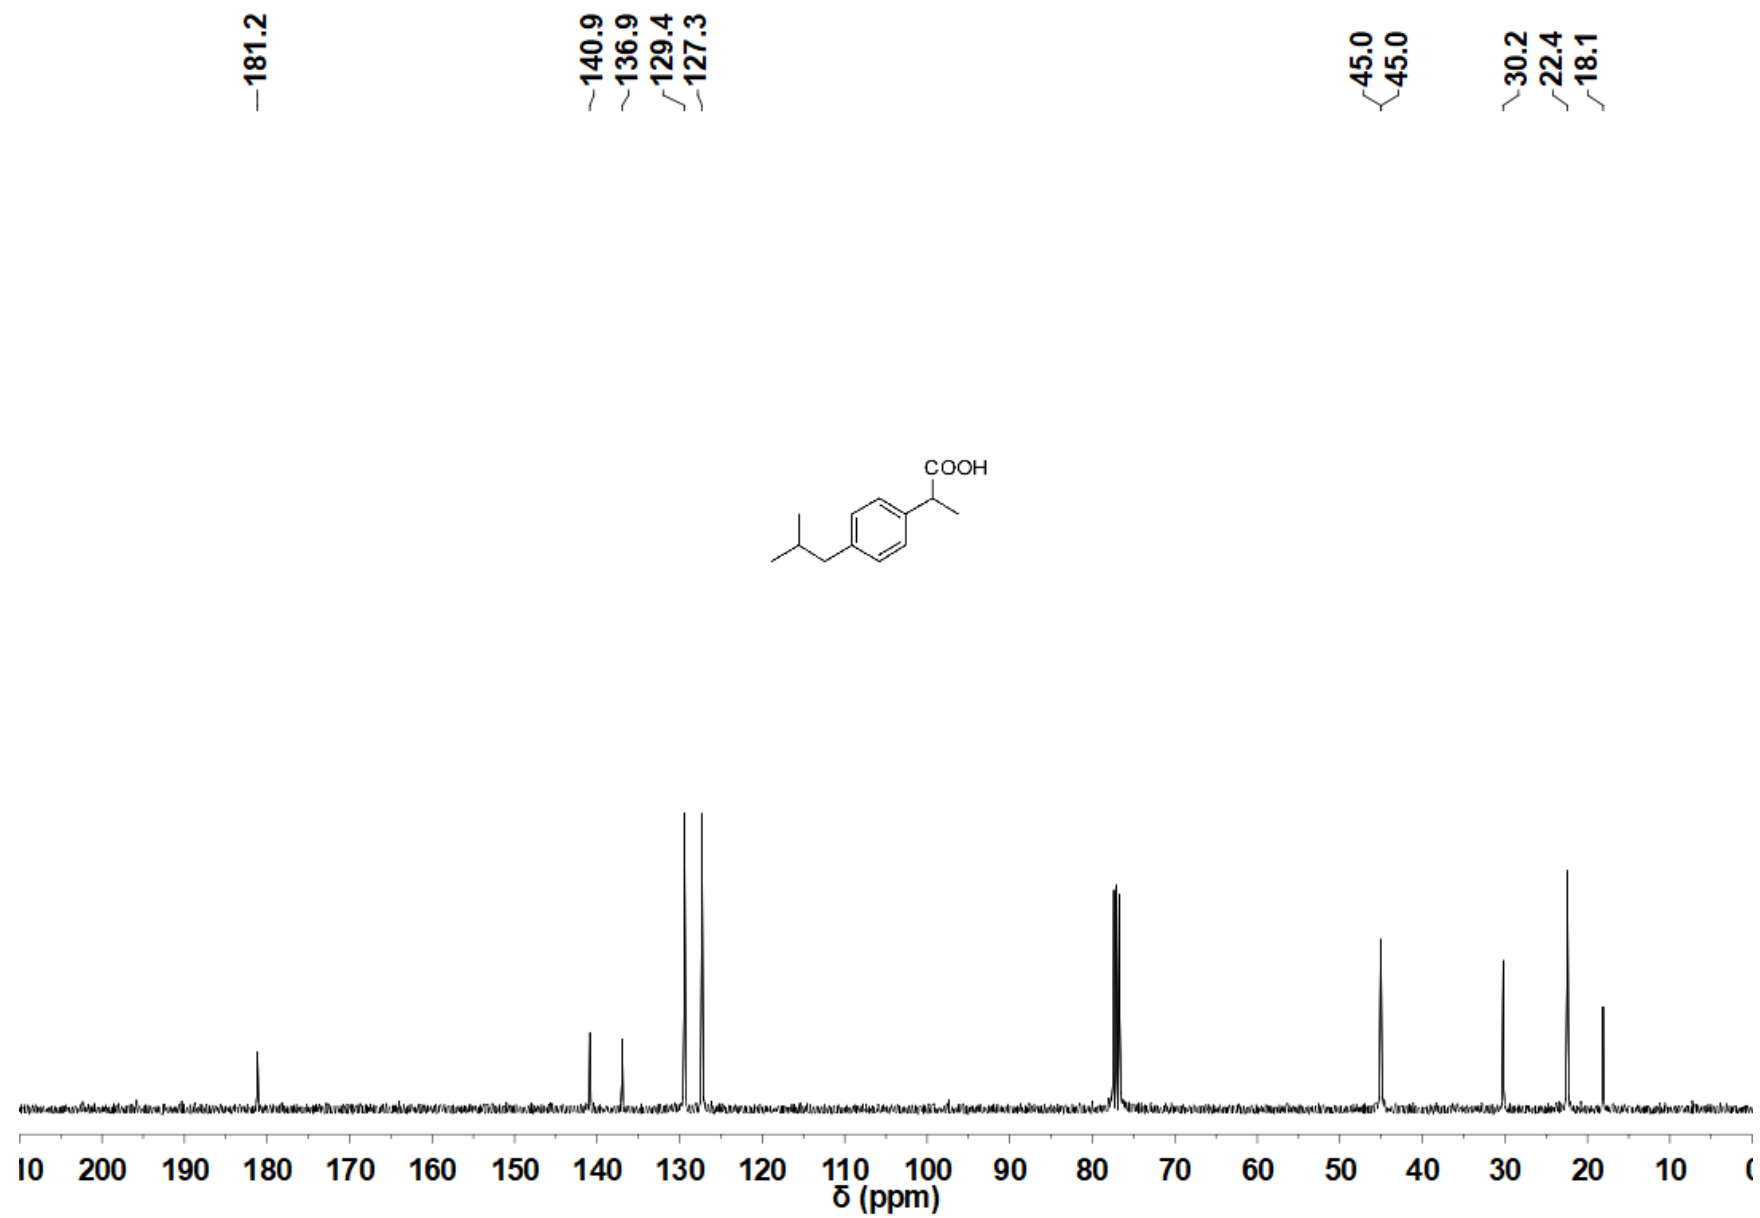

# Qualitative Compound Report

|                        |                       |                               |            |
|------------------------|-----------------------|-------------------------------|------------|
| <b>Data File</b>       | HZJ-4-16-4+.d         | <b>Sample Name</b>            | HZJ-4-16-4 |
| <b>Sample Type</b>     | Sample                | <b>Position</b>               | Vial 24    |
| <b>Instrument Name</b> | 6530 QTOF LC/MS       | <b>Acq Method</b>             | my-MS.m    |
| <b>Acquired Time</b>   | 5/18/2017 10:44:22 AM | <b>IRM Calibration Status</b> | Success    |

## Compound Table

| Compound Label | RT    | Mass     | Abund | Formula    | Tgt Mass | Diff (ppm) |
|----------------|-------|----------|-------|------------|----------|------------|
| Cpd 1: 0.167   | 0.167 | 206.1306 | 35544 | C13 H18 O2 | 206.1307 | -0.41      |

| Compound Label | m/z      | RT    | Algorithm       | Mass     |
|----------------|----------|-------|-----------------|----------|
| Cpd 1: 0.167   | 205.1232 | 0.167 | Find By Formula | 206.1306 |

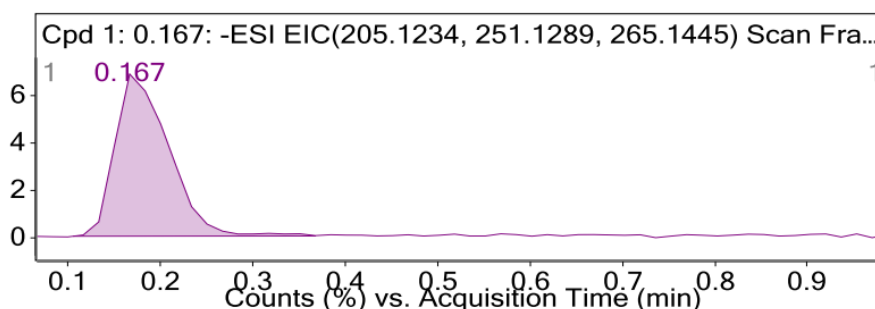

## MS Spectrum

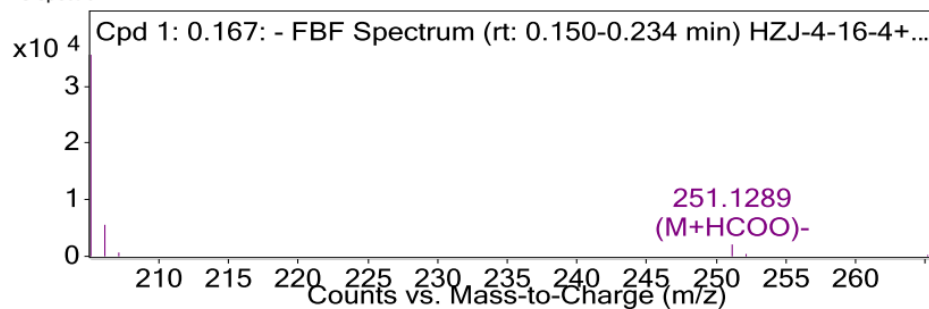

## MS Zoomed Spectrum

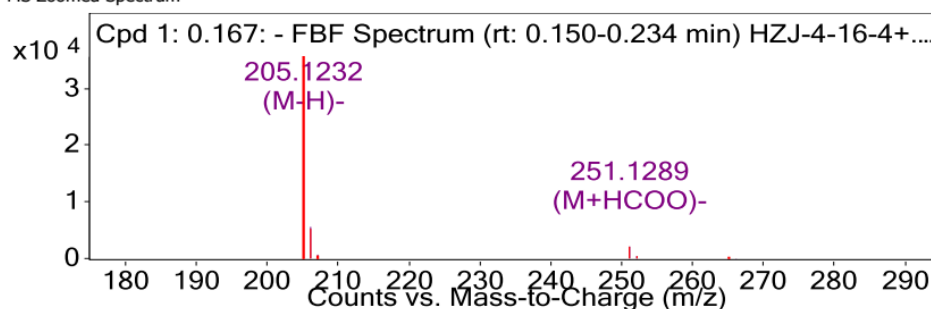



2-(3-methylphenyl) propanoic acid, **2m**  
400 MHz, CDCl<sub>3</sub>

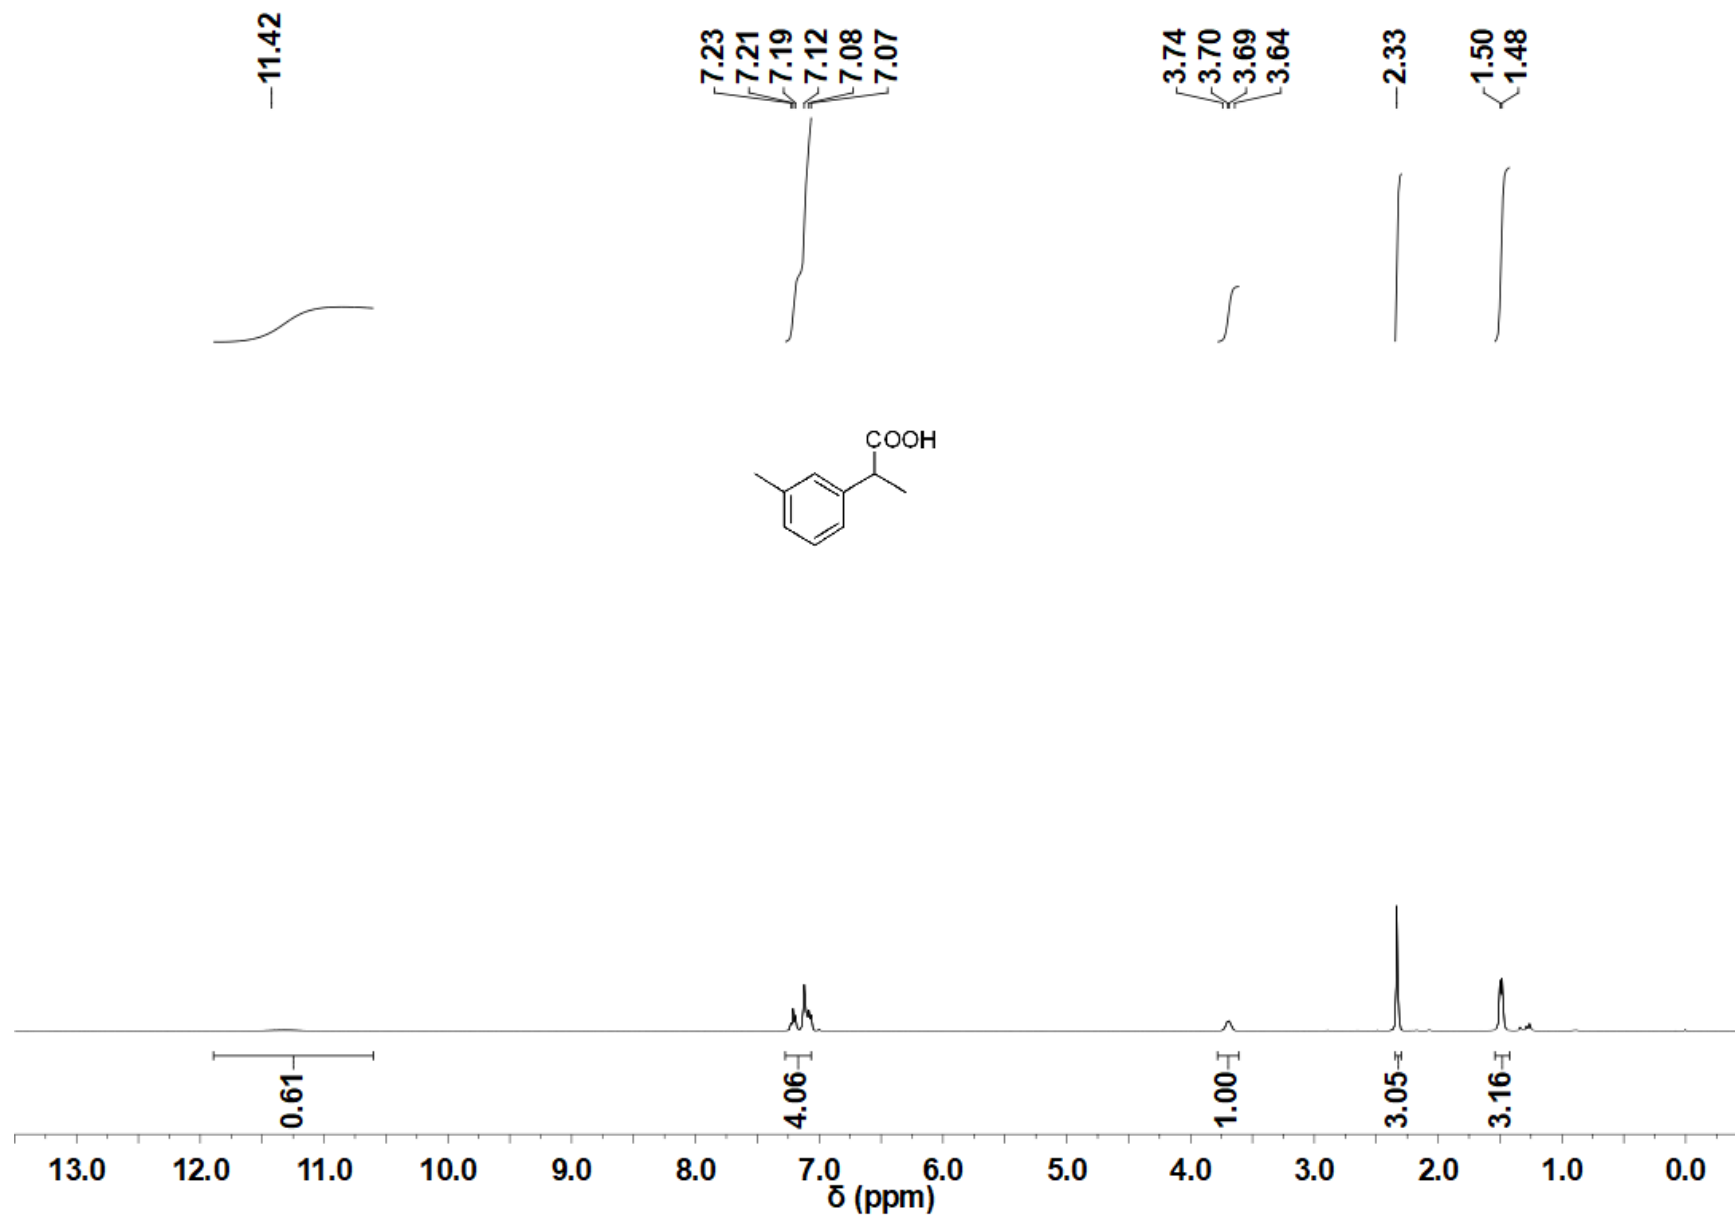

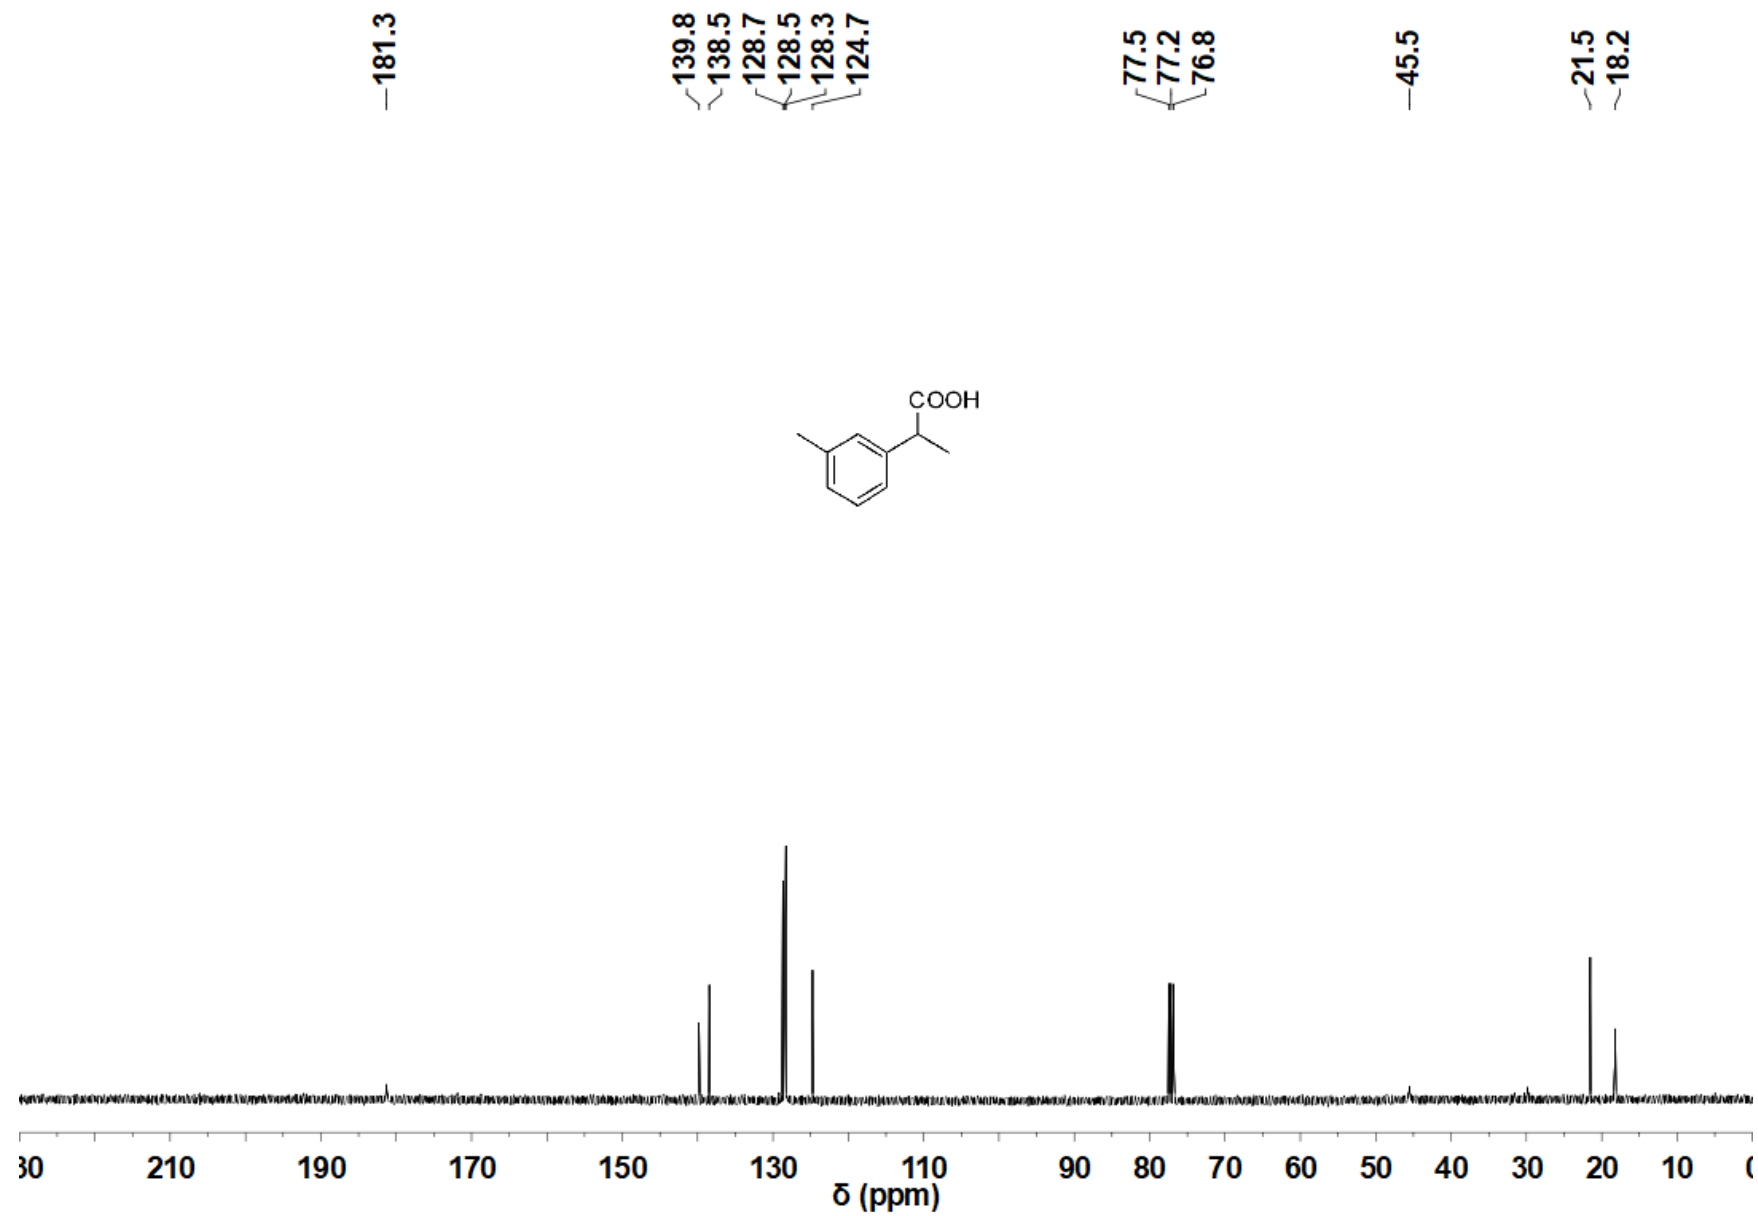

2-(3-methoxyphenyl) propanoic acid, **2n**  
400 MHz, CDCl<sub>3</sub>

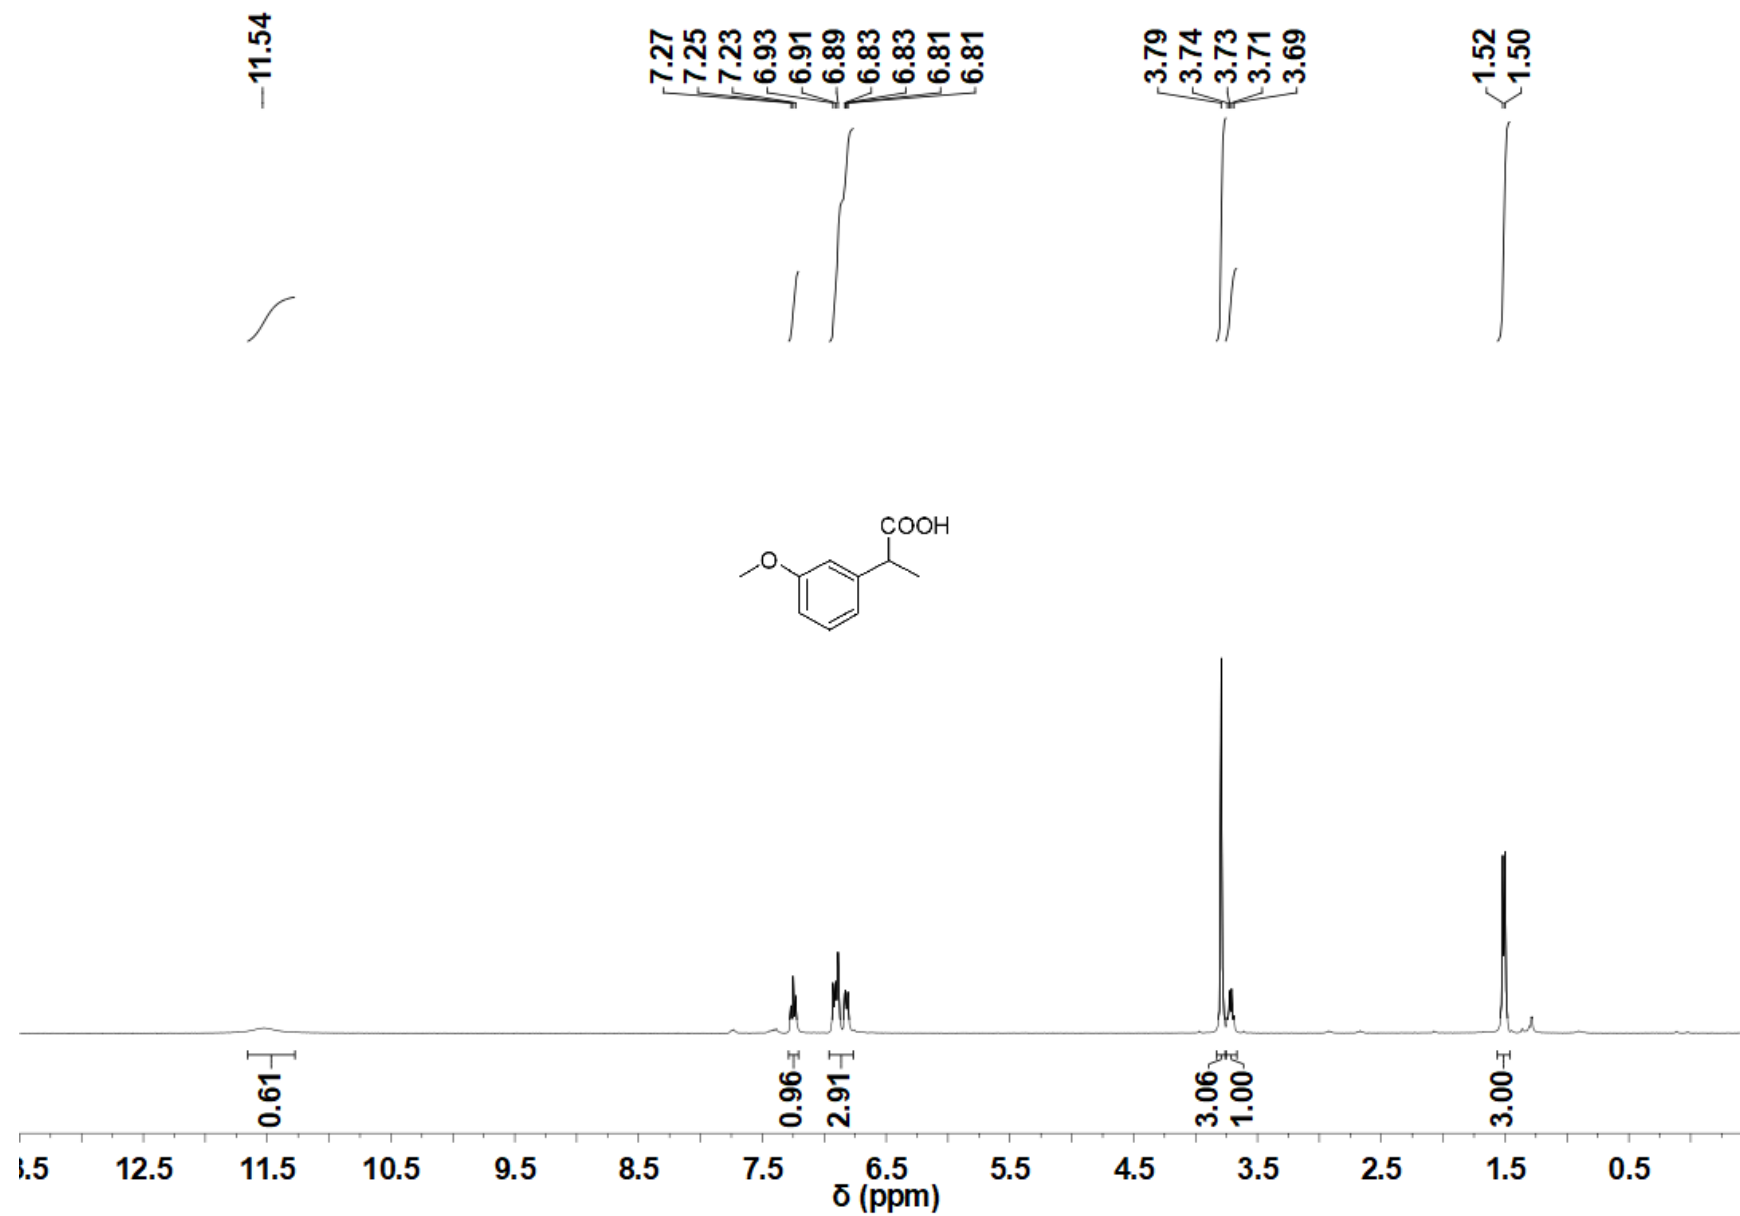

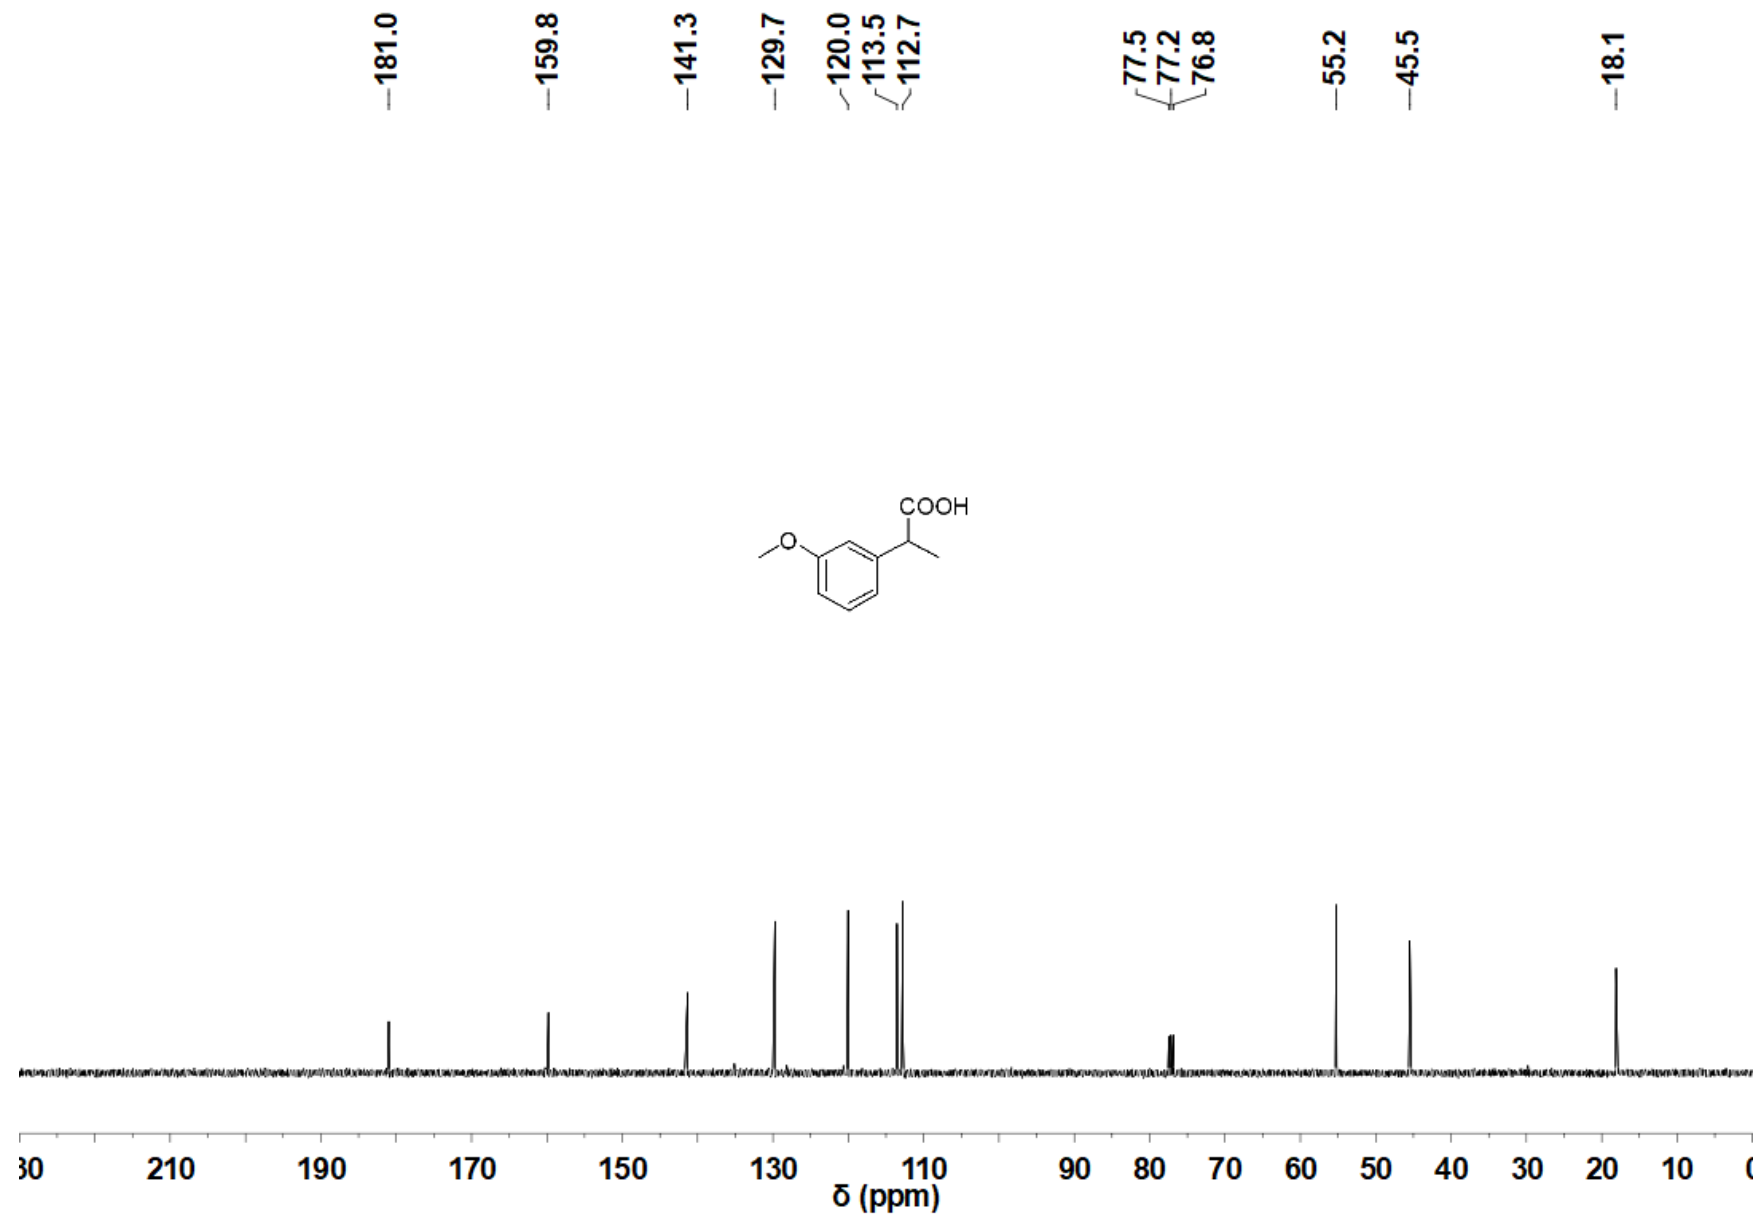

2-(2-naphthyl) propanoic acid, **2o**  
400 MHz, DMSO-*d*<sub>6</sub>

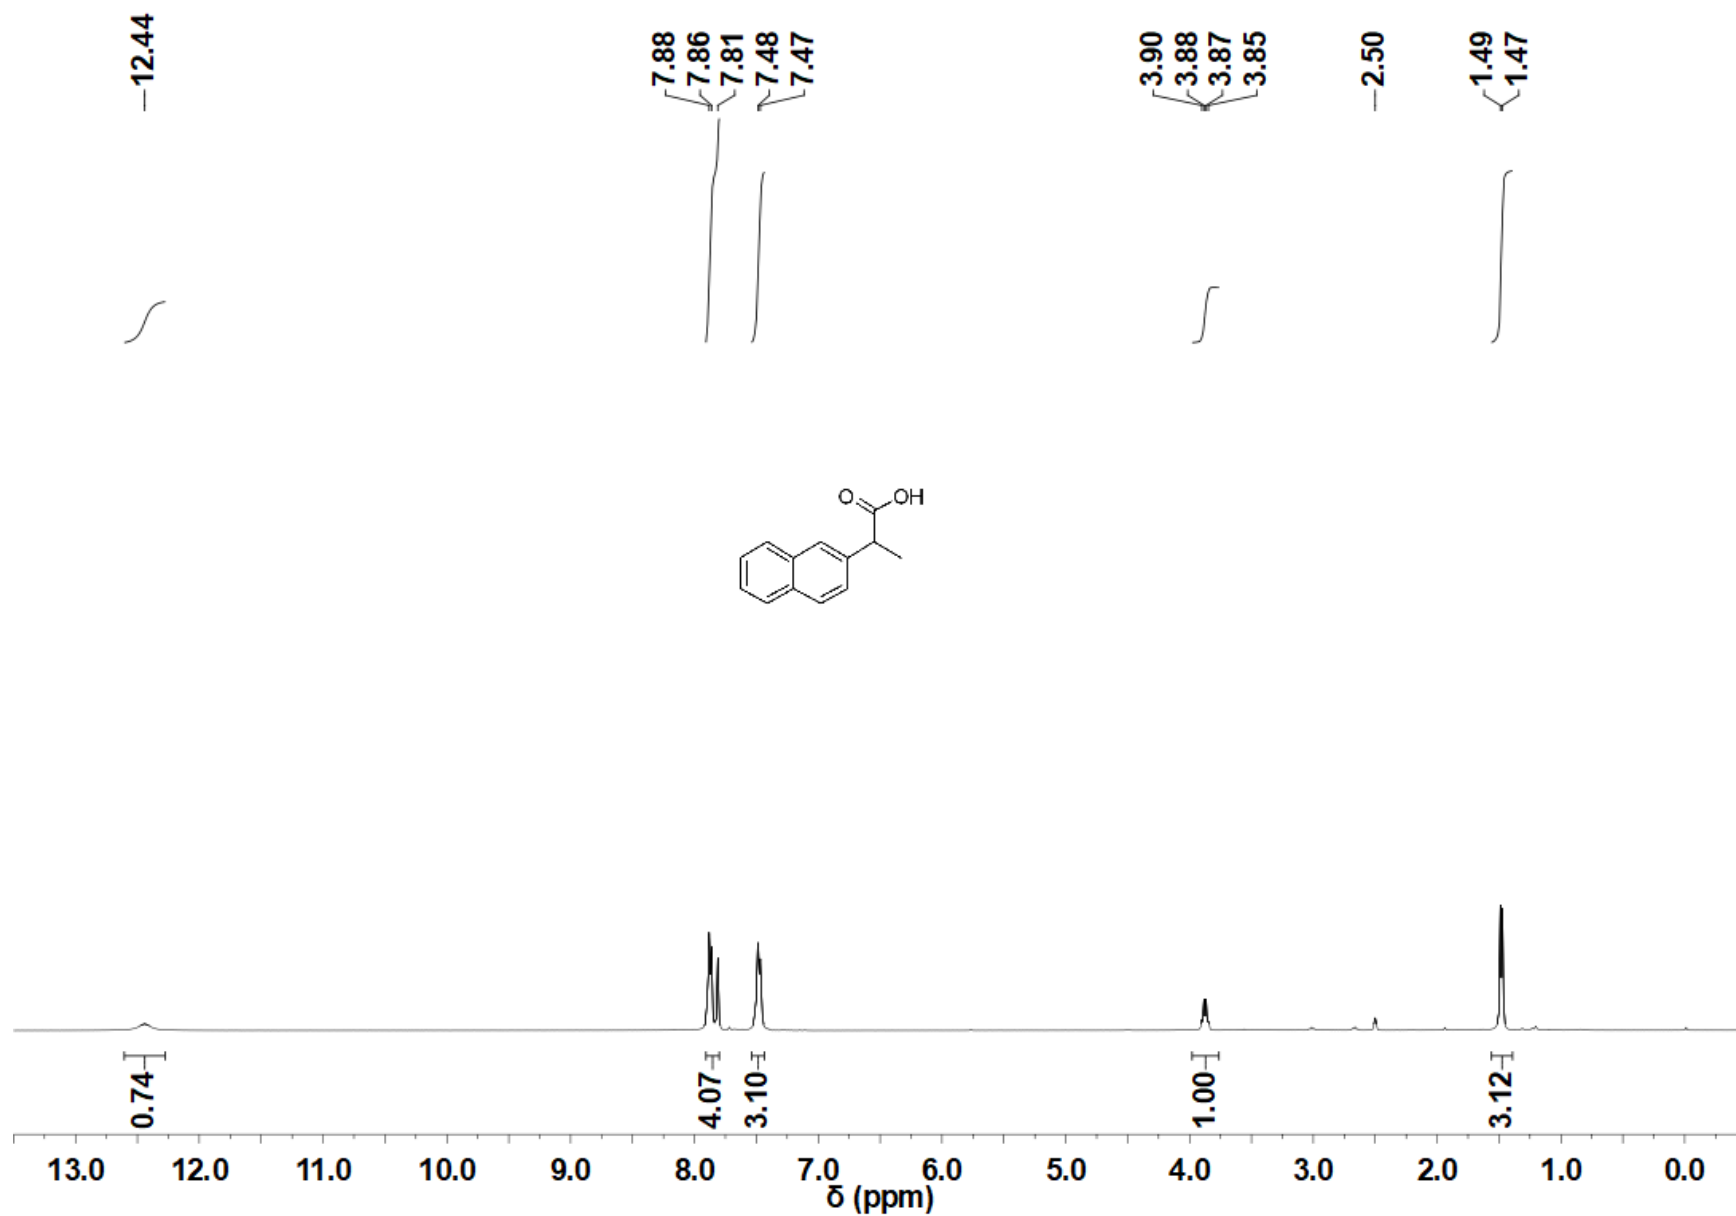

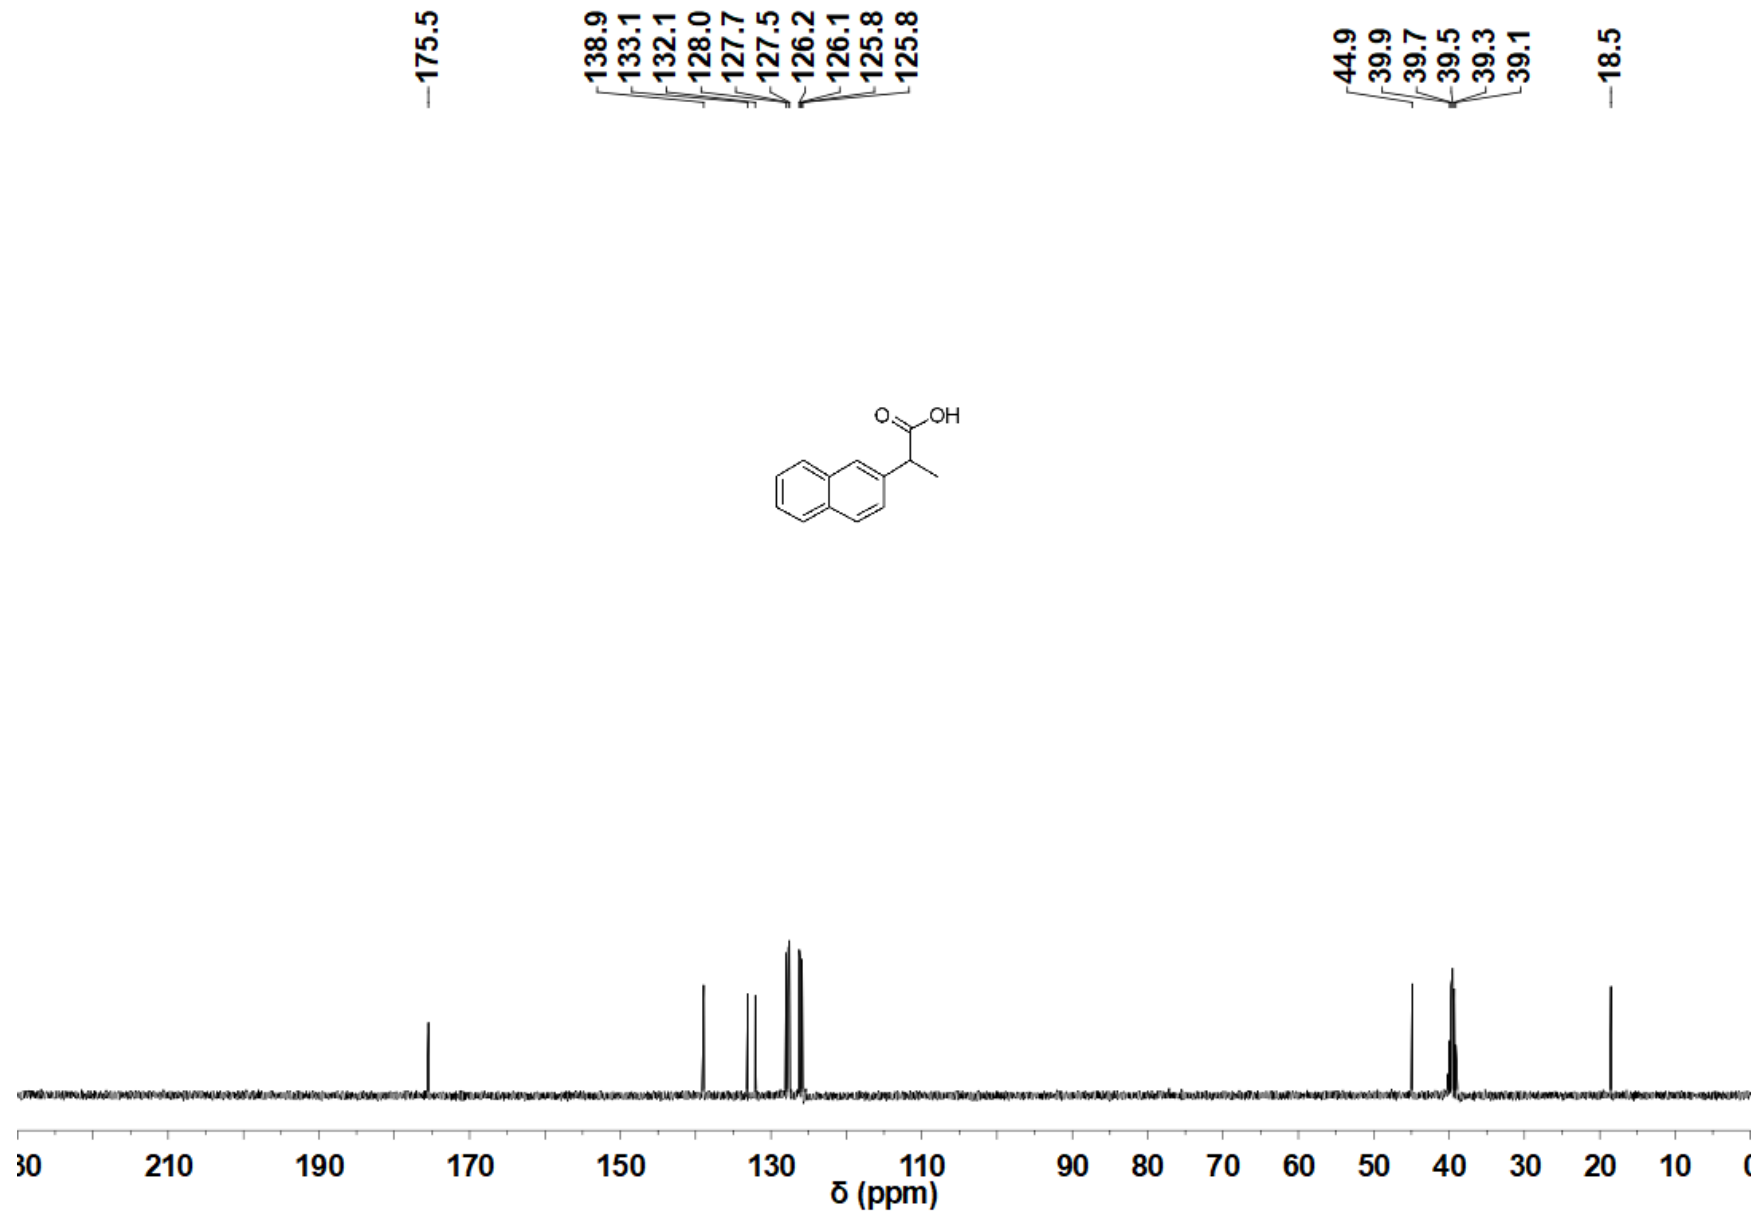

2-(2-methylphenyl) propanoic acid, **2p**  
400 MHz,  $\text{CDCl}_3$

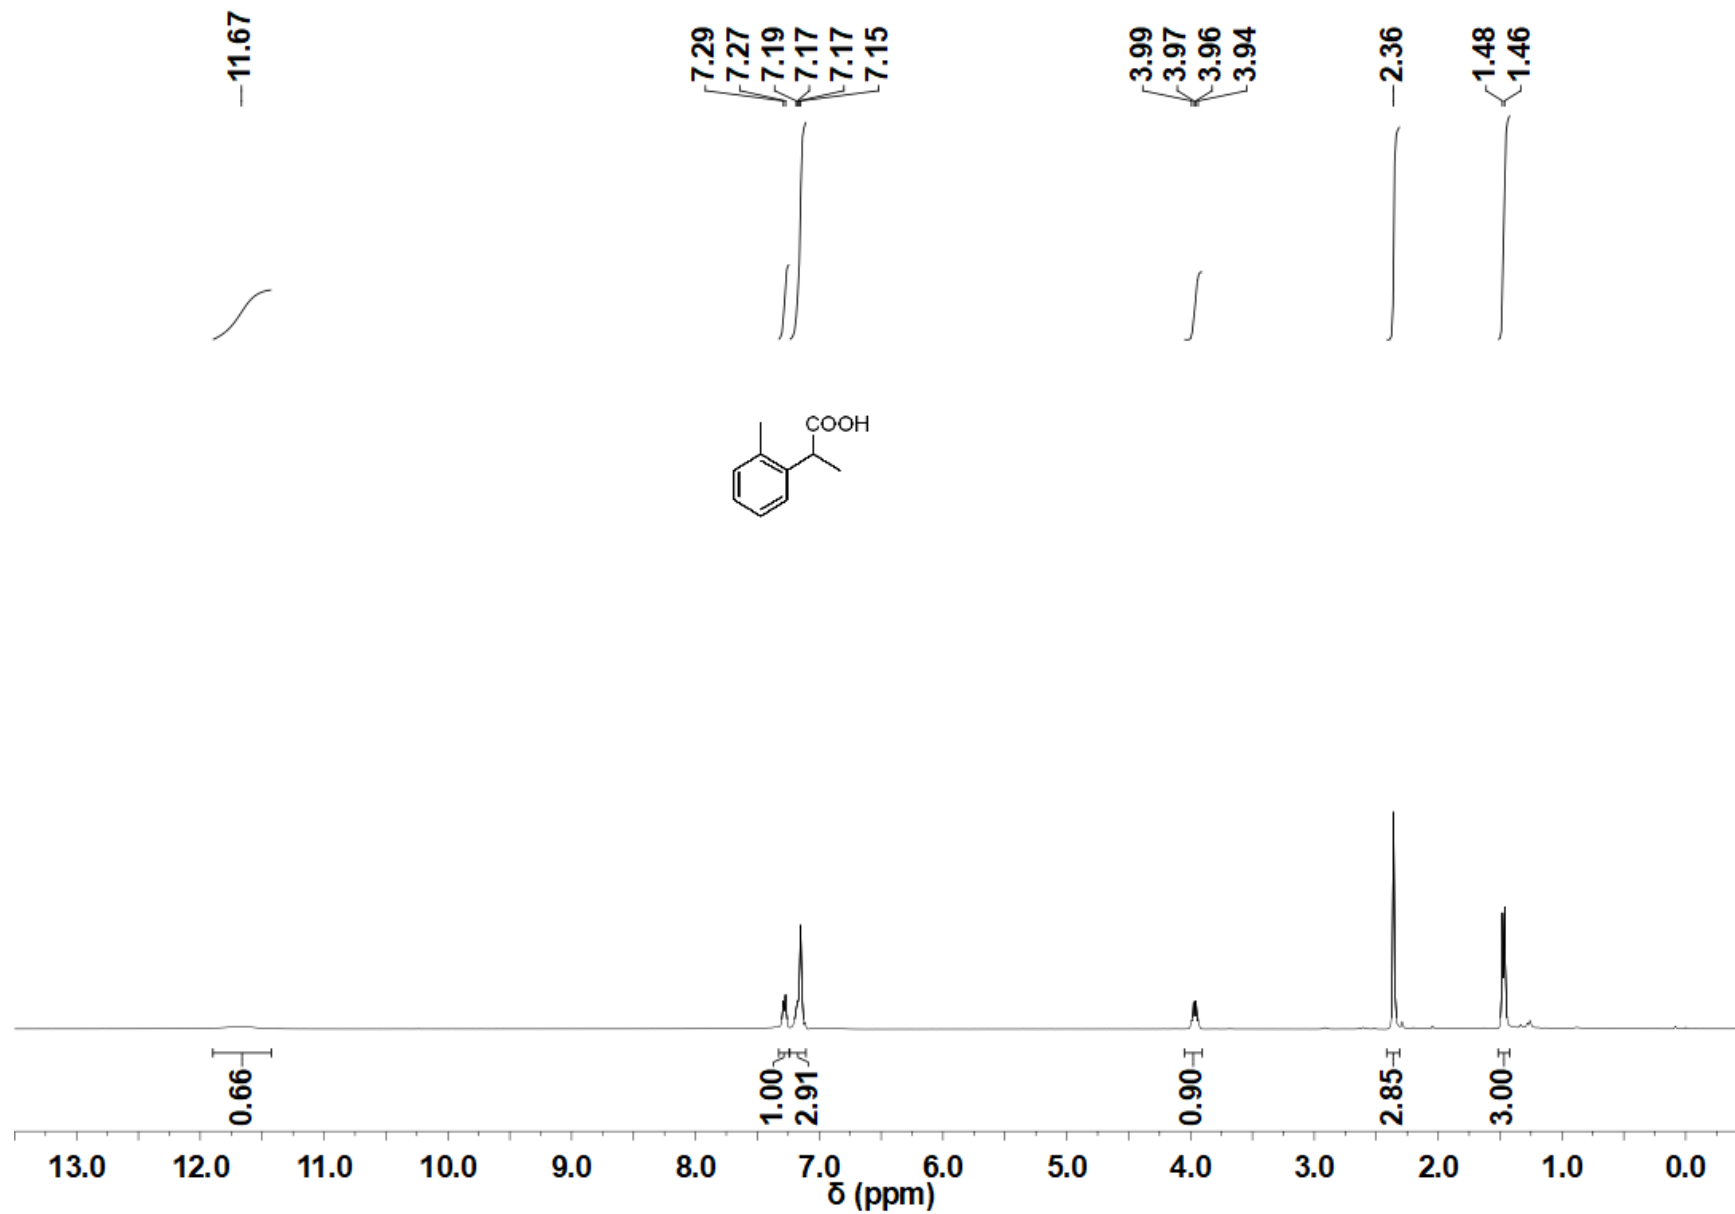

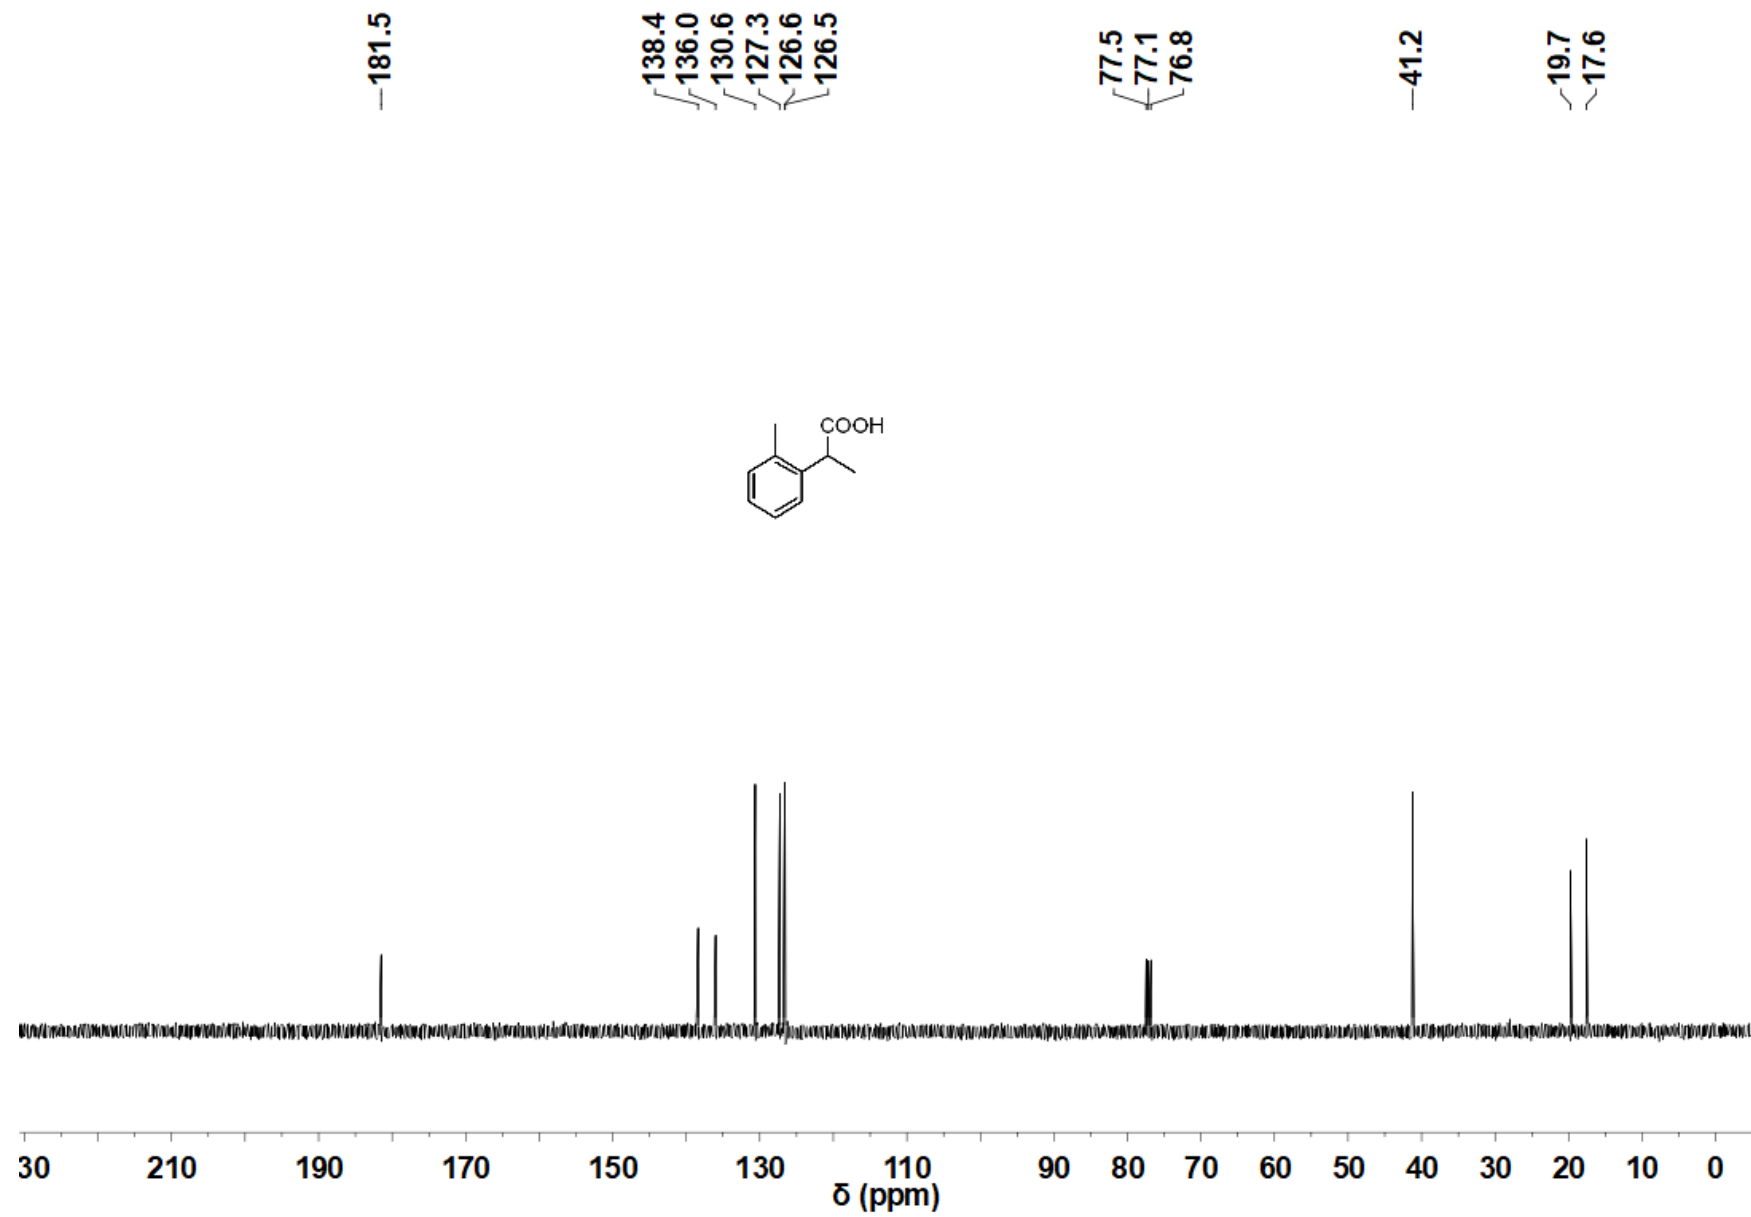



2-(2-methoxyphenyl)propanoic acid, **2q**  
400 MHz, CDCl<sub>3</sub>

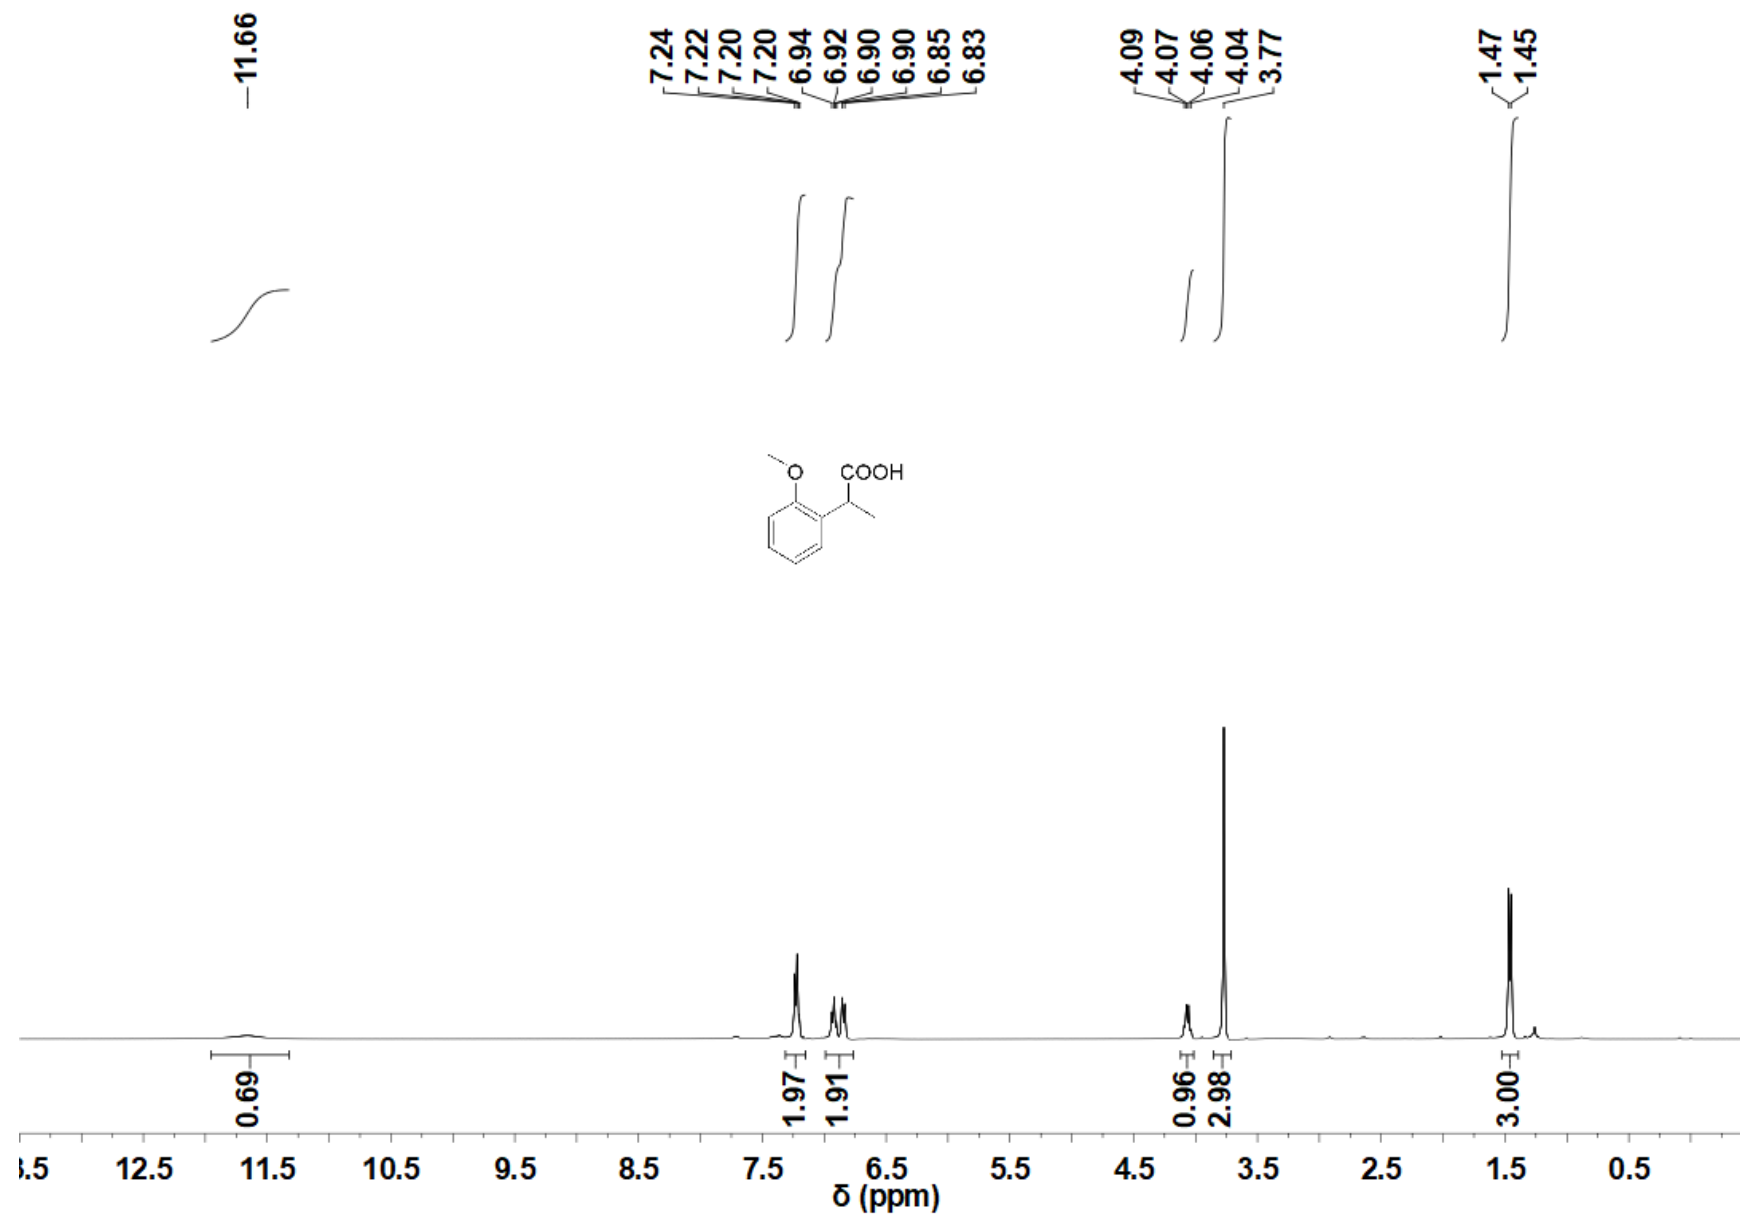

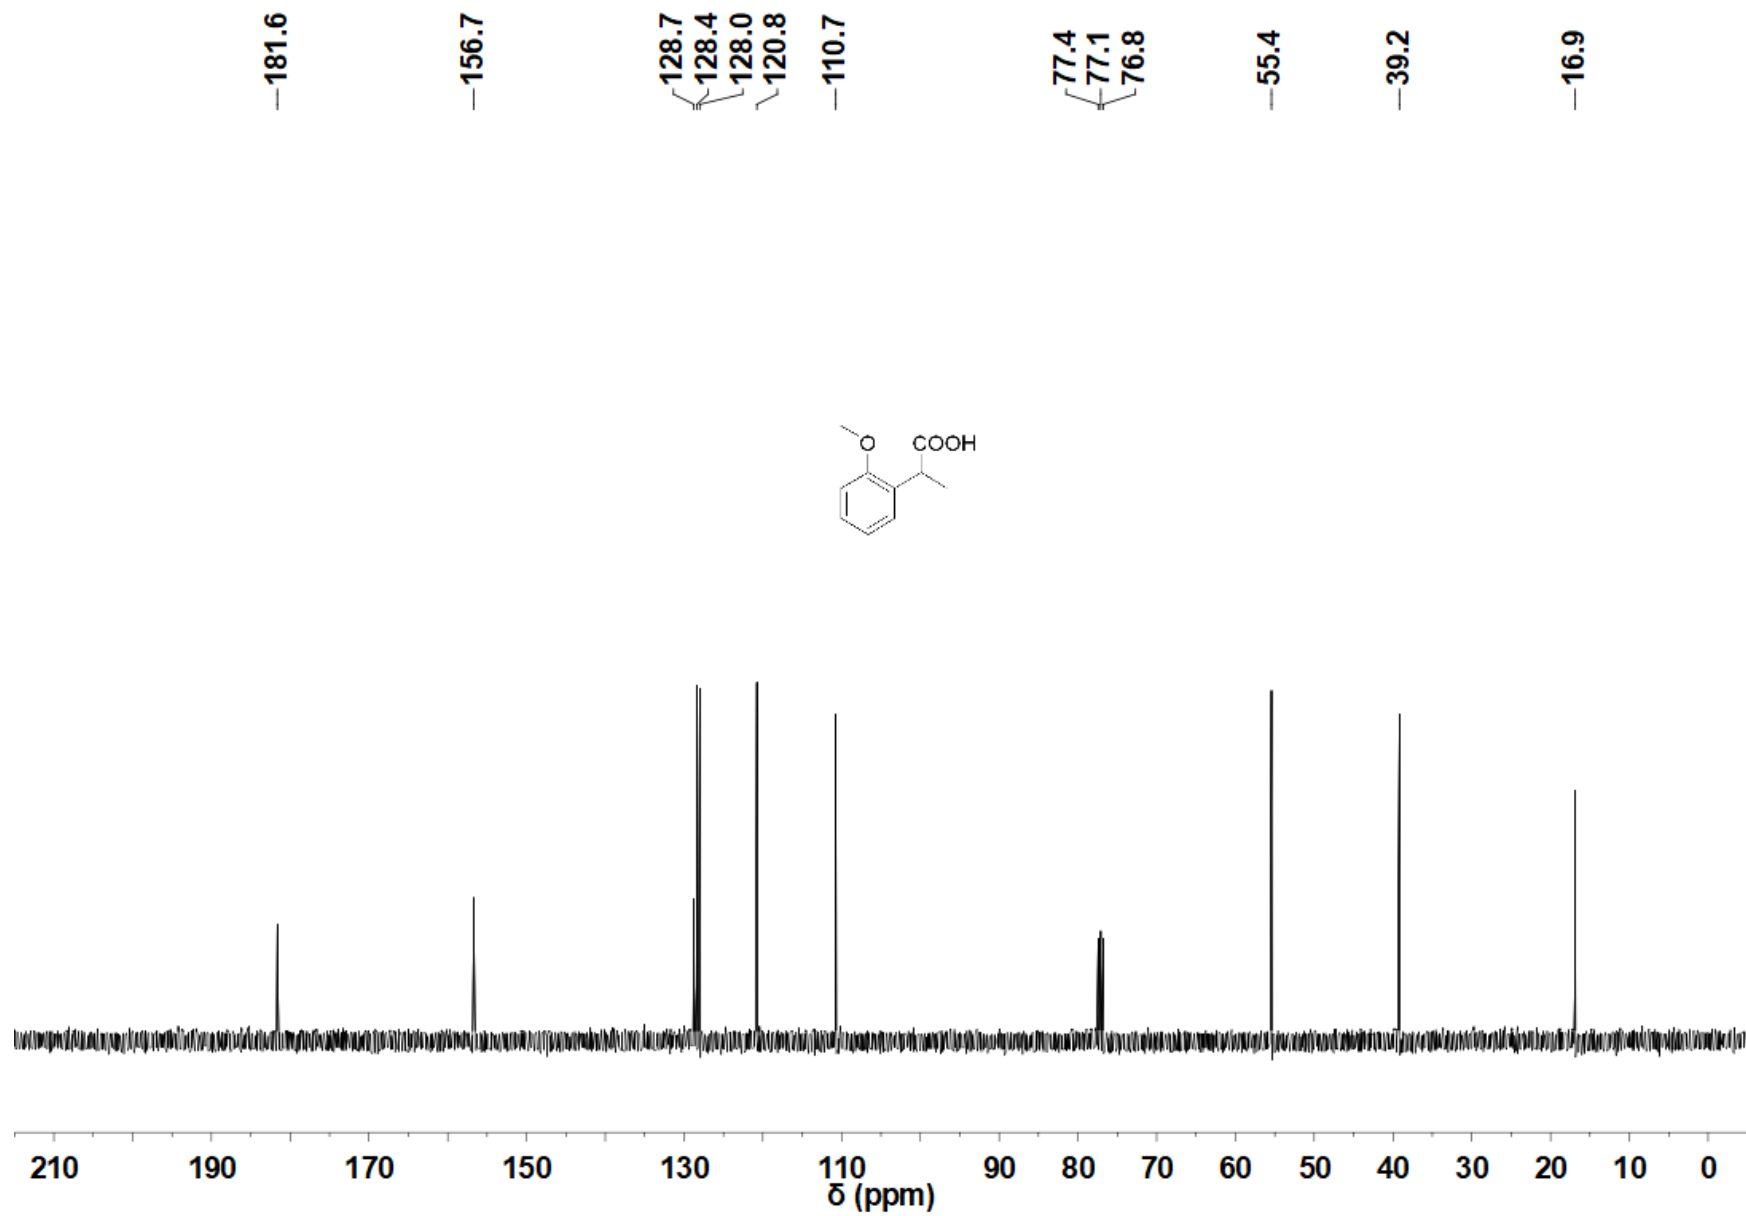

2-(2-fluorophenyl) propionic acid, **2r**  
400 MHz, CDCl<sub>3</sub>

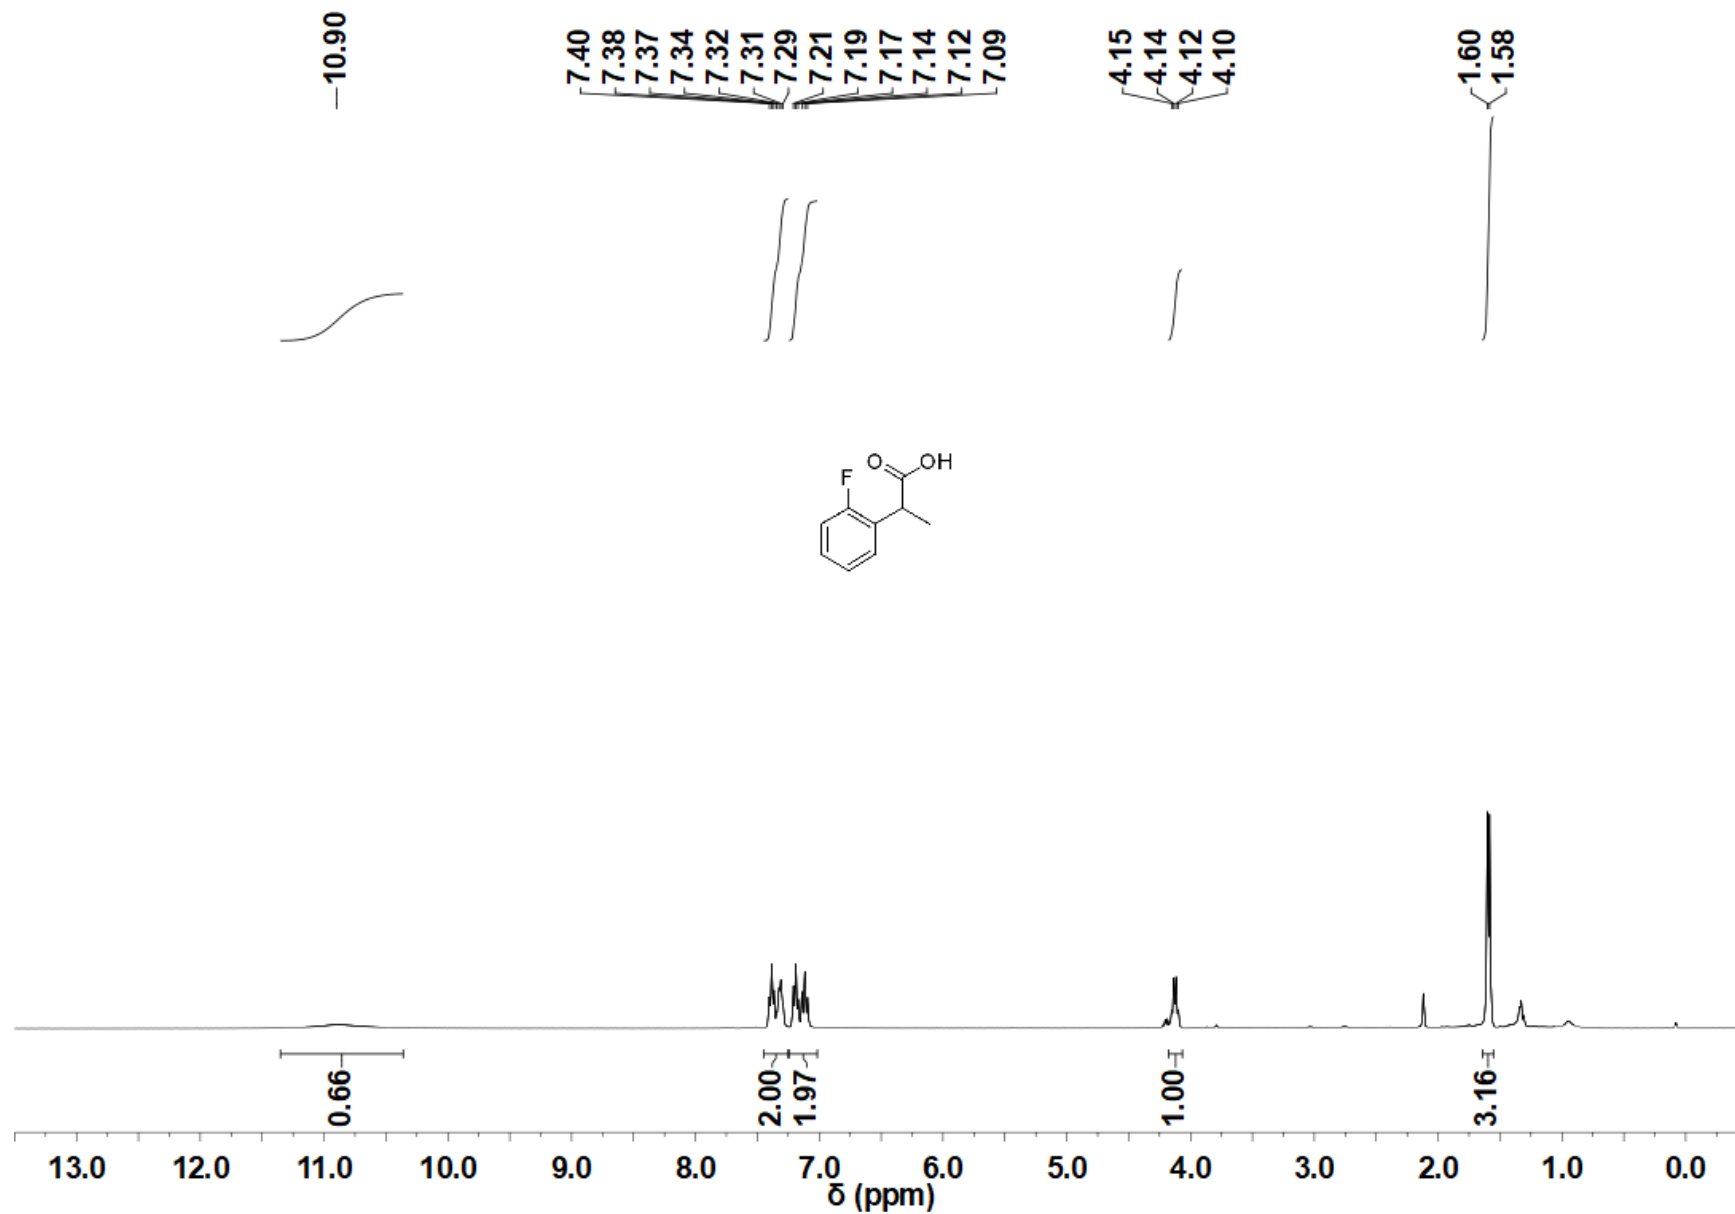

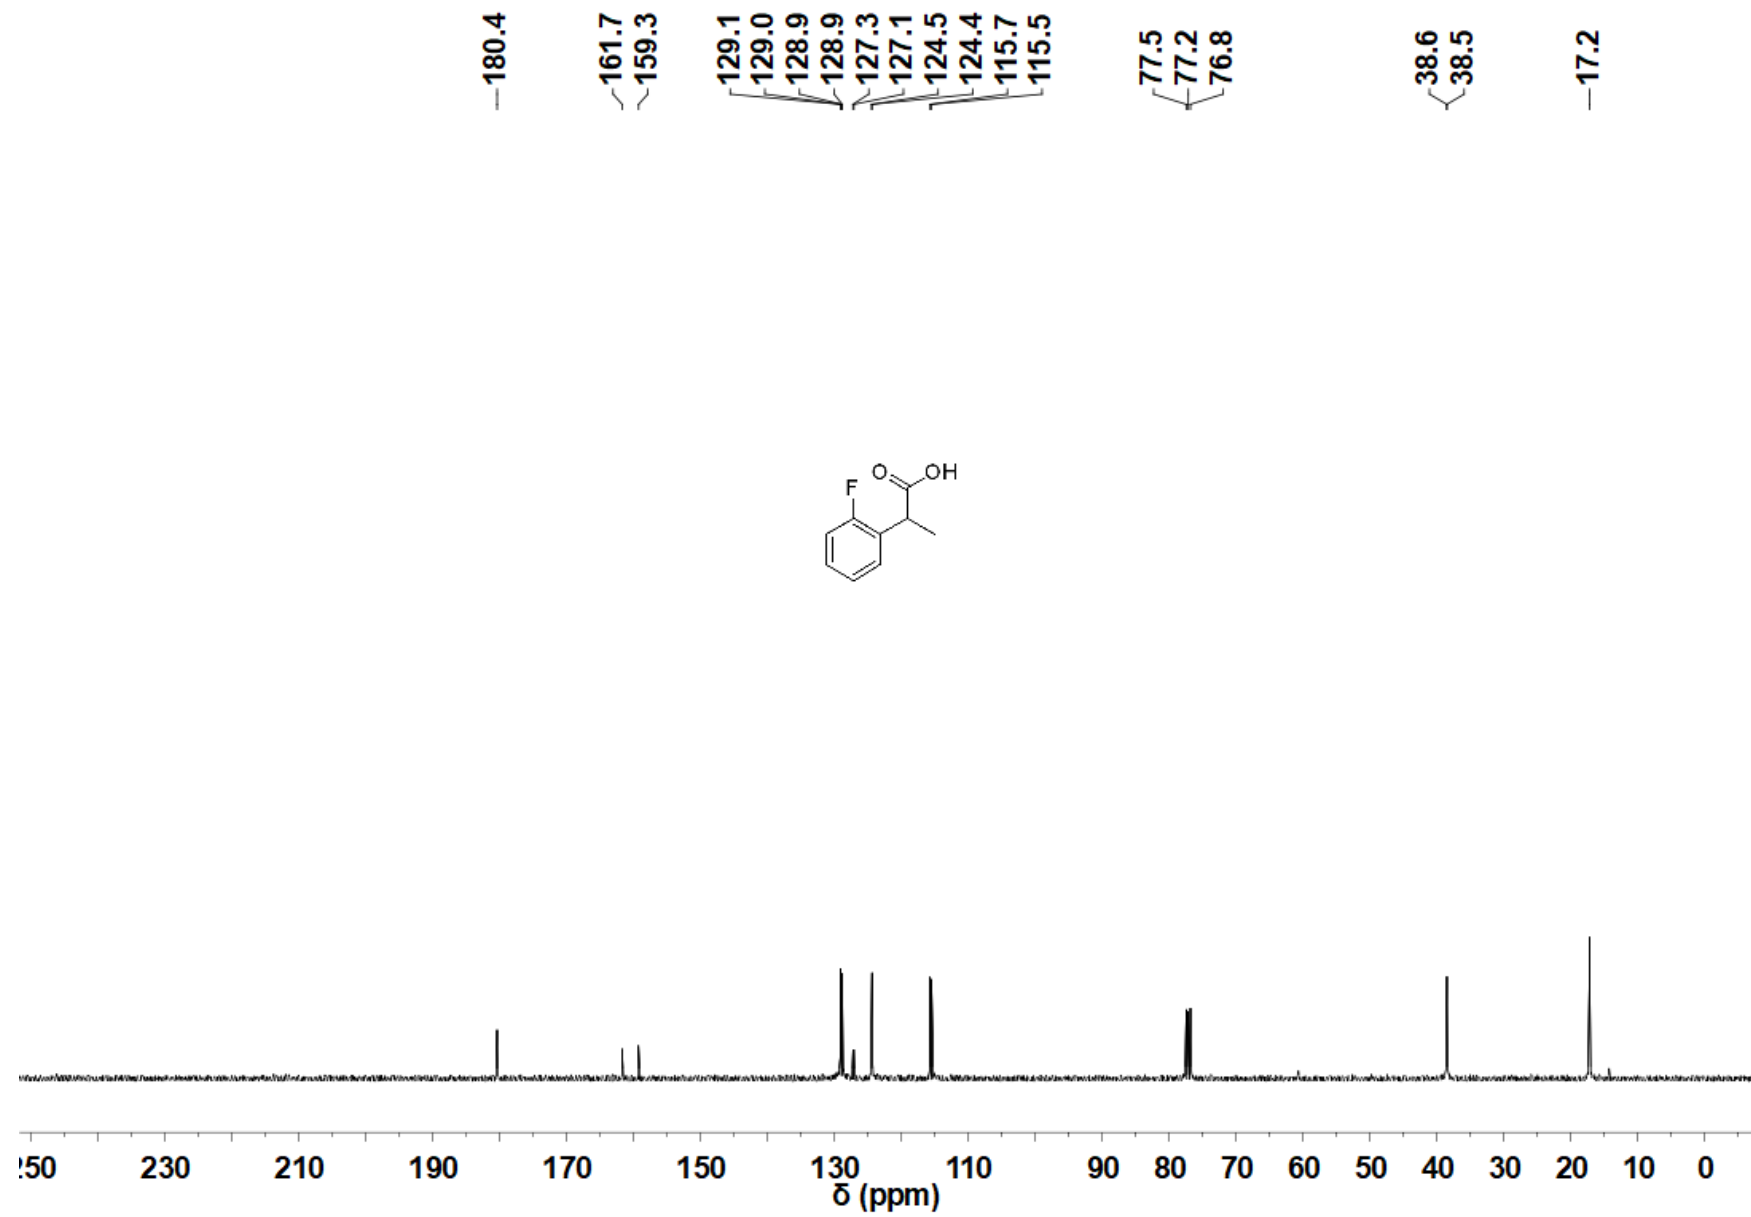

2-(2-chlorophenyl) propionic acid, **2s**  
400 MHz, CDCl<sub>3</sub>

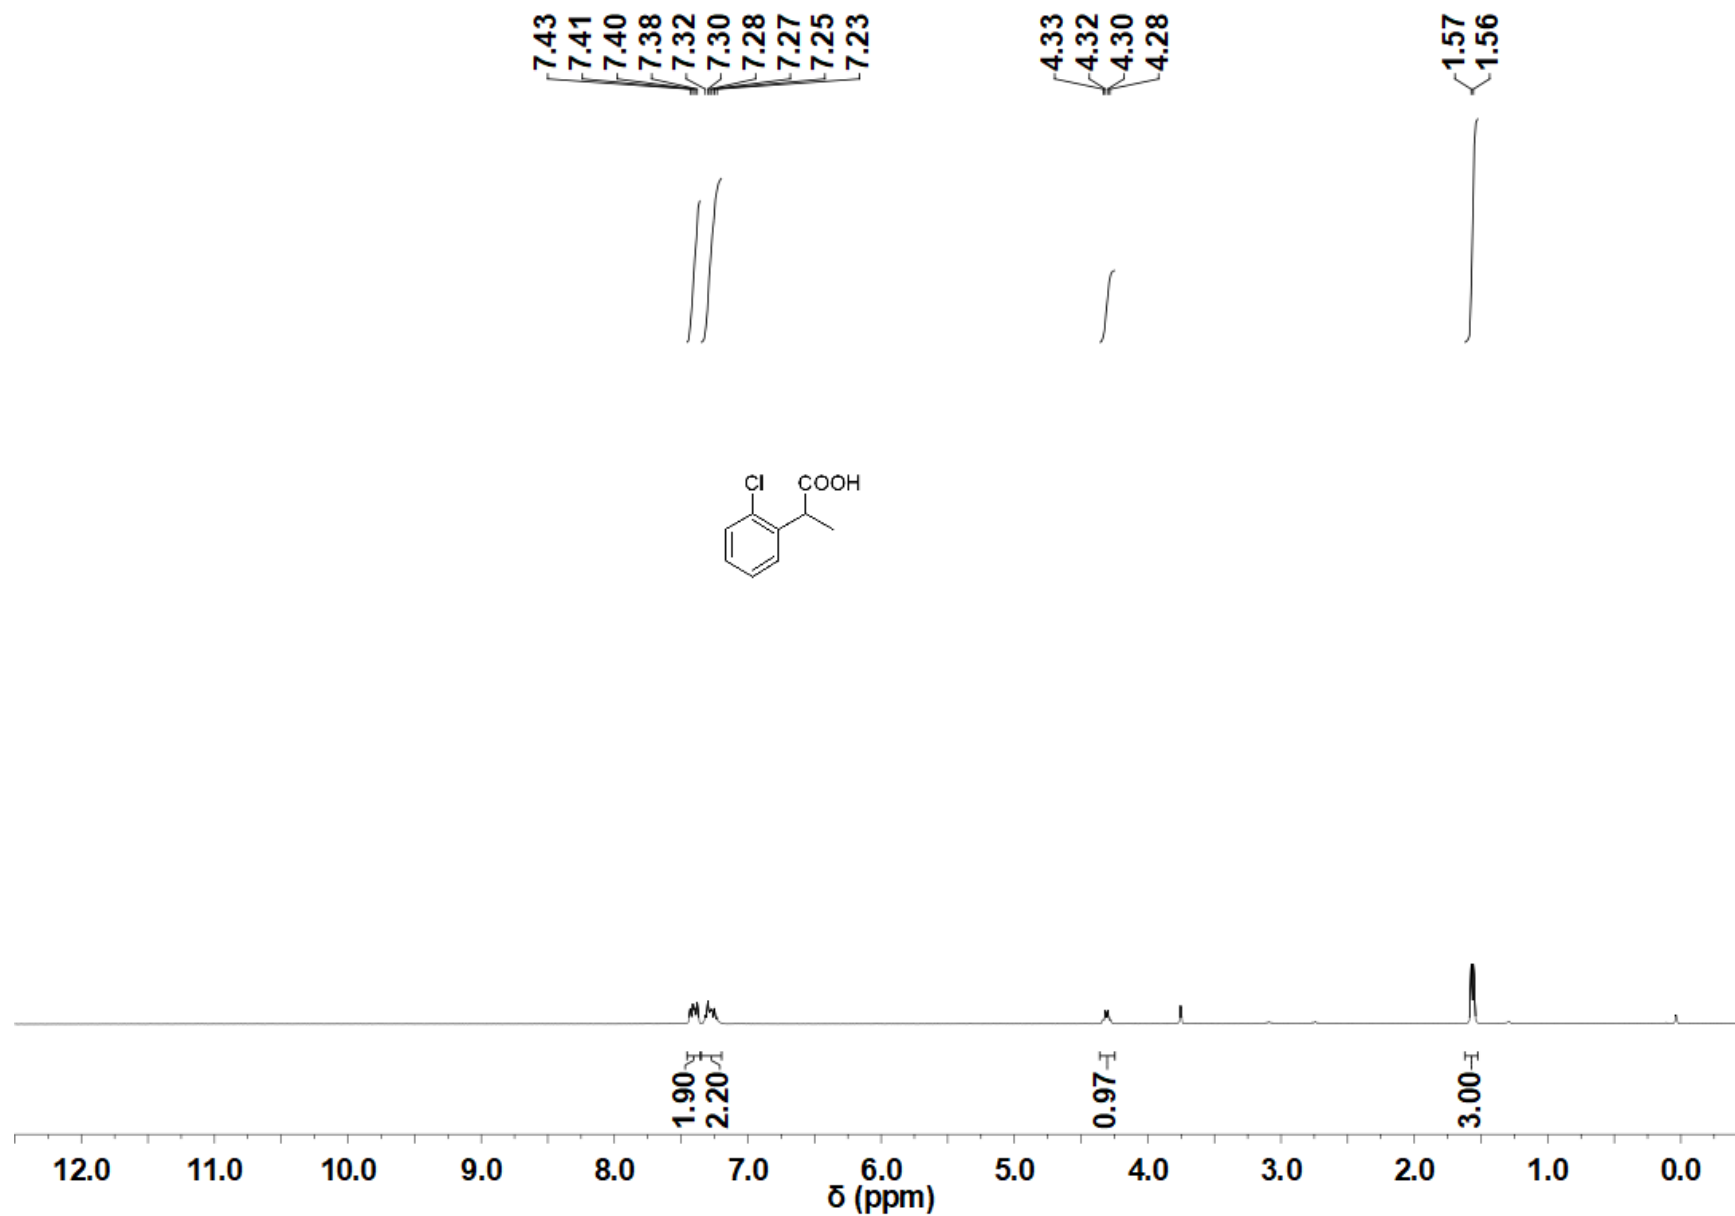

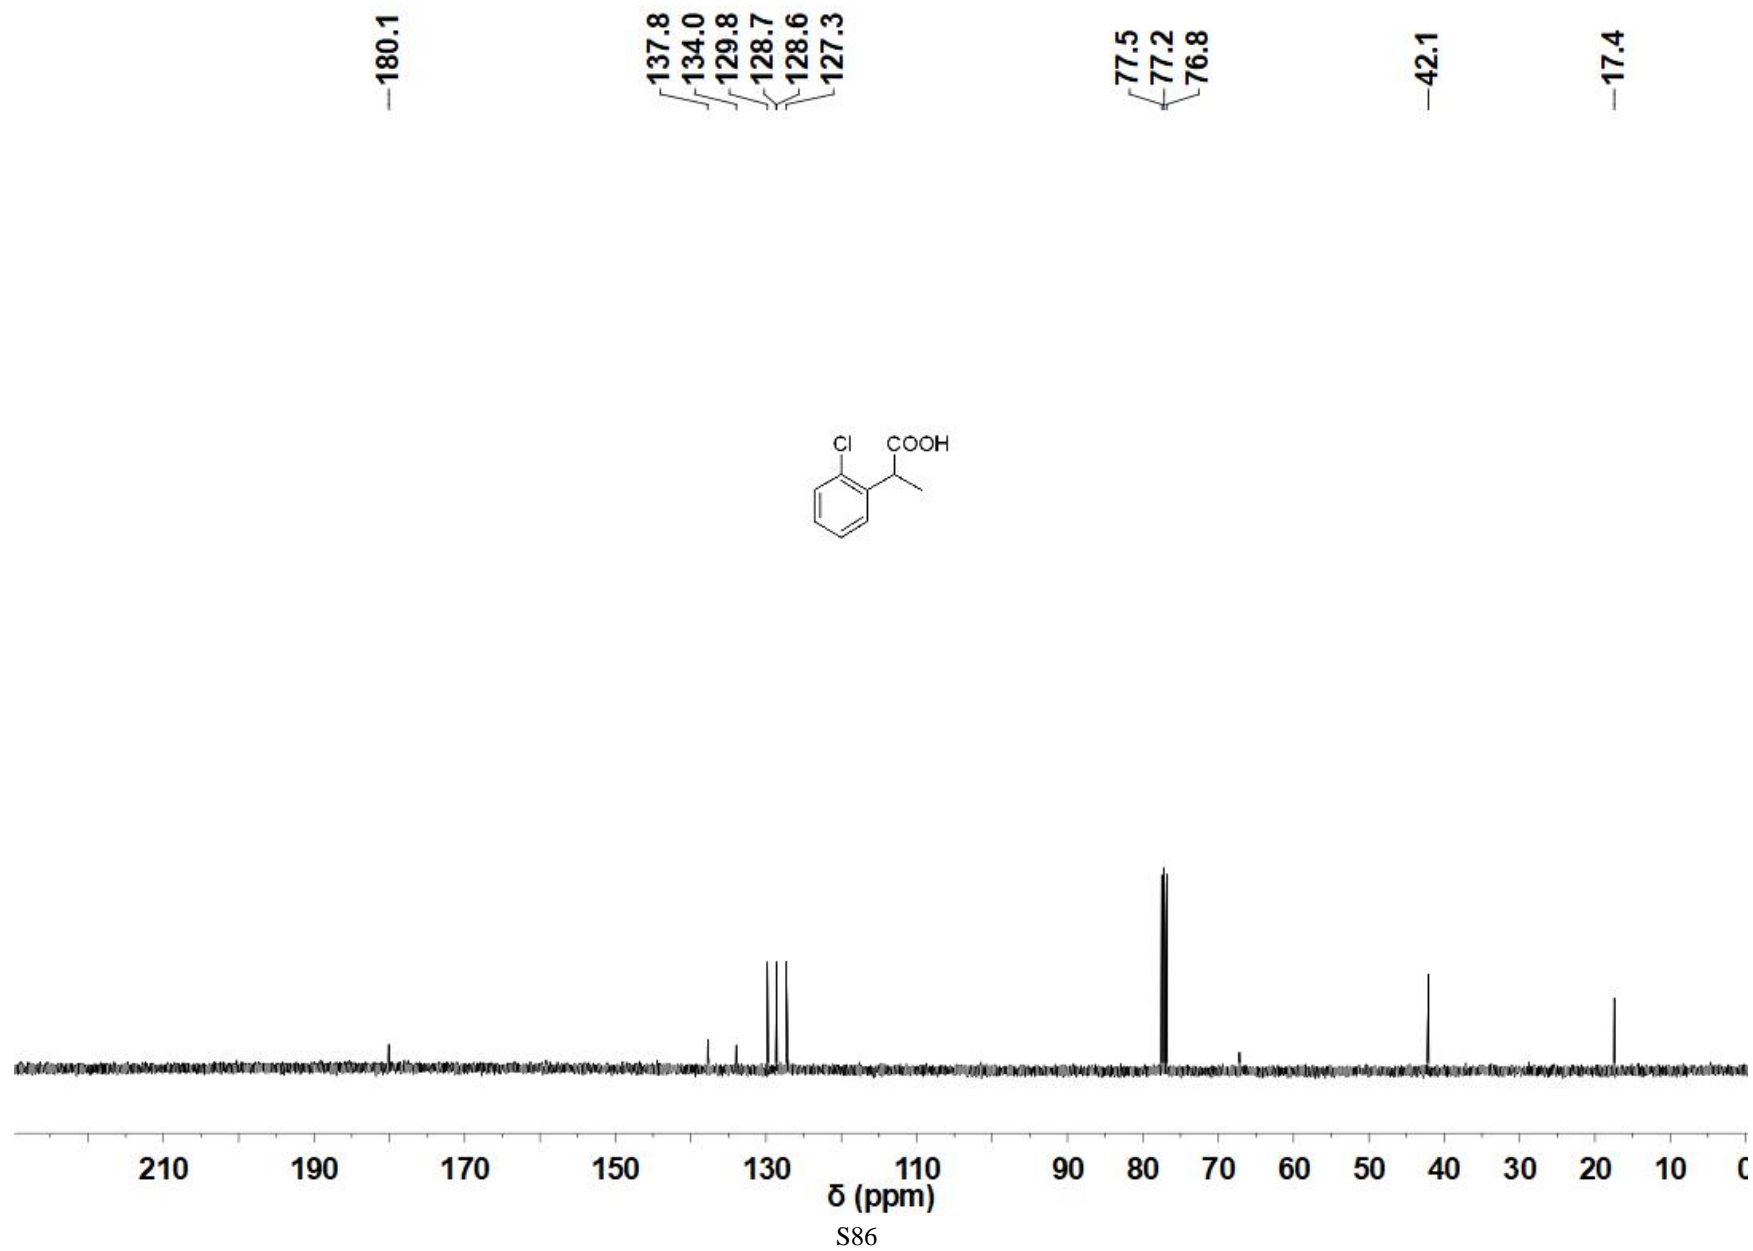

2-pyridyl propionic acid, **2t**  
400 MHz, CDCl<sub>3</sub>

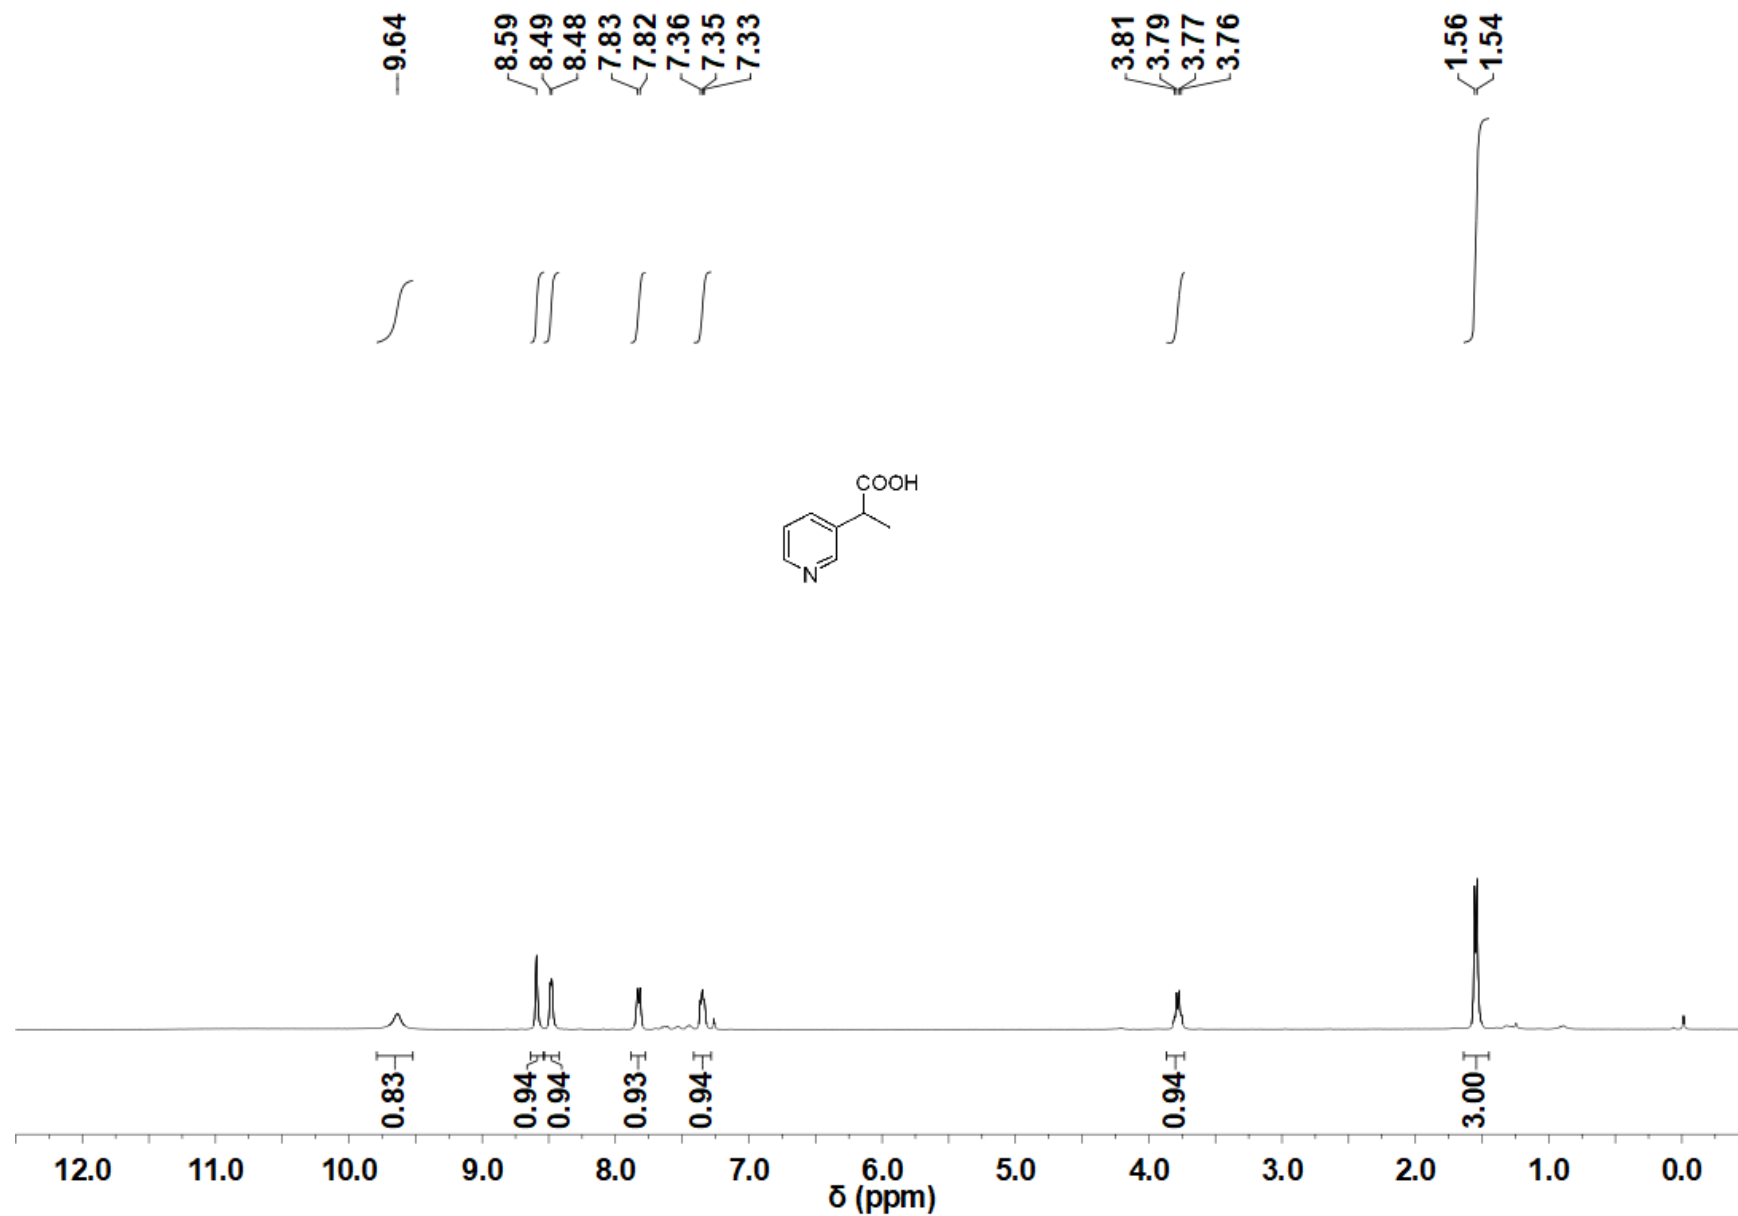

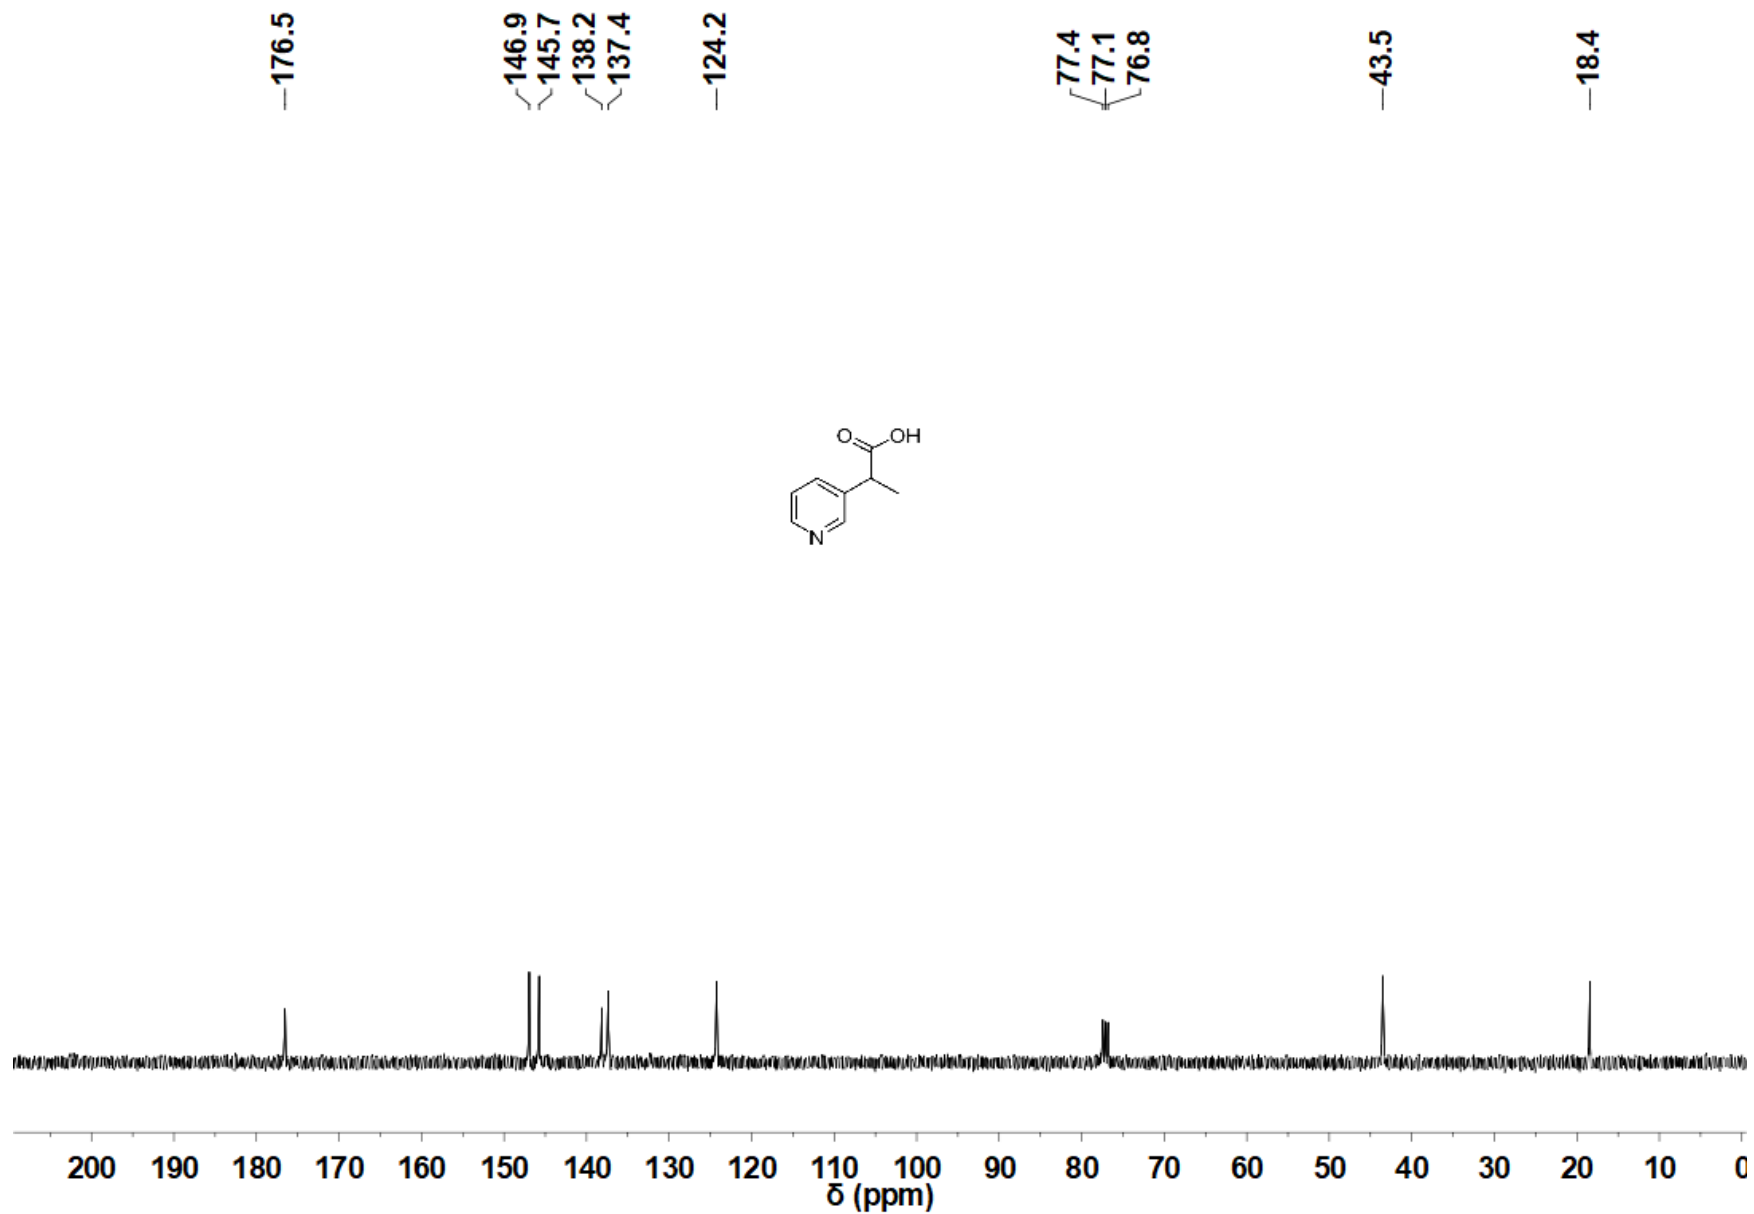



# Qualitative Compound Report

|                        |                       |                               |            |
|------------------------|-----------------------|-------------------------------|------------|
| <b>Data File</b>       | HZJ-3-11-3+.d         | <b>Sample Name</b>            | HZJ-3-11-3 |
| <b>Sample Type</b>     | Sample                | <b>Position</b>               | Vial 25    |
| <b>Instrument Name</b> | 6530 QTOF LC/MS       | <b>Acq Method</b>             | my-MS.m    |
| <b>Acquired Time</b>   | 5/18/2017 10:46:44 AM | <b>IRM Calibration Status</b> | Success    |

## Compound Table

| Compound Label | RT    | Mass     | Abund | Formula    | Tgt Mass | Diff (ppm) |
|----------------|-------|----------|-------|------------|----------|------------|
| Cpd 1: 0.176   | 0.176 | 151.0633 | 2973  | C8 H9 N O2 | 151.0633 | -0.43      |

| Compound Label | m/z      | RT    | Algorithm       | Mass     |
|----------------|----------|-------|-----------------|----------|
| Cpd 1: 0.176   | 150.0558 | 0.176 | Find By Formula | 151.0633 |

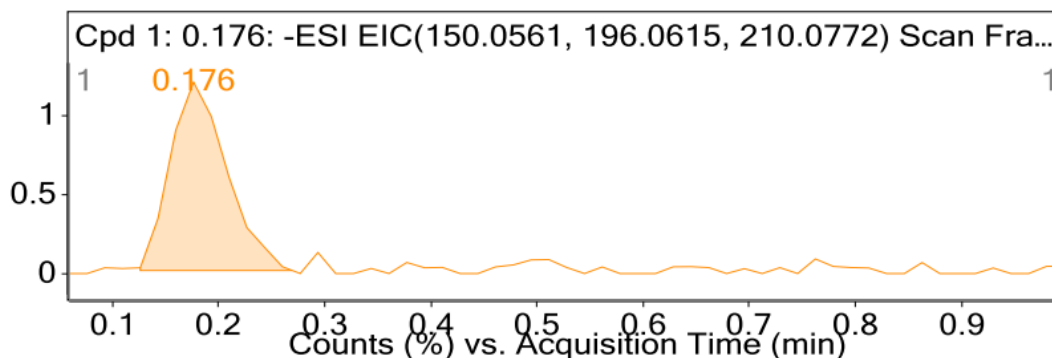

## MS Spectrum

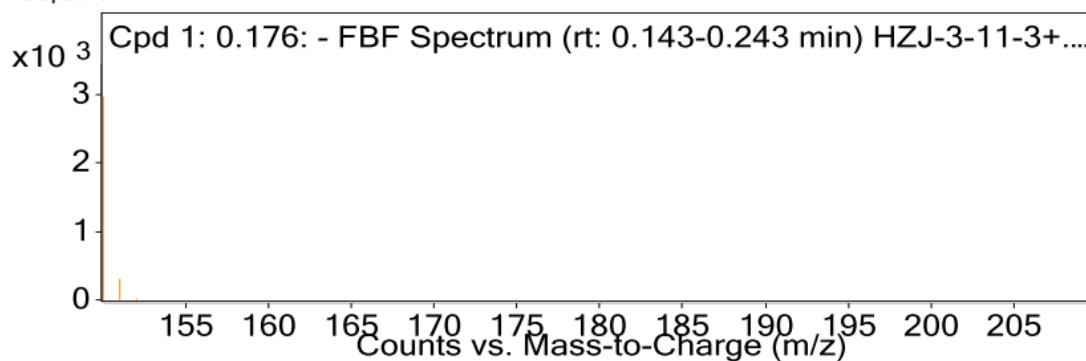

## MS Zoomed Spectrum

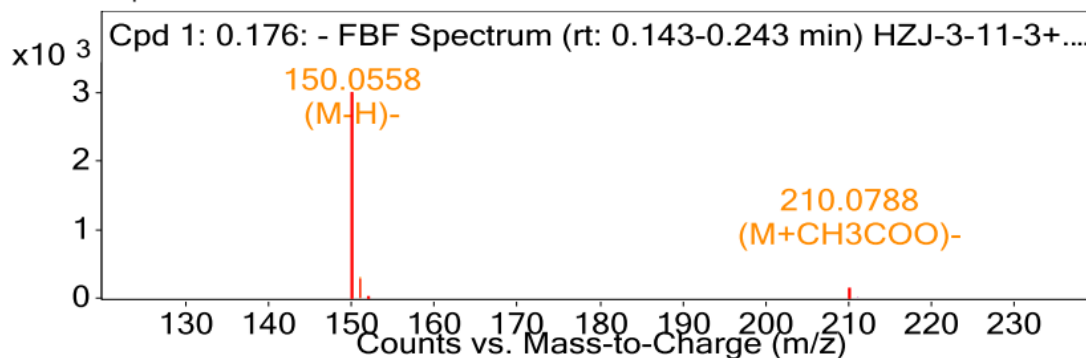

Cyclohexanecarboxylic acid, **2u**  
400 MHz, CDCl<sub>3</sub>

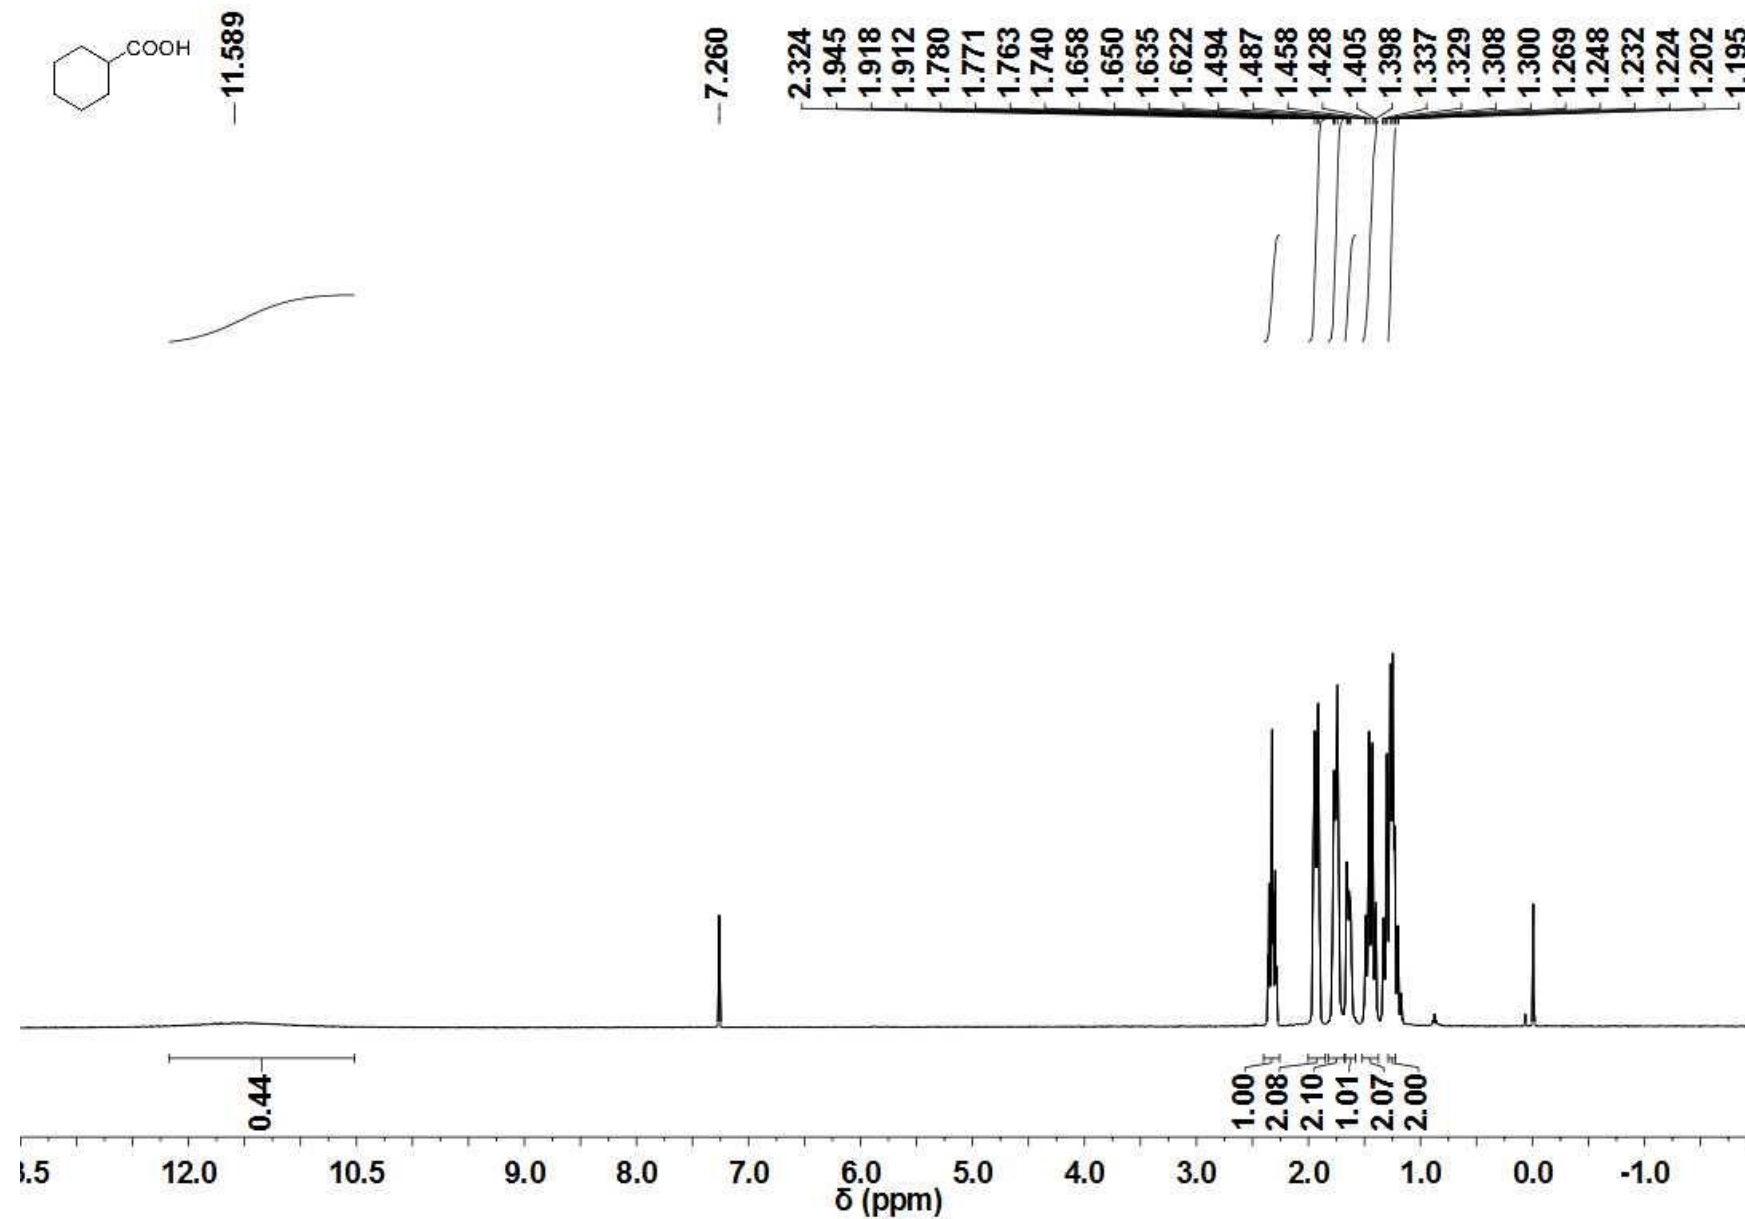

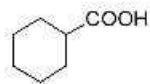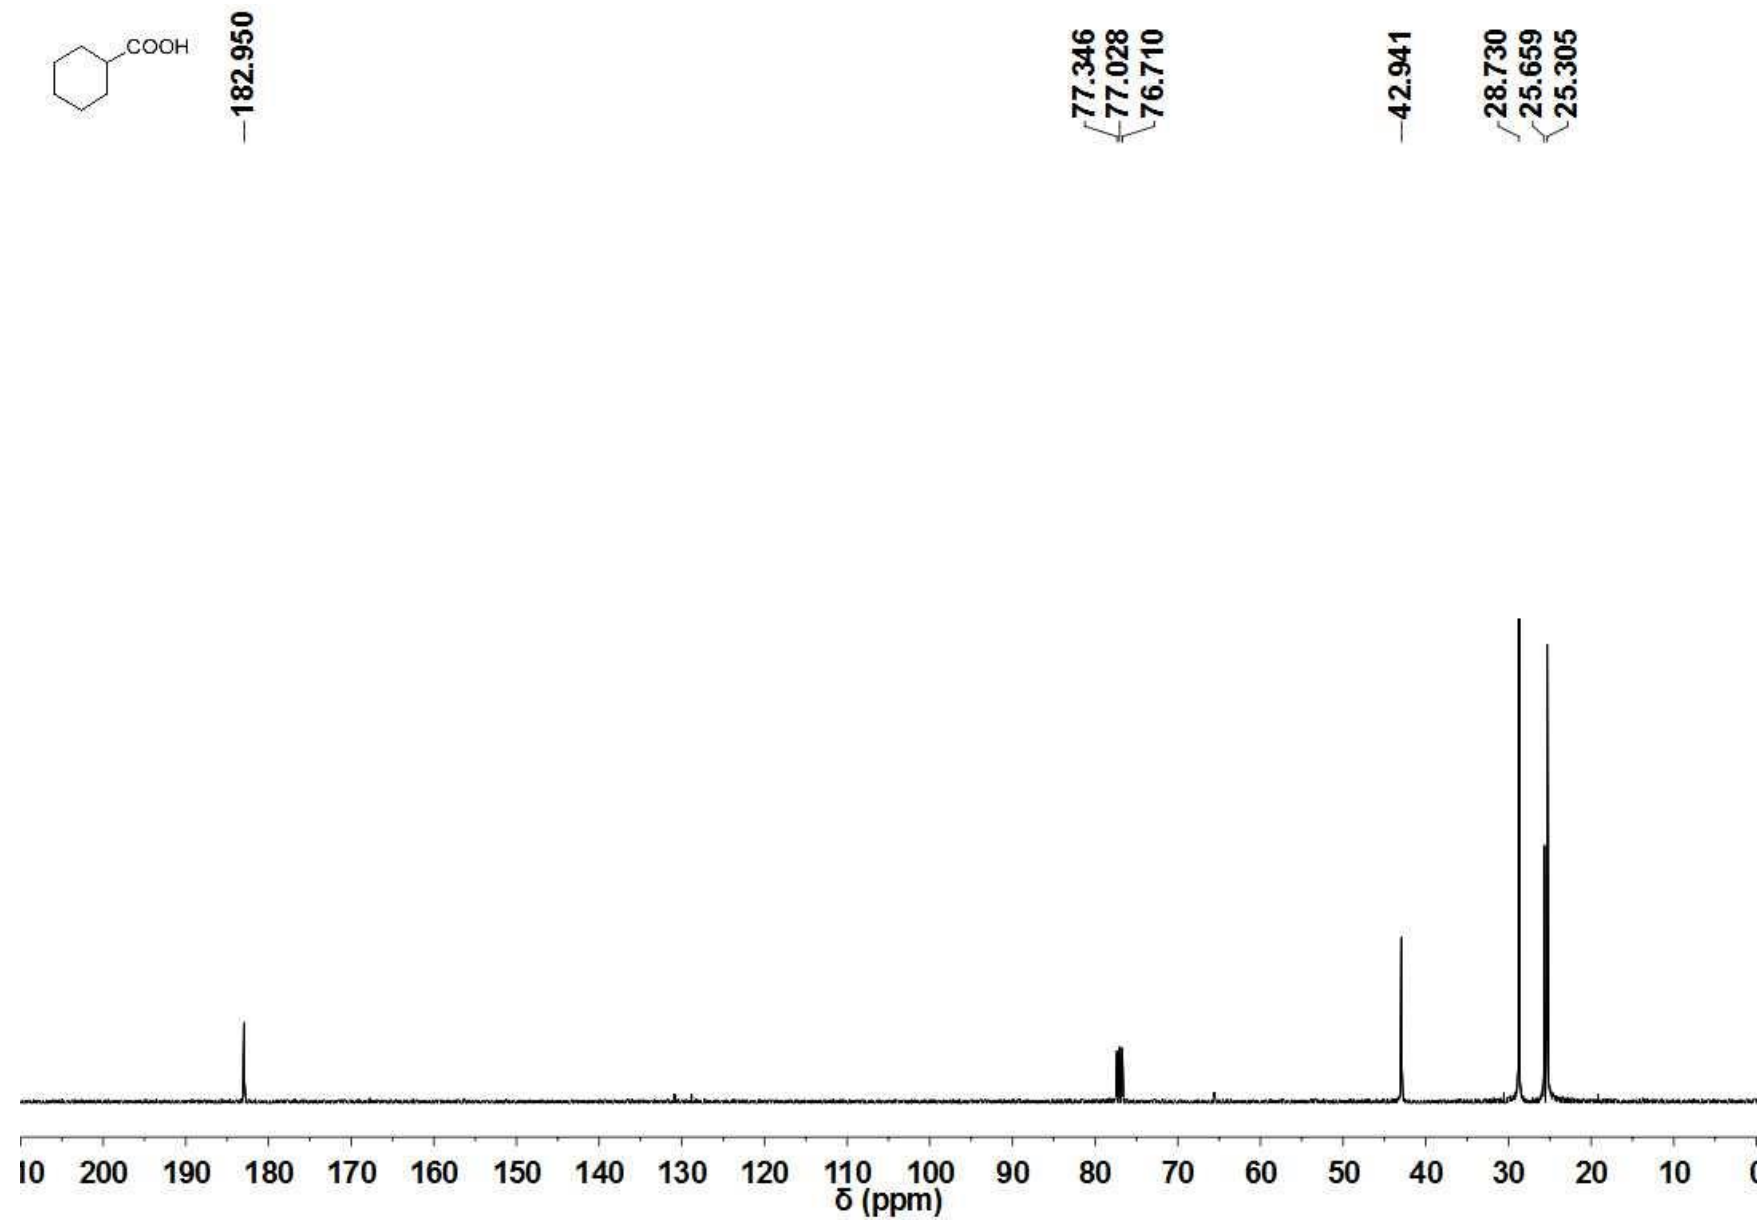

3-phenylbutyric acid, **2x**  
400 MHz, CDCl<sub>3</sub>

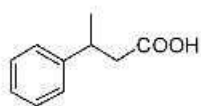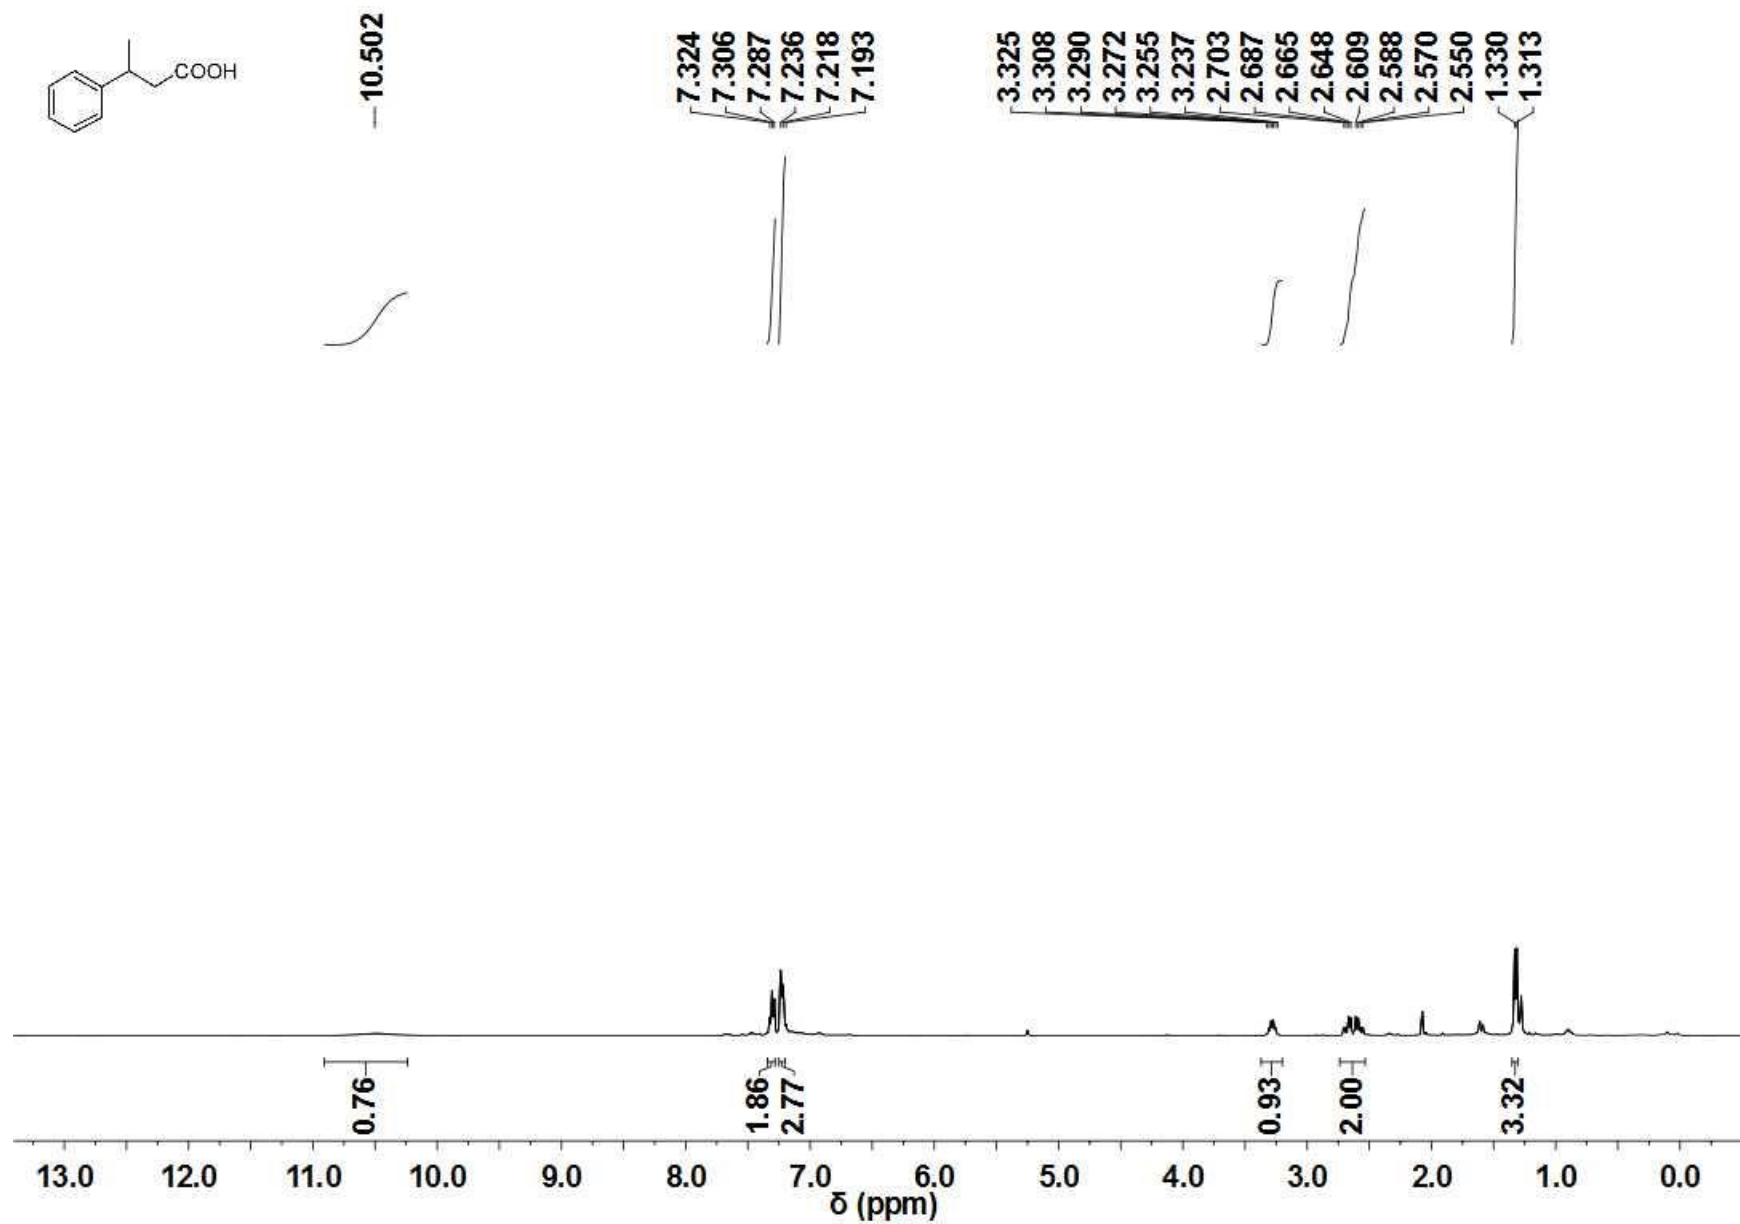

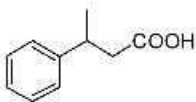

—178.915

—145.501

128.627

126.769

126.563

77.456

77.137

76.819

—42.687

—36.190

—21.921

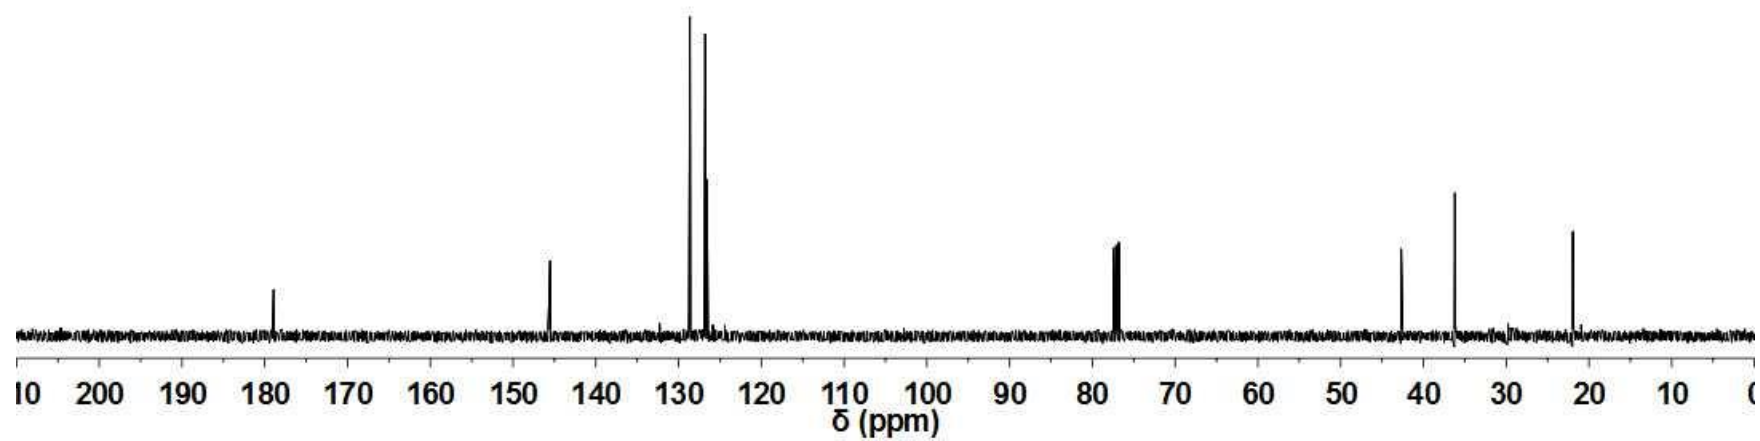

3-phenylpropionic acid, **3a**  
400 MHz, CDCl<sub>3</sub>

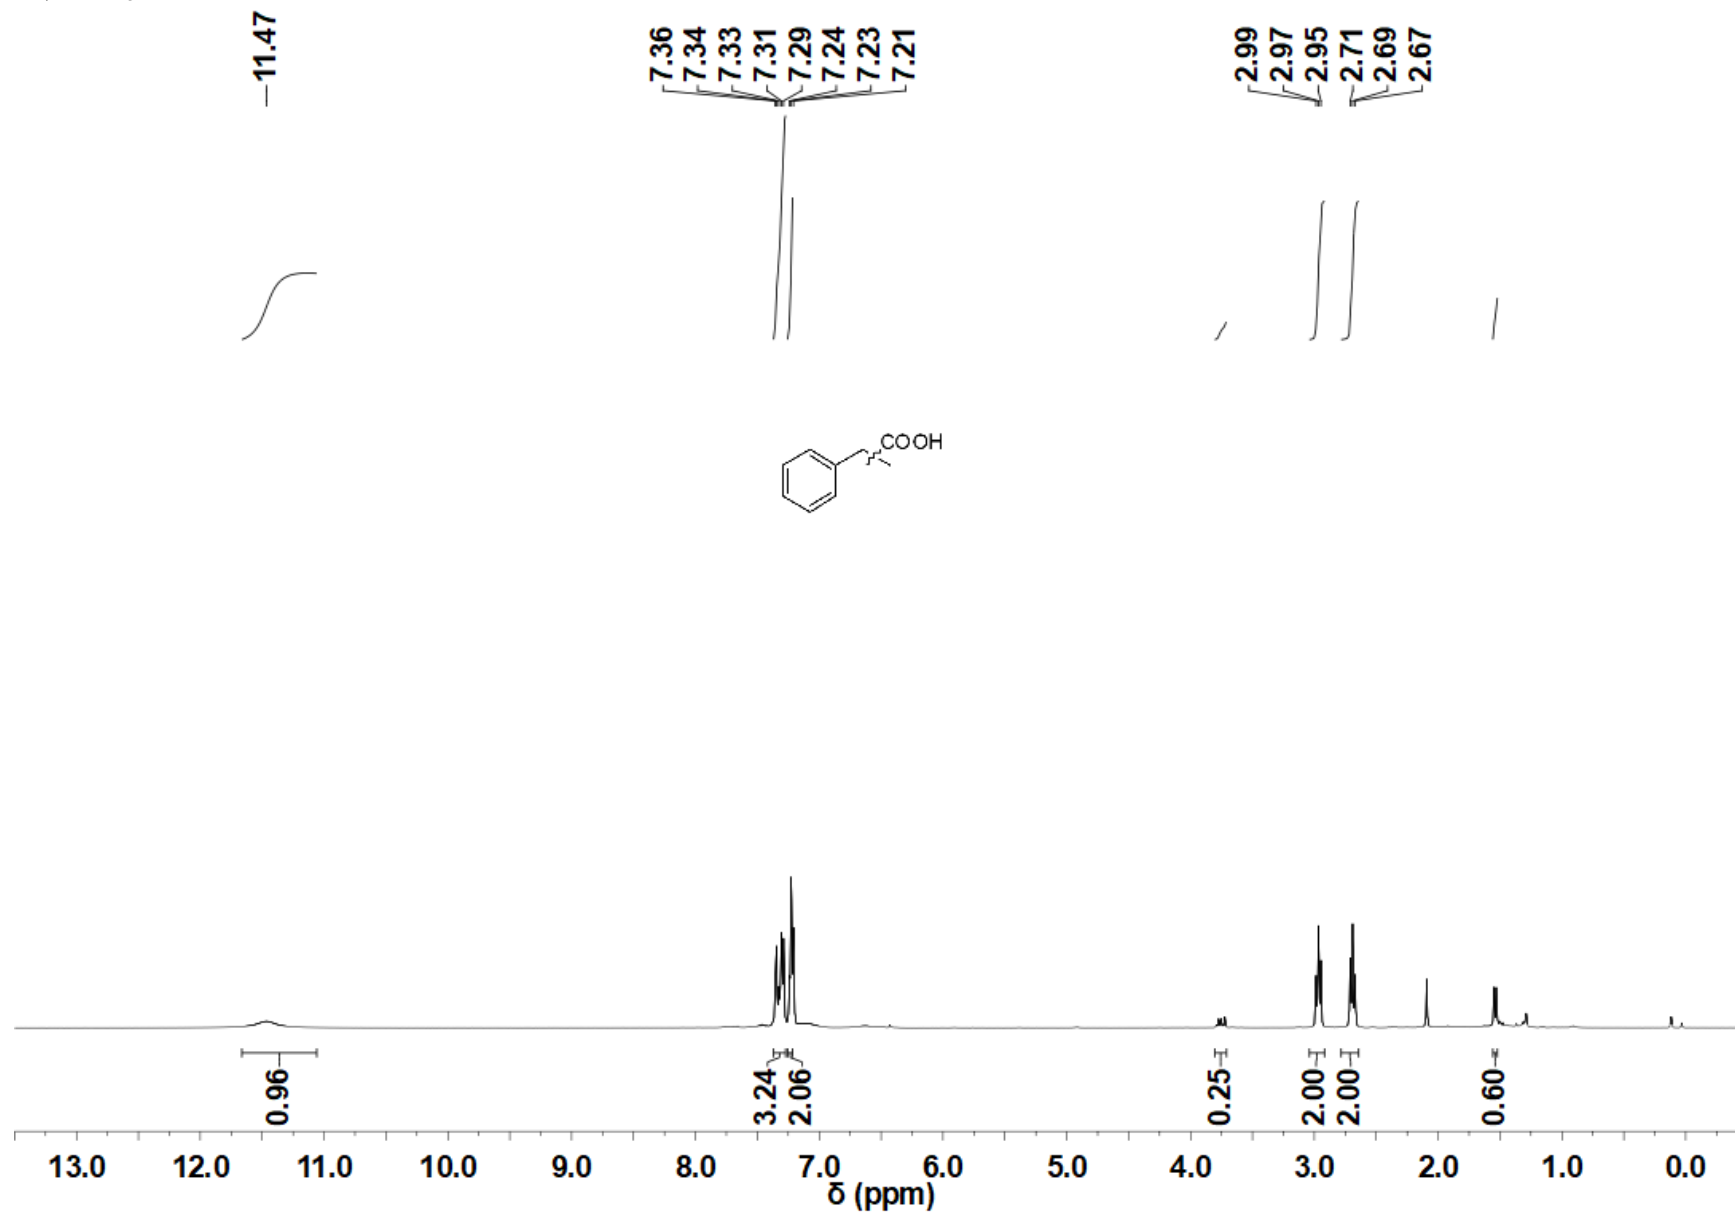

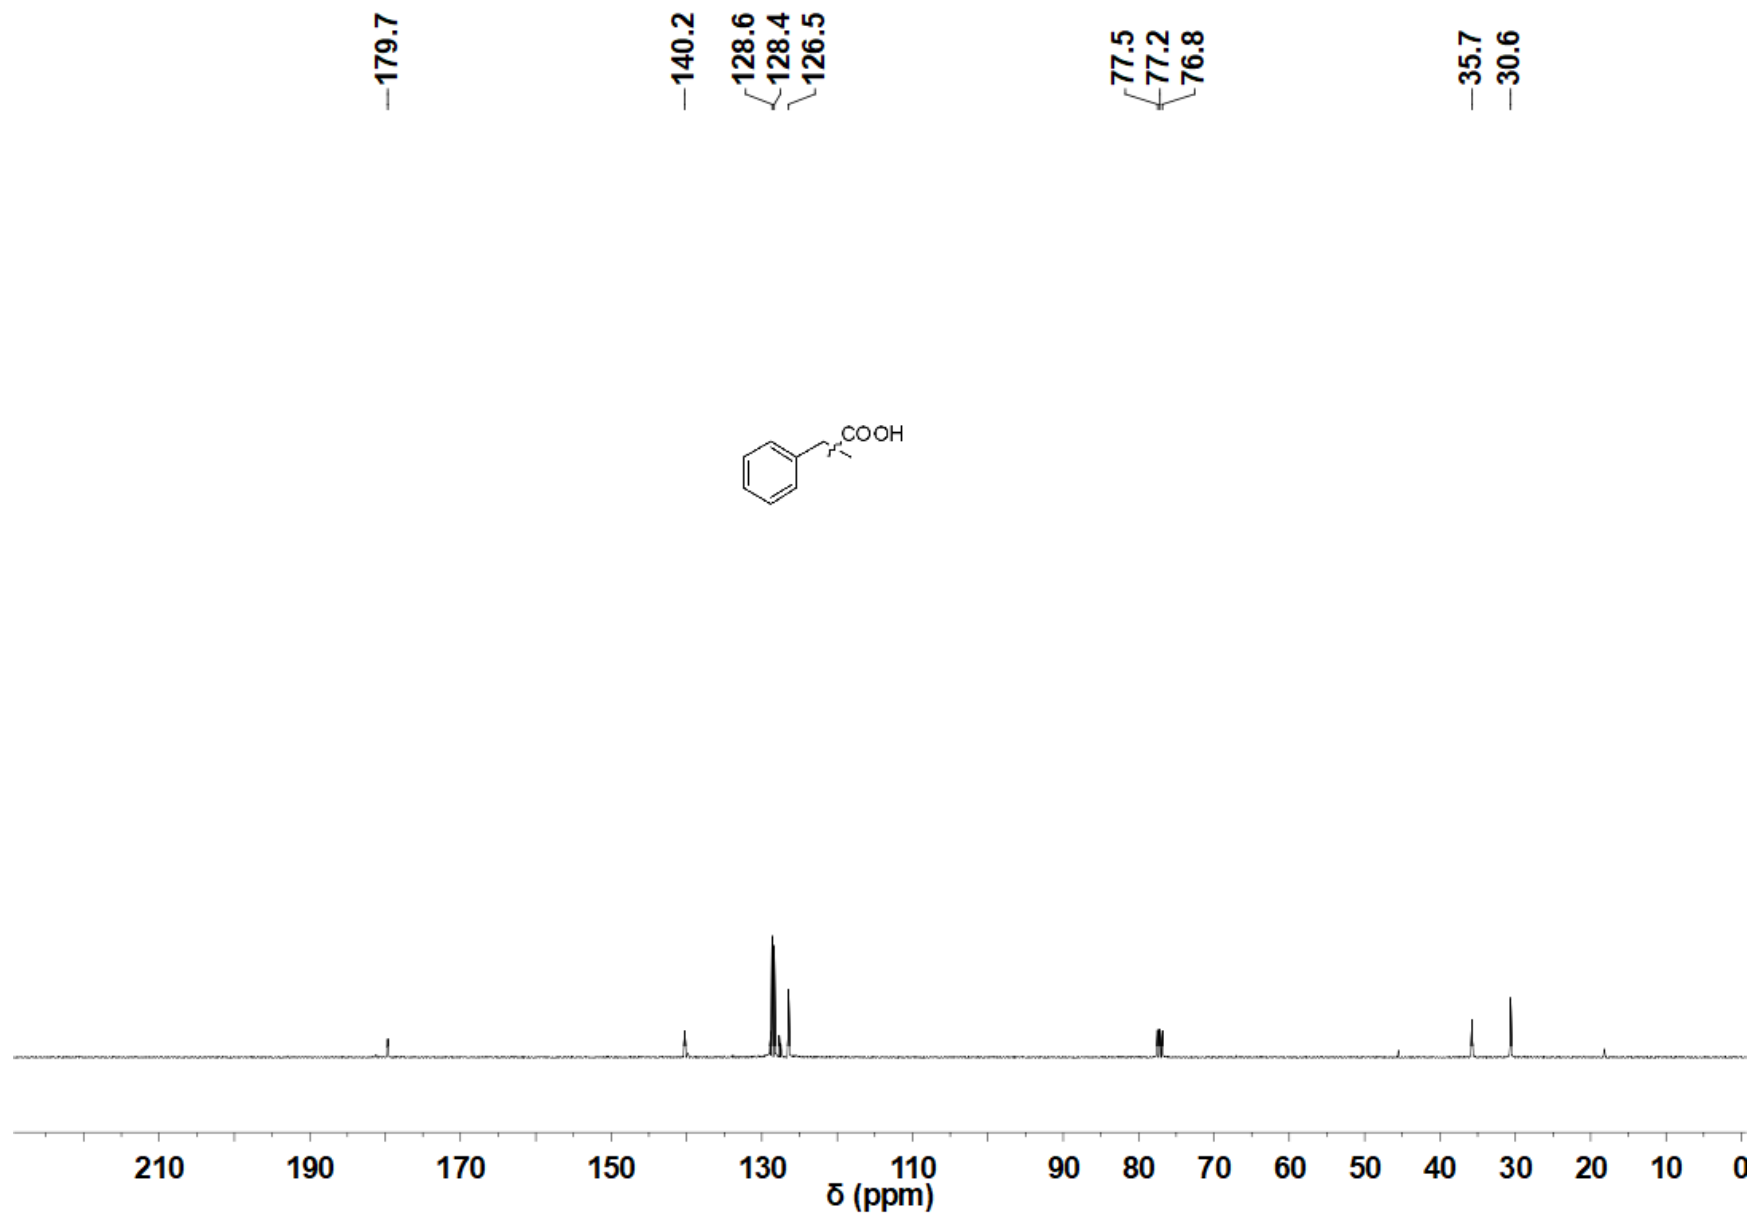

3-(4-methylphenyl) propanoic acid, **3b**  
400 MHz, CDCl<sub>3</sub>

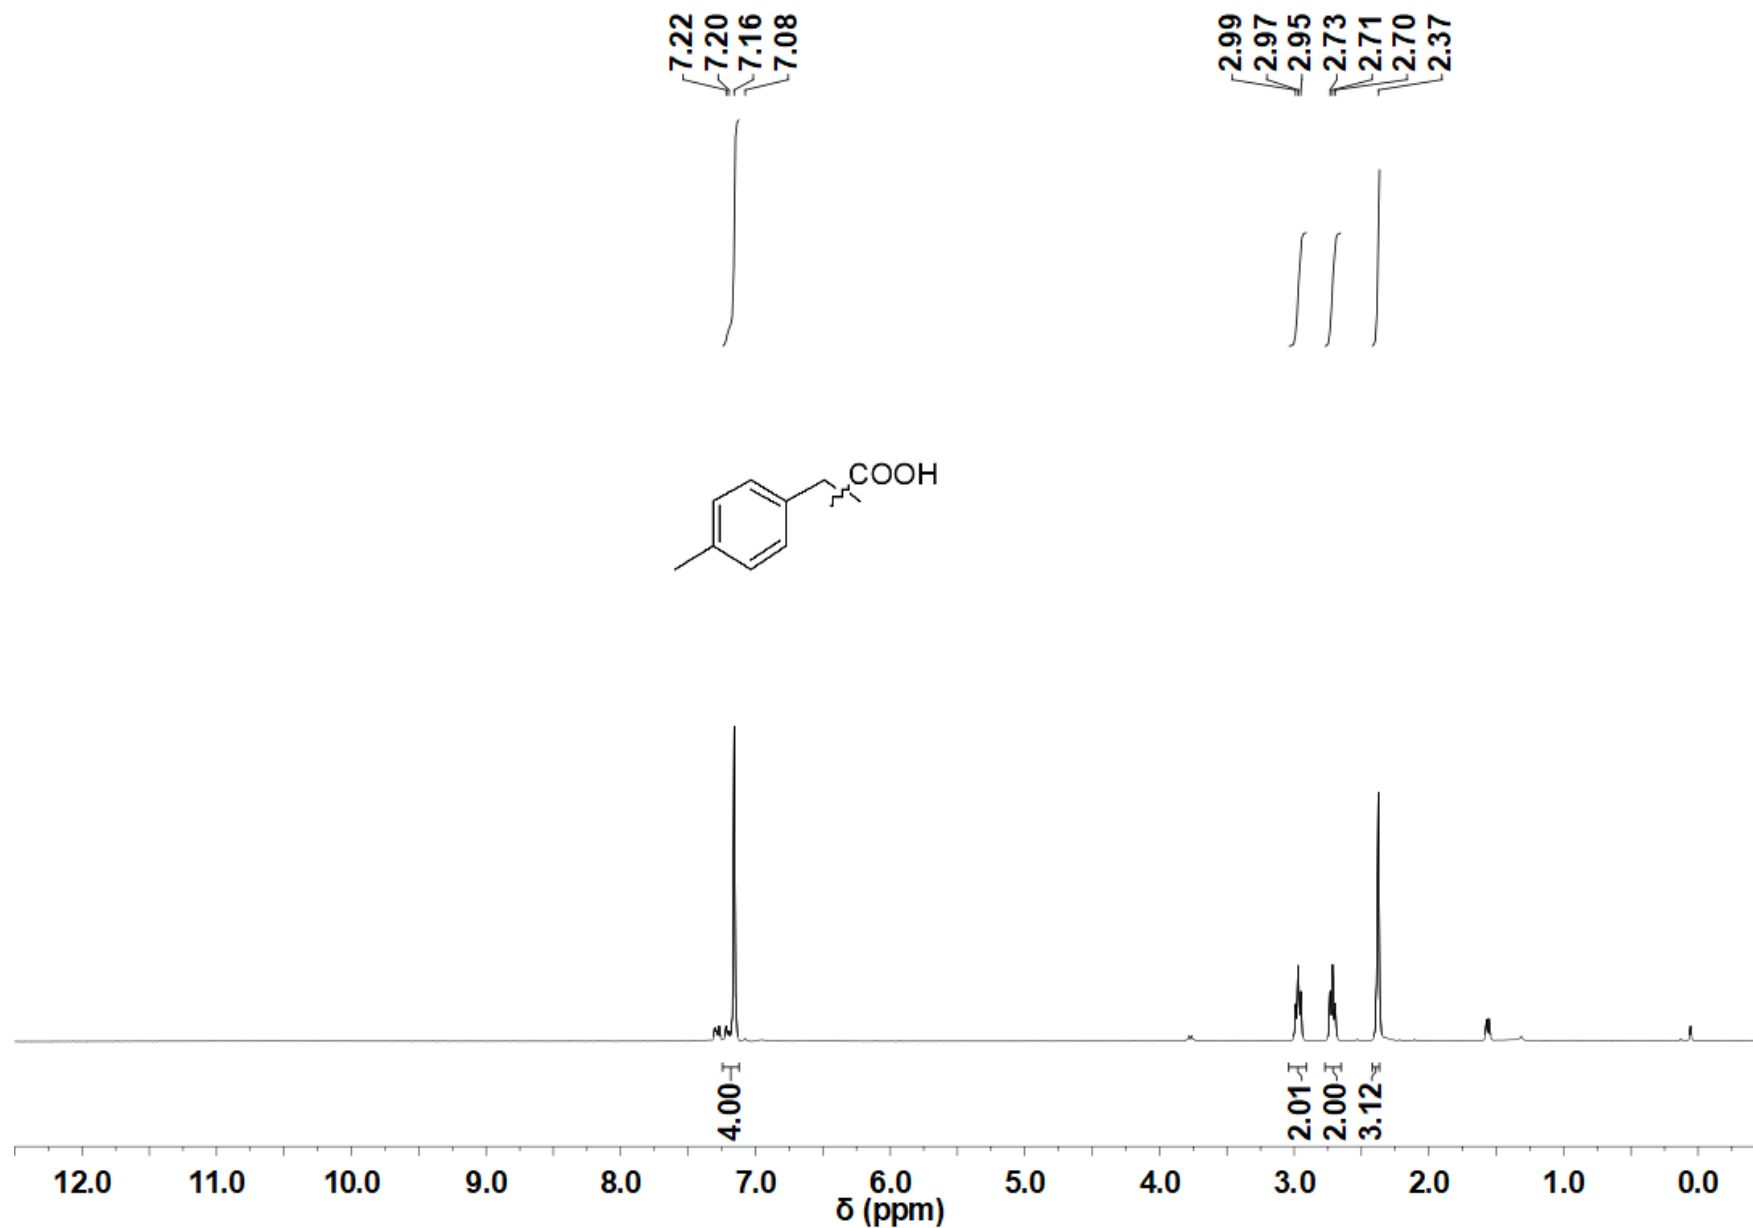



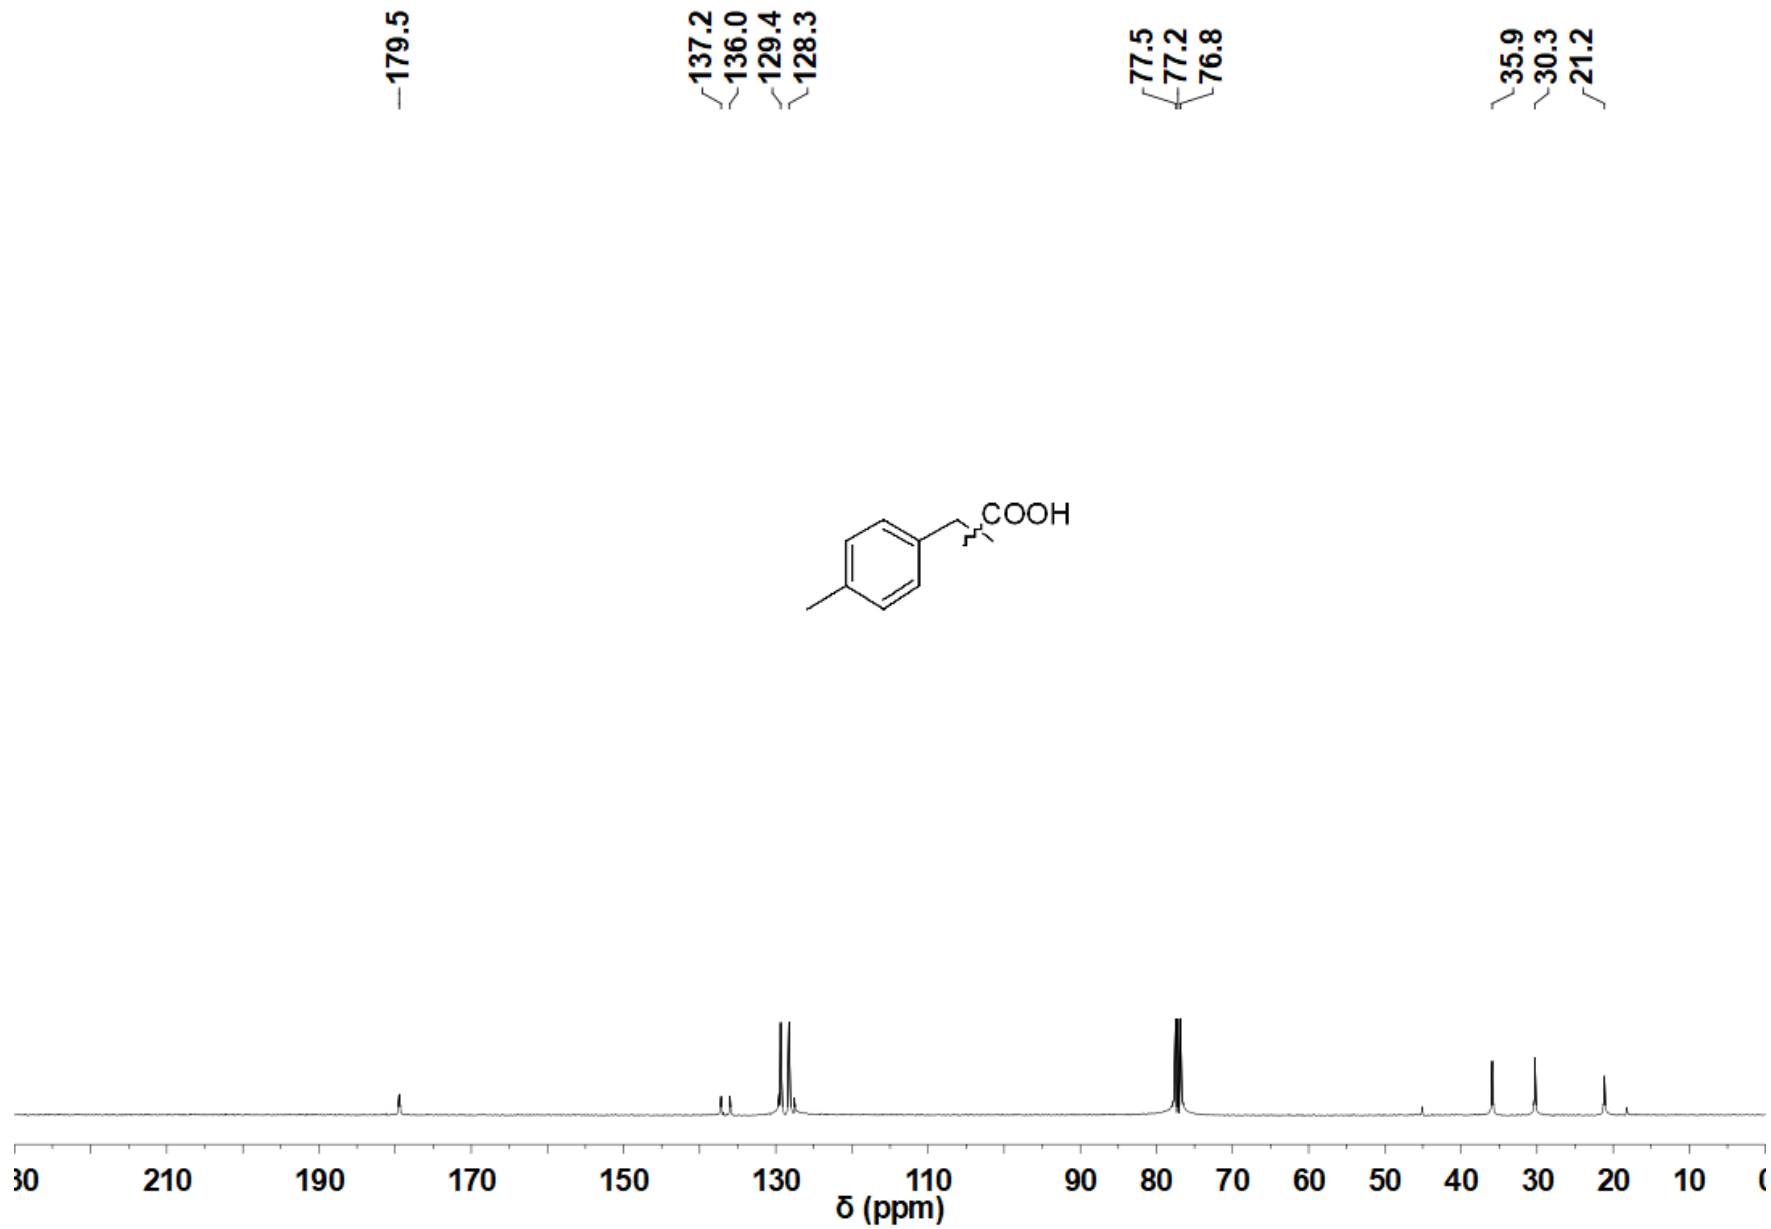

3-(4-fluorophenyl) propionic acid, **3e**  
400 MHz, CDCl<sub>3</sub>

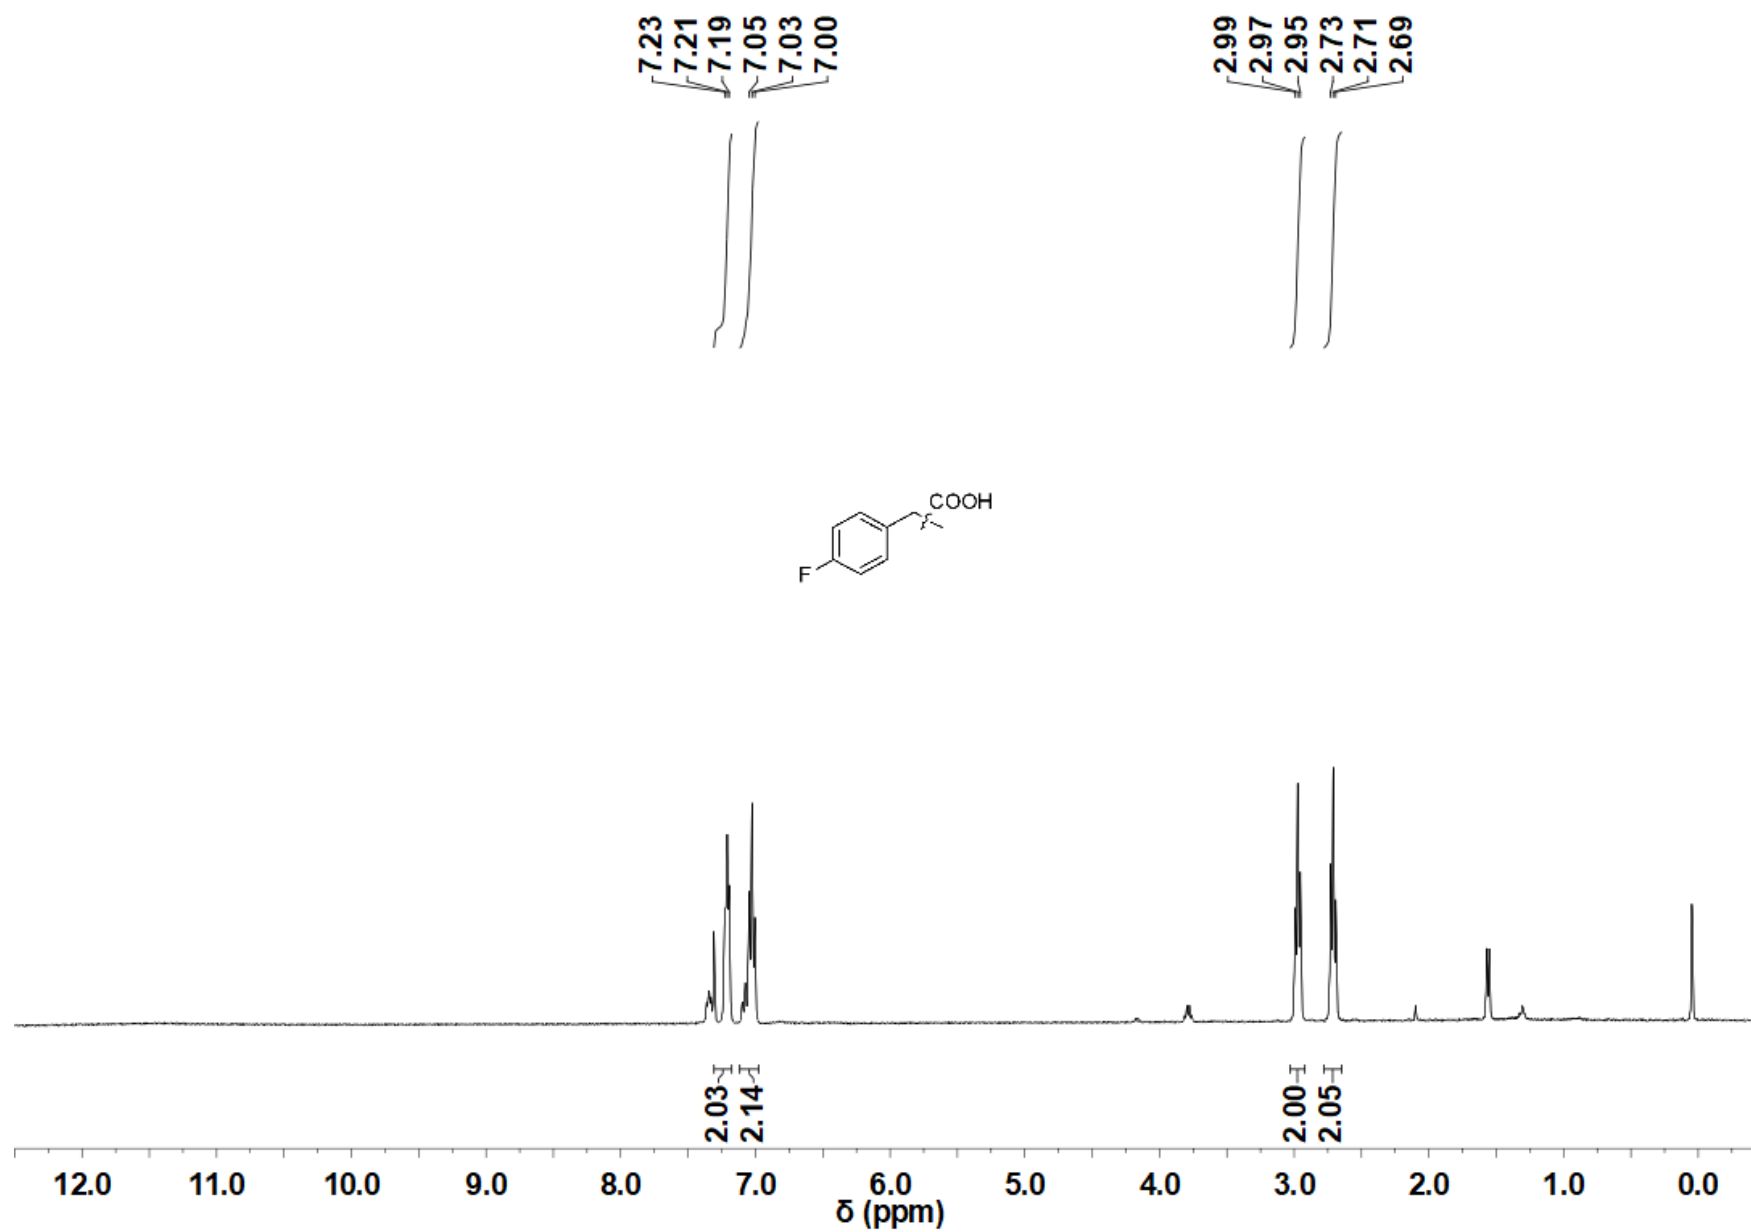

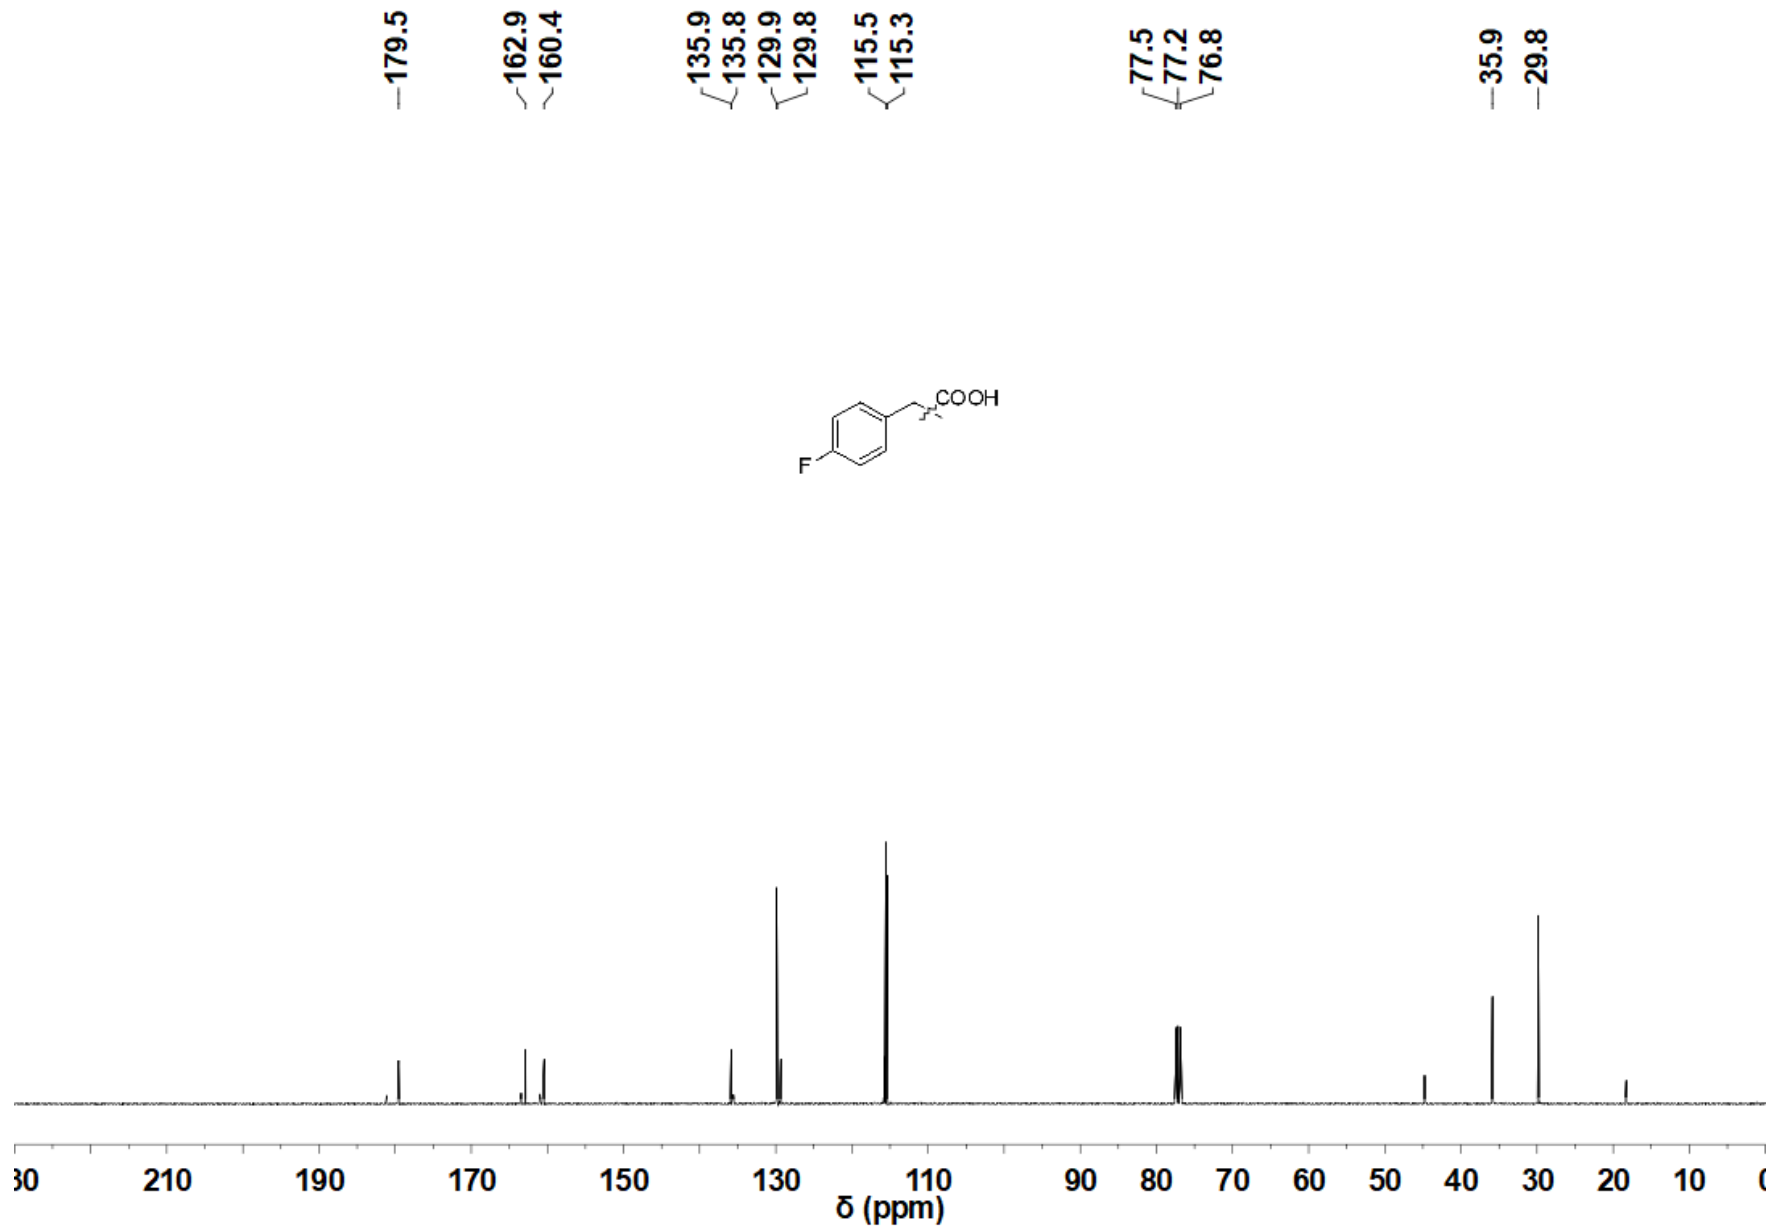

3-(4-chlorophenyl) propionic acid, **3f**  
400 MHz, CDCl<sub>3</sub>

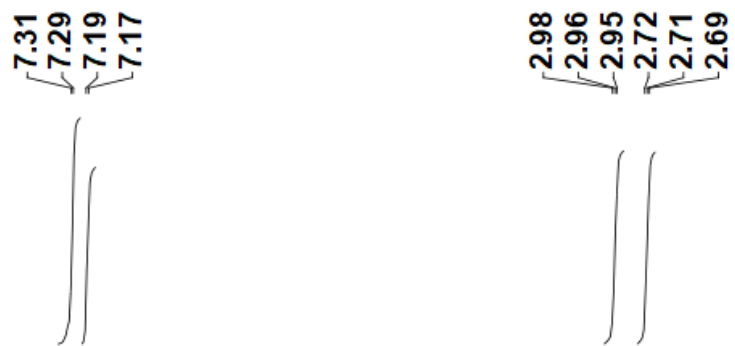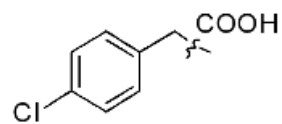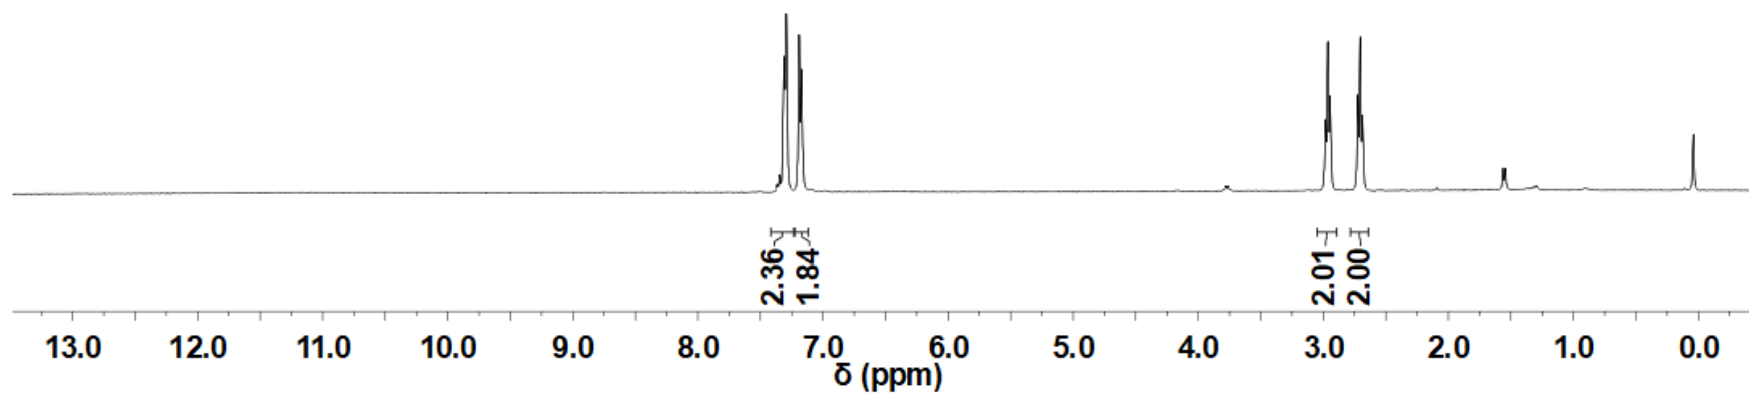

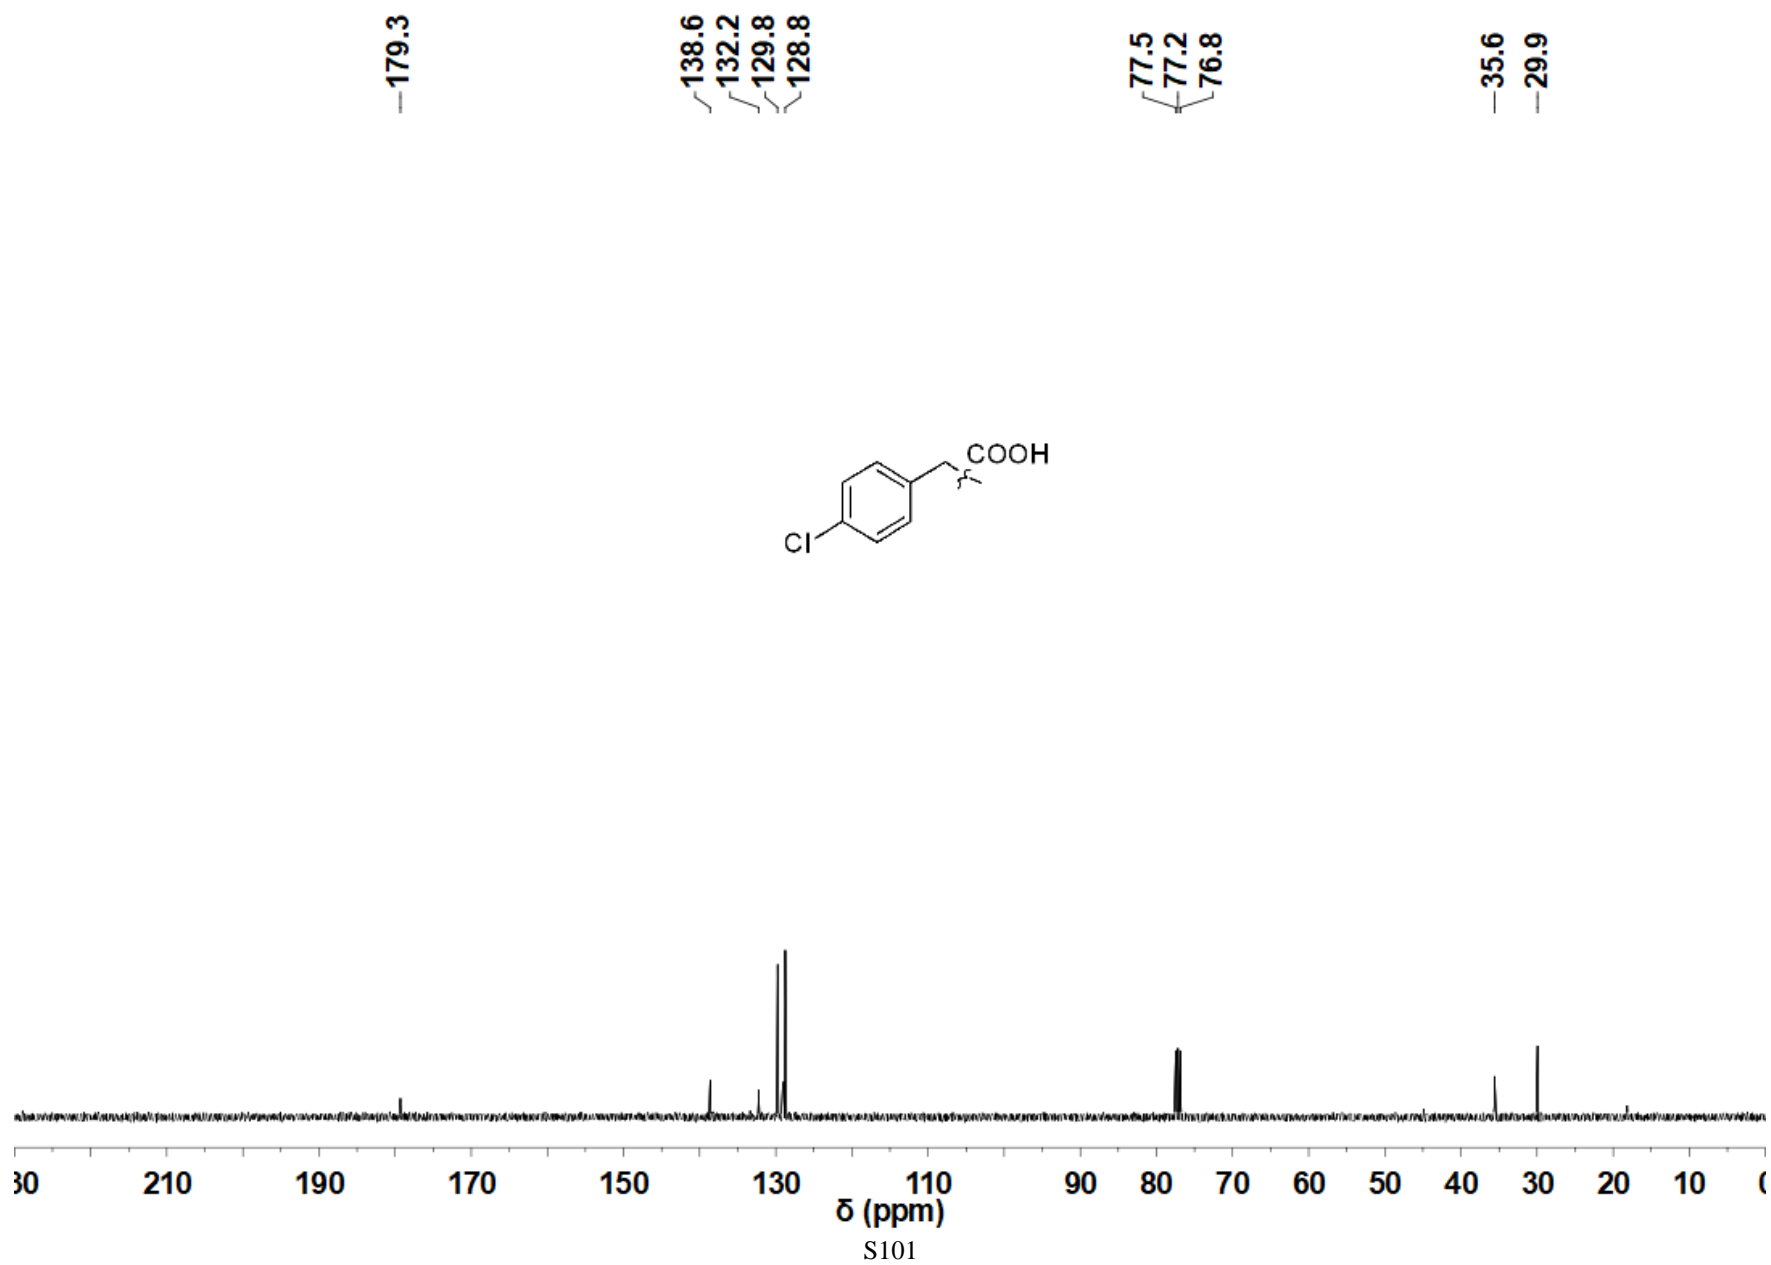

3-(4-bromophenyl) propanoic acid, **3g**  
400 MHz, CDCl<sub>3</sub>

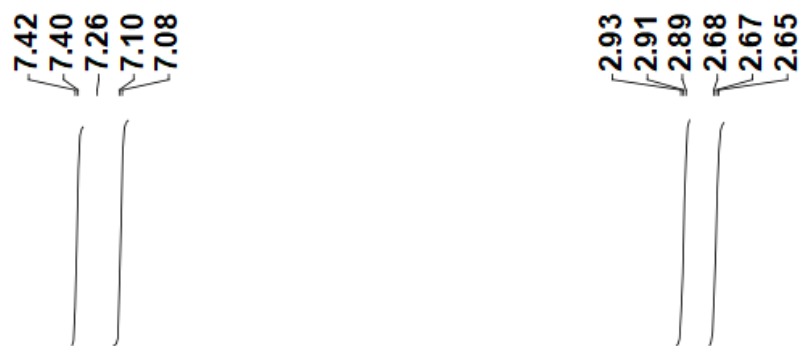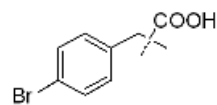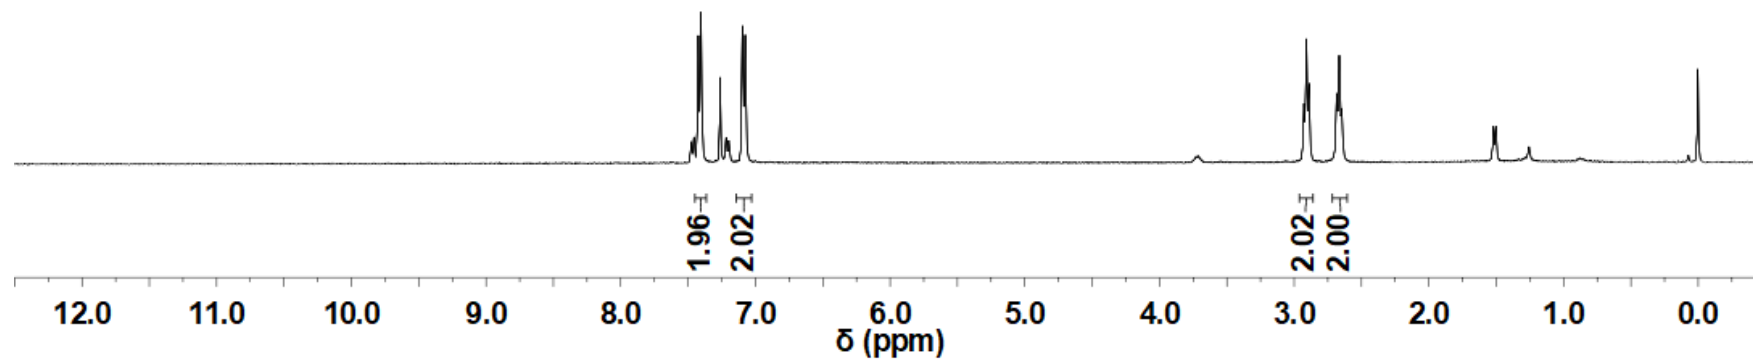

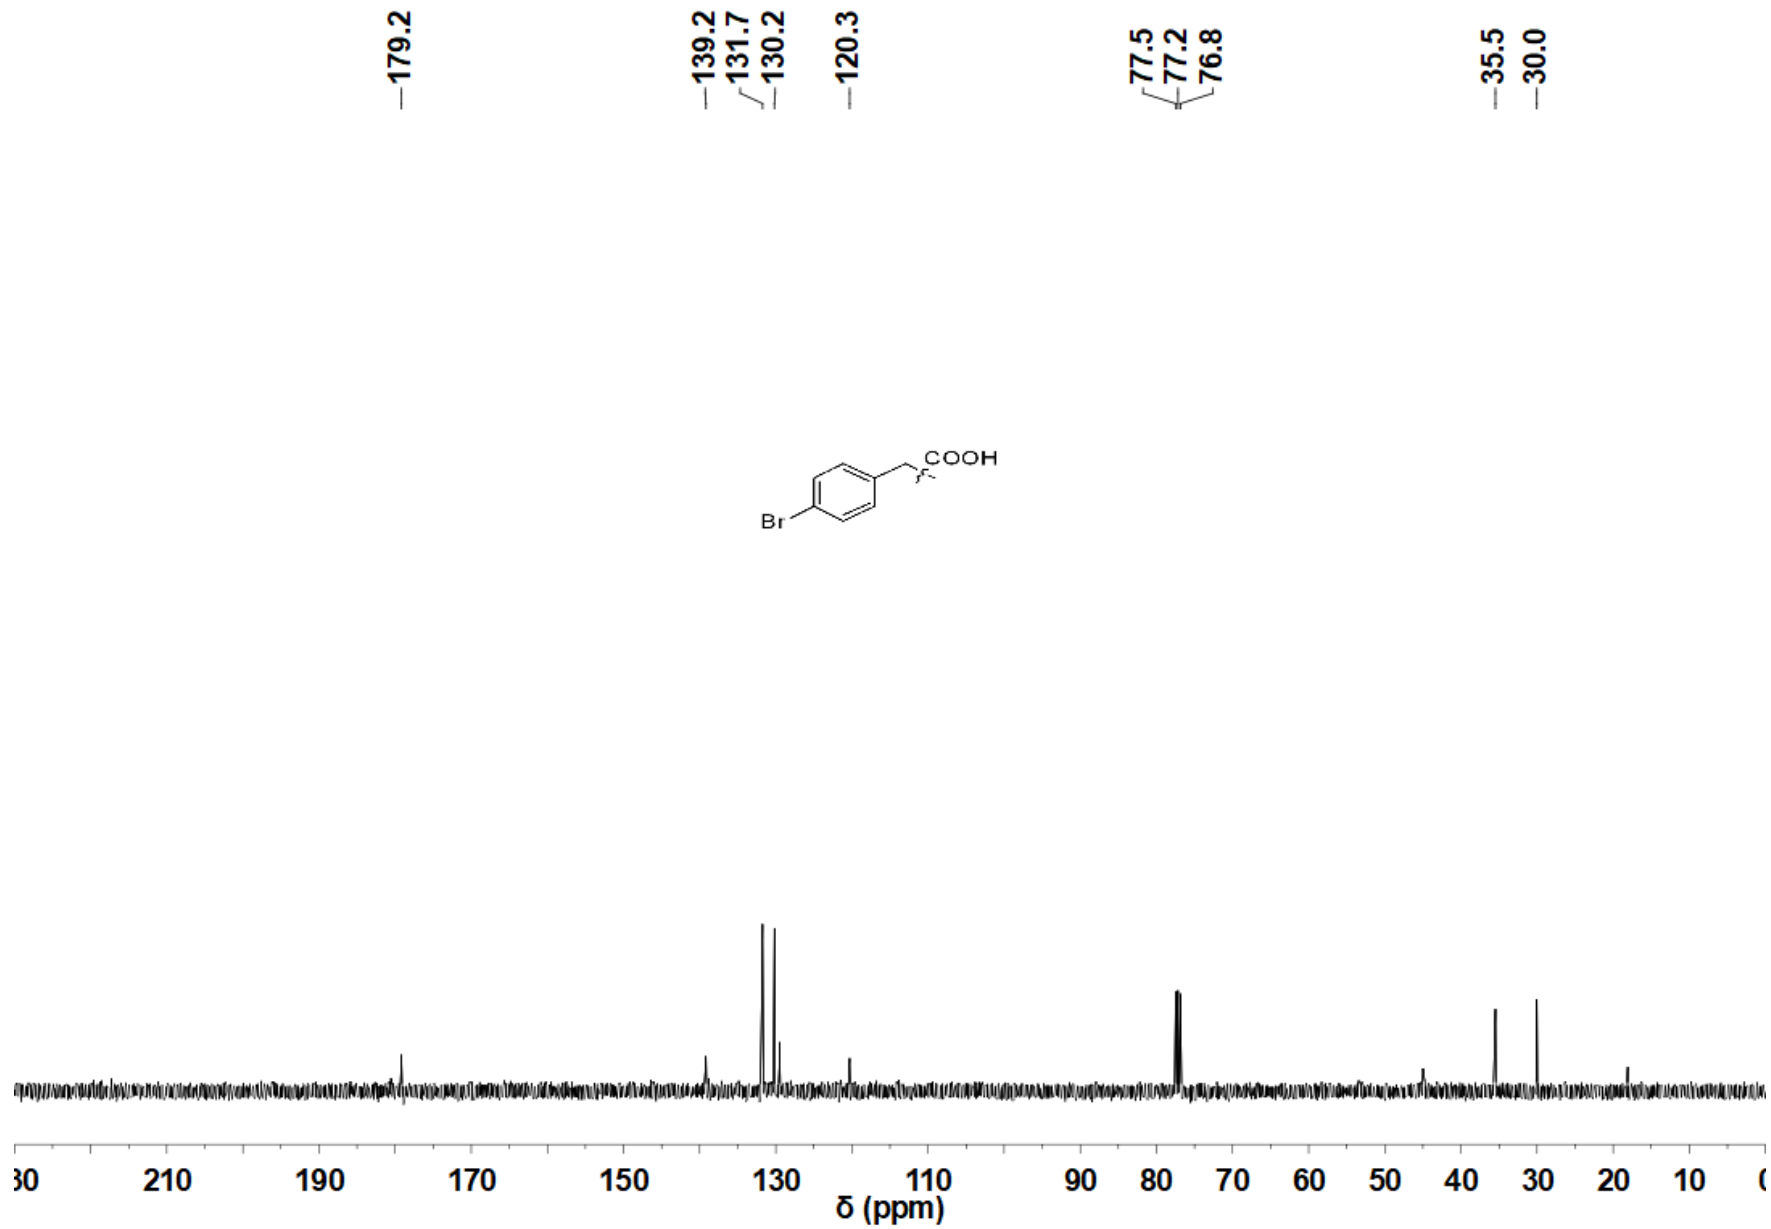

3-(4-trifluoromethylphenyl) propanoic acid, **3i**  
400 MHz, CDCl<sub>3</sub>

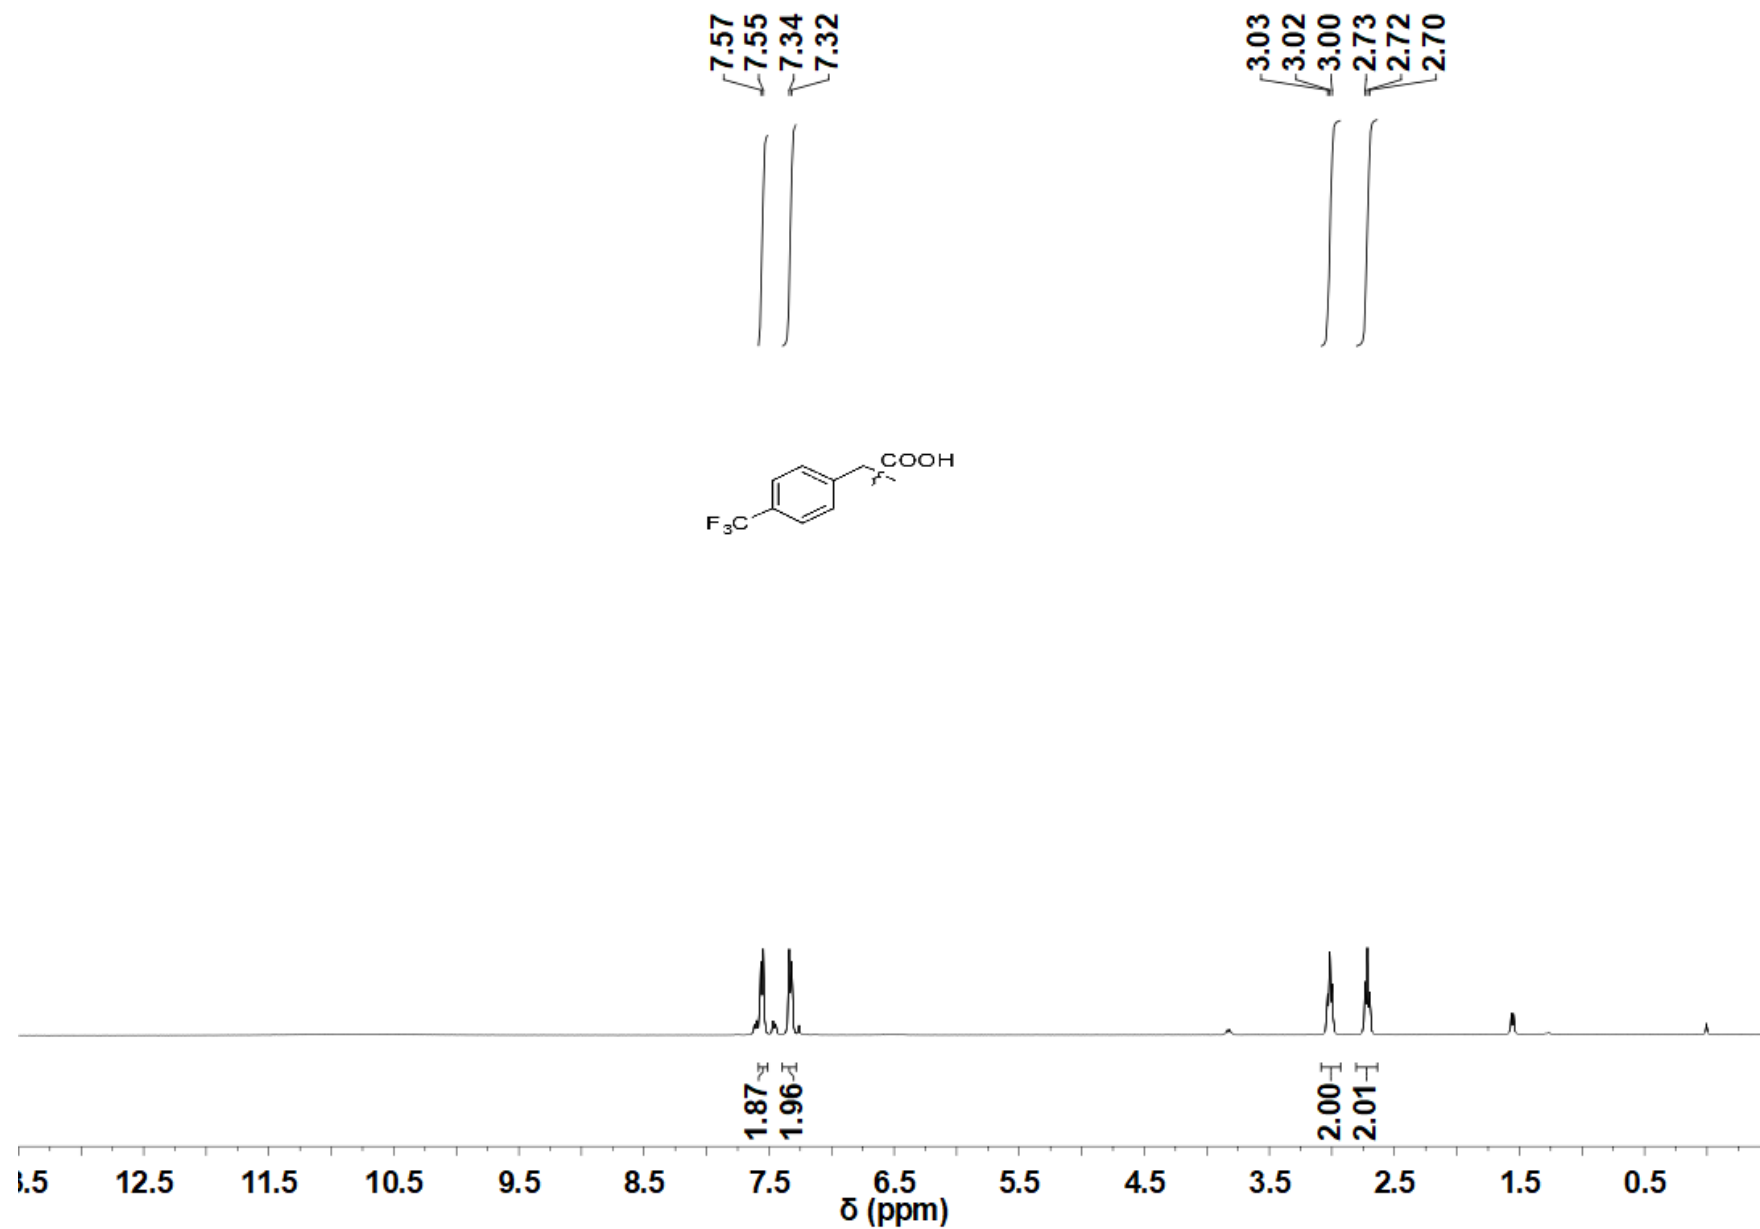



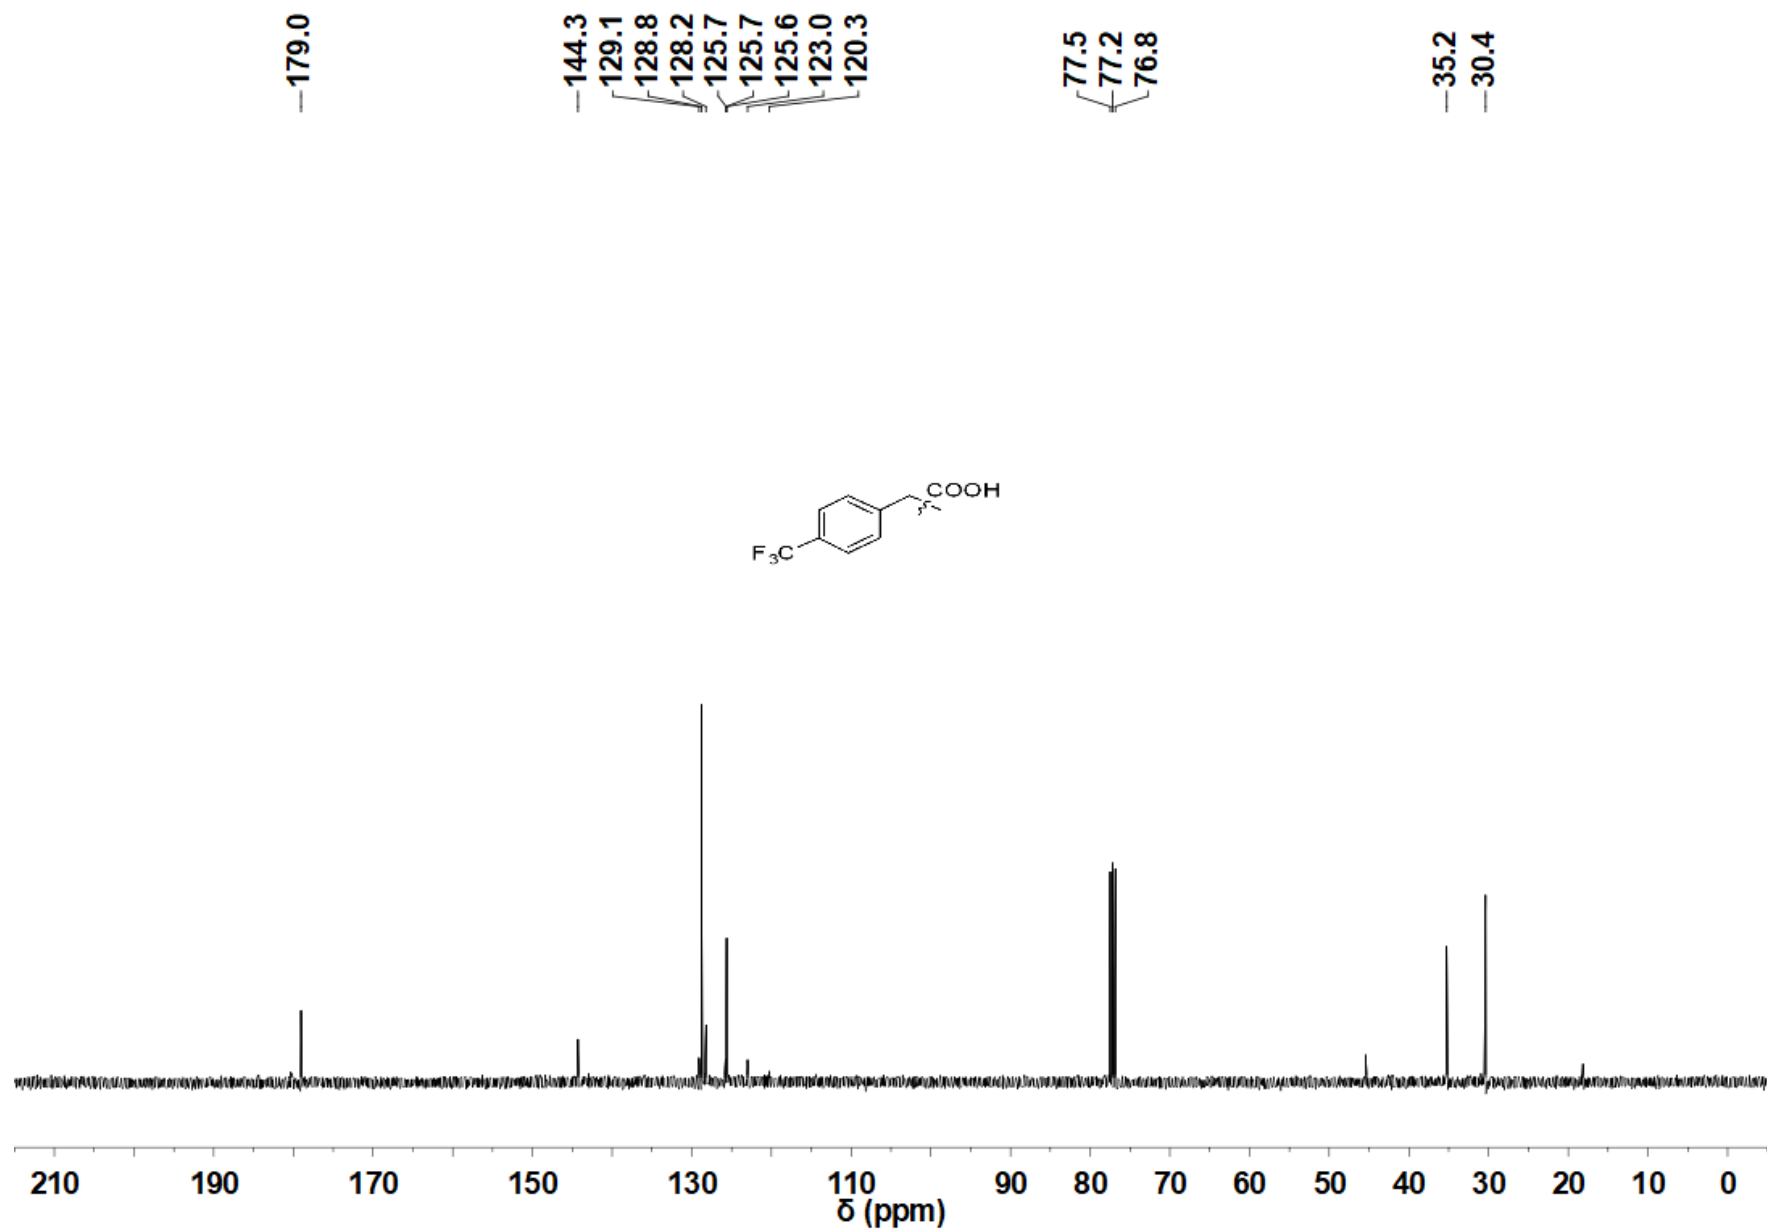

3-(4-isobutylphenyl) propionic acid, **31**  
400 MHz, CDCl<sub>3</sub>

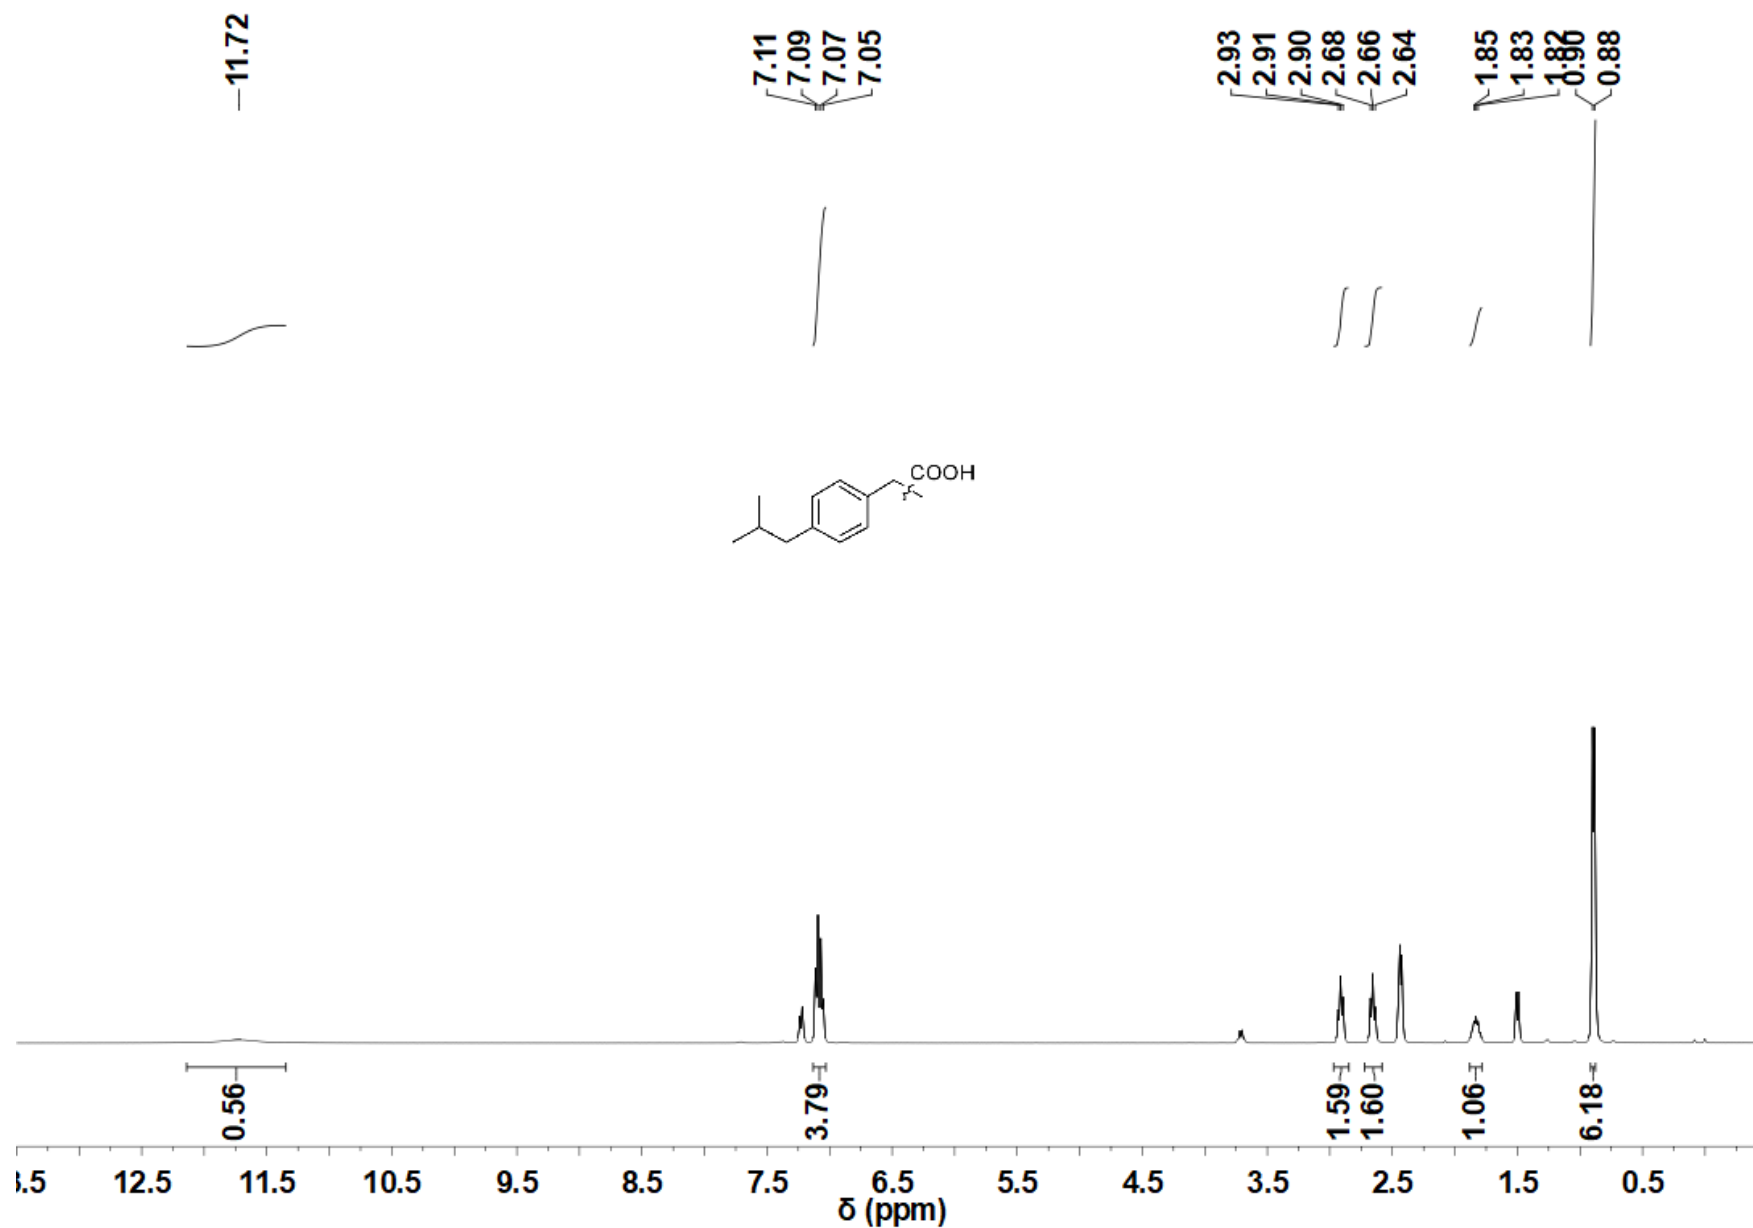

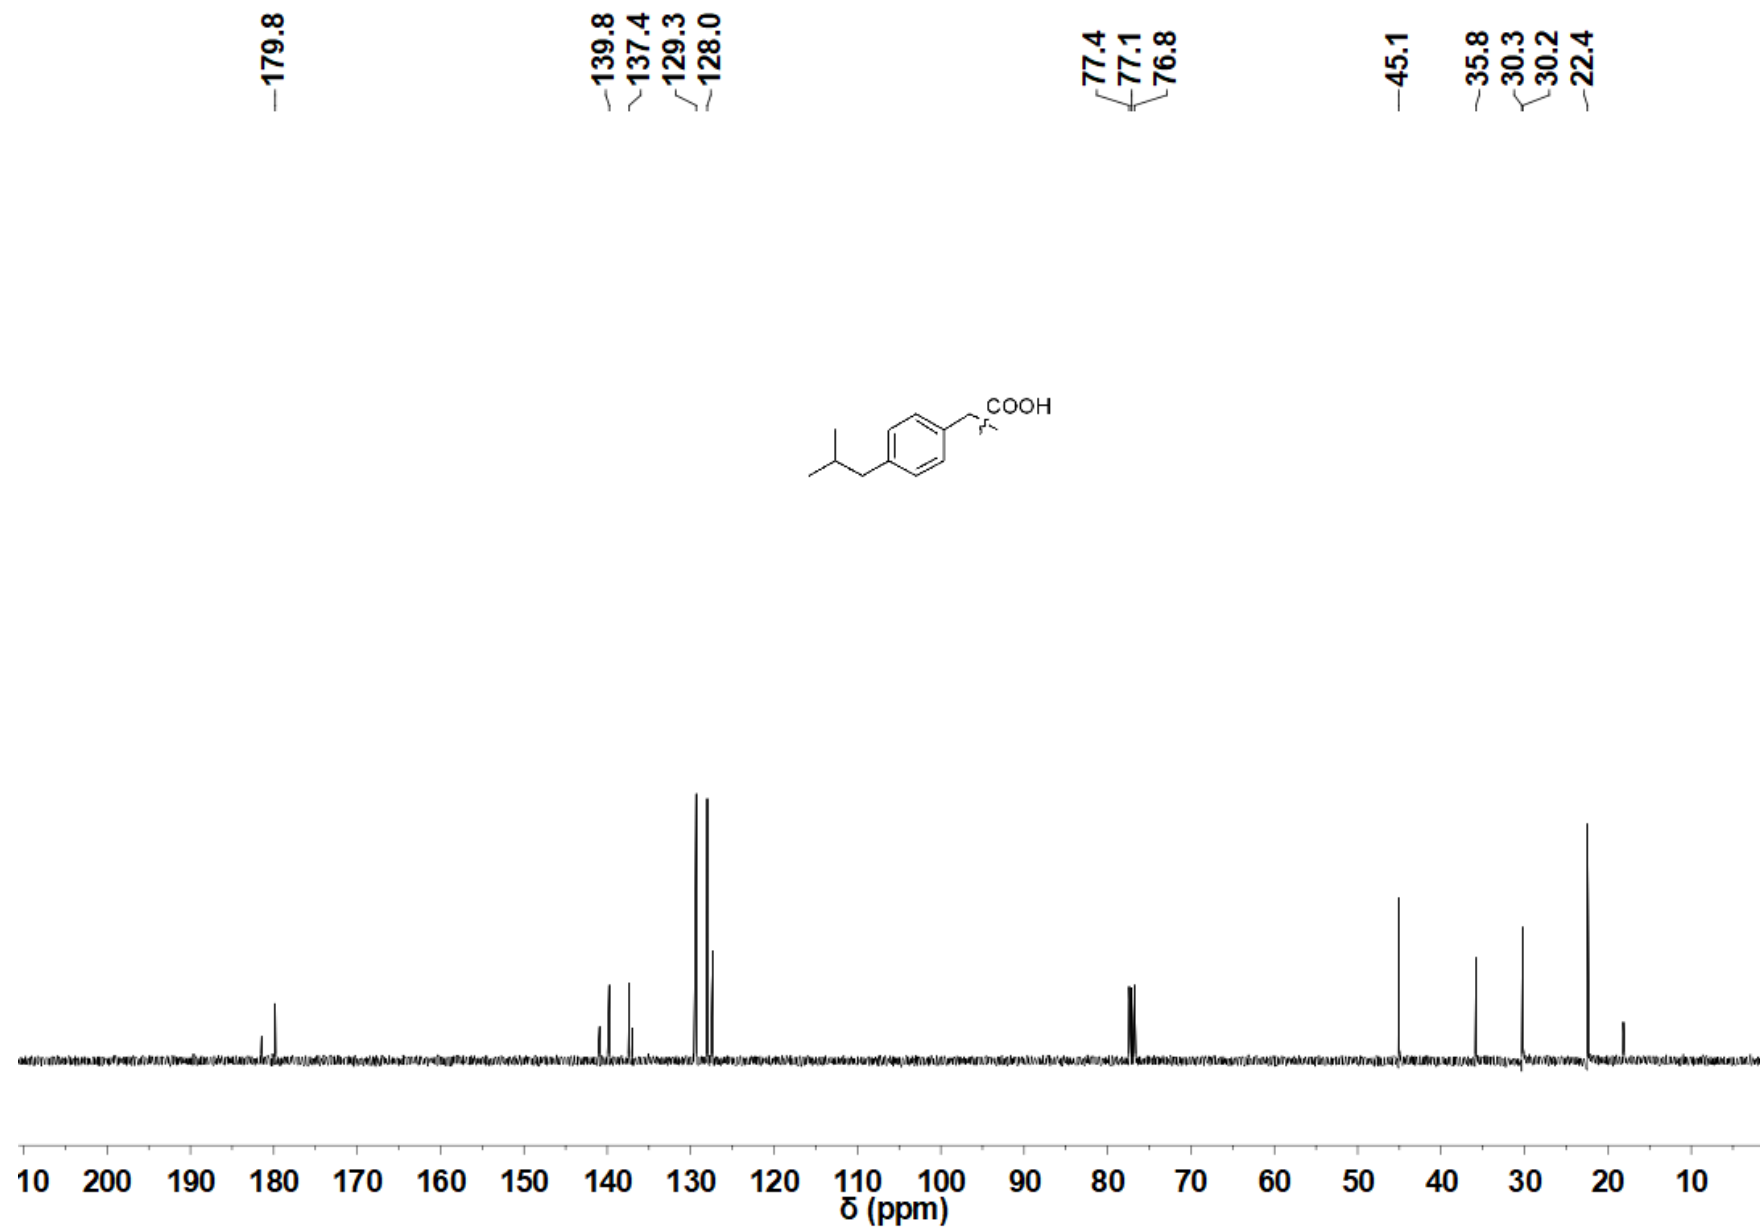

3-(3-methylphenyl) propanoic acid, **3m**  
400 MHz, CDCl<sub>3</sub>

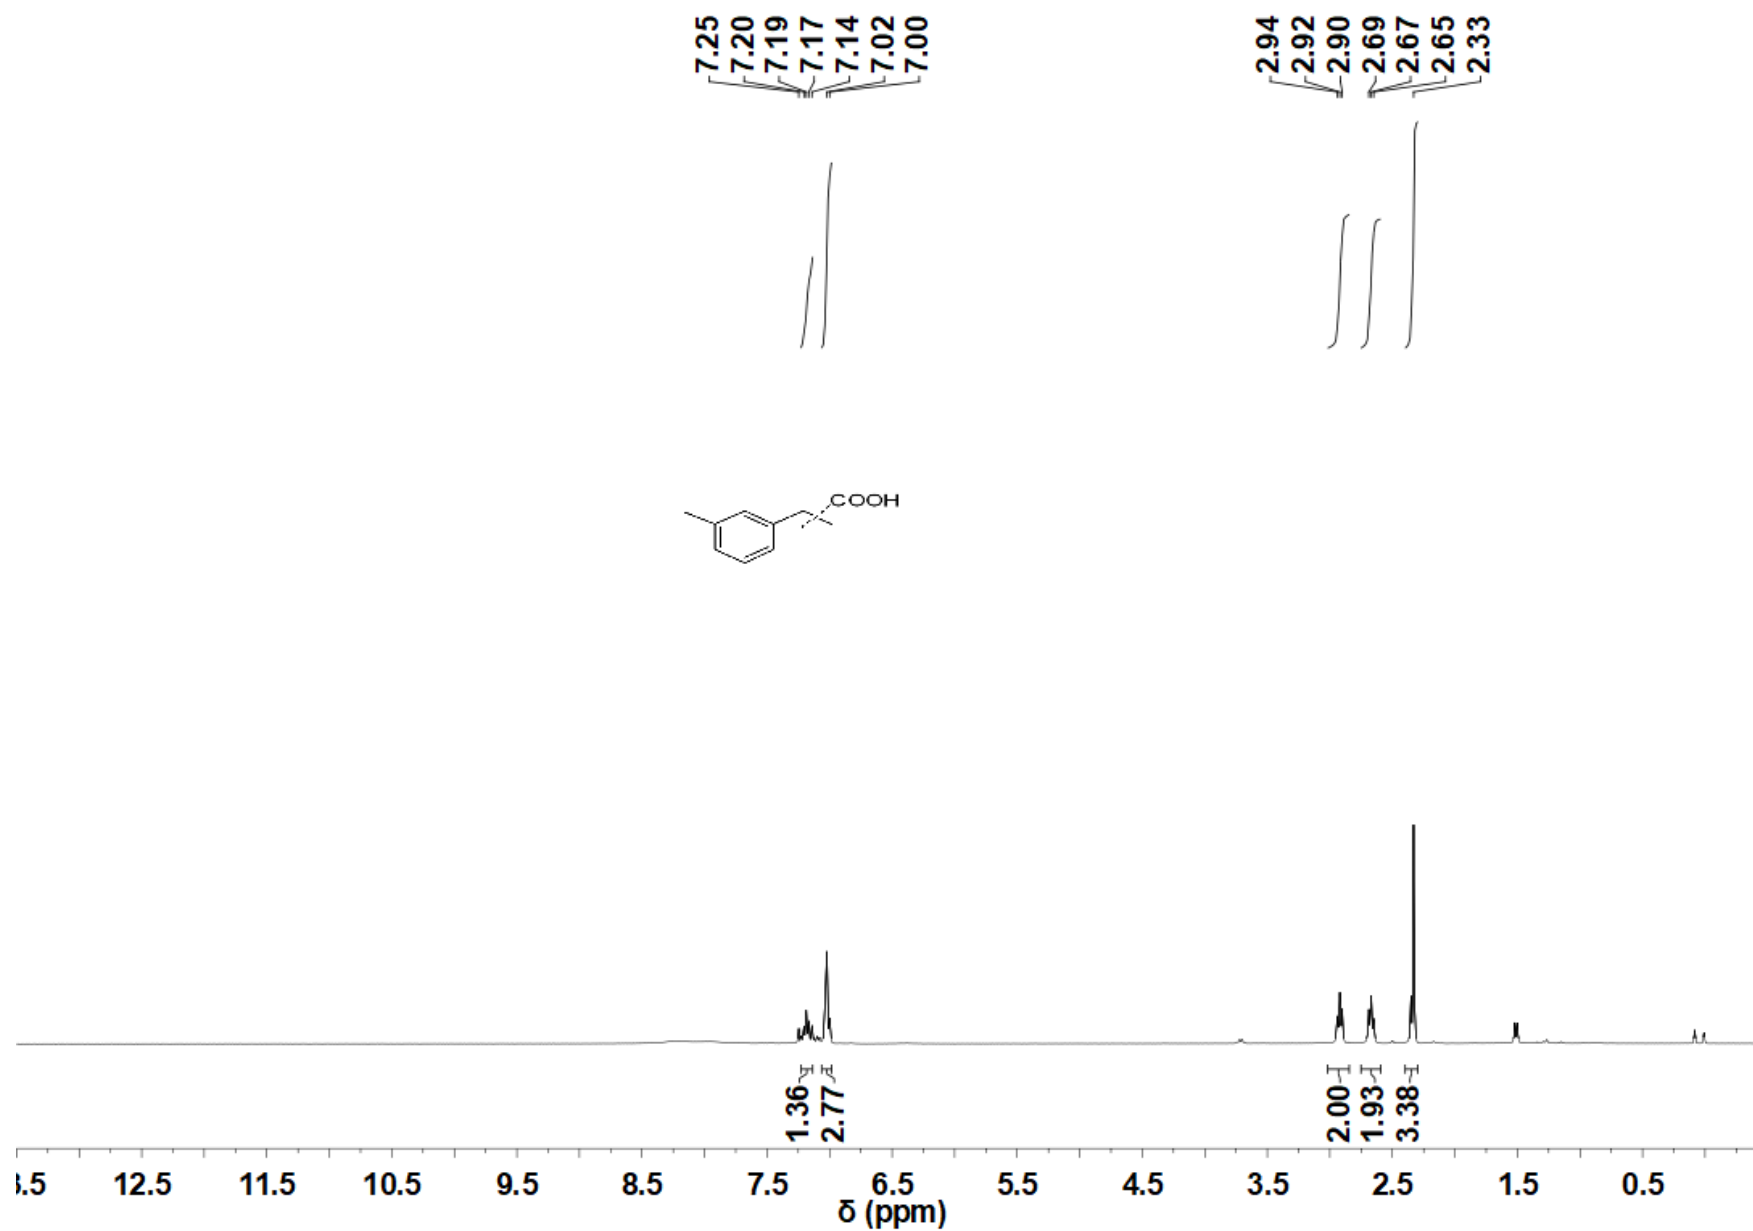

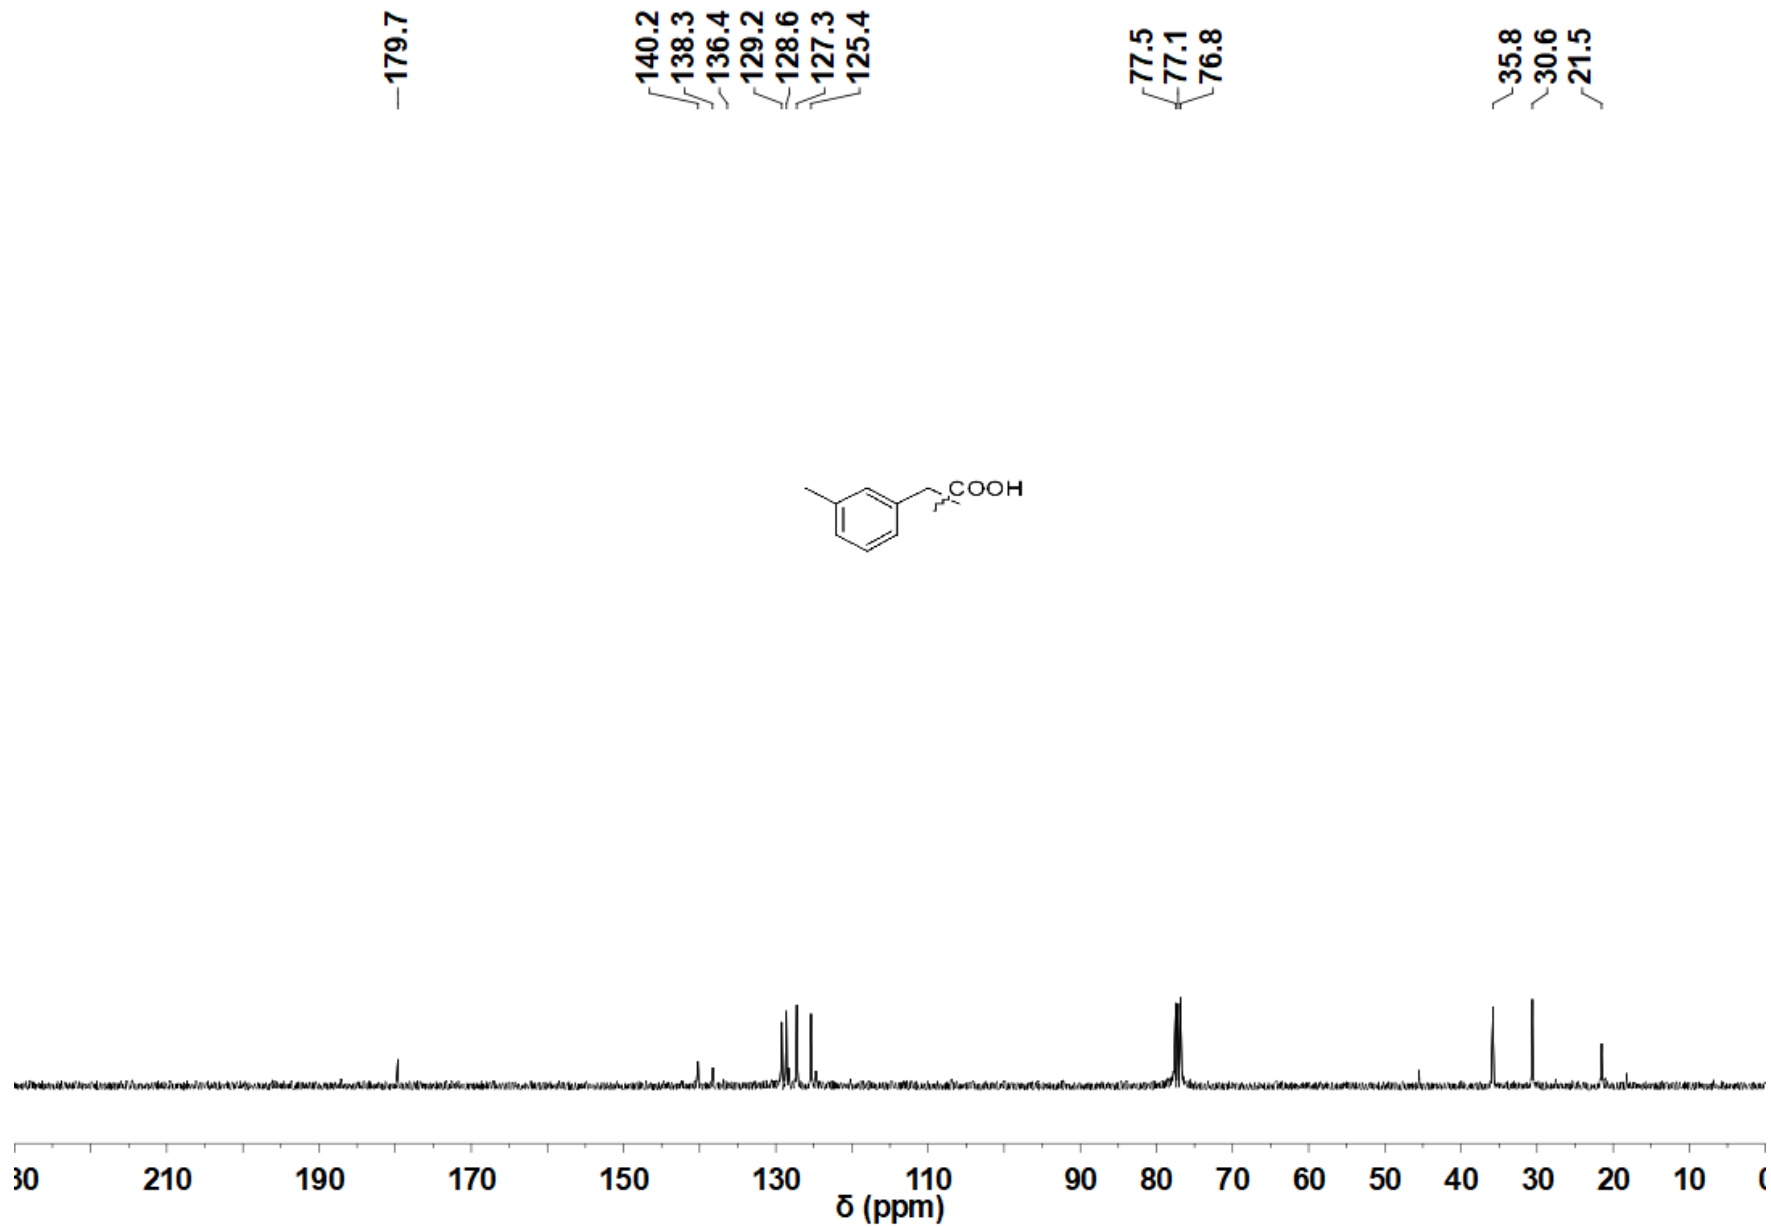

3-(3-methoxyphenyl) propanoic acid, **3n**  
400 MHz, CDCl<sub>3</sub>

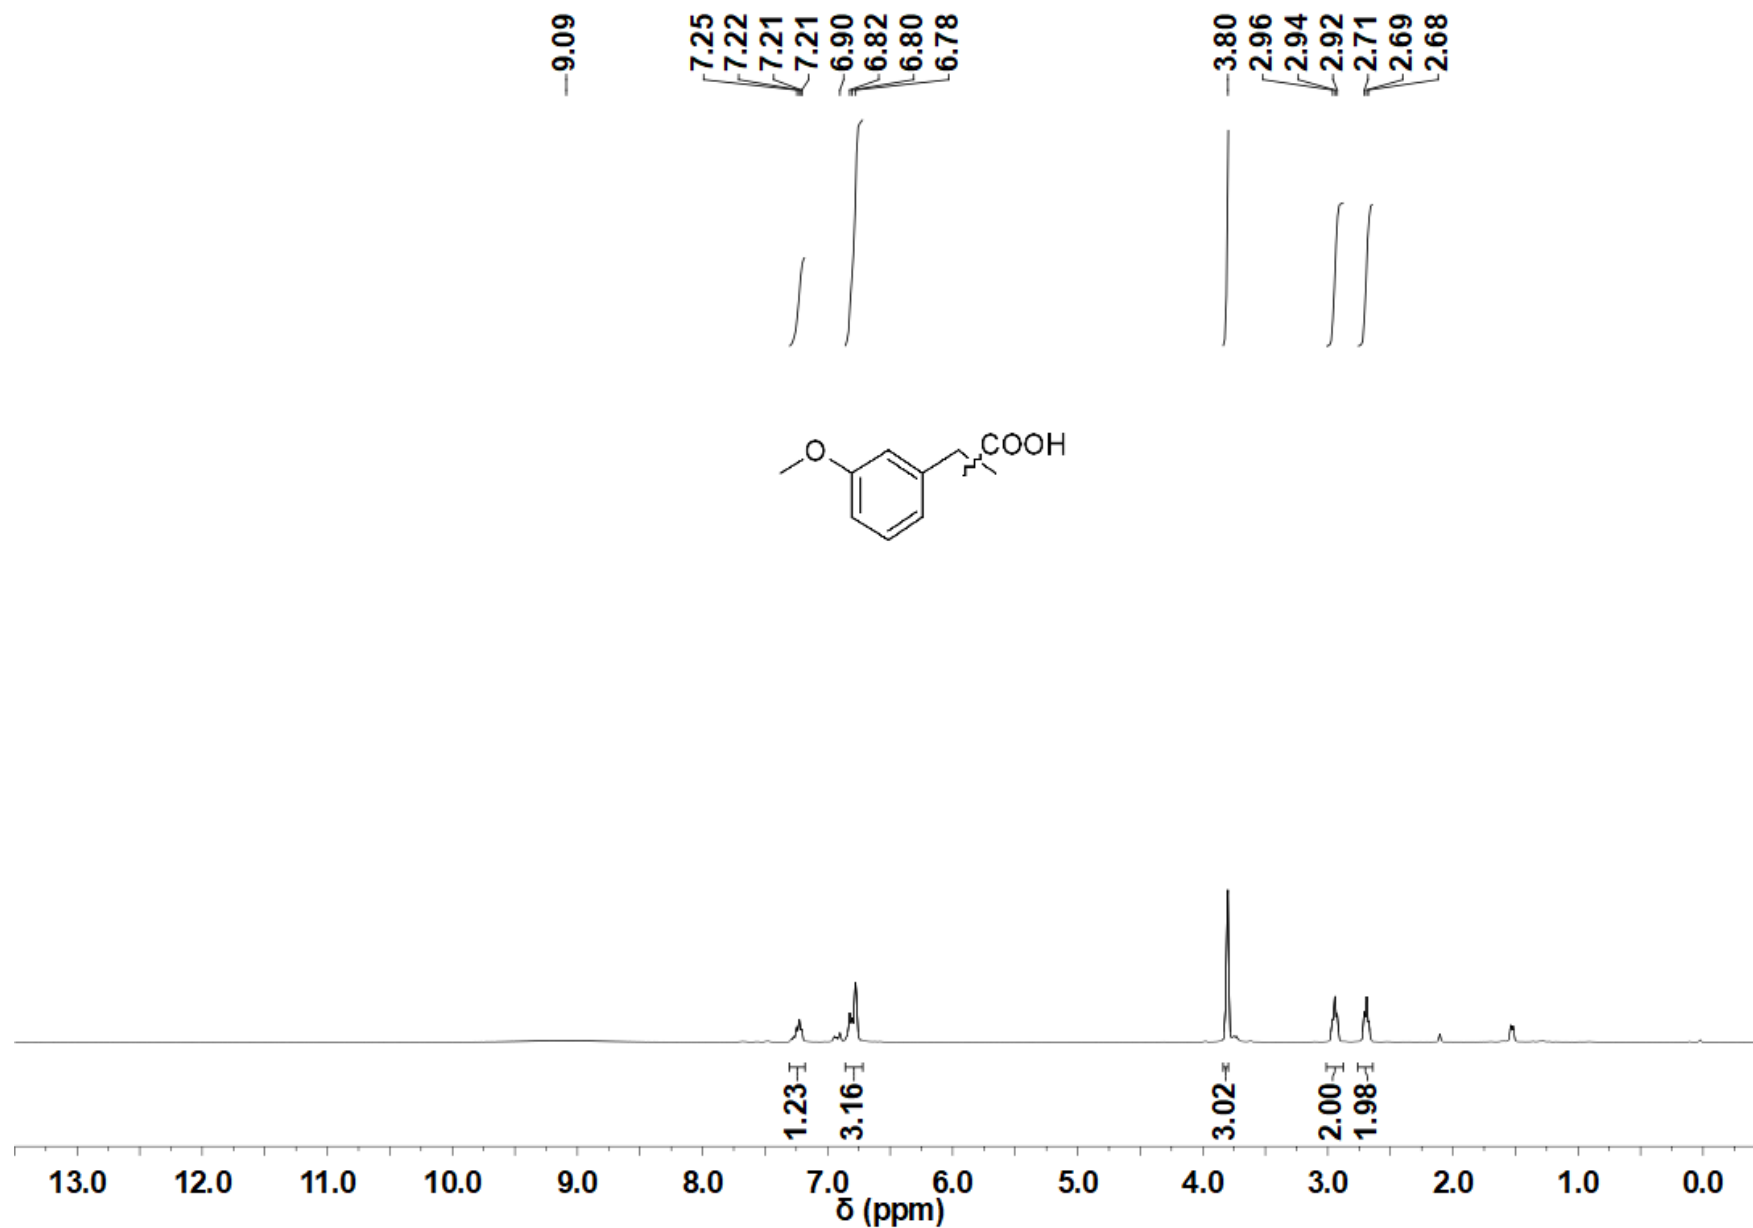

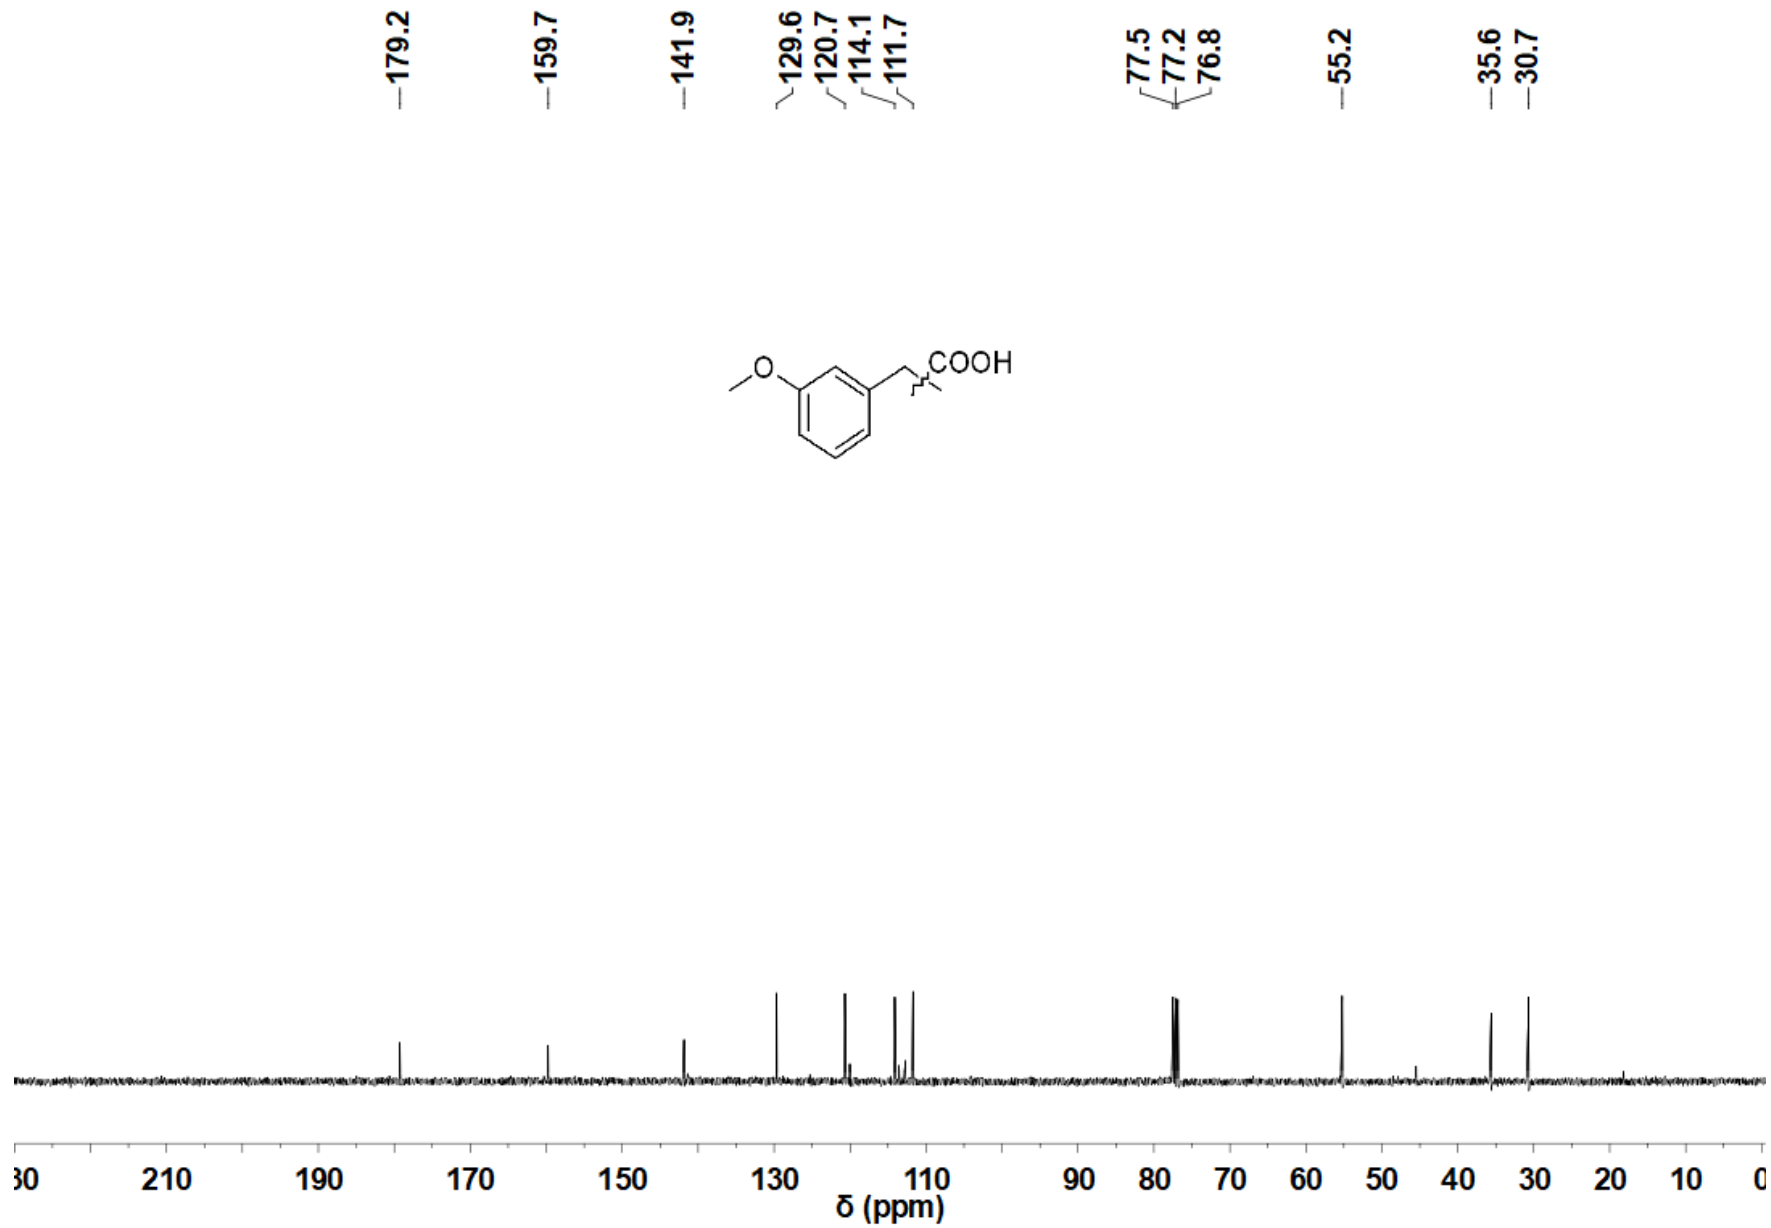

3-(2-methylphenyl) propanoic acid, **3p**  
400 MHz, CDCl<sub>3</sub>

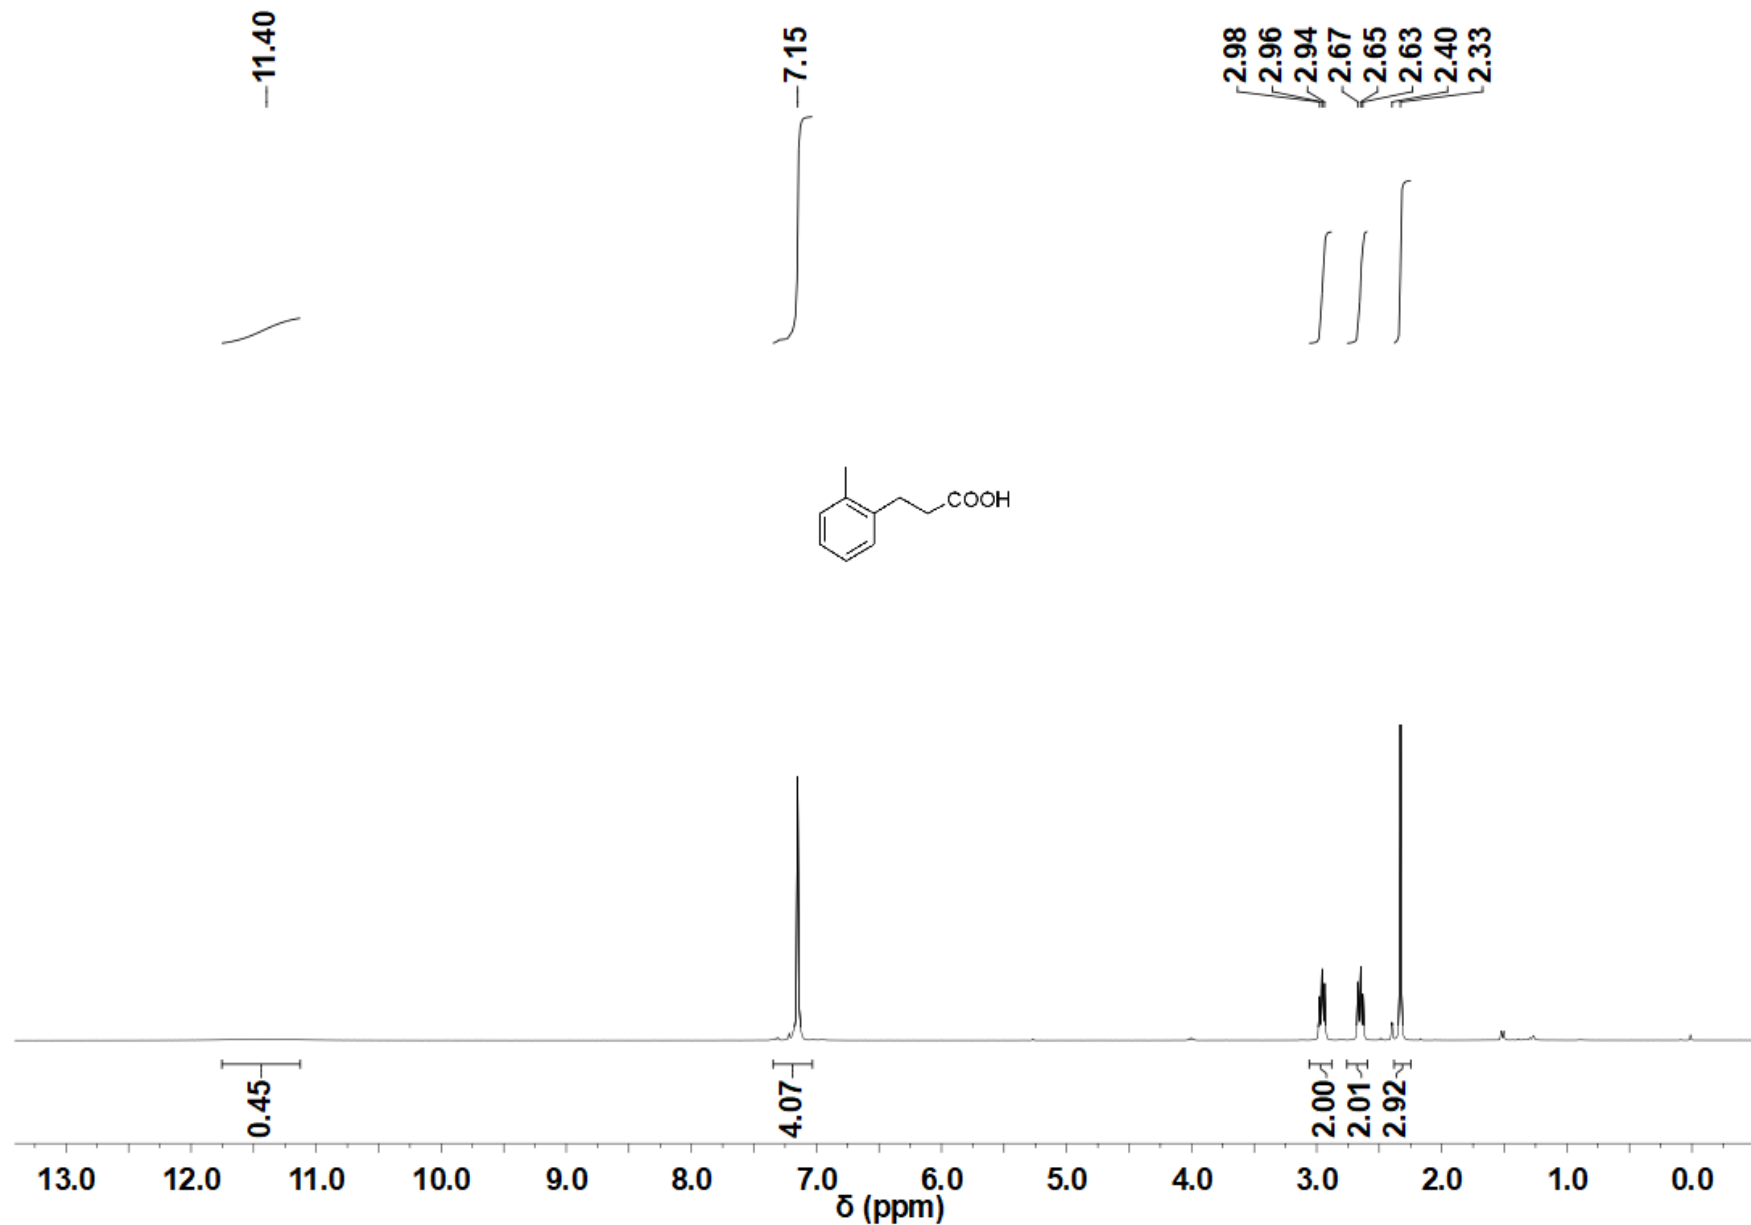



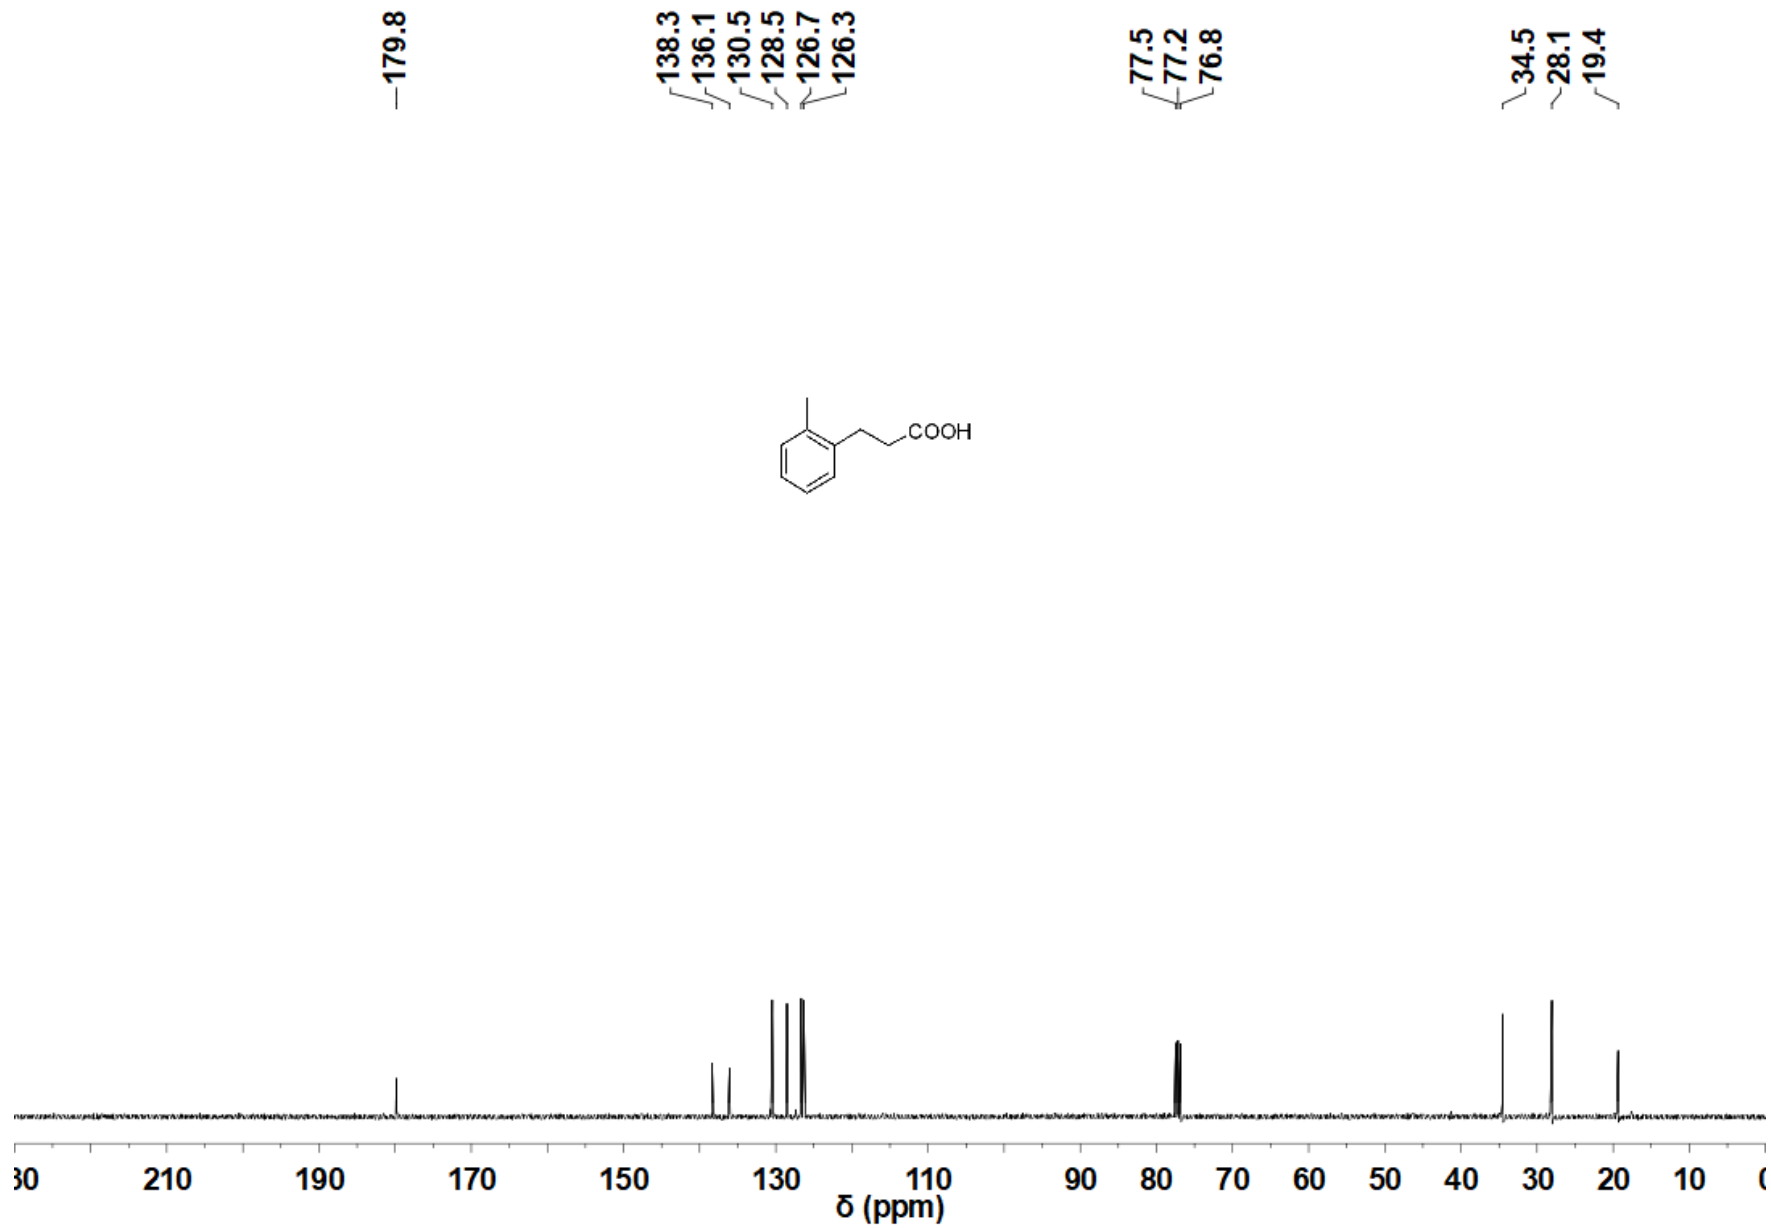

3-(2-methoxyphenyl) propanoic acid, **3q**  
400 MHz, CDCl<sub>3</sub>

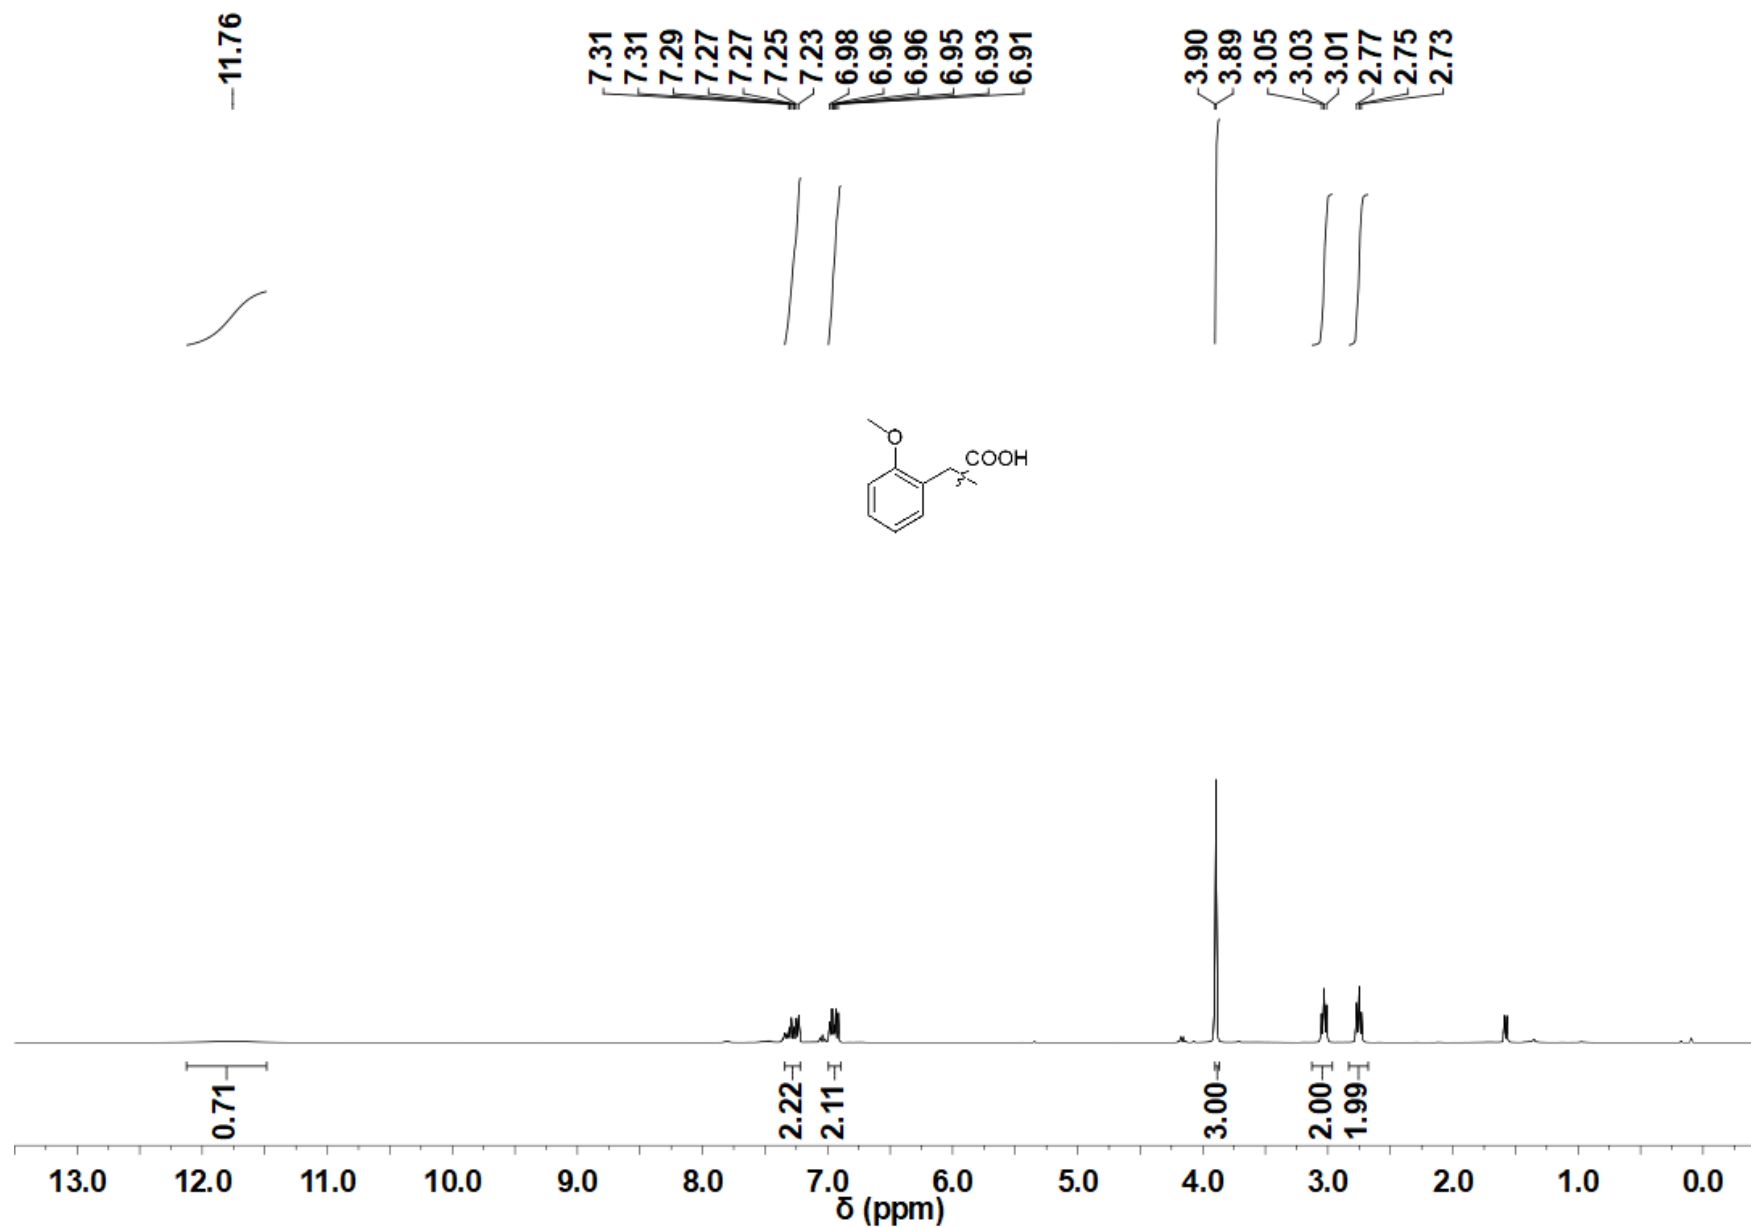

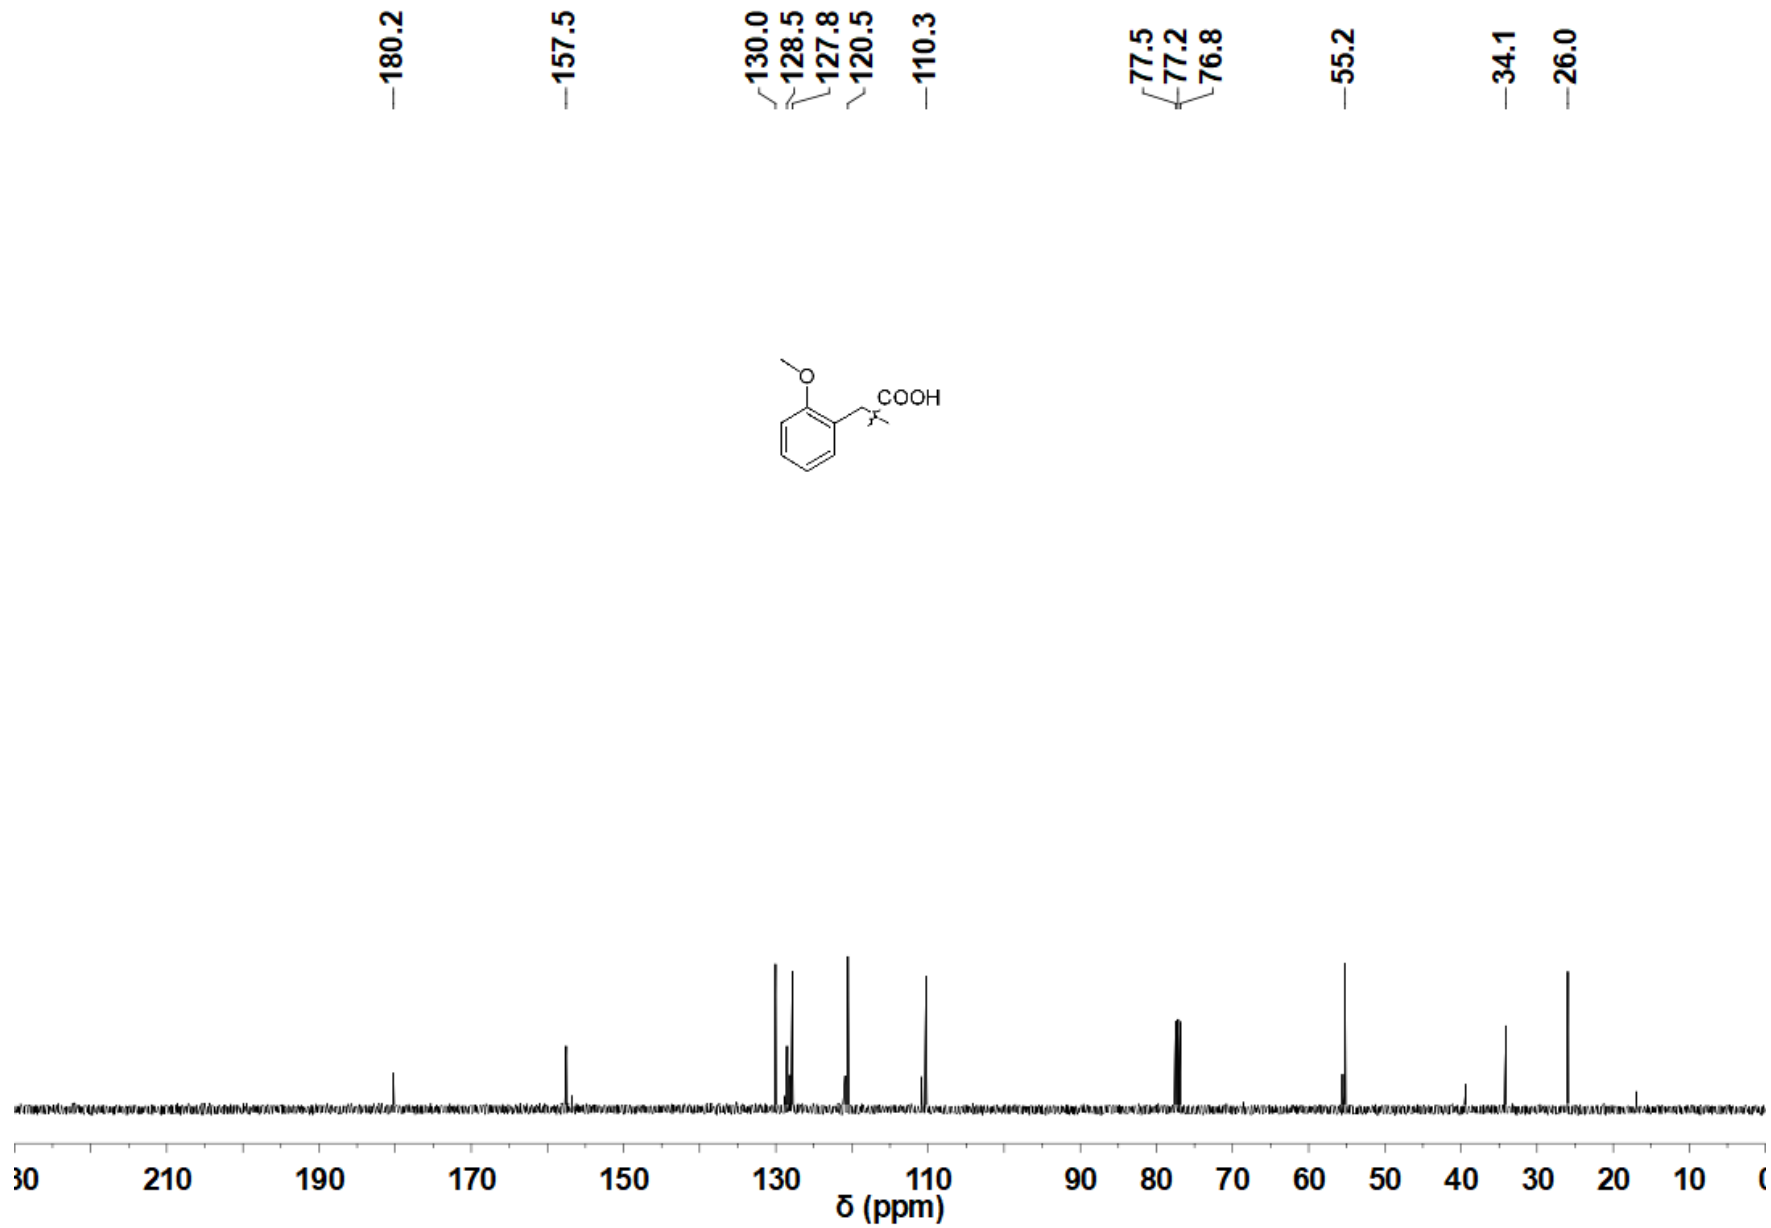

3-(2-chlorophenyl) propionic acid, **3s**  
400 MHz, CDCl<sub>3</sub>

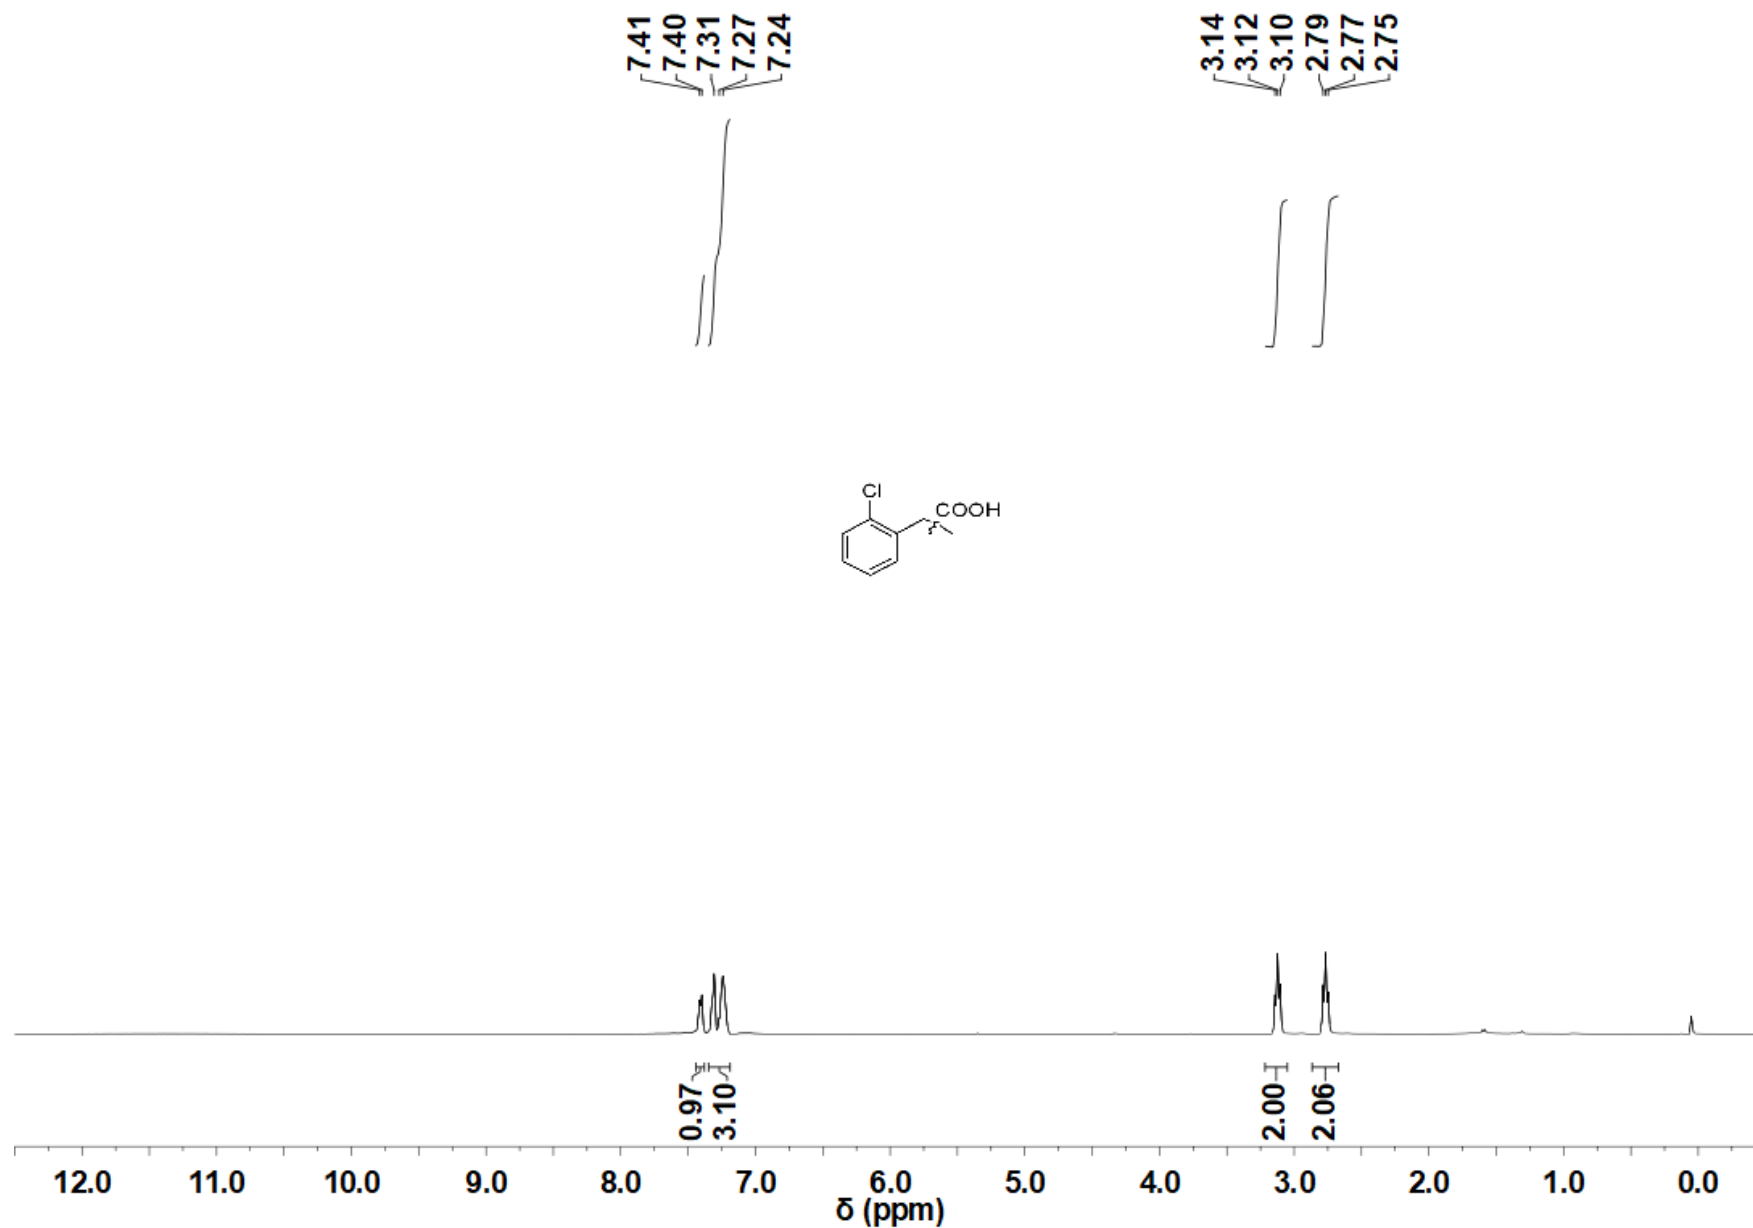

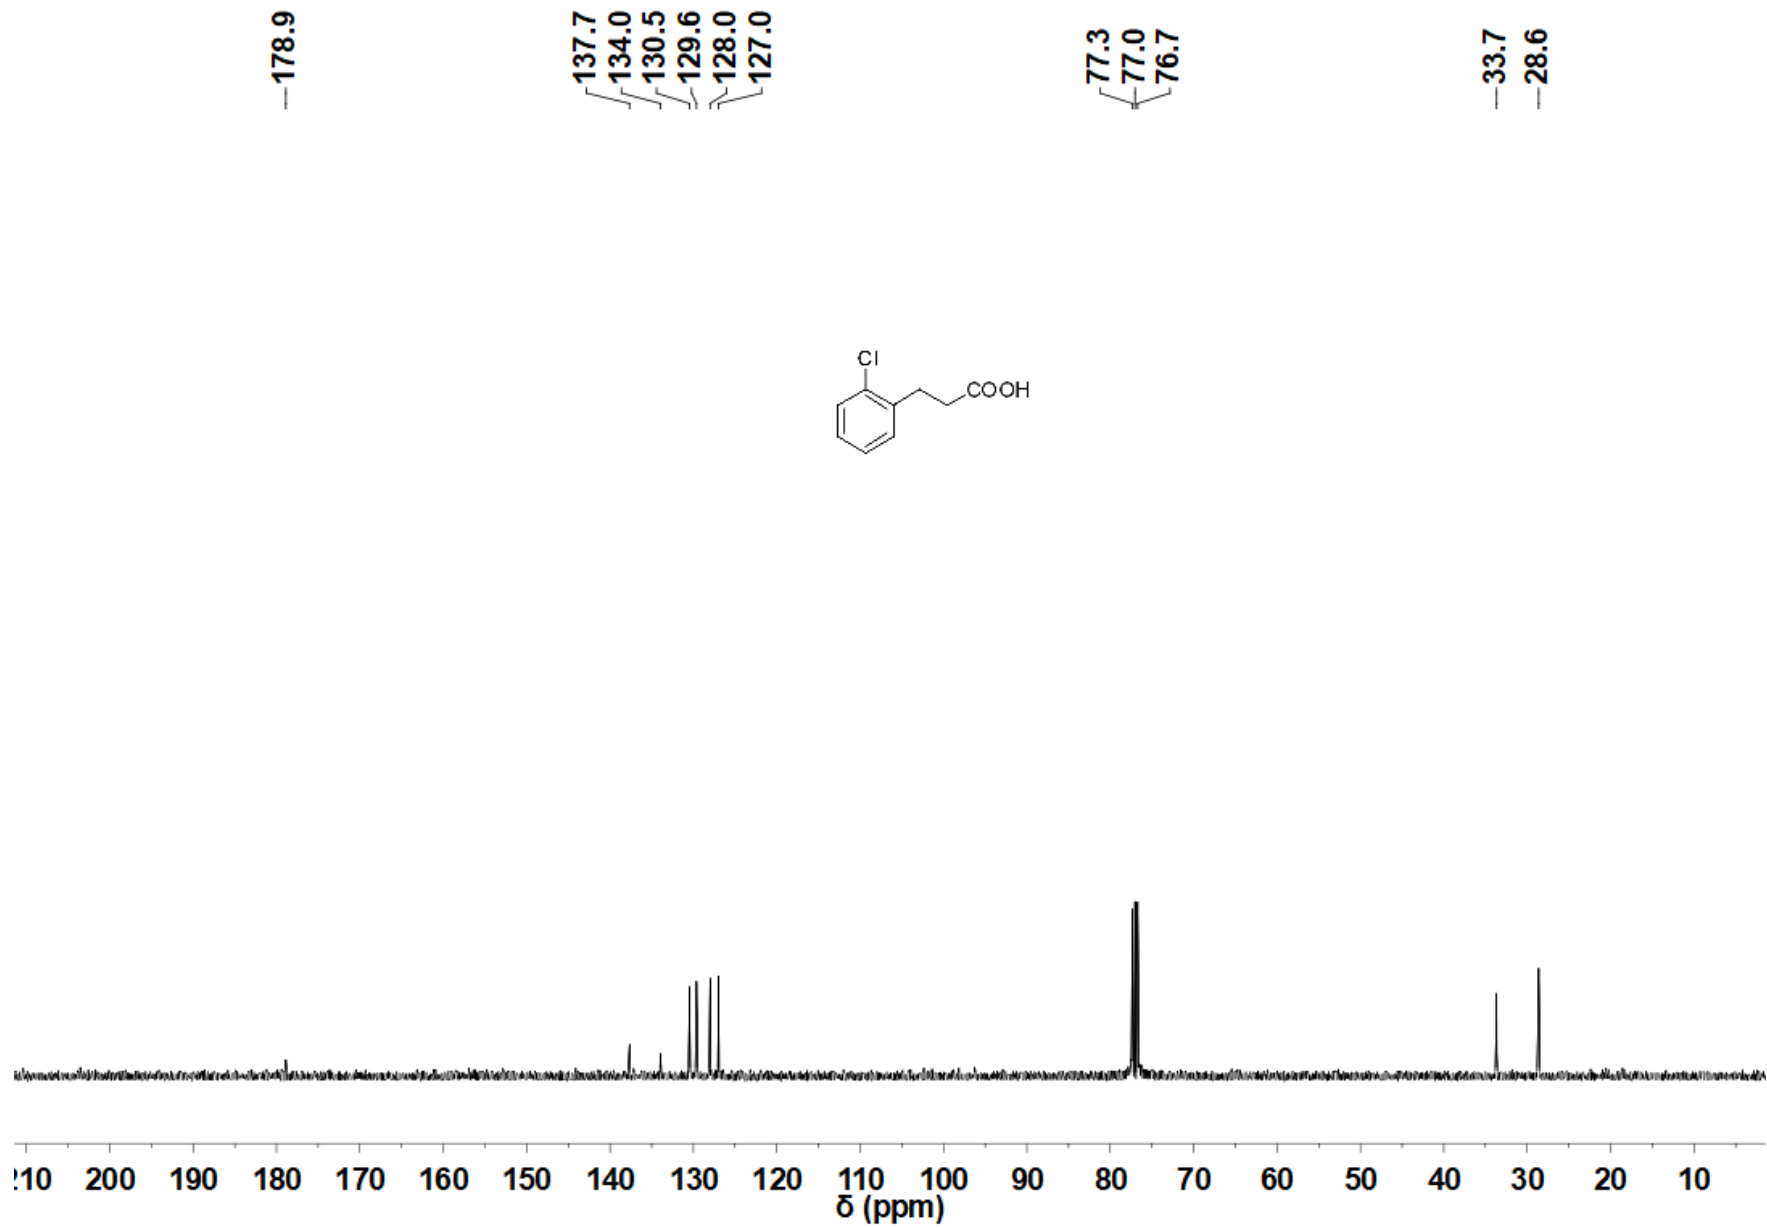

3-(2-bromophenyl) propanoic acid, **3x**  
400 MHz, CDCl<sub>3</sub>

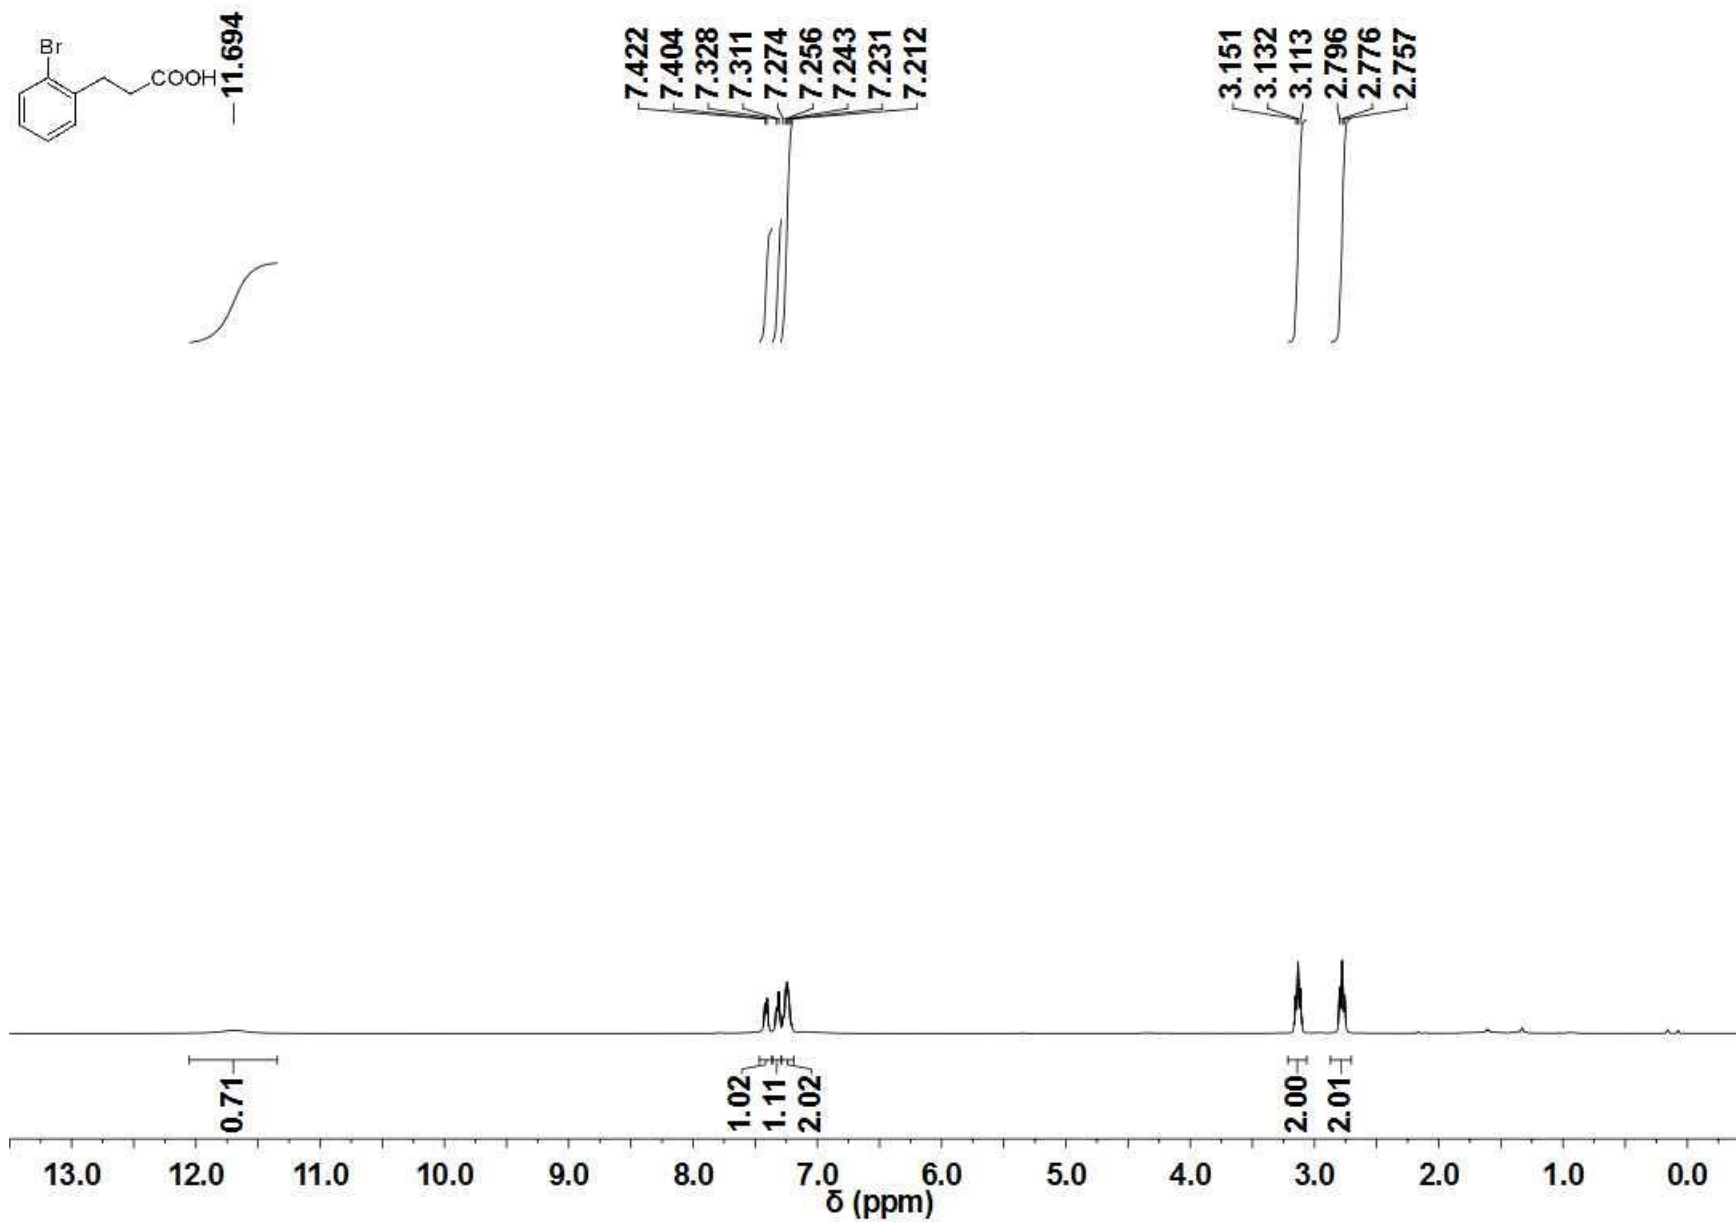

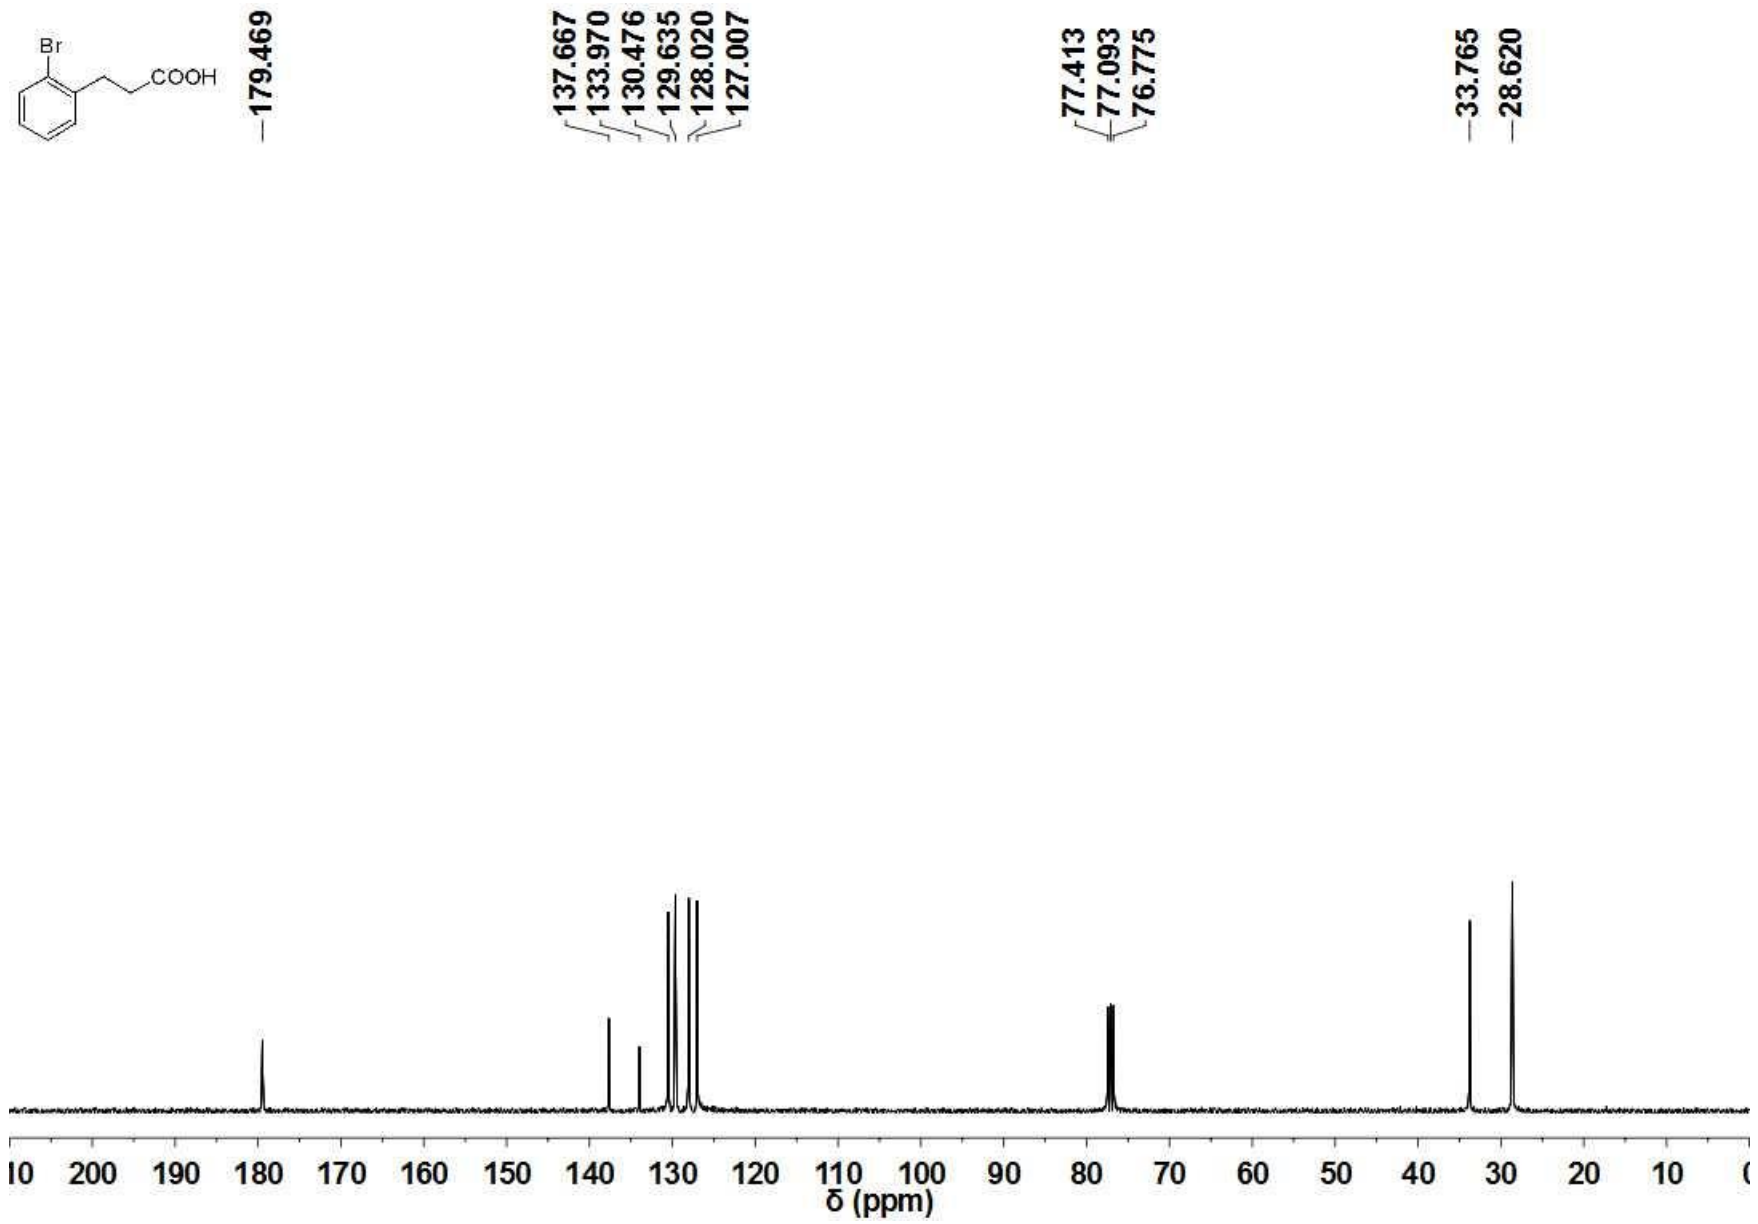

4-phenylbutanoic acid, **3z**  
400 MHz, CDCl<sub>3</sub>

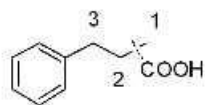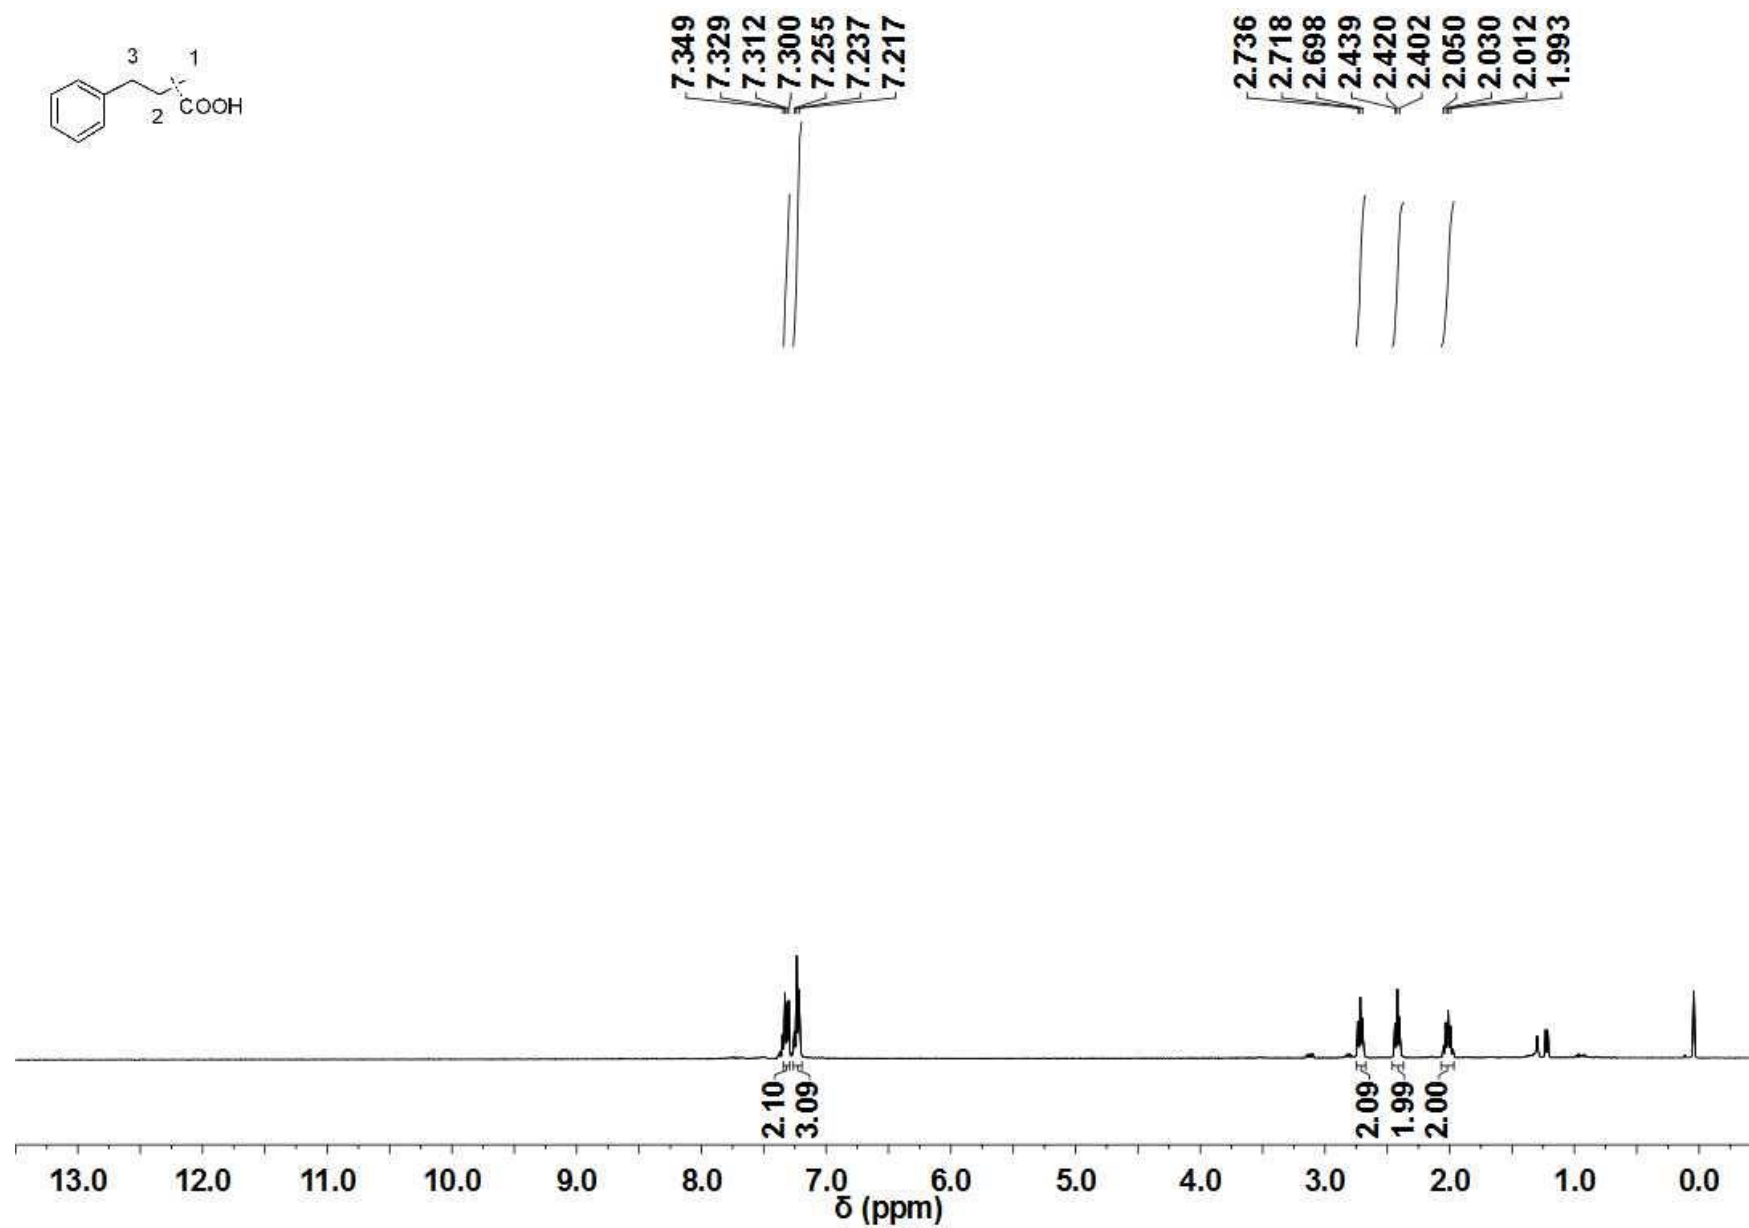



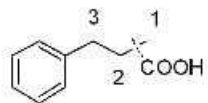

-180.327

-141.396

128.669

128.606

126.227

77.569

77.252

76.934

35.170

33.605

26.410

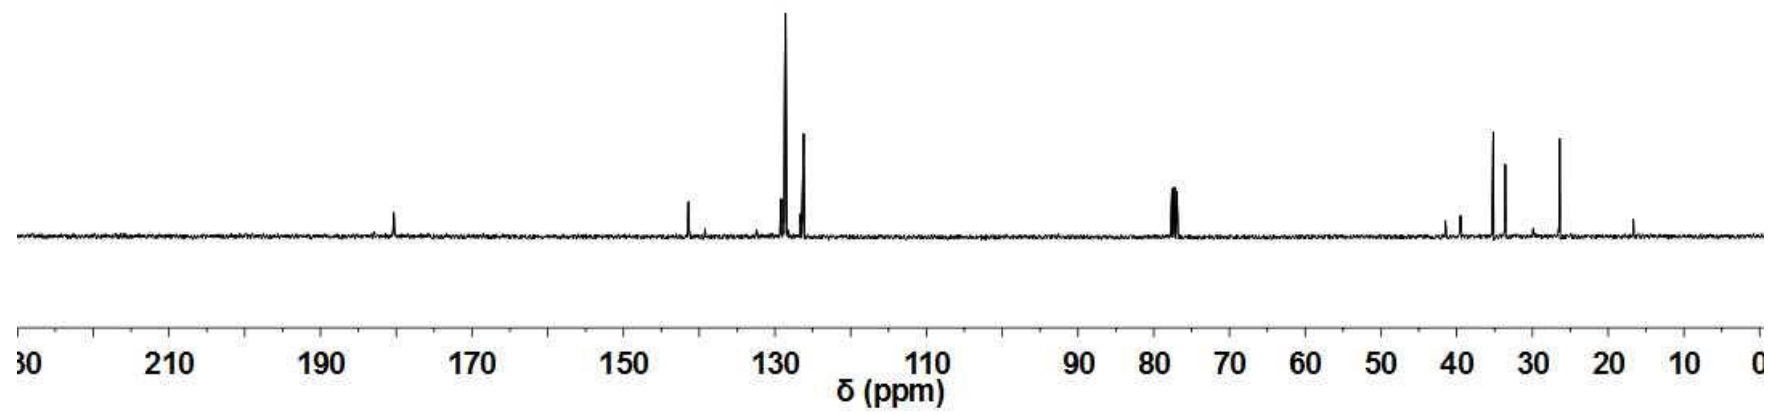

4-methylhexanoic acid, **3aa**  
400 MHz, CDCl<sub>3</sub>

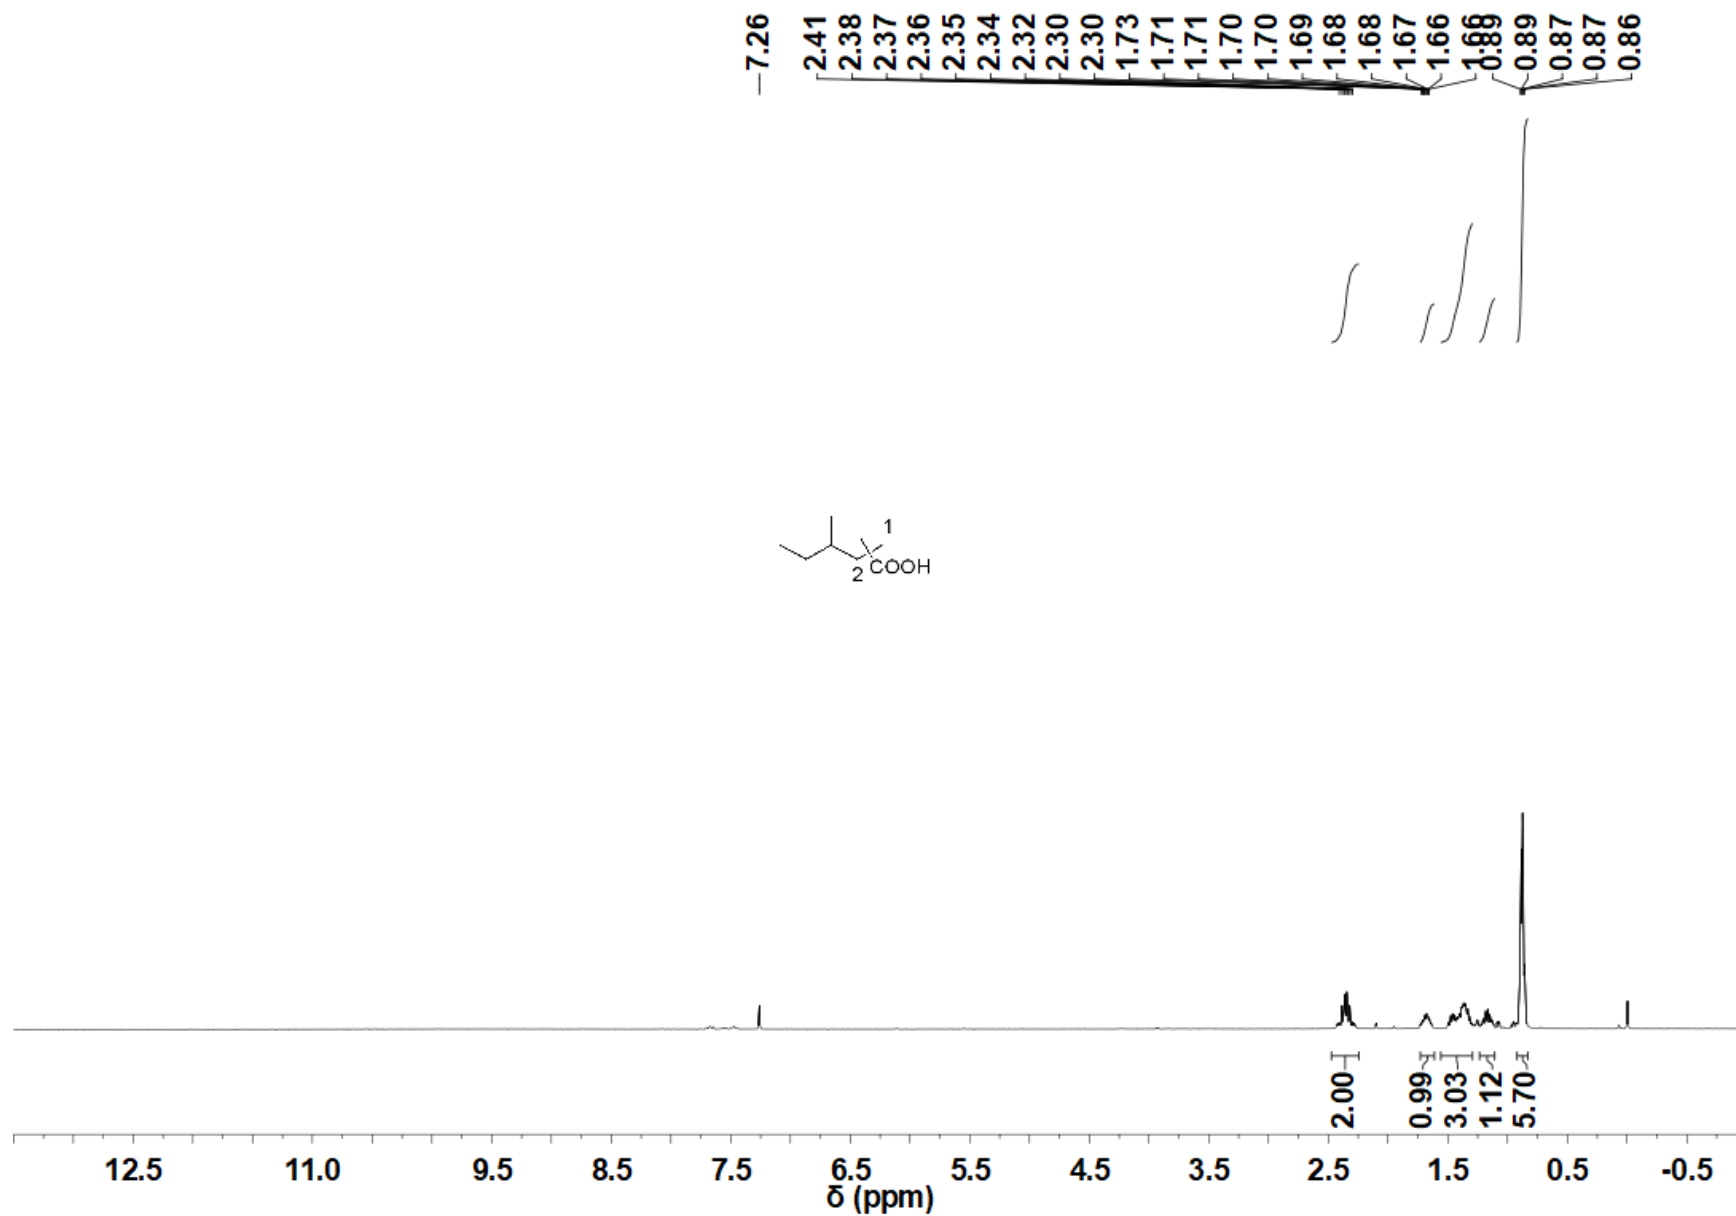

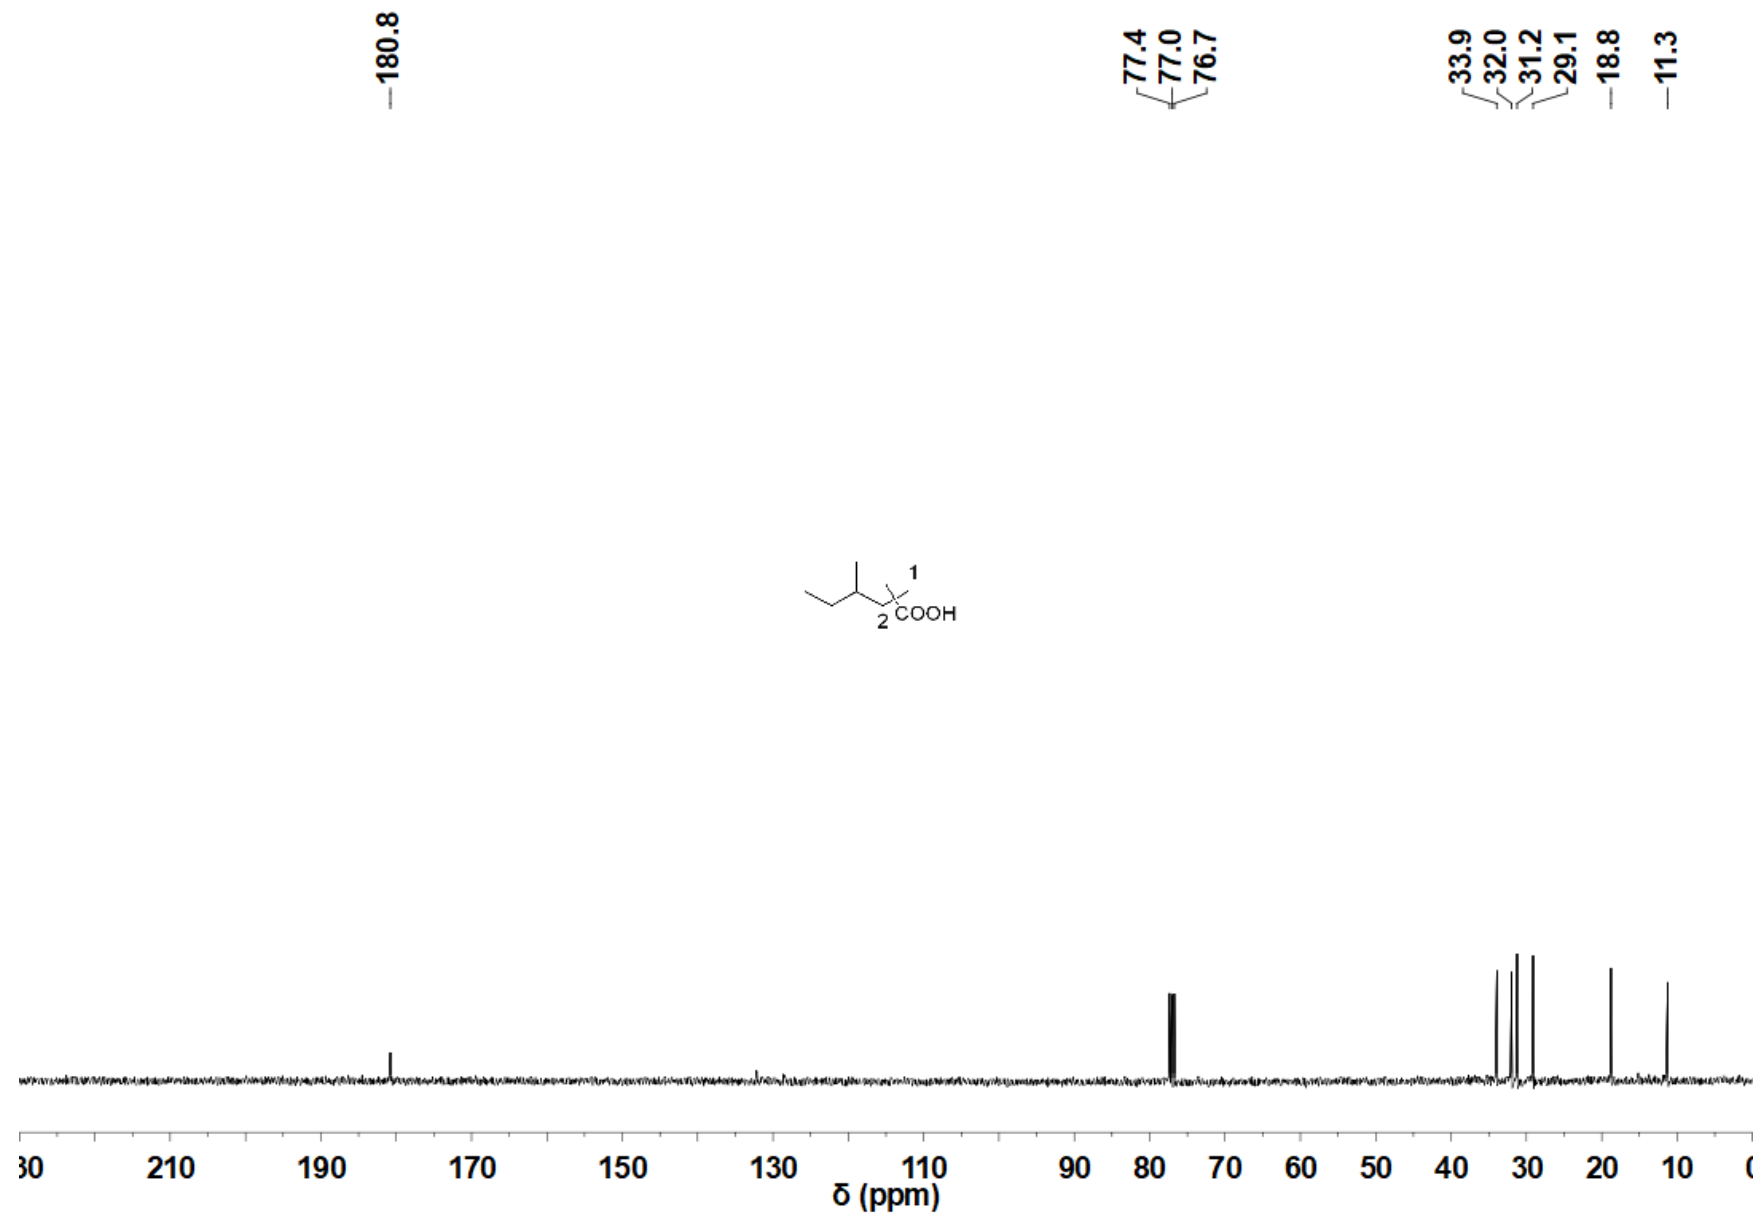

Supplement: c8cc01190g1.pdf [file c8cc01190g1.pdf]
